# Supplementary material for: A systematic genome-wide account of binding sites for the model transcription factor Gcn4
Source: HighWire-hosted journal article supplement (doi:10.1101/gr.276080.121), 2021-12-16
Supplement: Supplemental_Tables_S1_S2_S3_S4.xlsx [file Supplemental_Tables_S1_S2_S3_S4.xlsx]

## Sheet: Table S1
2021-09-17
List of AP-1 half-sites in the yeast genome: Exact matches to ATGAC/GTCAT: 25838 motifs
			291	3351	667		633	534
Chr	Coordinate	Motif	Full site	G-Selex peak	In Full Site SELEX peak	G-Selex Occ.	ChIP peak	In Full Site ChIP peak	ChIP Occ.
1	287	CATGACCTACT	0	0	0	2.05976	0	0	0.739176
1	1391	CATGACTTGTA	0	0	0	0.627339	0	0	1.1029
1	1659	ACACCGTCATT	0	0	0	0.0941008	0	0	0.633579
1	3245	CATGACAGTAG	0	0	0	0.0522782	0	0	0.657045
1	3457	AATGACTTAAA	0	0	0	0.0418226	0	0	0.51625
1	3705	AATGACAGGTA	0	0	0	0.177746	0	0	0.868238
1	4336	CATGACAAGCA	0	0	0	0.115012	0	0	0.633579
1	4438	GATGACAAAGT	0	0	0	0.0261391	0	0	0.680511
1	4771	CTTCAGTCATT	0	0	0	0.0679617	0	0	0.727443
1	5283	GATGACCTTTG	0	0	0	0.0784174	0	0	0.410653
1	5394	ACTTTGTCATT	0	0	0	0.156835	0	0	0.563182
1	5494	ACTTTGTCATA	0	0	0	0.297986	0	0	0.586647
1	5814	GATGACCCCCG	0	0	0	0.115012	0	0	0.586647
1	7153	TTTACGTCATA	0	0	0	0.0470504	0	0	0.469318
1	7856	TTACTGTCATT	0	0	0	0.0365948	0	0	0.727443
1	8874	CATGACTCTGG	0	0	0	0.418226	0	0	0.727443
1	8918	TTTAAGTCATC	0	0	0	0.271847	0	0	0.563182
1	9388	AAGGTGTCATT	0	0	0	0.449593	0	0	0.527983
1	9765	CATGACATTTC	0	0	0	0.0627339	0	0	0.586647
1	10036	AATGACGGACA	0	0	0	0.292758	0	0	0.551449
1	10887	CAAGCGTCATT	0	0	0	0.146379	0	0	0.750909
1	10925	AATGACCTGCA	0	0	0	0.151607	0	0	0.786108
1	11208	AATAAGTCATA	0	0	0	0.0784174	0	0	0.645312
1	12953	AATGACGGATG	0	1	0	1.05079	0	0	0.950369
1	13010	AATGACAGGGG	0	1	0	3.11578	0	0	0.903437
1	13040	AATGACTGGAG	0	1	0	3.40331	0	0	0.762642
1	13085	AATGACTAGAG	0	1	0	2.01794	0	0	0.762642
1	13218	GATGACAAACT	0	0	0	1.19717	0	0	0.469318
1	13303	CAGTAGTCATC	0	0	0	1.4272	0	0	0.539716
1	13390	GTTAGGTCATC	0	0	0	0.423454	0	0	0.563182
1	13678	GCAGAGTCATC	0	1	0	3.13669	0	0	0.844772
1	13739	AACCTGTCATT	0	0	0	1.29127	0	0	0.91517
1	13835	TATGACCTCTG	0	0	0	0.16729	0	0	0.797841
1	13978	CAGAAGTCATA	0	0	0	0.146379	0	0	0.739176
1	14242	CATATGTCATT	0	0	0	0.386859	0	0	0.563182
1	15405	AGGGTGTCATG	0	0	0	0.172518	0	0	0.621846
1	15839	TATGACCAAAA	0	0	0	0.182974	0	0	0.586647
1	16269	AAGTAGTCATT	0	0	0	0.235252	0	0	0.574915
1	16285	CGACGGTCATT	0	0	0	0.292758	0	0	0.539716
1	17452	GATGACGGCTA	0	0	0	0.24048	0	0	0.71571
1	18580	GGTAAGTCATA	0	0	0	0.12024	0	0	0.856505
1	19954	ACCCTGTCATT	0	0	0	0.0731895	0	0	0.563182
1	20083	AATGACCCACC	0	0	0	0.637795	0	0	0.821306
1	20126	ACCAAGTCATA	0	0	0	0.569833	0	0	0.797841
1	22221	AGTGAGTCATT	1	0	1	516.807	0	1	4.36466
1	23038	CATCAGTCATT	0	0	0	0.878275	0	0	0.797841
1	23166	AAAGTGTCATT	0	0	0	0.40777	0	0	0.833039
1	25118	AATGACGGATG	0	1	0	3.12101	0	0	0.856505
1	25175	AATGACAGGGG	0	1	0	5.34284	0	0	0.739176
1	25205	AATGACTGGAG	0	1	0	4.99257	0	0	0.71571
1	25250	AATGACTAGAG	0	1	0	2.0284	0	0	0.657045
1	25380	GATGACAAACT	0	0	0	1.34878	0	0	0.434119
1	25424	AATGACAGTTT	0	0	0	1.27036	0	0	0.281591
1	25465	TGGTGGTCATC	0	0	0	0.873047	0	0	0.211193
1	25600	CGGTGGTCATC	0	0	0	0.705756	0	0	0.234659
1	25688	GATGACAATGA	0	0	0	0.355492	0	0	0.492784
1	25694	AATGACGGTTT	0	0	0	0.324125	0	0	0.504517
1	25735	CGGTGGTCATT	0	0	0	0.297986	0	0	0.71571
1	25786	TTGTAGTCATG	0	0	0	0.297986	0	0	0.997301
1	25823	GATGACAATGA	0	0	0	0.297986	0	0	1.11463
1	25921	TTGTAGTCATG	0	0	0	0.297986	0	0	1.56048
1	25958	GATGACAATGA	0	0	0	0.297986	0	0	1.53702
1	26005	CGGTGGTCATT	0	0	0	0.297986	0	0	1.73648
1	26093	GATGACAATGA	0	0	0	0.297986	0	0	1.45489
1	26140	CGGTGGTCATT	0	0	0	0.297986	0	0	1.52528
1	26228	GATGACAATGA	0	0	0	0.297986	0	0	1.53702
1	26275	CGGTGGTCATT	0	0	0	0.297986	0	0	1.52528
1	26326	TTGTAGTCATG	0	0	0	0.297986	0	0	1.44315
1	26363	GATGACAATGA	0	0	0	0.297986	0	0	1.27889
1	26461	TTGTAGTCATG	0	0	0	0.297986	0	0	1.34929
1	26498	GATGACAATGA	0	0	0	0.297986	0	0	1.19676
1	26596	TTGTAGTCATG	0	0	0	0.297986	0	0	1.09116
1	26633	GATGACAATGA	0	0	0	0.297986	0	0	1.11463
1	26731	TTGTAGTCATG	0	0	0	0.297986	0	0	0.844772
1	26768	GATGACAATGA	0	0	0	0.297986	0	0	0.833039
1	27038	GATGACAATGA	0	0	0	0.230024	0	0	0.469318
1	27044	AATGACGGTTT	0	0	0	0.230024	0	0	0.445852
1	27085	CGGTGGTCATT	0	0	0	0.214341	0	0	0.375454
1	27231	TCAAAGTCATC	0	0	0	1.19194	0	0	0.527983
1	27547	AACCTGTCATT	0	0	0	0.104556	0	0	0.363721
1	28071	TTAGTGTCATC	0	0	0	0.115012	0	0	0.71571
1	29316	GTTACGTCATA	0	0	0	0.0575061	0	0	0.574915
1	29802	TATGACATAAG	0	0	0	0.130696	0	0	0.621846
1	29870	AATGACGGGAT	0	0	0	0.209113	0	0	0.610113
1	29882	TTGGTGTCATT	0	0	0	0.245708	0	0	0.59838
1	30458	AATGACCAGTA	0	0	0	0.334581	0	0	0.727443
1	30693	AATGACGCACA	0	1	0	3.62288	0	0	0.692244
1	31369	GATGACCATGA	0	0	0	0.115012	0	0	0.786108
1	31432	AATGACTTCTG	0	0	0	0.219569	0	0	0.91517
1	31571	AATGACAAGCG	0	0	0	0.292758	0	0	0.680511
1	32896	GCTTCGTCATG	0	0	0	0.250936	0	0	1.11463
1	33342	ACCTTGTCATT	0	0	0	0.339809	0	0	0.739176
1	33635	GATTAGTCATA	0	1	0	31.3356	0	0	1.80687
1	35885	GCACGGTCATA	0	0	0	0.0679617	0	0	0.774375
1	36092	TATGACTGGTT	0	1	0	5.83948	0	0	1.1029
1	36307	AATGACAAAAT	0	0	0	0.109784	0	0	0.586647
1	39594	AATGACATATT	0	0	0	0.24048	0	0	0.633579
1	40038	TATGACATTTC	0	0	0	0.104556	0	0	0.551449
1	40572	ACAATGTCATC	0	0	0	0.324125	0	0	0.645312
1	41049	AAACCGTCATA	0	0	0	0.125468	0	0	0.504517
1	41259	AAATCGTCATC	0	0	0	0.308442	0	0	0.645312
1	41276	AATGACTGCGA	0	0	0	0.308442	0	0	0.668778
1	42551	TTATGGTCATG	0	0	0	0.256163	0	0	0.645312
1	43022	GGCAAGTCATC	0	0	0	0.104556	0	0	0.59838
1	43187	GTCAAGTCATC	0	0	0	0.475732	0	0	0.621846
1	44240	AGCGCGTCATC	0	0	0	1.0142	0	0	0.668778
1	44269	AATGACTTTAC	0	0	0	1.04034	0	0	0.703977
1	44305	GATGACAACTT	0	0	0	0.883502	0	0	0.762642
1	45315	GATGACCCCAA	0	0	0	0.245708	0	0	0.410653
1	45369	GGGGGGTCATC	0	0	0	0.454821	0	0	0.51625
1	46256	TTGATGTCATG	0	0	0	0.501871	0	0	0.551449
1	46369	AATGACACGGA	0	0	0	0.501871	0	0	0.481051
1	47474	TCTTTGTCATT	0	0	0	0.266619	0	0	0.727443
1	47767	GATGACCGTGT	0	0	0	1.06125	0	0	1.04423
1	47773	CGTGTGTCATT	0	0	0	1.05079	0	0	1.07943
1	48041	CCGCTGTCATG	0	0	0	0.820768	0	0	0.809573
1	48088	CGTGCGTCATC	0	0	0	1.18672	0	0	1.09116
1	48561	CGTAAGTCATG	0	0	0	0.104556	0	0	0.633579
1	48851	TATGACGTATC	0	0	0	1.85065	0	0	0.821306
1	49135	TAGAAGTCATC	0	0	0	0.24048	0	0	0.633579
1	49161	GTAAAGTCATG	0	0	0	0.235252	0	0	0.59838
1	50407	GATGACATACT	0	0	0	0.146379	0	0	0.739176
1	50534	GATGACATGAA	0	0	0	0.162063	0	0	0.657045
1	51081	TCGATGTCATT	0	0	0	0.616883	0	0	0.680511
1	51680	TATGACTTTTT	0	0	0	0.0836452	0	0	0.574915
1	51698	AATGACTTTGC	0	0	0	0.0784174	0	0	0.492784
1	52236	TTTGGGTCATA	0	0	0	0.245708	0	0	0.633579
1	53433	AATGACAAAGC	0	0	0	0.214341	0	0	0.844772
1	53455	TTTCTGTCATT	0	0	0	0.209113	0	0	0.797841
1	53597	AAGTCGTCATA	0	0	0	0.230024	0	0	0.727443
1	53860	ATTTTGTCATT	0	0	0	0.0784174	0	0	0.680511
1	54121	TCGTTGTCATC	0	0	0	0.564605	0	0	0.833039
1	54183	CATGACAGCCA	0	0	0	0.0679617	0	0	0.809573
1	54459	AATGACAGGAA	0	0	0	0.575061	0	0	0.962102
1	54514	ACATGGTCATA	0	0	0	0.386859	0	0	0.868238
1	54785	CTTTAGTCATT	0	0	0	0.292758	0	0	1.50182
1	55034	AATGACTCATT	1	0	1	16.7552	0	1	10.3485
1	55586	TGAAGGTCATT	0	0	0	0.24048	0	0	0.657045
1	55607	TCCAAGTCATT	0	0	0	0.219569	0	0	0.668778
1	55963	TATGACAATCT	0	0	0	0.088873	0	0	0.657045
1	56072	TTACTGTCATG	0	0	0	2.17478	0	0	0.703977
1	56084	ATTTCGTCATT	0	0	0	2.24274	0	0	0.668778
1	56555	TCAGTGTCATT	0	0	0	0.224796	0	0	0.774375
1	56720	GATGACCTCGT	0	0	0	1.02465	0	0	0.727443
1	56727	TCGTGGTCATG	0	0	0	1.23377	0	0	0.727443
1	56792	CTGTCGTCATC	0	1	0	2.25842	0	0	0.739176
1	56810	GTGTTGTCATT	0	1	0	2.24274	0	0	0.727443
1	57279	CCGGAGTCATT	0	0	0	0.820768	0	0	0.692244
1	57464	AATGACGAATC	0	0	0	0.329353	0	0	0.59838
1	57953	GTTCAGTCATC	0	0	0	0.569833	0	0	0.809573
1	58573	AATGACTCCTT	0	0	0	1.17103	0	0	1.26716
1	59181	CATGACGAGGA	0	0	0	2.42571	0	0	0.926903
1	59190	GAGTCGTCATC	0	0	0	2.36298	0	0	0.91517
1	59427	ATTCGGTCATC	0	0	0	0.188202	0	0	1.19676
1	59541	CCGTCGTCATC	0	0	0	3.23602	0	0	0.938636
1	59574	GATGACGAGGA	0	0	0	3.3249	0	0	0.750909
1	59703	AGTATGTCATT	0	0	0	0.951464	0	0	0.633579
1	60126	GATGACCCTGA	0	0	0	0.115012	0	0	0.750909
1	60329	GATGACGAAGG	0	0	0	0.125468	0	0	0.680511
1	61050	GATGACATTGC	0	0	0	0.245708	0	0	0.387187
1	62273	ATGTTGTCATT	0	0	0	0.209113	0	0	0.434119
1	62414	TGAAAGTCATC	0	0	0	0.088873	0	0	0.680511
1	62504	GCACTGTCATG	0	0	0	0.245708	0	0	0.750909
1	62575	AGACTGTCATA	0	0	0	0.177746	0	0	0.727443
1	62933	AAAATGTCATG	0	0	0	0.423454	0	0	0.610113
1	63442	TATGACTTTAT	0	0	0	0.0575061	0	0	0.844772
1	64732	AACCGGTCATT	0	0	0	0.125468	0	0	0.59838
1	64816	AATTGGTCATC	0	1	0	1.36446	0	0	0.703977
1	66091	GGGTCGTCATT	0	0	0	0.308442	0	0	0.833039
1	68771	AACGGGTCATC	0	0	0	0.130696	0	0	1.66608
1	69444	CATGACTGGGC	0	0	0	0.76849	0	0	0.692244
1	70071	CATGACTATTA	0	1	0	2.48844	0	0	1.66608
1	70352	AATGACGTTTG	0	0	0	0.0731895	0	0	0.586647
1	70771	GATGACTTGAG	0	0	0	0.115012	0	0	0.879971
1	70941	CATGACCCCGG	0	0	0	0.0261391	0	0	0.363721
1	71972	AGTCTGTCATT	0	0	0	0.172518	0	0	1.52528
1	72130	GATGACAAGTA	0	1	0	7.86788	0	0	1.18503
1	72191	CCAAGGTCATC	0	1	0	4.31818	0	0	0.997301
1	72699	CATGACTTACA	0	0	0	0.141151	0	0	1.04423
1	72842	CCGCTGTCATT	0	0	0	1.1083	0	0	1.09116
1	72886	GATGACATGAG	0	0	0	1.04034	0	0	1.19676
1	73475	TTGTCGTCATA	0	0	0	0.501871	0	0	0.962102
1	73760	AATGACGCGGG	0	0	0	0.0261391	0	0	0.668778
1	74058	GATGACCTGAA	0	0	0	0.12024	0	0	0.657045
1	74487	TTTAAGTCATT	0	0	0	1.1083	0	0	0.680511
1	74495	ATTTAGTCATT	0	0	0	1.26513	0	0	0.680511
1	74576	GATGACCTACT	0	0	0	0.758035	0	0	0.668778
1	75297	CATGACTTGCA	0	0	0	0.104556	0	0	1.02077
1	75541	ATTTCGTCATT	0	0	0	0.28753	0	0	0.586647
1	75837	AATGACACCGG	0	0	0	0.245708	0	0	0.633579
1	76555	GATGACACTTC	0	0	0	0.214341	0	0	0.797841
1	77359	GATGACGAACT	0	0	0	0.475732	0	0	0.962102
1	77425	GATGACGAGGA	0	0	0	0.486188	0	0	0.962102
1	77661	TTTGGGTCATG	0	0	0	0.0836452	0	0	0.410653
1	78037	TATGACTGGAA	0	0	0	0.0993287	0	0	0.563182
1	78613	GATGACGAAGA	0	0	0	0.643022	0	0	0.633579
1	78929	CAGACGTCATC	0	0	0	0.230024	0	0	0.51625
1	79175	GTAAAGTCATC	0	0	0	0.088873	0	0	0.71571
1	79290	GGGTCGTCATG	0	0	0	0.188202	0	0	0.645312
1	80054	ATCTGGTCATT	0	0	0	0.177746	0	0	0.879971
1	80284	GATGACACAAT	0	1	0	139.85	0	0	0.844772
1	80292	AATGACTCTAC	0	1	0	140.561	0	0	0.879971
1	81182	TGGTAGTCATC	0	0	0	1.15012	0	0	1.0325
1	81371	GAGGAGTCATA	0	0	0	1.70427	0	0	1.83034
1	82230	TATGACTGTCG	0	0	0	0.585516	0	0	0.574915
1	83164	AATGACTTTAT	0	0	0	0.245708	0	0	0.527983
1	83500	GGGTTGTCATA	0	0	0	0.156835	0	0	0.39892
1	84262	TATGACTTGGT	0	0	0	0.690073	0	0	1.09116
1	85038	CCTCTGTCATT	0	0	0	0.151607	0	0	0.51625
1	85302	TTAACGTCATG	0	0	0	0.141151	0	0	0.504517
1	85766	CGCAAGTCATT	0	0	0	0.0209113	0	0	0.469318
1	86430	TCAATGTCATT	0	0	0	0.0784174	0	0	0.527983
1	86831	GACTCGTCATT	0	0	0	0.0731895	0	0	0.727443
1	87291	ATGTCGTCATC	0	0	0	0.52801	0	0	0.492784
1	87933	CTAGTGTCATA	0	0	0	0.292758	0	0	0.750909
1	88326	ATTAGGTCATT	0	0	0	0.182974	0	0	0.739176
1	88847	AATGACGTGTA	0	0	0	1.31741	0	0	0.692244
1	89394	TATGAGTCATT	1	0	1	89.9918	0	1	13.0588
1	90505	GATGACCTAGG	0	0	0	0.0627339	0	0	0.657045
1	91219	TTCTAGTCATT	0	0	0	0.428682	0	0	0.539716
1	91311	AATGACAGGGC	0	0	0	0.125468	0	0	0.657045
1	91410	GATGACAAATG	0	0	0	0.104556	0	0	0.739176
1	92046	GTTAAGTCATC	0	0	0	0.371176	0	0	0.739176
1	92190	AAGAAGTCATT	0	0	0	0.182974	0	0	0.938636
1	92268	AATGACATGCG	0	0	0	0.0418226	0	0	0.985568
1	93150	TGCTCGTCATA	0	0	0	0.449593	0	0	0.657045
1	93880	TCGACGTCATT	0	0	0	1.77223	0	0	0.821306
1	93987	TCAGCGTCATA	0	0	0	0.376403	0	0	0.809573
1	94069	AATGACCTTGT	0	0	0	0.172518	0	0	0.692244
1	94445	TCATCGTCATA	0	0	0	0.182974	0	0	0.481051
1	94997	AGTTGGTCATT	0	0	0	0.292758	0	0	0.633579
1	95568	AATGACTTTTC	0	0	0	0.0575061	0	0	0.375454
1	95756	TTATTGTCATT	0	0	0	0.146379	0	0	0.680511
1	96271	AATGACACTTG	0	0	0	0.209113	0	0	0.504517
1	96520	AATGACAAAAG	0	0	0	0.162063	0	0	0.539716
1	96624	ACTGCGTCATG	0	0	0	0.271847	0	0	0.610113
1	96998	AATGACTTCCC	0	0	0	0.224796	0	0	0.457585
1	97012	AATGACGAGCG	0	0	0	0.24048	0	0	0.492784
1	97522	AATGACAGTAT	0	0	0	0.28753	0	0	0.657045
1	97792	AATGACAGTAT	0	0	0	2.14864	0	0	0.762642
1	97800	TATGACAGGTA	0	0	0	2.21137	0	0	0.727443
1	97823	AAGAAGTCATT	0	0	0	2.17478	0	0	0.727443
1	98436	CATGACCAGTG	0	0	0	0.115012	0	0	0.610113
1	98538	TTAAAGTCATT	0	0	0	0.0836452	0	0	0.59838
1	98729	GATGACAAAAT	0	0	0	0.282303	0	0	0.797841
1	98819	ACAAAGTCATC	0	0	0	0.36072	0	0	0.680511
1	99148	GATGACTCTTG	0	1	0	1.68336	1	0	2.49912
1	99449	TGGTCGTCATG	0	1	0	0.993287	0	0	1.91247
1	99546	CATGACTTGGT	0	1	0	0.794629	0	0	1.00903
1	99689	CTGTCGTCATT	0	0	0	0.0575061	0	0	0.91517
1	100447	TCTAAGTCATC	0	1	0	2.20091	0	0	0.59838
1	100794	CATGACCTGCG	0	0	0	0.444365	0	0	0.703977
1	100832	TATGACGGAAA	0	0	0	0.334581	0	0	0.692244
1	102047	AATGACATTTC	0	0	0	0.0575061	0	0	0.610113
1	102265	TCAAGGTCATT	0	0	0	0.0993287	0	0	0.586647
1	102561	AATGACGGCAA	0	0	0	0.0627339	0	0	0.680511
1	102711	GGATCGTCATT	0	0	0	0.376403	0	0	0.891704
1	102825	GATGTGTCATT	0	1	0	4.38614	0	0	0.903437
1	102957	CTACCGTCATC	0	0	0	0.146379	0	0	0.962102
1	103014	TCTAGGTCATT	0	0	0	0.0575061	0	0	0.809573
1	103884	GATGACAACTC	0	0	0	0.423454	0	0	0.703977
1	103990	AAGAAGTCATG	0	0	0	0.177746	0	0	0.774375
1	104032	TTGGTGTCATA	0	0	0	0.219569	0	0	0.809573
1	104300	GATGACTGACT	0	0	0	0.705756	0	0	1.0325
1	104958	GATGACGGGTA	0	0	0	0.198657	0	0	0.680511
1	107721	CATGACATGGA	0	0	0	0.141151	0	0	0.739176
1	108001	ACACGGTCATC	0	0	0	0.19343	0	0	0.610113
1	108084	AATGACGCGTT	0	0	0	0.250936	0	0	0.774375
1	108583	AATGACAGTAG	0	0	0	0.36072	0	0	0.574915
1	108642	AATGACCTTTT	0	0	0	0.0941008	0	0	0.539716
1	109038	GATGACGTGCC	0	0	0	0.548922	0	0	0.750909
1	109251	AATGACTCTTC	0	1	0	4.64231	0	0	1.23196
1	109650	CATGACCACAC	0	0	0	0.606428	0	0	0.903437
1	109794	CATGACACCTT	0	0	0	1.38015	0	0	0.621846
1	109850	TCTGTGTCATG	0	0	0	2.18	0	0	0.692244
1	109953	CATGACAGTAA	0	0	0	0.162063	0	0	0.727443
1	109992	TATGACCCTTC	0	0	0	0.235252	0	0	0.750909
1	111041	AATGACGGTGT	0	0	0	0.345036	0	0	0.657045
1	112390	CATGACCATTC	0	0	0	1.20763	0	0	0.469318
1	112409	ATGTCGTCATC	0	0	0	1.31218	0	0	0.481051
1	112916	GAAGGGTCATC	0	0	0	0.177746	0	0	0.750909
1	114039	TATGACCATGA	0	0	0	0.19343	0	0	0.39892
1	114379	CTCCAGTCATG	0	0	0	0.789402	0	0	0.328523
1	114454	TTCCCGTCATT	0	0	0	2.04408	0	0	0.410653
1	114951	GATGACGTAGT	0	0	0	0.28753	0	0	0.610113
1	115329	AAGAAGTCATT	0	0	0	0.130696	1	1	2.49912
1	115447	CAAACGTCATC	0	0	0	0.297986	1	1	7.59122
1	115590	TATGAGTCATC	1	0	1	398.752	0	1	18.9487
1	115652	CGGTCGTCATG	0	1	1	320.915	1	1	13.0236
1	115697	GATGACGGACG	0	1	1	154.216	1	1	10.2898
1	115707	GATGACGATGC	0	1	1	111.557	1	1	9.70315
1	115785	AATGACTCTGA	0	0	0	0.627339	1	1	5.03344
1	116145	GATGACGACGA	0	0	0	1.1658	0	0	0.797841
1	116370	GATGACGATGT	0	1	0	11.2869	0	0	0.797841
1	116397	GATGACGAATT	0	1	0	25.0674	0	0	0.762642
1	116430	GATGACTATGA	0	1	0	41.5403	0	0	0.821306
1	116502	GATGACGATGA	0	1	0	31.6283	0	0	0.891704
1	116511	GATGACGATGA	0	1	0	24.6544	0	0	0.879971
1	116691	AAGATGTCATG	0	0	0	0.16729	0	0	0.739176
1	116737	GTCAAGTCATT	0	0	0	0.156835	0	0	0.610113
1	117032	TGAAGGTCATA	0	0	0	0.0575061	0	0	0.633579
1	117677	TATGACGGATT	0	0	0	0.465276	0	0	0.668778
1	117747	AATGACGAGTG	0	0	0	0.297986	0	0	0.692244
1	118074	GATGACAGACA	0	0	0	0.182974	0	0	1.0325
1	119087	AATGACTGAGT	0	0	0	0.214341	0	0	0.645312
1	120108	CGTTCGTCATC	0	0	0	0.12024	0	0	0.703977
1	122164	AGATAGTCATT	0	0	0	1.22854	0	0	0.739176
1	122183	TCGCTGTCATC	0	0	0	1.31741	0	0	0.692244
1	122315	GATGACGACCT	0	0	0	0.198657	0	0	0.692244
1	122627	AATGACAAATA	0	0	0	0.0679617	0	0	0.762642
1	122805	TGCGTGTCATG	0	0	0	0.109784	0	0	0.786108
1	123418	AATGACTAACA	0	1	0	2.24274	0	0	0.997301
1	123832	CATGACCGAAT	0	0	0	0.104556	0	0	0.633579
1	124980	AACGAGTCATT	0	0	0	2.3682	0	0	0.879971
1	126064	ATCAAGTCATT	0	0	0	0.297986	0	0	0.821306
1	126162	AATGACGTAAT	0	0	0	0.449593	0	0	0.856505
1	126582	GATGACGGTGT	0	0	0	0.292758	0	0	0.833039
1	127555	CTAATGTCATA	0	0	0	0.376403	0	0	0.586647
1	128462	GAAATGTCATG	0	0	0	0.209113	0	0	0.762642
1	128672	TCATCGTCATC	0	1	0	7.03665	0	0	0.950369
1	128689	CATGACCGTAA	0	1	0	6.24202	0	0	0.938636
1	128699	AGCTCGTCATC	0	1	0	5.34806	0	0	0.962102
1	129811	GATGACTGCGC	0	0	0	0.554149	0	0	0.375454
1	129875	TATGACAATCA	0	0	0	0.423454	0	0	0.457585
1	130164	ATATAGTCATC	0	0	0	0.554149	0	0	0.422386
1	130341	TCGAAGTCATT	0	0	0	0.141151	0	0	0.340256
1	130803	TATGACTCTAC	0	0	0	1.43242	0	0	1.19676
1	131847	GATGACCCACG	0	0	0	0.146379	0	0	0.504517
1	132315	GATGACGACGA	0	1	0	64.7989	0	0	0.610113
1	132360	AATGACTATGA	0	1	0	62.0386	0	0	0.633579
1	132366	TATGACGAGTA	0	1	0	56.0214	0	0	0.668778
1	132729	AATGACAAAAT	0	0	0	0.914869	0	0	1.00903
1	133014	CATGACCCAAG	0	0	0	0.0731895	0	0	0.527983
1	133323	GATGACGAGAA	0	0	0	0.282303	0	0	0.633579
1	133841	AATGACAATGA	0	0	0	0.130696	0	0	0.633579
1	134406	AATGACGTGCT	0	0	0	0.172518	0	0	0.938636
1	134502	AATGACGACGA	0	0	0	0.130696	0	0	0.891704
1	135267	TTCGAGTCATG	0	1	0	9.19052	0	0	0.833039
1	135285	TTCTTGTCATT	0	1	0	9.6192	0	0	0.809573
1	135851	AGGAGGTCATG	0	0	0	0.156835	0	0	0.340256
1	136250	CTATCGTCATT	0	0	0	0.109784	0	0	0.856505
1	136667	AAGAGGTCATA	0	0	0	0.0679617	0	0	0.797841
1	136773	AATCCGTCATT	0	0	0	0.0731895	0	0	0.774375
1	136918	AATGACTTTGG	0	0	0	0.088873	0	0	0.586647
1	137524	AATGACCAGAT	0	0	0	0.130696	0	0	0.668778
1	137929	ATAATGTCATC	0	0	0	0.611655	0	0	0.821306
1	138894	GATGACTGTCT	0	0	0	0.590744	0	0	0.797841
1	139665	AACTTGTCATC	0	0	0	0.392087	0	0	0.750909
1	140209	ACTTGGTCATG	0	0	0	0.355492	0	0	1.12636
1	140216	CATGACACCAC	0	0	0	0.423454	0	0	1.17329
1	141015	ACAGCGTCATT	0	0	0	0.0575061	0	0	0.621846
1	141750	AATGACAGCTT	0	0	0	0.0627339	0	0	1.47835
1	142239	GACAAGTCATA	0	0	0	0.12024	0	0	1.1029
1	142776	GATGACGATGT	0	0	0	0.261391	0	0	1.12636
1	143070	GATGACAAGGT	0	0	0	0.820768	0	0	1.16156
1	143088	GATGACTTGCA	0	0	0	0.794629	0	0	1.14983
1	143766	AATGACACTCA	0	0	0	1.03511	0	0	0.879971
1	144124	CAATTGTCATA	0	0	0	0.622111	0	0	0.680511
1	144242	TATGACCCCAA	0	0	0	0.376403	0	0	0.645312
1	144282	GATGACCATGT	0	0	0	0.433909	0	0	0.762642
1	144840	CATGACTTCAA	0	0	0	0.151607	0	0	0.903437
1	145935	GATGACAATGA	0	0	0	0.695301	0	0	0.950369
1	145941	AATGACATGGT	0	0	0	0.653478	0	0	0.962102
1	147415	CCCTTGTCATA	0	0	0	0.308442	0	0	0.692244
1	148259	GATGACGTTAT	0	0	0	0.230024	0	0	0.844772
1	148494	AGTGTGTCATC	0	0	0	1.0717	0	0	1.1381
1	148711	TATGACCCATT	0	0	0	0.40777	0	0	0.985568
1	148998	ATAGCGTCATC	0	0	0	0.245708	0	0	0.727443
1	150057	GCAATGTCATA	0	0	0	0.0679617	0	0	0.71571
1	150552	ACCCCGTCATG	0	0	0	0.0941008	0	0	0.797841
1	151474	CATGACATAAT	0	0	0	0.109784	0	0	1.64261
1	152685	GTGATGTCATT	0	0	0	0.219569	0	0	0.833039
1	153108	AATGACAGTAA	0	0	0	0.219569	0	0	0.703977
1	153968	ATTTAGTCATT	0	0	0	0.282303	0	0	0.879971
1	154151	AATGACAATCC	0	0	0	0.130696	0	0	0.680511
1	154557	AATTGGTCATC	0	0	0	0.182974	0	0	0.868238
1	156276	ATGCAGTCATC	0	0	0	0.669162	0	0	0.739176
1	156340	GTATAGTCATG	0	0	0	0.428682	0	0	0.739176
1	156444	AGCACGTCATG	0	0	0	0.214341	0	0	0.774375
1	156622	TATGACTGAAC	0	1	0	11.3601	0	0	0.985568
1	156645	ATCCAGTCATC	0	1	0	11.3392	0	0	1.00903
1	156892	CTAAAGTCATA	0	0	0	0.339809	0	0	0.997301
1	158314	TCAAAGTCATC	0	0	0	0.125468	0	0	0.645312
1	159238	AACAAGTCATT	0	0	0	0.151607	0	0	0.903437
1	159364	AATGACCAGCT	0	0	0	0.486188	0	0	0.797841
1	159722	TTTGGGTCATA	0	0	0	0.517555	0	0	1.18503
1	159805	AATCAGTCATG	0	0	0	0.548922	0	0	1.50182
1	160475	GATGACTATTT	0	1	0	12.4004	0	0	5.24463
1	160493	TTTGCGTCATC	0	1	0	12.3533	0	0	5.36196
1	160652	GTTTTGTCATC	0	0	0	0.250936	0	0	3.84841
1	161138	CATATGTCATG	0	0	0	0.465276	0	0	3.10923
1	161632	CATGACCATCC	0	0	0	0.454821	0	0	3.36736
1	161876	GGGATGTCATC	0	0	0	1.83497	0	0	2.78071
1	162043	TTTCTGTCATA	0	0	0	0.28753	0	0	2.71031
1	163048	TGGAAGTCATG	0	0	0	0.627339	0	0	4.52892
1	163522	CGGCAGTCATC	0	0	0	0.16729	0	0	4.10653
1	164291	AGTAAGTCATA	0	0	0	0.632567	0	0	5.35022
1	164863	CGACTGTCATA	0	1	0	3.04782	0	0	5.59662
1	164884	GATGACGTGTG	0	1	0	3.13669	0	0	5.77261
1	165327	GGAAAGTCATT	0	0	0	2.35775	0	0	8.1192
1	165379	TGGATGTCATA	0	1	1	7.44442	0	0	9.99647
1	165564	AATGACCAACC	0	0	0	1.35401	0	0	9.97301
1	165592	TTTGGGTCATC	0	0	0	1.75655	0	0	10.0551
1	166063	GATGACTATTT	0	1	0	12.2592	0	0	3.46122
1	166081	TTTGCGTCATC	0	1	0	12.1076	0	0	3.32042
1	166312	AAGAGGTCATC	0	0	0	0.256163	0	0	1.70128
1	166386	TGACTGTCATC	0	0	0	2.83871	0	0	1.81861
1	166486	TATGACACATT	0	1	0	8.37498	0	0	1.80687
1	166511	AATGACAGAAT	0	1	0	4.30773	0	0	1.60741
1	167999	TCCTGGTCATT	0	0	0	0.141151	0	0	0.657045
1	168194	TCAAAGTCATC	0	0	0	0.381631	0	0	0.856505
1	168200	TCATCGTCATC	0	0	0	0.397315	0	0	0.856505
1	168503	TCTTTGTCATC	0	0	0	1.23899	0	0	0.962102
1	168791	CCATTGTCATG	0	1	0	1.51084	0	0	1.32582
1	169503	TATGACGTTAT	0	0	0	0.329353	0	0	0.551449
1	169887	CATGACGAAAA	0	0	0	0.235252	0	0	0.668778
1	171230	ATCCGGTCATA	0	0	0	0.266619	0	0	0.750909
1	171273	AATGACATTTA	0	0	0	0.219569	0	0	0.797841
1	171580	GATGACTTTTC	0	0	0	0.104556	0	0	0.563182
1	172559	GTGTAGTCATA	0	0	0	0.355492	0	0	0.797841
1	172769	TTAACGTCATC	0	0	0	1.40106	0	0	1.1381
1	172775	TCATCGTCATT	0	0	0	1.5213	0	0	1.18503
1	172832	GCAGCGTCATT	0	0	0	1.51607	0	0	0.985568
1	173507	TTATCGTCATT	0	0	0	0.235252	0	0	0.551449
1	173642	TATGACGATAG	0	0	0	0.156835	0	0	0.645312
1	173863	GATGACGAACT	0	0	0	0.135923	0	0	0.645312
1	174712	GATGACTCCTT	0	1	0	9.18006	0	0	1.52528
1	174938	ATAATGTCATT	0	0	0	0.198657	0	0	0.774375
1	175048	AATGACCTGCT	0	0	0	0.219569	0	0	0.833039
1	175434	GATGACAAACG	0	0	0	0.496643	0	0	0.51625
1	176081	CAGTCGTCATT	0	0	0	0.0993287	0	0	0.59838
1	177222	ACTAAGTCATT	0	0	0	0.339809	0	0	0.387187
1	177678	AATGACGACTG	0	0	0	0.203885	0	0	0.527983
1	177829	AATGACGTGCC	0	0	0	0.130696	0	0	0.504517
1	177938	GATGACATGGA	0	0	0	0.182974	0	0	0.574915
1	178238	AATGACAATAA	0	0	0	0.381631	0	0	0.633579
1	178877	TATGACCTCTT	0	0	0	0.203885	0	0	0.750909
1	179203	TATGACTTCCT	0	0	0	0.0418226	0	0	0.645312
1	179689	AATGACCATAT	0	0	0	0.266619	0	0	0.797841
1	180740	CATGACTTATT	0	0	0	0.266619	0	0	0.786108
1	182653	TATGACAATAC	0	0	0	2.01794	0	0	2.93324
1	183242	AAGCTGTCATC	0	0	0	2.00748	0	0	0.71571
1	184106	TAGAAGTCATT	0	0	0	0.19343	0	0	0.797841
1	184699	AGCTGGTCATC	0	0	0	0.203885	0	0	0.445852
1	187161	TACTCGTCATA	0	0	0	0.277075	0	0	0.703977
1	187576	AATGACGAAAC	0	0	0	0.261391	0	0	0.926903
1	187806	TCAGTGTCATT	0	0	0	0.146379	0	0	0.551449
1	188077	CTATAGTCATA	0	0	0	0.392087	0	0	0.739176
1	188257	CACCAGTCATG	0	0	0	0.172518	0	0	0.879971
1	188316	AATGACAACGA	0	0	0	0.0731895	0	0	0.856505
1	188446	TGGATGTCATC	0	0	0	0.292758	0	0	0.891704
1	189025	CATGACAATAA	0	0	0	0.297986	0	0	0.762642
1	189342	TATGACAACTT	0	0	0	0.088873	0	0	1.22023
1	189507	GATGACGCAAA	0	1	0	18.3444	0	0	1.60741
1	189525	AAATAGTCATC	0	1	0	18.2242	0	0	1.49008
1	189840	AATGACAAAAC	0	1	0	2.51981	0	0	1.1029
1	189958	TATATGTCATC	0	1	0	1.31741	0	0	0.973835
1	190017	CTAGAGTCATC	0	1	0	2.61914	0	0	0.762642
1	190039	CCGCGGTCATC	0	1	0	2.2166	0	0	0.71571
1	190426	TATGACGCGTA	0	0	0	3.26216	0	0	0.39892
1	191649	CATGACCAAGG	0	0	0	0.277075	0	0	0.281591
1	192817	TGGCTGTCATA	0	0	0	0.235252	0	0	0.586647
1	193246	GAGACGTCATC	0	0	0	0.172518	0	0	0.574915
1	193426	AAAGTGTCATC	0	0	0	0.559377	0	0	0.680511
1	193827	GGCTTGTCATC	0	0	0	0.172518	0	0	0.762642
1	193935	AATGACGATGA	0	1	0	7.0837	0	0	0.774375
1	193941	GATGACAGCAC	0	1	0	7.33464	0	0	0.750909
1	193983	TATGACGATAA	0	1	0	6.98437	0	0	0.703977
1	194010	AATGACGATGA	0	1	0	4.06202	0	0	0.692244
1	194199	GATGACGACGG	0	0	0	0.36072	0	0	0.739176
1	194474	AATGACCAAGC	0	0	0	0.0784174	0	0	0.633579
1	195396	GATTCGTCATT	0	0	0	0.350264	0	0	0.703977
1	196158	CATGACTTTAA	0	0	0	0.224796	0	0	0.645312
1	197325	TATTAGTCATA	0	1	0	19.8762	1	0	3.27349
1	198200	AATGACTTTAA	0	0	0	0.0731895	0	0	0.739176
1	198244	TAATTGTCATA	0	0	0	0.0313669	0	0	0.668778
1	199748	GTACAGTCATA	0	0	0	0	0	0	0.985568
1	200709	CATGACAGCAG	0	0	0	0	0	0	0.621846
1	201013	CATGACCCACC	0	0	0	0	0	0	0.797841
1	201157	TATGACTAAAG	0	0	0	0	0	0	0.821306
1	201238	AATTGGTCATC	0	0	0	0	0	0	0.938636
1	203407	AATGACAATGC	0	0	0	0.172518	0	0	0.786108
1	203824	AATGACAGGTT	0	0	0	0.12024	0	0	0.610113
1	204140	GATGACTTCGA	0	0	0	0.198657	0	0	0.621846
1	204173	GATGACCTAAG	0	0	0	0	0	0	0.633579
1	204286	AATGACCACCG	0	0	0	0.12024	0	0	0.774375
1	204327	AAACCGTCATT	0	0	0	0.135923	0	0	0.750909
1	204333	TCATTGTCATC	0	0	0	0.135923	0	0	0.762642
1	204603	TCATTGTCATC	0	0	0	0.141151	0	0	0.774375
1	204640	CATGACTACAA	0	0	0	0.141151	0	0	0.727443
1	204738	TCATTGTCATC	0	0	0	0.141151	0	0	0.879971
1	204775	CATGACTACAA	0	0	0	0.141151	0	0	0.879971
1	204873	TCATTGTCATC	0	0	0	0.141151	0	0	0.727443
1	204910	CATGACTACAA	0	0	0	0.141151	0	0	0.891704
1	205008	TCATTGTCATC	0	0	0	0.141151	0	0	0.71571
1	205045	CATGACTACAC	0	0	0	0.141151	0	0	0.610113
1	205096	AATGACCACCG	0	0	0	0.141151	0	0	0.938636
1	205143	TCATTGTCATC	0	0	0	0.141151	0	0	0.926903
1	205231	AATGACCACCG	0	0	0	0.141151	0	0	1.0677
1	205278	TCATTGTCATC	0	0	0	0.141151	0	0	1.1029
1	205366	AATGACCACCG	0	0	0	0.146379	0	0	1.47835
1	205413	TCATTGTCATC	0	0	0	0.146379	0	0	1.31409
1	205450	CATGACTACAA	0	0	0	0.146379	0	0	1.37276
1	205548	TCATTGTCATC	0	0	0	0.146379	0	0	0.950369
1	205585	CATGACTACAA	0	0	0	0.146379	0	0	1.00903
1	205636	AATGACCACCG	0	0	0	0.146379	0	0	0.727443
1	205677	AAACCGTCATT	0	0	0	0.198657	0	0	0.527983
1	205683	TCATTGTCATC	0	0	0	0.250936	0	0	0.527983
1	205771	GATGACCACCG	0	0	0	2.26888	0	0	0.59838
1	205906	AATGACCACCA	0	0	0	2.83348	0	0	0.563182
1	205947	AAACCGTCATT	0	0	0	2.83348	0	0	0.551449
1	205953	TCATTGTCATC	0	0	0	2.83348	0	0	0.563182
1	206041	AATGACCACCA	0	0	0	2.79166	0	0	0.551449
1	206176	AATGACGCACG	0	0	0	2.51458	0	0	0.351988
1	206217	AAACCGTCATT	0	0	0	2.51458	0	0	0.387187
1	206223	TCATTGTCATC	0	0	0	2.51458	0	0	0.410653
1	206446	AATGACCACCG	0	0	0	4.25022	0	0	0.481051
1	206622	AAACTGTCATT	0	0	0	1.63631	0	0	0.504517
1	206666	AGTTTGTCATC	0	0	0	2.34729	0	0	0.586647
1	206814	CTCCAGTCATT	0	0	0	0.219569	0	0	0.926903
1	206829	CCTCAGTCATT	0	0	0	0.16729	0	0	0.926903
1	206889	CATCCGTCATT	0	0	0	0.088873	0	0	0.962102
1	208962	AATGACTGATG	0	0	0	0.0313669	0	0	0.938636
1	210576	AGCCCGTCATT	0	0	0	0	0	0	0.610113
1	211903	ACTTTGTCATC	0	0	0	0.0836452	0	0	1.19676
1	211975	TATGACTTGGT	0	0	0	0.115012	0	0	1.17329
1	212018	GGTGGGTCATT	0	0	0	0.130696	0	0	1.14983
1	212150	AATGACAGGGT	0	0	0	0.0522782	0	0	0.973835
1	213534	TATGACTTACC	0	0	0	0.0627339	0	0	1.43142
1	214650	TAGCCGTCATC	0	0	0	0.0993287	0	0	1.26716
1	216037	AATGACTATTC	0	0	0	0.0365948	0	0	1.0325
1	216447	TTTTGGTCATA	0	0	0	0.0418226	0	0	0.985568
1	218047	AATGACATATG	0	0	0	0.0784174	0	0	0.962102
1	218315	TATGACTTCTG	0	0	0	0.135923	0	0	0.903437
1	218458	CAGAGGTCATA	0	0	0	0.0470504	0	0	1.1029
1	218553	AATGACAGGTT	0	0	0	0.663934	0	0	1.38449
1	218614	GATGACTCTGC	0	0	0	1.13967	0	0	1.57222
1	218869	GATGACTTTGA	0	0	0	0.135923	0	0	0.950369
1	219015	AATGACCACCG	0	0	0	0.412998	0	0	0.938636
1	219100	AGTTTGTCATC	0	0	0	1.11353	0	0	0.973835
1	219203	CCTCAGTCATG	0	0	0	0.522782	0	0	1.0325
1	219218	CCTCGGTCATT	0	0	0	0.470504	0	0	0.997301
1	219278	CATCCGTCATT	0	0	0	0.381631	0	0	0.926903
1	219346	GGCATGTCATT	0	0	0	0.209113	0	0	0.809573
1	220939	GGATCGTCATA	0	0	0	0.292758	0	0	1.36102
1	222089	TATGACGGTGT	0	0	0	1.06125	0	0	0.91517
1	222093	ACGGTGTCATC	0	0	0	1.11875	0	0	0.903437
1	222587	TCCAAGTCATA	0	1	0	6.86413	0	0	1.0677
1	223316	CATGACCATGG	0	0	0	0.423454	0	0	1.43142
1	223363	AATGTGTCATG	0	0	0	0.810313	0	0	1.74821
1	223601	ATGAAGTCATG	0	0	0	0.0941008	0	0	1.18503
1	223833	CATGACTTTAC	0	0	0	0.376403	0	0	0.668778
1	224403	GAAATGTCATT	0	0	0	0.0941008	0	0	0.891704
1	224986	AATGACAGAGA	0	0	0	0.345036	0	0	0.833039
1	225266	AATTGGTCATC	0	0	0	0.465276	0	0	1.19676
1	225728	CATGACAACAT	0	0	0	0.904414	0	0	0.821306
1	225795	GATGACTACGA	0	0	0	1.21808	0	0	0.950369
1	225986	CAGATGTCATG	0	0	0	0.146379	0	0	1.0325
1	226134	GATGACATTTT	0	0	0	0.669162	0	0	1.0677
1	226371	TATGACGTCGT	0	0	0	0.198657	0	0	0.680511
1	226518	GATGACAAAAA	0	0	0	0.177746	0	0	0.821306
1	226632	AATGACACCTA	0	0	0	0.465276	0	0	1.0677
1	226648	GATACGTCATC	0	0	0	0.449593	0	0	1.05597
1	226719	AATGACTTCTA	0	0	0	0.0575061	0	0	1.0325
1	226967	AATGACGATCA	0	0	0	0	0	0	0.868238
1	227659	TAACTGTCATA	0	0	0	0.00522782	0	0	0.903437
1	228288	AGGATGTCATG	0	0	0	0.151607	0	0	0.668778
1	228295	CATGACCAAAA	0	0	0	0.141151	0	0	0.645312
1	228564	ATGTCGTCATA	0	0	0	0.0209113	0	0	0.586647
1	228866	CATTGGTCATA	0	0	0	0.0313669	0	0	0.610113
2	701	CGCTCGTCATG	0	0	0	0.28753	0	0	3.05057
2	3793	CATGACATAAG	0	0	0	0.16729	0	0	2.12366
2	4172	CCGCGGTCATT	0	0	0	0.12024	0	0	1.36102
2	4778	CATGACGGAAA	0	0	0	0.0836452	0	0	2.05327
2	4878	AATGACCGCAC	0	0	0	0.151607	0	0	2.21753
2	6303	CATGACCCATC	0	1	0	1.11353	0	0	0.962102
2	6632	CATGACGTCAT	0	0	0	0.52801	0	0	0.891704
2	6633	ATGACGTCATT	0	0	0	0.533238	0	0	0.891704
2	7195	CATGACTTGTA	0	1	0	1.08216	0	0	1.40795
2	7329	GCGAAGTCATA	0	1	0	1.96043	0	0	1.11463
2	7463	ACACCGTCATT	0	0	0	0.12024	0	0	0.786108
2	8085	CATCTGTCATC	0	0	0	0.433909	0	0	0.868238
2	8731	TAAAAGTCATT	0	0	0	0.449593	0	0	1.17329
2	8931	GATGACATAAA	0	0	0	0.737123	0	0	1.16156
2	9010	AATGACAAAGT	0	0	0	0.329353	0	0	0.91517
2	9174	GATGACGCAAA	0	1	0	11.956	0	0	2.69858
2	9192	AAATAGTCATC	0	1	0	11.9979	0	0	2.79244
2	10003	AAGTAGTCATT	0	0	0	0.0993287	0	0	0.51625
2	10898	ATTGCGTCATT	0	1	0	4.48025	0	0	0.739176
2	10931	GCATAGTCATT	0	1	0	4.32864	0	0	0.739176
2	11371	AATGACAATGT	0	0	0	0.12024	0	0	0.610113
2	11636	CGAATGTCATT	0	0	0	0.261391	0	0	0.645312
2	11841	TGAAAGTCATC	0	0	0	0.261391	0	0	0.657045
2	11914	CATGACGCAAA	0	0	0	0.324125	0	0	0.774375
2	11962	AATGACCCTAA	0	0	0	0.0627339	0	0	0.71571
2	12534	CGATTGTCATC	0	0	0	0.0627339	0	0	0.563182
2	12710	TTTGTGTCATG	0	0	0	0.0470504	0	0	0.563182
2	13162	AATGACCTTTG	0	0	0	0.177746	0	0	0.844772
2	13276	TATGACTGTAA	0	0	0	1.48993	0	0	0.786108
2	13814	GAGACGTCATG	0	0	0	0.130696	0	0	0.692244
2	14233	CATGACCTTTT	0	0	0	0.0365948	0	0	0.457585
2	14613	TCTTCGTCATC	0	0	0	0.146379	0	0	0.551449
2	14815	TATGACCTTCT	0	0	0	0.0836452	0	0	0.610113
2	15102	TCGATGTCATG	0	0	0	0.0261391	0	0	0.610113
2	16002	GATGACCCCAA	0	0	0	0.0522782	0	0	0.739176
2	16141	CATGACACATT	0	0	0	1.51607	0	0	0.997301
2	16504	CATGACGATGT	0	0	0	0.104556	0	0	0.551449
2	16932	CACCTGTCATT	0	0	0	0.088873	0	0	0.71571
2	17118	ATTATGTCATT	0	0	0	0.130696	0	0	0.645312
2	17591	AATGACCATAA	0	0	0	0.088873	0	0	0.621846
2	17699	CATGACTGTAA	0	0	0	0.146379	0	0	0.692244
2	20211	TTTGTGTCATG	0	0	0	0.857363	0	0	0.739176
2	20259	TTATCGTCATC	0	0	0	1.0717	0	0	0.645312
2	20367	CATGACCACCT	0	0	0	0.277075	0	0	0.645312
2	20974	CATTTGTCATA	0	0	0	0.104556	0	0	0.821306
2	21264	TATGACCAATG	0	0	0	0.486188	0	0	0.762642
2	22121	GAGTTGTCATC	0	0	0	0.16729	0	0	0.985568
2	22218	GATGACTCTCC	0	0	0	0.925325	0	0	0.973835
2	22574	CCTAGGTCATC	0	0	0	0.0313669	0	0	0.797841
2	22752	TTTCAGTCATA	0	0	0	0.235252	0	0	1.05597
2	22847	AATGACGATGA	0	0	0	0.449593	0	0	1.14983
2	22947	TTGGTGTCATC	0	1	0	2.53027	0	0	1.16156
2	23015	ATTGTGTCATC	0	1	0	3.73789	0	0	1.29062
2	23042	AAAAAGTCATG	0	1	0	2.60868	0	0	1.25543
2	24573	CATGACGATTT	0	0	0	0.496643	0	0	0.692244
2	24644	TTGCCGTCATT	0	0	0	0.595972	0	0	0.809573
2	24979	ATTTCGTCATA	0	0	0	0.643022	0	0	0.821306
2	25255	GACCTGTCATT	0	0	0	0.230024	0	0	0.868238
2	25468	TCAGGGTCATA	0	0	0	0.230024	0	0	0.610113
2	25937	CATGACTTTTC	0	0	0	0.115012	0	0	0.727443
2	25955	TATGACCGGAT	0	0	0	0.141151	0	0	0.797841
2	26179	CTGTCGTCATC	0	0	0	0.146379	0	0	1.07943
2	26209	AGATTGTCATT	0	0	0	0.125468	0	0	1.04423
2	26533	TATGACAAAGA	0	0	0	0.256163	0	0	1.41969
2	27586	TCATCGTCATT	0	0	0	0.444365	0	0	0.739176
2	27799	TTATGGTCATC	0	0	0	0.470504	0	0	0.621846
2	29114	TATGACTTGGC	0	1	0	2.75506	0	0	0.797841
2	29357	CTATTGTCATT	0	0	0	0.261391	0	0	0.833039
2	29584	AATGACATGAA	0	1	0	0.920097	0	0	0.797841
2	29725	GATGACACAAA	0	1	0	10.6177	0	0	1.54875
2	29743	AAATAGTCATC	0	1	0	10.5707	0	0	1.65435
2	30209	GATGACTCCAA	0	1	0	0.318897	0	0	1.60741
2	30266	GATGACGTGTT	0	1	0	11.2921	0	0	2.14713
2	30560	AATGACTTATG	0	0	0	0.444365	0	0	1.1381
2	30966	TATGACGAAAA	0	0	0	0.172518	0	0	1.63088
2	31212	GATGACAACGA	0	1	0	2.54072	0	0	2.18233
2	31279	AATGACGAACT	0	1	0	0.76849	0	0	1.9594
2	32707	GAGCAGTCATA	0	0	0	0.543694	0	0	1.65435
2	32740	CATGACTATCA	0	0	0	0.517555	0	0	1.56048
2	33190	GATGACCGTTC	0	1	0	2.85962	0	0	1.0677
2	33811	AATGACATAGA	0	0	0	0.0784174	0	0	0.997301
2	33969	GATGACGTCAT	0	1	0	71.5898	0	0	2.69858
2	33970	ATGACGTCATT	0	1	0	71.7101	0	0	2.69858
2	33997	AATGACTATTA	0	1	0	67.3135	0	0	2.81591
2	34213	GGATGGTCATG	0	0	0	0.313669	0	0	1.75994
2	34521	ACCAGGTCATT	0	0	0	0.0784174	0	0	1.29062
2	34707	CATGACATATG	0	0	0	0.271847	0	0	2.85111
2	35193	GATGACAAAAC	0	0	0	0.235252	0	0	2.65165
2	35352	GATGACACAAA	0	1	0	10.5968	0	0	2.32312
2	35370	AAATAGTCATC	0	1	0	10.5916	0	0	2.42872
2	35948	GATTGGTCATA	0	1	0	29.0144	0	0	2.55778
2	35964	TATGACCAATA	0	1	0	30.5357	0	0	2.58125
2	36450	GTCAAGTCATC	0	0	0	0.0627339	0	0	0.973835
2	36683	CATTGGTCATA	0	0	0	0.230024	0	0	0.633579
2	36771	ATACTGTCATA	0	0	0	0.402543	0	0	0.809573
2	37835	CATGACGCCAT	0	0	0	0.188202	0	0	0.692244
2	37970	TATGACGATTT	0	0	0	0.418226	0	0	0.527983
2	38515	TAATGGTCATT	0	0	0	0.135923	0	0	1.05597
2	39100	AATGACAGTTA	0	0	0	0.109784	0	0	0.891704
2	39405	CATGACTTGAA	0	0	0	2.44139	0	0	0.938636
2	39578	AATCTGTCATT	0	0	0	0.773718	0	0	0.856505
2	39634	ATTTTGTCATA	0	0	0	0.778946	0	0	0.797841
2	39821	GCCTCGTCATA	0	0	0	0.339809	0	0	0.71571
2	40284	CATGACGTTAC	0	0	0	0.151607	0	0	0.692244
2	40835	GATGACTACAC	0	0	0	2.32638	0	0	0.692244
2	40866	GATGACGATGA	0	0	0	2.33161	0	0	0.645312
2	41007	TATGACTTGGA	0	0	0	0.130696	0	0	0.762642
2	41181	GATGACAGTAA	0	0	0	1.02465	0	0	0.891704
2	41476	CAAGAGTCATT	0	1	1	2.02317	0	0	1.79514
2	41577	GATGACGAAAA	0	1	1	21.1361	0	0	1.66608
2	41595	AGCCAGTCATT	0	1	1	26.6515	0	0	1.68954
2	41619	AATGACTCAAC	1	0	1	27.3572	0	0	1.66608
2	41928	CATGACAATAC	0	0	0	0.993287	0	0	0.809573
2	42333	GATGACTTCCA	0	0	0	0.522782	0	0	0.91517
2	42401	GTTCAGTCATA	0	0	0	0.444365	0	0	1.0677
2	42618	GATGACATGGA	0	0	0	0.559377	0	0	0.727443
2	42702	GATGACGAAGA	0	0	0	0.376403	0	0	0.668778
2	42828	CATGACAGTAG	0	0	0	0.486188	0	0	0.563182
2	42861	AATGACAGTGA	0	0	0	0.512327	0	0	0.563182
2	43047	AATGACTTGAT	0	0	0	1.50561	0	0	0.844772
2	43089	GCAGCGTCATA	0	0	0	1.3331	0	0	0.821306
2	43242	AATGACCAAAT	0	0	0	0.104556	0	0	0.422386
2	43250	AATGACAGGAT	0	0	0	0.130696	0	0	0.469318
2	43738	TTGTTGTCATT	0	0	0	0.454821	0	0	0.574915
2	44290	CATGACTGTCA	0	0	0	0.381631	0	0	0.551449
2	44478	TATGACCTTTC	0	0	0	0.130696	0	0	0.610113
2	44793	GAGATGTCATC	0	0	0	0.245708	0	0	0.574915
2	45900	AACCAGTCATT	0	0	0	0.0941008	0	0	1.1381
2	46033	CAAGCGTCATC	0	0	0	0.653478	0	0	1.09116
2	46296	GAGTTGTCATT	0	0	0	0.292758	0	0	1.24369
2	46447	CATGACTTTTA	0	0	0	0.0104556	0	0	0.574915
2	46742	ACTATGTCATC	0	0	0	0.19343	0	0	0.739176
2	47218	CTGTCGTCATA	0	0	0	0.266619	0	0	0.586647
2	47369	CAGTAGTCATC	0	0	0	0.475732	0	0	0.657045
2	48624	CGTCTGTCATT	0	0	0	0.0313669	0	0	0.868238
2	48761	ACCAGGTCATT	0	0	0	0.0104556	0	0	0.633579
2	49470	TATGACTTCAC	0	0	0	0.12024	0	0	0.410653
2	50358	TATGACATTTG	0	0	0	2.66619	0	0	0.71571
2	51976	AAATCGTCATT	0	0	0	0.580289	0	0	0.797841
2	52321	CCCCTGTCATA	0	0	0	0.115012	0	0	0.868238
2	52438	AGGGAGTCATA	0	1	0	2.67142	0	0	1.22023
2	52606	CTATTGTCATC	0	0	0	0.52801	0	0	0.809573
2	52648	ATAATGTCATT	0	0	0	0.538466	0	0	0.692244
2	52879	TATGACCTATG	0	0	0	0.141151	0	0	0.891704
2	53119	AAATCGTCATA	0	0	0	0.0627339	0	0	0.504517
2	54052	TCGCCGTCATT	0	0	0	0.177746	0	0	0.645312
2	56204	AGTATGTCATC	0	0	0	0.16729	0	0	0.574915
2	57565	TCTGGGTCATA	0	0	0	0.0784174	0	0	0.844772
2	58702	AATGACATTAT	0	0	0	0.0784174	0	0	0.539716
2	59935	GATGACACCAG	0	0	0	0.36072	0	0	1.58395
2	60980	GATGACGGTTG	0	0	0	0.156835	0	0	0.457585
2	61340	TCCTCGTCATT	0	1	0	15.7776	0	0	0.985568
2	61386	TATGACTCCAA	0	1	0	14.7477	0	0	1.11463
2	61439	TAGCCGTCATC	0	1	0	3.11056	0	0	1.00903
2	61737	TTGTTGTCATT	0	0	0	0.156835	0	0	0.574915
2	62728	ACTTGGTCATC	0	0	0	0.24048	0	0	0.563182
2	63202	CATGACTTAAC	0	1	0	2.89099	0	0	1.04423
2	63214	GTACAGTCATG	0	1	0	2.89099	0	0	1.0677
2	63999	TTAAAGTCATT	0	0	0	0.235252	0	0	0.750909
2	64028	AATGACGGCTG	0	0	0	0.256163	0	0	0.762642
2	64418	CATGACTCGTT	0	0	0	0.423454	0	0	0.680511
2	65011	TATGACAGAAG	0	0	0	0.0313669	0	0	0.692244
2	65278	GAATGGTCATG	0	0	0	0.491416	0	0	0.926903
2	65285	CATGACTCGAA	0	0	0	0.517555	0	0	0.903437
2	65731	GATGACTTCCC	0	0	0	0.271847	0	0	0.809573
2	66582	TCCCTGTCATT	0	0	0	0.271847	0	0	0.692244
2	66713	GATGACACCCA	0	0	0	0.0993287	0	0	0.727443
2	67185	TATGACATTTT	0	0	0	0.245708	0	0	0.59838
2	67377	ATCTTGTCATG	0	0	0	0.135923	0	0	0.797841
2	67440	AATGACATGCT	0	0	0	0.109784	0	0	0.739176
2	67704	CATGACCTTGC	0	0	0	0.115012	0	0	0.692244
2	67883	ACCTTGTCATG	0	0	0	0.0731895	0	0	0.739176
2	68108	GATGACGACCT	0	0	0	0.277075	0	0	0.59838
2	68796	TATGACTATTA	0	0	0	1.66245	0	0	2.12366
2	70411	TTCGCGTCATT	0	0	0	0.951464	0	0	0.586647
2	71325	AAAGAGTCATG	0	1	0	3.58106	0	0	0.91517
2	72180	AATGACGTACC	0	0	0	0.088873	0	0	0.610113
2	72567	TCGTCGTCATC	0	0	0	0.533238	0	0	0.492784
2	73214	AAAGTGTCATC	0	0	0	2.52504	0	0	0.786108
2	73237	AATGACATCAT	0	0	0	2.50936	0	0	0.821306
2	74064	AATGACGTACC	0	0	0	0.0575061	0	0	0.71571
2	74492	GCTATGTCATA	0	0	0	0.350264	0	0	0.668778
2	75852	AATGACAATGA	0	0	0	0.188202	0	0	0.527983
2	76167	GATGACTGGTT	0	0	0	0.40777	0	0	0.833039
2	76684	CTGAAGTCATC	0	0	0	0.12024	0	0	0.71571
2	76869	ATCAAGTCATC	0	0	0	0.088873	0	0	0.71571
2	77547	GATGACGTAAT	0	0	0	0.313669	0	0	0.891704
2	77633	CATGACTTTTA	0	0	0	0.19343	0	0	0.692244
2	78129	AATGACAAAAC	0	0	0	0.109784	0	0	0.750909
2	78576	TATGACCTAGT	0	0	0	0.752807	0	0	0.891704
2	78627	AAACAGTCATC	0	0	0	1.47947	0	0	1.0325
2	78666	AATGACGATGA	0	0	0	1.08739	0	0	0.91517
2	79604	AATGACCTGGT	0	0	0	0.0575061	0	0	0.551449
2	80959	CATGACTCTAA	0	0	0	2.25842	0	0	1.07943
2	81076	ATGGTGTCATT	0	0	0	0.350264	0	0	0.973835
2	81124	GAGCCGTCATA	0	0	0	0.271847	0	0	0.950369
2	81705	GATGACCAAAG	0	1	0	11.2712	0	0	1.73648
2	82191	CATGACATTAT	0	0	0	0.345036	0	0	0.786108
2	82497	GATGACGTTCT	0	0	0	0.19343	0	0	0.891704
2	82752	AATGACATCAC	0	0	0	0.909641	0	0	0.774375
2	83197	CCAAGGTCATC	0	0	0	0.517555	0	0	0.938636
2	83238	TATGACGCCGT	0	0	0	0.595972	0	0	0.938636
2	83888	CATAAGTCATA	0	0	0	1.44811	0	0	0.879971
2	83944	AAGACGTCATC	0	0	0	1.4847	0	0	0.903437
2	84041	GGCCTGTCATG	0	0	0	0.449593	0	0	1.19676
2	84095	TATGACCGTAA	0	0	0	0.282303	0	0	1.39622
2	84360	TAAGAGTCATC	0	1	0	6.5191	1	0	5.43236
2	84419	TTTTCGTCATC	0	1	0	2.61391	1	0	3.62548
2	84632	ATTTCGTCATT	0	0	0	0.0784174	0	0	0.680511
2	85223	GCTTAGTCATT	0	0	0	0.198657	0	0	0.703977
2	86779	TCCTCGTCATC	0	0	0	0.679617	0	0	0.750909
2	86905	AATGACGAATA	0	0	0	0.203885	0	0	0.821306
2	87356	CTGTGGTCATC	0	0	0	0.130696	0	0	0.821306
2	87663	AATGACATGAA	0	0	0	0.277075	0	0	0.657045
2	88313	TATGACCTTGC	0	0	0	0.088873	0	0	1.00903
2	89154	AATGACGCTTG	0	0	0	0.0836452	0	0	1.23196
2	89428	TATGACCATAG	0	0	0	0.904414	0	0	1.29062
2	89992	TATGACGAAAT	0	1	0	3.86336	0	0	0.481051
2	90015	TATGACGTTTG	0	1	0	3.21511	0	0	0.539716
2	90088	GATGACATGTT	0	0	0	0.318897	0	0	0.797841
2	90280	TATGACTTAGC	0	0	0	0.135923	0	0	0.645312
2	91383	TGTTTGTCATA	0	0	0	1.91861	0	0	1.0677
2	91402	GAAGCGTCATT	0	0	0	1.9343	0	0	1.0325
2	91672	TTTGAGTCATT	1	0	1	11.2921	0	0	1.25543
2	91814	ATCTGGTCATA	0	0	0	0.198657	0	0	1.00903
2	91946	TATGACTGGAA	0	0	0	0.36072	0	0	0.844772
2	92290	TCTCGGTCATT	0	0	0	0.0784174	0	0	0.51625
2	92333	ATATGGTCATC	0	0	0	0.115012	0	0	0.504517
2	92819	ATCATGTCATC	0	0	0	0.0679617	0	0	0.797841
2	93364	TCCGTGTCATA	0	0	0	0.334581	0	0	0.703977
2	93975	GTTTCGTCATC	0	0	0	0.16729	0	0	0.926903
2	96448	GTGTGGTCATC	0	0	0	0.172518	0	0	0.445852
2	96711	AAAAAGTCATC	0	0	0	0.0941008	0	0	0.539716
2	96970	AATCTGTCATA	0	0	0	0.271847	0	0	0.750909
2	97344	GATATGTCATT	0	0	0	0.141151	0	0	0.703977
2	97602	TCAAAGTCATC	0	0	0	0.0679617	0	0	0.574915
2	98520	ATACTGTCATT	0	0	0	0.700529	0	0	0.739176
2	99399	GCTGAGTCATT	1	0	0	1.81928	0	1	2.66338
2	99481	GCAACGTCATG	0	0	0	1.1658	1	1	1.80687
2	99750	ACGCTGTCATT	0	0	0	0.151607	0	0	0.539716
2	99979	GATGACTGTCA	0	0	0	0.988059	0	0	0.750909
2	99981	TGACTGTCATC	0	0	0	0.988059	0	0	0.739176
2	100118	CATGACGAGAA	0	0	0	0.19343	0	0	0.739176
2	100469	AATGACATCGT	0	0	0	0.230024	0	0	0.950369
2	100622	GATGACGAAAA	0	0	0	0.512327	0	0	0.962102
2	103021	TATGACGAAAA	0	0	0	0.224796	0	0	0.621846
2	103491	ATGAAGTCATA	0	0	0	0.0784174	0	0	0.610113
2	104576	ATCATGTCATT	0	0	0	0.12024	0	0	0.469318
2	105191	AATGACATACT	0	0	0	0.0522782	0	0	0.610113
2	106197	AATGACAACAT	0	0	0	0.182974	0	0	0.574915
2	106493	TATGACCATGC	0	0	0	0.104556	0	0	0.750909
2	107628	GATGACCTTTC	0	0	0	0.266619	0	0	0.469318
2	107661	TGAAAGTCATA	0	0	0	0.355492	0	0	0.481051
2	107967	AATGACACCTA	0	0	0	0.392087	0	0	0.668778
2	108000	AATGACAATTT	0	0	0	0.386859	0	0	0.71571
2	108129	AATGACGAAAA	0	0	0	0.224796	0	0	0.692244
2	108224	GAATAGTCATC	0	0	0	0.36072	0	0	0.833039
2	108501	TATAAGTCATG	0	0	0	0.266619	0	0	0.633579
2	108506	GTCATGTCATA	0	0	0	0.261391	0	0	0.668778
2	108975	GATGACGGTTT	0	0	0	0.0418226	0	0	0.868238
2	109097	AATGACCTCTA	0	0	0	0.0313669	0	0	0.750909
2	109888	AAGCAGTCATG	0	0	0	0.182974	0	0	0.762642
2	110280	AATGACAGCAC	0	0	0	0.188202	0	0	0.727443
2	110805	GATGACACGAT	0	0	0	0.203885	0	0	0.563182
2	111051	CATGACACTAG	0	0	0	0.308442	0	0	0.797841
2	111577	GATGACCAAAA	0	0	0	0.156835	0	0	0.668778
2	111856	GATGACGATGA	0	0	0	0.115012	0	0	0.680511
2	112009	GATGACGAAGA	0	0	0	0.198657	0	0	0.833039
2	113027	TTTGTGTCATA	0	1	0	2.82303	0	0	0.739176
2	113086	CATGACAATGC	0	1	0	3.72744	0	0	0.680511
2	113126	CCTTTGTCATG	0	1	0	2.72892	0	0	0.750909
2	113254	TCAGTGTCATT	0	1	0	1.15012	0	0	0.903437
2	113414	AAACTGTCATC	0	0	0	0.219569	0	0	0.926903
2	113949	TGACGGTCATG	0	0	0	0.109784	0	0	0.739176
2	114109	GATGACCATAG	0	0	0	0.0627339	0	0	0.762642
2	114226	GCAATGTCATT	0	0	0	0.12024	0	0	0.739176
2	114537	TATGACGTTGA	0	0	0	0.758035	0	0	1.65435
2	114832	AATGACGACAT	0	0	0	0.19343	0	0	1.14983
2	116747	TTGATGTCATG	0	0	0	0.235252	0	0	0.574915
2	117500	CTTGAGTCATT	1	0	1	3.94701	0	0	0.856505
2	117593	GATGACGTTGC	0	1	1	1.95521	0	0	0.657045
2	118716	AATGACAAAAT	0	0	0	0.209113	0	0	0.739176
2	118977	GATGACATTGA	0	0	0	0.6012	0	0	0.786108
2	119093	TATGACCAGCG	0	0	0	0.371176	0	0	1.0677
2	119106	AATGACATACG	0	0	0	0.350264	0	0	1.05597
2	119388	TCTTCGTCATC	0	0	0	0.454821	0	0	0.504517
2	119568	TCAATGTCATC	0	1	0	2.3682	0	0	0.786108
2	120141	AATGACGGCCC	0	0	0	0.115012	0	0	0.879971
2	120174	AGTTTGTCATA	0	0	0	0.125468	0	0	0.950369
2	120636	TTATAGTCATT	0	0	0	0.088873	0	0	0.844772
2	120943	GAGAAGTCATA	0	0	0	0.0261391	0	0	0.680511
2	121466	TATGACTGAAG	0	0	0	0.789402	0	0	0.844772
2	121872	AATGACATTAT	0	0	0	0.203885	0	0	0.727443
2	123445	GATGACATTGT	0	0	0	0.266619	0	0	0.739176
2	123621	CAGATGTCATT	0	0	0	0.156835	0	0	0.59838
2	123854	TCAGGGTCATT	0	0	0	0.088873	0	0	0.59838
2	124193	GATGACGATCT	0	0	0	0.104556	0	0	0.574915
2	124676	TCCTGGTCATT	0	0	0	0.156835	0	0	0.610113
2	125639	CATGACTATGC	0	0	0	0.0731895	0	0	0.692244
2	126249	GATGACTTAGA	0	0	0	0.271847	0	0	0.71571
2	127129	TCTTTGTCATT	0	0	0	1.17626	0	0	0.657045
2	128297	AGTTCGTCATC	0	0	0	0.182974	0	0	0.821306
2	128533	TATGACTTGTT	0	0	0	0.0784174	0	0	0.797841
2	129683	TGGTAGTCATT	0	0	0	0.0627339	0	0	0.739176
2	129867	AGGCTGTCATC	0	0	0	0.951464	0	0	0.833039
2	130073	TTTTGGTCATG	0	0	0	0.109784	0	0	0.692244
2	130166	TTTTTGTCATT	0	0	0	0.0784174	0	0	0.680511
2	132941	GATGACCGAAA	0	0	0	0.172518	0	0	0.703977
2	133020	GATGACGAGGA	0	0	0	0.731895	0	0	0.739176
2	133227	GATGACGATGA	0	1	0	15.26	0	0	0.657045
2	133233	GATGACAACGA	0	1	0	15.9187	0	0	0.645312
2	133308	GATGACGATGA	0	1	0	14.1099	0	0	0.59838
2	133323	GATGACGAAGA	0	1	0	10.372	0	0	0.586647
2	133428	TATGACGAATC	0	0	0	0.460049	0	0	0.574915
2	133761	GATGACTTCTC	0	0	0	0.125468	0	0	0.59838
2	134359	TTAGCGTCATT	0	0	0	0.209113	0	0	0.938636
2	136559	TATGACCAAAG	0	0	0	0.0731895	0	0	0.657045
2	136963	AATGACGTCGG	0	0	0	0.297986	0	0	1.1029
2	137380	GATGACAGCGA	0	0	0	0.533238	0	0	0.950369
2	137736	TATTAGTCATT	0	0	0	0.512327	1	0	3.25003
2	139178	GATGACTTGTA	0	0	0	0.141151	0	0	0.703977
2	139267	AATGACAGACC	0	0	0	0.381631	0	0	0.703977
2	139307	CCATTGTCATT	0	0	0	0.418226	0	0	0.762642
2	139335	AATGACCTTTG	0	0	0	0.297986	0	0	0.762642
2	139416	TATGACGCAAT	0	0	0	0.454821	0	0	0.821306
2	139624	CATGACGACAC	0	0	0	0.575061	0	0	0.739176
2	139639	GATGACAATCC	0	0	0	0.543694	0	0	0.750909
2	140009	GTAGAGTCATT	0	0	0	1.28604	0	0	1.18503
2	140063	TTTTCGTCATC	0	0	0	1.25991	0	0	1.04423
2	140119	AATGACATTAG	0	0	0	0.256163	0	0	0.938636
2	140416	AGCATGTCATC	0	0	0	0.130696	0	0	0.985568
2	141454	ACATAGTCATG	0	0	0	0.449593	0	0	0.739176
2	141841	AAGAAGTCATC	0	0	0	0.19343	0	0	0.739176
2	142147	GATGACTTTAG	0	0	0	0.0470504	0	0	0.786108
2	143518	TTCATGTCATC	0	0	0	0.235252	0	0	0.680511
2	144042	AATGACATCTT	0	0	0	0.0679617	0	0	0.657045
2	144458	AATGACTGTCT	0	0	0	0.0941008	0	0	0.680511
2	145034	CATGACAAAAC	0	0	0	0.135923	0	0	0.786108
2	145176	GATGACAGGAA	0	0	0	0.0941008	0	0	0.668778
2	145324	CCGGTGTCATC	0	0	0	0.318897	0	0	0.762642
2	145701	AATGACACCAC	0	0	0	0.198657	0	0	0.739176
2	146506	CAATGGTCATT	0	0	0	0.402543	0	0	0.680511
2	147055	CATGACGACGT	0	0	0	0.0836452	0	0	0.375454
2	147561	TATGACCCTTG	0	0	0	0.0784174	0	0	0.586647
2	147802	GCATTGTCATT	0	0	0	0.130696	0	0	0.657045
2	149063	CCAACGTCATC	0	0	0	0.130696	0	0	0.504517
2	149871	CATGACTACAA	0	0	0	0.297986	0	0	0.633579
2	150676	CAATAGTCATT	0	0	0	0.376403	0	0	0.727443
2	150734	GATGACTTCAA	0	0	0	0.250936	0	0	0.657045
2	151978	TATGACTTCCT	0	0	0	0.188202	0	0	0.703977
2	153592	GATGACATCGA	0	0	0	0.632567	0	0	0.762642
2	154448	GGCGTGTCATC	0	0	0	0.266619	0	0	1.02077
2	154524	AATCGGTCATT	0	0	0	0.156835	0	0	0.973835
2	154692	GATGACTAATT	0	1	0	5.90221	0	0	1.66608
2	155151	TTTTCGTCATT	0	0	0	0.402543	0	0	0.610113
2	155177	TCTTTGTCATT	0	0	0	0.52801	0	0	0.703977
2	155289	TCATTGTCATT	0	0	0	0.24048	0	0	0.71571
2	155451	CATGACAGATT	0	0	0	0.088873	0	0	0.821306
2	156017	GATGACTGTTG	0	0	0	0.12024	0	0	0.985568
2	156164	GATGACATCGA	0	0	0	0.329353	0	0	0.727443
2	156260	GGAAAGTCATC	0	0	0	0.16729	0	0	0.774375
2	156386	ATACTGTCATG	0	0	0	0.156835	0	0	0.821306
2	156484	TATGACACTTC	0	0	0	2.20614	0	0	0.821306
2	157138	AATGACAAATA	0	0	0	0.141151	0	0	0.586647
2	157682	TTTTCGTCATC	0	0	0	0.261391	0	0	0.750909
2	158072	AGAGTGTCATT	0	0	0	0.402543	0	0	0.856505
2	158683	GATGACAACGC	0	0	0	0.318897	0	0	0.809573
2	158777	AATGACCCATT	0	0	0	0.250936	0	0	0.962102
2	159689	CTATGGTCATC	0	1	1	10.0165	1	1	2.1002
2	159739	AATGACTCAAT	1	0	1	11.679	0	1	2.34659
2	160333	TTGCTGTCATT	0	0	0	0.177746	0	0	0.492784
2	161080	GATGACGATGA	0	0	0	0.141151	0	0	0.563182
2	162211	AATGACATAGT	0	0	0	0.486188	0	0	0.492784
2	162762	GATGACATTTA	0	0	0	0.0731895	0	0	0.657045
2	163225	CGGAGGTCATC	0	0	0	0.230024	0	0	0.879971
2	163578	AATGACAAGGC	0	0	0	0.381631	0	0	0.739176
2	164532	AATGACTTTAT	0	0	0	0.198657	0	0	0.750909
2	164548	TGTTCGTCATT	0	0	0	0.209113	0	0	0.809573
2	164770	AATGACATGGT	0	0	0	0.28753	0	0	0.692244
2	165200	ACGGAGTCATT	0	0	0	0.548922	0	0	1.43142
2	166259	AATGACATCAA	0	0	0	0.40777	0	0	1.0325
2	166445	AATGACATCAG	0	0	0	0.177746	0	0	0.809573
2	166550	CCTTCGTCATT	0	0	0	0.125468	0	0	1.00903
2	166882	GCCCTGTCATG	0	0	0	0.28753	0	0	0.703977
2	167813	GATGACTGCTA	0	0	0	1.1083	0	0	0.797841
2	167891	GGTTTGTCATC	0	0	0	0.292758	0	0	0.574915
2	168491	TGAATGTCATC	0	0	0	0.141151	0	0	0.868238
2	169569	TCGTAGTCATC	0	0	0	0.292758	0	0	0.868238
2	169809	CATGACTATCA	0	0	0	0.559377	0	0	0.809573
2	170174	ATCTTGTCATT	0	0	0	0.0679617	0	0	0.551449
2	170282	ATATTGTCATC	0	0	0	0.0522782	0	0	0.610113
2	171025	AATGACTGAAA	0	0	0	0.28753	0	0	0.962102
2	171220	AAGTGGTCATC	0	0	0	0.12024	0	0	0.59838
2	171359	CGAATGTCATG	0	0	0	0.0575061	0	0	0.457585
2	172367	AATGACGTACT	0	0	0	0.146379	0	0	0.445852
2	172593	GATGACTCGAG	0	0	0	0.224796	0	0	0.774375
2	173220	CATGACGCCCA	0	0	0	0.177746	0	0	0.739176
2	173604	TATGACAGAAA	0	0	0	0.0836452	0	0	0.809573
2	174078	AATGACGATAG	0	0	0	0.177746	0	0	0.762642
2	174314	GATGACAAAAT	0	0	0	0.303214	0	0	0.750909
2	174360	AATGACCCTGC	0	0	0	0.172518	0	0	0.833039
2	175104	AATGACGAACT	0	0	0	0.0731895	0	0	0.504517
2	176007	TATGACCATAG	0	0	0	0.104556	0	0	0.59838
2	176305	AATGACTTCTC	0	0	0	0.0522782	0	0	0.821306
2	177029	AGATCGTCATC	0	0	0	1.07693	0	0	0.739176
2	177134	TCCTCGTCATC	0	0	0	0.496643	0	0	0.774375
2	178157	CACCGGTCATC	0	0	0	0.303214	0	0	0.856505
2	178615	TCAATGTCATC	0	0	0	0.125468	0	0	0.610113
2	178732	GATGACGTTGG	0	0	0	0.162063	0	0	0.692244
2	178871	CTTCTGTCATA	0	0	0	0.182974	0	0	0.703977
2	178983	AATGACTTCCA	0	0	0	0.172518	0	0	0.71571
2	179270	TATGACCTTTT	0	0	0	0.156835	0	0	0.727443
2	179291	CGTCCGTCATA	0	0	0	0.16729	0	0	0.703977
2	179671	AATGACTTGAT	0	0	0	0.214341	0	0	0.727443
2	179896	GATGACAGTAT	0	0	0	0.198657	0	0	0.703977
2	180470	GAGCAGTCATT	0	0	0	0.135923	0	0	0.750909
2	180814	GATGACTGTCC	0	0	0	0.0993287	0	0	0.59838
2	182676	GATGACGACGA	0	0	0	0.19343	0	0	0.551449
2	184355	ACTATGTCATC	0	0	0	0.28753	0	0	0.633579
2	185598	CAAAAGTCATG	0	0	0	0.0575061	0	0	0.657045
2	185681	GATGACAGGAT	0	0	0	0.12024	0	0	0.610113
2	186055	AGGCGGTCATC	0	0	0	0.115012	0	0	0.586647
2	186302	TCCATGTCATT	0	0	0	0.460049	0	0	0.657045
2	186569	GATGACTTATG	0	1	0	4.5273	0	0	0.563182
2	186589	TATGACGTTCT	0	1	0	4.73118	0	0	0.574915
2	187033	GATAAGTCATT	0	0	0	0.418226	0	0	0.774375
2	187066	AGCAGGTCATC	0	0	0	0.324125	0	0	0.786108
2	187336	CCTCTGTCATA	0	0	0	0.19343	0	0	0.856505
2	189017	CATGACATTCC	0	1	1	14.2981	0	0	1.75994
2	189134	TAGCAGTCATA	0	0	0	1.21286	0	0	1.56048
2	189461	TGACTGTCATT	0	0	0	0.219569	0	0	0.774375
2	190178	CTGTTGTCATT	0	0	0	0.308442	0	0	0.833039
2	191122	TCATTGTCATT	0	0	0	0.188202	0	0	0.71571
2	191260	CATGACTTACC	0	0	0	0.156835	0	0	0.645312
2	191320	GCTCTGTCATG	0	0	0	0.235252	0	0	0.703977
2	191596	GATGACTACTG	0	0	0	0.381631	0	0	0.692244
2	192847	CGAACGTCATC	0	0	0	0.329353	0	0	0.492784
2	192989	CATGACCGAGT	0	0	0	0.329353	0	0	0.363721
2	193594	TATGACATACG	0	0	0	1.74087	0	0	0.610113
2	193910	GATGACCACTG	0	0	0	0.595972	0	0	0.539716
2	194126	AATGACAATTT	0	0	0	0.12024	0	0	0.539716
2	194876	TGCAGGTCATT	0	0	0	0.135923	0	0	0.71571
2	194974	ACGCTGTCATT	0	0	0	0.24048	0	0	0.621846
2	195214	TGGGTGTCATC	0	0	0	0.580289	0	0	0.621846
2	195441	CATGACCTGGA	0	0	0	0.172518	0	0	0.504517
2	195861	CATGACGTCTA	0	0	0	0.177746	0	0	0.668778
2	195957	TGAAAGTCATC	0	0	0	0.146379	0	0	0.739176
2	195999	GATGACGTCAG	0	0	0	0.19343	0	0	0.739176
2	196465	CATGACACTCA	0	0	0	0.235252	0	0	0.750909
2	196734	ATACAGTCATG	0	0	0	0.533238	0	0	0.657045
2	197244	GATGACTGTTT	0	1	0	13.8224	0	0	1.32582
2	197261	TCCATGTCATT	0	1	0	13.446	0	0	1.31409
2	197747	TATGACAATAC	0	0	0	2.4048	0	0	2.69858
2	197753	AATACGTCATC	0	0	0	2.36298	0	0	2.72204
2	198823	CTCCGGTCATA	0	0	0	0.24048	0	0	0.786108
2	199182	CTGGTGTCATT	0	0	0	0.209113	0	0	0.739176
2	200675	CATGACGATAA	0	0	0	0.0418226	0	0	0.762642
2	200899	CATGACATCAC	0	0	0	0.146379	0	0	0.59838
2	204637	TATGACACAAT	0	0	0	0.517555	0	0	0.750909
2	204999	ACGATGTCATT	0	0	0	0.130696	0	0	0.457585
2	205359	TCGACGTCATC	0	0	0	0.24048	0	0	0.833039
2	205454	GATTCGTCATC	0	0	0	1.36446	0	0	0.786108
2	206423	TTAAAGTCATT	0	0	0	0.0731895	0	0	0.809573
2	206685	AATGACATGGG	0	0	0	0.96192	0	0	1.1381
2	206728	AAACAGTCATT	0	0	0	0.956692	0	0	1.25543
2	206845	TAGAGGTCATT	0	0	0	0.0575061	0	0	0.973835
2	207228	GATGACTGACA	0	0	0	0.669162	0	0	0.786108
2	207895	AATGACCAAGA	0	0	0	0.0993287	0	0	0.621846
2	208384	GCTCAGTCATT	0	0	0	1.06648	0	0	0.703977
2	208633	AATGACCAAAA	0	0	0	0.088873	0	0	0.621846
2	210133	GATCTGTCATA	0	0	0	2.06499	0	0	0.727443
2	210479	AATTGGTCATG	0	0	0	0.156835	0	0	0.645312
2	210564	GATGACCCAGA	0	0	0	0.104556	0	0	0.668778
2	210774	GTTGCGTCATT	0	0	0	0.182974	0	0	0.809573
2	211497	AATGACTTTCA	0	0	0	0.282303	0	0	0.692244
2	211511	GATGACTTTGA	0	0	0	0.292758	0	0	0.680511
2	211585	CCGATGTCATA	0	0	0	0.28753	0	0	0.59838
2	212452	TATGACAATAA	0	0	0	0.104556	0	0	0.833039
2	212870	AAGTAGTCATC	0	0	0	1.24422	0	0	0.844772
2	213290	GTTGGGTCATC	0	0	0	0.329353	0	0	0.645312
2	215278	ATGAAGTCATA	0	0	0	0.256163	0	0	0.856505
2	215680	TCATCGTCATT	0	0	0	1.68336	0	0	0.71571
2	216079	AAAACGTCATT	0	0	0	0.292758	0	0	0.809573
2	216225	AATGACTCTTT	0	0	0	1.81928	0	0	1.61915
2	216362	ACACAGTCATA	0	0	0	1.55789	0	0	1.39622
2	217070	GATGACTTTTC	0	0	0	0.679617	0	0	0.621846
2	217100	AGTACGTCATA	0	0	0	0.883502	0	0	0.680511
2	217931	GATGACACTCA	0	0	0	0.507099	0	0	0.703977
2	218095	CATGACGAGGT	0	0	0	0.0418226	0	0	0.621846
2	218460	ATTTAGTCATT	0	0	0	0.967148	0	0	1.0677
2	218666	TTCTCGTCATT	0	0	0	0.454821	0	0	0.985568
2	218777	TTAGTGTCATT	0	0	0	0.28753	0	0	0.879971
2	219098	TCACCGTCATC	0	0	0	0.402543	0	0	0.621846
2	219122	AACTTGTCATT	0	0	0	0.418226	0	0	0.59838
2	220091	TATGACAGTAC	0	0	0	0.271847	0	0	0.973835
2	220376	AATGACAATAC	0	0	0	1.08216	0	0	0.962102
2	220507	TCCTCGTCATT	0	0	0	0.209113	0	0	0.774375
2	220985	TATGACTTCTA	0	0	0	0.0836452	0	0	0.750909
2	221119	GATGACATAAG	0	1	0	9.57215	0	0	1.85381
2	221137	AAGCTGTCATC	0	1	0	9.72375	0	0	1.889
2	221817	TATGACATCCA	0	1	1	5.3742	0	0	4.32946
2	221869	AATGACTTTCT	0	1	1	1.53175	0	0	4.22386
2	221967	GATGACTGATG	0	1	0	5.88653	0	0	4.85744
2	221974	GATGACGAACT	0	1	0	5.87607	0	0	4.78704
2	222133	AATGACATTAC	0	0	0	0.297986	0	0	2.05327
2	222312	CGCACGTCATC	0	0	0	1.53175	0	0	0.926903
2	222333	TATGACAGTTG	0	0	0	1.63631	0	0	1.0325
2	222905	TATGACTTACT	0	0	0	0.825996	0	0	4.59932
2	223673	GATGACTGCCG	0	0	0	0.162063	0	0	4.43505
2	224147	CATGACTTTCA	0	0	0	0.76849	0	0	1.85381
2	225152	TATGACAGAAA	0	0	0	0.392087	0	0	2.73378
2	225319	AATGACATCCC	0	1	0	2.70279	0	0	3.39082
2	225563	GGATGGTCATG	0	0	0	0.465276	0	0	2.34659
2	225731	TATGACATTCT	0	0	0	0.151607	0	0	2.40525
2	226057	TATGACATATG	0	0	0	0.486188	0	0	2.67511
2	226543	AATGACCAAAC	0	0	0	0.177746	0	0	2.94497
2	226703	GATGACATAAG	0	1	0	9.47282	0	0	3.55508
2	226721	AAGCTGTCATC	0	1	0	9.53555	0	0	3.40256
2	226972	TATGACAAAAT	0	0	0	0.162063	0	0	0.962102
2	227033	AATGACGGTTT	0	0	0	0.198657	0	0	1.25543
2	227976	ATTTTGTCATG	0	0	0	0.130696	0	0	1.30236
2	228064	TTTGAGTCATC	1	0	0	0.308442	0	0	1.80687
2	228357	CATGACGTCAA	0	0	0	0.230024	0	0	0.973835
2	229060	AATGACCTTTT	0	0	0	0.0418226	0	0	0.762642
2	230044	AATGACTTCAA	0	0	0	0.182974	0	0	0.621846
2	230317	GATGACACCTT	0	0	0	0.0993287	0	0	0.563182
2	230396	AGGTAGTCATG	0	0	0	0.109784	0	0	0.445852
2	230480	TAGCTGTCATT	0	0	0	0.0313669	0	0	0.504517
2	230628	GATGACTGGTT	0	0	0	0.188202	0	0	0.985568
2	232444	GATGACGAAAC	0	0	0	0.130696	0	0	0.774375
2	233689	TATGACATTGC	0	0	0	0.261391	0	0	0.680511
2	233788	TATGACCAAAG	0	0	0	0.146379	0	0	0.727443
2	235331	TATGACCTACT	0	0	0	0.198657	0	0	0.856505
2	235353	AATGACAAGAA	0	0	0	0.198657	0	0	0.891704
2	236007	TAGTAGTCATG	0	0	0	0.533238	0	0	0.844772
2	236285	TTGCCGTCATA	0	0	0	0.365948	0	0	0.621846
2	236913	ATTTAGTCATG	0	0	0	2.8753	0	0	1.60741
2	237268	CATGACCGTAT	0	0	0	0.423454	0	0	0.973835
2	237521	AATGACAAAAA	0	0	0	0.162063	0	0	0.633579
2	238499	TATTAGTCATT	0	1	0	5.97018	0	0	2.42872
2	239672	AATGACGAAAG	0	0	0	0.230024	0	0	0.633579
2	239763	GTCGTGTCATG	0	0	0	0.376403	0	0	0.71571
2	241759	TCCTCGTCATA	0	0	0	0.0575061	0	0	0.91517
2	242267	CTAAAGTCATC	0	0	0	0.365948	0	0	0.762642
2	242543	AATGACCAGGT	0	0	0	0.256163	0	0	0.504517
2	242624	AACCTGTCATT	0	0	0	0.156835	0	0	0.445852
2	243119	CATGACAGAAA	0	0	0	0.0731895	0	0	0.668778
2	243390	GATGACGTTAT	0	0	0	0.669162	0	0	0.774375
2	244280	AGAAGGTCATA	0	0	0	0.0313669	0	0	0.645312
2	244590	TATGACGACCA	0	0	0	0.0731895	0	0	0.621846
2	244760	AATGACTCTGA	0	0	0	0.0836452	0	0	0.833039
2	245815	AATGACCGACA	0	0	0	0.0627339	0	0	0.481051
2	246010	TCGTCGTCATG	0	0	0	1.12921	0	0	0.610113
2	246265	TATGACCAGCG	0	0	0	0.203885	0	0	0.633579
2	246541	GCAAGGTCATG	0	0	0	0.0522782	0	0	0.809573
2	247014	CATGACTTTGA	0	0	0	0.0365948	0	0	0.621846
2	247562	CAGTAGTCATC	0	0	0	0.135923	0	0	0.786108
2	248027	GTTGTGTCATT	0	0	0	0.250936	0	0	0.856505
2	249344	GATGACGCATA	0	1	0	19.6828	0	0	1.26716
2	249455	TATGACTGAAG	0	1	0	1.74609	0	0	1.14983
2	249676	GATGACTGAGG	0	0	0	0.250936	0	0	0.938636
2	249971	CATTTGTCATG	0	0	0	0.266619	0	0	0.891704
2	250498	TCAGAGTCATA	0	0	0	1.23377	0	0	0.985568
2	250900	GATGACTCGAA	0	0	0	2.58777	0	0	1.09116
2	251537	TATGACTTACT	0	0	0	0.6012	0	0	0.586647
2	252026	CATGACCAAAT	0	0	0	1.23899	0	0	1.31409
2	252034	AATGACTCTTT	0	0	0	1.25991	0	0	1.39622
2	252704	AAATTGTCATA	0	0	0	0.104556	0	0	0.774375
2	253298	TACCTGTCATC	0	0	0	0.188202	0	0	0.750909
2	253615	CATGACGATTA	0	0	0	0.376403	0	0	0.574915
2	253800	CATGACCAACG	0	0	0	0.172518	0	0	0.504517
2	254263	AATGACAAAGA	0	0	0	2.22705	0	0	0.680511
2	255489	GATGACGGATT	0	0	0	0.386859	0	0	1.45489
2	256752	TGATTGTCATC	0	0	0	0.214341	0	0	1.14983
2	257301	CAGGAGTCATG	0	0	0	0.444365	0	0	1.1029
2	257971	TGTAGGTCATT	0	0	0	0.141151	0	0	0.844772
2	258133	AAAAAGTCATC	0	1	0	2.04408	0	0	0.445852
2	258161	AATGACTGTGG	0	1	0	2.74461	0	0	0.469318
2	258198	GATGACGATAT	0	1	0	3.02168	0	0	0.51625
2	258880	GATGACTGTTT	0	0	0	0	0	0	1.07943
2	259384	TATCTGTCATC	0	0	0	0	0	0	0.926903
2	259660	GATGACATAAG	0	1	0	9.19052	0	0	2.065
2	259678	AAGCTGTCATC	0	1	0	9.27416	0	0	2.01807
2	260143	GATGACCCAAA	0	0	0	0.491416	0	0	7.53255
2	260171	GGTTGGTCATT	0	0	0	0.543694	0	0	8.0488
2	260356	TATGACATCCA	0	1	1	7.13075	0	0	8.33039
2	260408	AATGACTTTCC	0	1	1	1.97089	0	0	6.61738
2	260851	CACACGTCATC	0	0	0	2.99554	0	0	5.81954
2	260872	TATGACAGTCG	0	0	0	2.90144	0	0	5.85474
2	261444	TATGACTTACT	0	0	0	0.266619	0	0	3.83667
2	262212	GATGACTGCCG	0	0	0	0.104556	0	0	3.78974
2	262686	CATGACTTTCA	0	0	0	0.674389	0	0	1.72474
2	263169	CTTCCGTCATC	0	0	0	0	0	0	0.469318
2	263694	TATGACAGAAA	0	0	0	0.40777	0	0	3.0623
2	263861	AATGACATCCC	0	1	0	2.7812	0	0	4.69318
2	264105	GGATGGTCATG	0	0	0	0.36072	0	0	2.47565
2	264599	TATGACATATG	0	0	0	0.491416	0	0	3.07403
2	265085	AATGACCAAAC	0	0	0	0.245708	0	0	2.89804
2	265245	GATGACATAAG	0	1	0	9.6767	0	0	2.9919
2	265263	AAGCTGTCATC	0	1	0	9.86491	0	0	2.75724
2	267518	TATGACGTAGT	0	0	0	0.16729	0	0	0.833039
2	267574	GTAAAGTCATT	0	0	0	0.109784	0	0	0.891704
2	267815	AAAAGGTCATC	0	0	0	0.141151	0	0	0.621846
2	268636	CATGACCAAGC	0	0	0	0.40777	0	0	0.797841
2	269431	AATGACGAACA	0	0	0	0.40777	0	0	0.563182
2	271788	AATGACATAGA	0	0	0	0.135923	0	0	0.680511
2	272259	AACATGTCATT	0	0	0	0.162063	0	0	0.727443
2	272472	TATTCGTCATT	0	0	0	0.893958	0	0	0.821306
2	272570	TCGTTGTCATC	0	1	0	6.28385	0	0	0.833039
2	274302	ATGATGTCATT	0	0	0	0.0679617	0	0	1.02077
2	274777	AATGACCAAGG	0	0	0	0.104556	0	0	0.762642
2	275179	TATGACGAAAC	0	0	0	0.266619	0	0	0.727443
2	275523	CAGCAGTCATT	0	0	0	0.0522782	0	0	0.539716
2	275766	AATGACAGAAA	0	0	0	0.0575061	0	0	0.457585
2	277237	CTTGCGTCATA	0	0	0	0.501871	0	0	0.950369
2	277583	TATGACCTTTT	0	0	0	0.0784174	0	0	0.551449
2	277862	TATGACCATAC	0	0	0	0.224796	0	0	0.680511
2	278242	ACACAGTCATA	0	0	0	1.44811	0	0	0.938636
2	278348	GAGCTGTCATT	0	0	0	0.104556	0	0	0.774375
2	278952	CAAATGTCATA	0	0	0	0.182974	0	0	0.680511
2	279025	AATGACTAAAT	0	0	0	0.292758	0	0	0.750909
2	280255	AATGACTACAG	0	0	0	0.125468	0	0	0.574915
2	280869	TATGACTACCA	0	0	0	2.26365	0	0	0.668778
2	280921	TCAAAGTCATT	0	0	0	2.00226	0	0	0.586647
2	281110	AATGACAGAAA	0	0	0	0.0941008	0	0	0.469318
2	281190	TATGACATCAG	0	0	0	0.0836452	0	0	0.492784
2	281565	TATAAGTCATC	0	0	0	0.292758	0	0	0.762642
2	281961	CATTTGTCATT	0	0	0	0.454821	0	0	0.563182
2	282031	GAGTCGTCATG	0	0	0	0.36072	0	0	0.633579
2	283287	GATGACCTGGT	0	0	0	0.548922	0	0	0.574915
2	283299	GATGACAATAT	0	0	0	0.580289	0	0	0.574915
2	283782	CCAAAGTCATA	0	0	0	0.162063	0	0	0.574915
2	284006	TTCAAGTCATG	0	0	0	0.19343	0	0	0.774375
2	284593	GAGAAGTCATC	0	0	0	0.297986	0	0	1.05597
2	284793	AATGACATAAA	0	0	0	0.214341	0	0	0.645312
2	285506	ATTGAGTCATT	1	0	0	0.899186	0	0	2.04153
2	285676	GAATCGTCATA	0	0	0	0.151607	0	0	1.07943
2	286187	GAGTGGTCATT	0	0	0	0.339809	0	0	0.527983
2	286196	TTGTTGTCATT	0	0	0	0.376403	0	0	0.51625
2	286711	TTCAAGTCATC	0	0	0	0.256163	0	0	0.856505
2	286738	TCAACGTCATC	0	0	0	0.250936	0	0	0.821306
2	286898	TATGACAGTTC	0	0	0	0.224796	0	0	0.821306
2	286999	TCATCGTCATG	0	0	0	0.606428	0	0	0.926903
2	287045	TATGACAGTTA	0	0	0	0.632567	0	0	0.962102
2	287304	GATGACAGAAA	0	0	0	0.135923	0	0	0.574915
2	287428	AATGACAATGT	0	0	0	0.146379	0	0	0.504517
2	287893	TAGTAGTCATC	0	0	0	0.643022	0	0	0.926903
2	287921	AGCCGGTCATT	0	0	0	0.512327	0	0	0.903437
2	289084	TATGACGGTTG	0	0	0	0.104556	0	0	0.59838
2	289899	ATTCAGTCATT	0	0	0	0.141151	0	0	0.833039
2	292054	TTTGGGTCATA	0	0	0	0.141151	0	0	0.375454
2	292147	GCGTGGTCATT	0	0	0	0.104556	0	0	0.410653
2	292819	TCGATGTCATA	0	0	0	0.177746	0	0	0.703977
2	294067	AATGACAATGT	0	0	0	0.622111	0	0	0.610113
2	294548	TATGACATAGA	0	0	0	0.250936	0	0	0.868238
2	294941	AACATGTCATA	0	0	0	1.05602	0	0	0.774375
2	295436	CCATCGTCATT	0	0	0	0.135923	0	0	0.657045
2	295943	TTAATGTCATT	0	0	0	1.58403	0	0	1.16156
2	296177	CATGACAGAGC	0	0	0	0.653478	0	0	1.02077
2	296207	ATATAGTCATA	0	0	0	0.64825	0	0	1.05597
2	297495	CATGACCCGAT	0	0	0	0.261391	0	0	0.657045
2	297777	TATGACAGGTT	0	0	0	0.6012	0	0	0.856505
2	297904	CACATGTCATC	0	0	0	0.266619	0	0	0.774375
2	297951	AATGACTGTCA	0	0	0	0.261391	0	0	0.797841
2	298584	TTCTAGTCATT	0	0	0	0.465276	0	0	1.24369
2	298627	GATGACGAAGG	0	0	0	0.433909	0	0	1.12636
2	299123	CTCGTGTCATC	0	0	0	0.224796	0	0	0.551449
2	299260	AATGACGTCGC	0	0	0	0.501871	0	0	0.668778
2	299445	AGTCGGTCATG	0	0	0	0.088873	0	0	0.703977
2	302447	GATGACATCAA	0	0	0	0.245708	0	0	0.727443
2	303227	AGAAGGTCATC	0	0	0	0.0731895	0	0	0.645312
2	303727	AACAGGTCATA	0	0	0	0.088873	0	0	0.621846
2	303998	AATGACCATAT	0	0	0	0.0522782	0	0	0.71571
2	304394	AATGACAGAAT	0	0	0	0.496643	0	0	0.59838
2	304405	TATGACGTTGT	0	0	0	0.507099	0	0	0.621846
2	304487	CATGACCGTGC	0	0	0	0.24048	0	0	0.657045
2	304796	GCAAAGTCATA	0	0	0	0.141151	0	0	0.692244
2	306951	GTTTAGTCATT	0	0	0	1.44288	1	0	2.04153
2	307029	AATTAGTCATT	0	0	0	2.17478	1	0	2.65165
2	308549	AATGACACAAG	0	0	0	0.209113	0	0	0.645312
2	308846	CATGACGAGGA	0	0	0	0.0784174	0	0	0.786108
2	309057	CATCAGTCATA	0	1	0	7.13598	0	0	1.04423
2	309158	TATGACTTCCC	0	0	0	1.27036	0	0	0.985568
2	309348	CTCTTGTCATT	0	0	0	0.0941008	0	0	0.868238
2	309698	AATGACCGCGT	0	0	0	0.496643	0	0	1.02077
2	309834	AATGACAAAGC	0	0	0	0.580289	0	0	0.950369
2	310316	CATGACGCTGT	0	0	0	0.365948	0	0	0.657045
2	311902	AATGACGAGAA	0	0	0	0.632567	1	1	1.86554
2	312044	TATGACCAATC	0	0	0	0.115012	0	0	1.09116
2	312219	AGGCTGTCATA	0	0	0	0.12024	0	0	0.551449
2	314816	TTCTCGTCATT	0	0	0	0.172518	0	0	0.563182
2	314864	TATGACAACCA	0	0	0	0.219569	0	0	0.551449
2	315572	TAGTAGTCATG	0	0	0	0.397315	0	0	0.563182
2	316130	TGAGTGTCATG	0	0	0	0.0575061	0	0	0.844772
2	316177	AATGACCCAGT	0	0	0	0.109784	0	0	0.762642
2	316457	AAGCTGTCATT	0	0	0	0.397315	0	0	0.938636
2	317129	GATGACAACTC	0	0	0	0.507099	0	0	0.962102
2	317199	AGGAAGTCATT	0	0	0	0.209113	0	0	0.950369
2	317275	TATGACTACAT	0	0	0	0.365948	0	0	0.879971
2	319110	TTTTGGTCATG	0	1	0	25.2086	0	0	1.22023
2	319128	TATGACTAATG	0	1	0	26.228	0	0	1.37276
2	319549	TTTTTGTCATT	0	0	0	0.24048	0	0	0.621846
2	319588	AATGACGATTC	0	0	0	0.19343	0	0	0.657045
2	320115	AATGACAGATA	0	0	0	0.454821	0	0	0.645312
2	320185	AATGACACTAT	0	0	0	0.308442	0	0	0.610113
2	322147	CAATTGTCATC	0	0	0	0.19343	0	0	0.91517
2	322459	CAACTGTCATA	0	0	0	0.0993287	0	0	0.750909
2	323120	AATGACATTAC	0	0	0	0.104556	0	0	1.07943
2	324304	AATGACTCATT	1	0	1	71.7676	0	1	16.0859
2	324651	CCTTAGTCATG	0	0	0	0.277075	0	0	1.38449
2	324753	CATGACATAGG	0	0	0	0.130696	0	0	1.26716
2	325010	ATGCTGTCATA	0	0	0	0.303214	0	0	1.14983
2	325070	GCTAAGTCATT	0	0	0	0.146379	0	0	1.0677
2	325432	TATGACCCGCA	0	0	0	0.402543	0	0	0.821306
2	325442	ACAATGTCATC	0	0	0	0.402543	0	0	0.844772
2	326882	ACTATGTCATT	0	0	0	0.266619	0	0	1.44315
2	327147	GATGACATAAG	0	0	0	0.470504	0	0	0.844772
2	327422	CAGTAGTCATA	0	0	0	3.52878	0	0	1.05597
2	327483	AAACAGTCATC	0	0	0	3.46605	0	0	1.18503
2	327685	TATGACAAAAT	0	0	0	0.162063	0	0	0.879971
2	328780	GATGACTTTTG	0	0	0	0.0470504	0	0	0.680511
2	329099	TATGACCACAT	0	0	0	0.454821	0	0	0.692244
2	329764	CATGACGTATT	0	0	0	0.141151	0	0	0.879971
2	329917	AATGACCAGAA	0	0	0	0.653478	0	0	1.00903
2	330406	AACCTGTCATA	0	0	0	0.0784174	0	0	0.950369
2	331181	CATGACTGGGC	0	0	0	0.266619	0	0	0.668778
2	331481	AATGACTTTTT	0	0	0	0.172518	0	0	1.02077
2	332313	TTGATGTCATG	0	0	0	0.339809	0	0	0.809573
2	333219	AATGACTATTT	0	0	0	0.339809	0	0	0.821306
2	333594	CCATTGTCATC	0	0	0	0.261391	0	0	0.962102
2	334014	AATGACATCTT	0	0	0	0.16729	0	0	0.833039
2	334986	GCATCGTCATC	0	0	0	0.334581	0	0	0.633579
2	335106	TTCTGGTCATC	0	0	0	1.3906	0	0	0.51625
2	336108	TCGTTGTCATC	0	1	0	2.80734	0	0	0.868238
2	336162	TGTCTGTCATC	0	1	0	2.07545	0	0	0.91517
2	336168	TCATCGTCATC	0	1	0	1.98135	0	0	0.938636
2	336381	TCGTCGTCATC	0	1	0	3.14715	0	0	0.797841
2	336423	TTACTGTCATT	0	1	0	4.5848	0	0	0.856505
2	336456	TTTTCGTCATC	0	1	0	4.11953	0	0	0.797841
2	336624	TTACTGTCATC	0	0	0	1.61017	0	0	0.668778
2	336720	TGAGGGTCATG	0	0	0	0.214341	0	0	0.680511
2	336808	TATGACCTGAA	0	0	0	0.125468	0	0	0.739176
2	337228	TCAATGTCATT	0	0	0	0.616883	0	0	0.809573
2	337298	AATGACTTGAA	0	0	0	1.11353	0	0	0.809573
2	337334	GATGACTTATG	0	0	0	0.805085	0	0	0.703977
2	338195	TCAAAGTCATT	0	0	0	0.0470504	0	0	0.750909
2	338911	AATGACACCAT	0	0	0	1.08216	0	0	0.621846
2	339608	GCGGTGTCATA	0	0	0	0.643022	0	0	0.610113
2	339617	TATGACGCTAG	0	0	0	0.64825	0	0	0.610113
2	340364	AATGACATATT	0	0	0	0.16729	0	0	0.844772
2	340570	AATGACTGGAT	0	0	0	0.19343	0	0	0.856505
2	341299	GATGACGATTG	0	0	0	0.209113	0	0	0.739176
2	341385	CCGATGTCATT	0	0	0	0.392087	0	0	0.586647
2	342509	ATTTCGTCATC	0	0	0	0.0784174	0	0	0.633579
2	343546	TATGACTGAAA	0	0	0	0.444365	0	0	0.950369
2	343660	GATGACAACTA	0	0	0	0.564605	0	0	0.856505
2	343728	TGAGTGTCATC	0	0	0	0.684845	0	0	0.786108
2	343985	TTCAAGTCATC	0	0	0	0.162063	0	0	1.02077
2	344608	TATTTGTCATT	0	0	0	0.224796	0	0	0.657045
2	346142	TCAAAGTCATT	0	0	0	0.0836452	0	0	0.703977
2	346609	TATGACTTTAA	0	0	0	0.0522782	0	0	0.621846
2	347026	GAATTGTCATC	0	0	0	0.303214	0	0	0.71571
2	347188	CCTTTGTCATC	0	0	0	0.256163	0	0	0.833039
2	348498	CATGACCAAAG	0	0	0	0.64825	0	0	0.668778
2	348543	AATGACTCTGG	0	0	0	0.580289	0	0	0.680511
2	348674	TACCTGTCATA	0	0	0	0.0679617	0	0	0.844772
2	348749	TAGTGGTCATT	0	0	0	0.0836452	0	0	0.692244
2	349099	GATGACTTACA	0	0	0	0.250936	0	0	0.71571
2	349968	AAGGCGTCATT	0	0	0	0.16729	0	0	0.586647
2	350032	AATGACCGAAA	0	0	0	0.0993287	0	0	0.504517
2	350263	ATGAAGTCATC	0	0	0	1.31741	0	0	0.809573
2	350397	AGCAAGTCATT	0	0	0	0.277075	0	0	0.809573
2	350539	AATGACATAAA	0	0	0	0.501871	0	0	0.680511
2	350585	GATGACAACTT	0	0	0	0.355492	0	0	0.739176
2	352529	GATGACAGTTT	0	0	0	0.381631	0	0	1.18503
2	352730	ATTCTGTCATC	0	1	0	1.00897	0	0	1.1381
2	352848	TAGCGGTCATA	0	1	0	9.21143	0	0	1.17329
2	352868	GATGACATCGA	0	1	0	12.85	0	0	1.17329
2	352874	ATCGAGTCATT	0	1	0	15.0248	0	0	1.19676
2	352908	TATTTGTCATA	0	1	0	14.2615	0	0	1.19676
2	353838	TATGACAAATA	0	0	0	0.224796	0	0	0.727443
2	354131	TCAGGGTCATC	0	0	0	0.0836452	0	0	0.71571
2	356067	TACCTGTCATC	0	0	0	0.28753	0	0	0.668778
2	356144	ACGATGTCATT	0	0	0	0.277075	0	0	0.750909
2	356562	GTTGTGTCATT	0	1	0	2.30547	0	0	1.05597
2	356643	ATGGTGTCATT	0	1	0	3.1001	0	0	0.997301
2	356716	TAAACGTCATC	0	1	0	2.76552	0	0	0.692244
2	357311	AATGACTGCCG	0	0	0	0.135923	0	0	0.586647
2	357405	TATGACCTCTT	0	0	0	0.188202	0	0	0.539716
2	358445	CTTGCGTCATT	0	0	0	0.209113	0	0	0.527983
2	358995	CATGACCGTCA	0	1	1	3.78495	1	1	2.29966
2	359051	AACATGTCATT	0	1	1	7.99334	1	1	2.66338
2	359376	GACCTGTCATT	0	0	0	0.109784	0	0	0.926903
2	359702	GCAACGTCATA	0	0	0	0.324125	0	0	0.703977
2	360487	TATAGGTCATA	0	0	0	0.0993287	0	0	0.375454
2	361179	GATGACGGAGA	0	0	0	0.19343	0	0	0.469318
2	362692	CTATTGTCATT	0	0	0	0.250936	0	0	0.504517
2	363085	TTATAGTCATC	0	0	0	0.172518	0	0	0.809573
2	363378	CATGACCTTTA	0	0	0	0.0470504	0	0	0.973835
2	363627	TATGACCCCAA	0	1	0	10.6125	1	0	2.11193
2	363638	TATGACACATA	0	1	0	16.0651	1	0	2.18233
2	363710	TATGACTGAAT	0	1	0	13.9217	1	0	1.93594
2	364907	GGTAGGTCATG	0	0	0	0.198657	0	0	0.481051
2	365618	AATTGGTCATT	0	0	0	0.177746	0	0	0.668778
2	367915	TCTTGGTCATT	0	0	0	0.12024	0	0	0.950369
2	368662	TTCTTGTCATT	0	0	0	0.125468	0	0	0.703977
2	368779	AATGACGCAGC	0	0	0	0.177746	0	0	0.844772
2	368965	AATGACAATGA	0	0	0	0.224796	0	0	0.786108
2	369377	CCTCCGTCATA	0	0	0	0.350264	0	0	0.727443
2	369602	TTTTAGTCATT	0	0	0	0.6012	0	0	0.786108
2	369821	TAAACGTCATC	0	0	0	0.0993287	0	0	0.621846
2	370203	GATGACCAGAA	0	0	0	0.151607	0	0	0.962102
2	370245	AATGACGAGTC	0	0	0	0.12024	0	0	0.821306
2	370508	TTCAAGTCATC	0	0	0	0.16729	0	0	0.727443
2	370762	TATGACTTGGT	0	0	0	0.318897	0	0	0.868238
2	370788	GAGCTGTCATA	0	0	0	0.297986	0	0	0.844772
2	371533	TATGACATCAT	0	0	0	0.162063	0	0	0.91517
2	372520	TAAGCGTCATC	0	1	0	10.4609	0	0	0.739176
2	372533	TGTAAGTCATG	0	1	0	10.4556	0	0	0.71571
2	372540	CATGACTTGTT	0	1	0	10.1368	0	0	0.739176
2	373249	ATAAGGTCATT	0	0	0	0.0784174	0	0	0.703977
2	373731	ATAAGGTCATT	0	0	0	0.313669	0	0	0.786108
2	373773	GTGAAGTCATA	0	0	0	0.444365	0	0	0.750909
2	374373	AATGACGCCGA	0	0	0	0.292758	0	0	1.17329
2	374635	AGTTGGTCATC	0	0	0	0.48096	0	0	1.33756
2	374899	TAACCGTCATT	0	0	0	0.784174	1	0	2.18233
2	375095	GAATAGTCATA	0	0	0	0.6012	1	0	1.85381
2	375390	CATGACAACAT	0	0	0	0.182974	0	0	1.19676
2	375899	GAAGAGTCATT	0	0	0	0.444365	1	0	2.75724
2	376590	AATTGGTCATC	0	0	0	0.104556	0	0	0.973835
2	377281	AATGACAGAAA	0	1	0	1.00374	0	0	1.00903
2	377350	AATGACAAATG	0	1	0	19.3691	0	0	1.07943
2	377692	AATGACGAATC	0	0	0	1.38015	0	0	0.844772
2	377841	TAACTGTCATT	0	0	0	0.470504	0	0	0.821306
2	378136	CATGACTAAGT	0	0	0	0.993287	0	0	0.645312
2	379612	AATGACCAAAT	0	0	0	0.0313669	0	0	0.610113
2	379741	TATGACCTCCC	0	0	0	0.0365948	0	0	0.71571
2	379914	AATGACGCCAA	0	0	0	0.501871	0	0	0.71571
2	380183	AATGACCTGTA	0	0	0	0.0365948	0	0	0.527983
2	380824	AATGACTATTC	0	0	0	0.533238	0	0	0.973835
2	382032	AACATGTCATT	0	0	0	0.12024	0	0	0.610113
2	382260	AATGACTTGTC	0	0	0	0.188202	0	0	0.680511
2	382332	CATGACAACAA	0	0	0	0.297986	0	0	0.879971
2	382510	AGAGAGTCATC	0	0	0	0.575061	0	0	0.762642
2	382747	ATATGGTCATC	0	0	0	0.188202	0	0	0.762642
2	382847	TATGACCGTTA	0	0	0	0.109784	0	0	0.610113
2	383756	AATGACGGTGG	0	0	0	0.109784	0	0	0.610113
2	383851	CATGACCACAG	0	0	0	0.16729	0	0	0.727443
2	384119	AATGACTCAGA	1	0	1	12.3743	0	1	2.86284
2	385123	AATGACATTAC	0	0	0	0.0941008	0	0	0.91517
2	385661	CATGACTTAAT	0	0	0	0.250936	0	0	0.680511
2	385989	AATGACGCCAA	0	0	0	0.12024	0	0	0.633579
2	386450	AATGACTTATT	0	0	0	0.277075	1	1	3.27349
2	386600	GATGACAAAGA	0	1	1	203.493	1	1	9.35116
2	386651	AATGAGTCATC	1	0	1	311.85	0	1	12.8828
2	386792	GATGACGGCAT	0	0	0	0.303214	1	1	5.63182
2	387442	AATGACTTGGA	0	0	0	0.156835	0	0	0.668778
2	389018	GATGACAAGTT	0	0	0	0.203885	0	0	0.833039
2	389981	CGGACGTCATA	0	0	0	0.19343	0	0	0.551449
2	391504	AAGCTGTCATG	0	0	0	0.141151	0	0	0.774375
2	393423	TGCCTGTCATA	0	0	0	0.135923	0	0	0.973835
2	394305	TGAAGGTCATT	0	0	0	0.245708	0	0	1.07943
2	395432	CCATAGTCATT	0	0	0	0.130696	0	0	0.645312
2	395943	CATGACCAAGT	0	0	0	0.156835	0	0	0.71571
2	396499	TCAAGGTCATC	0	0	0	0.0731895	0	0	0.750909
2	396999	AATGACGTCTC	0	0	0	0.115012	0	0	0.692244
2	398445	TATGACAGGCA	0	0	0	0.151607	0	0	0.610113
2	398462	AATGACAGAAT	0	0	0	0.135923	0	0	0.551449
2	398627	ATTGGGTCATC	0	0	0	0.0470504	0	0	0.809573
2	398793	CATGACGTTGT	0	0	0	1.80883	0	0	1.04423
2	398816	AATTGGTCATA	0	0	0	2.05454	0	0	1.05597
2	398897	TAGTAGTCATG	0	0	0	0.742351	0	0	0.938636
2	399710	GATTGGTCATA	0	0	0	0.339809	0	0	0.997301
2	400832	TGTTTGTCATA	0	0	0	0.679617	0	0	0.621846
2	401602	TGGAAGTCATT	0	0	0	0.203885	0	0	0.762642
2	401631	GATGACTTGCT	0	0	0	0.224796	0	0	0.821306
2	402381	AGTGAGTCATC	1	0	1	2558.29	0	1	16.1328
2	402798	AATTGGTCATC	0	0	0	0.428682	0	0	0.879971
2	403071	CTATCGTCATC	0	0	0	0.282303	0	0	0.739176
2	403128	TCTTCGTCATC	0	0	0	0.475732	0	0	0.703977
2	403385	GATGACAGAAG	0	0	0	1.88724	0	0	0.91517
2	403398	AGTTTGTCATC	0	0	0	1.91338	0	0	0.938636
2	403749	TTGGAGTCATA	0	0	0	0.24048	0	0	1.11463
2	404823	CTTTCGTCATT	0	0	0	0.209113	0	0	0.621846
2	405247	TTTCAGTCATT	0	0	0	0.151607	0	0	0.703977
2	405794	GAATTGTCATA	0	0	0	0.245708	0	0	0.844772
2	406117	AACCAGTCATT	0	0	0	0.747579	0	0	1.20849
2	406202	AATGACAATAG	0	0	0	0.308442	0	0	0.844772
2	407634	ATGAAGTCATA	0	0	0	1.35923	0	0	0.833039
2	407683	AATGACACCTT	0	0	0	0.982831	0	0	0.797841
2	408253	TATGACAGCCT	0	0	0	0.590744	0	0	0.739176
2	409045	TATGACAACCC	0	0	0	0.0313669	0	0	0.750909
2	409867	TATGACATATT	0	0	0	0.19343	0	0	0.750909
2	411422	GATGACTCTAT	0	1	0	4.55344	0	0	1.43142
2	411724	TGTCTGTCATA	0	0	0	0.909641	0	0	0.891704
2	411730	TCATAGTCATA	0	0	0	0.935781	0	0	0.891704
2	411976	AATGACTGTCG	0	0	0	0.0731895	0	0	0.563182
2	412754	AATGACAGGAT	0	0	0	0.224796	0	0	0.59838
2	413144	AATGACAAGAA	0	0	0	0.146379	0	0	0.833039
2	414762	TTAAAGTCATG	0	0	0	0.125468	0	0	0.938636
2	414865	AATGACATGGT	0	0	0	0.162063	0	0	1.00903
2	415680	GATGACAAAAT	0	0	0	0.277075	0	0	0.692244
2	416722	GATGACTTCAG	0	0	0	0.297986	0	0	0.879971
2	416795	GTAGGGTCATT	0	0	0	0.151607	0	0	0.762642
2	416867	TATGACCAGTT	0	0	0	0.214341	0	0	0.739176
2	416927	AAAAAGTCATT	0	0	0	0.0993287	0	0	0.680511
2	417751	TATGACTATTT	0	0	0	0.0993287	0	0	0.856505
2	418169	ATATAGTCATG	0	0	0	0.12024	0	0	0.727443
2	418673	AATGACAGGGT	0	0	0	0.0313669	0	0	0.809573
2	418677	ACAGGGTCATG	0	0	0	0.0313669	0	0	0.797841
2	418969	GATGACTTCGC	0	0	0	0.334581	0	0	1.19676
2	419162	GATGACATGTT	0	0	0	0.203885	0	0	1.19676
2	421260	GCAACGTCATC	0	0	0	0.088873	0	0	0.692244
2	422194	ACTTTGTCATT	0	0	0	0.402543	0	0	1.04423
2	422541	AATGACAATGT	0	0	0	0.198657	0	0	0.950369
2	423767	AACATGTCATT	0	0	0	0.313669	0	0	0.71571
2	424086	GAATTGTCATC	0	0	0	0.266619	0	0	0.71571
2	424840	GATATGTCATA	0	0	0	2.97463	0	0	0.809573
2	424999	TCTTCGTCATT	0	0	0	0.0209113	0	0	0.868238
2	425229	TATGACTGAAC	0	0	0	1.4272	0	0	1.17329
2	425356	AATGACAGGGT	0	0	0	0.324125	0	0	0.997301
2	425641	CTTGAGTCATC	1	0	1	8.05608	0	0	1.77168
2	427913	AATGACGTATC	0	0	0	0.334581	0	0	0.797841
2	428391	GCAATGTCATC	0	0	0	0.517555	0	0	0.786108
2	428427	AAAATGTCATC	0	0	0	0.632567	0	0	0.739176
2	428568	GCAGTGTCATG	0	0	0	0.501871	0	0	0.668778
2	428742	TCATCGTCATC	0	1	0	10.4661	0	0	0.610113
2	428784	AATGACAATGA	0	1	0	11.0255	0	0	0.610113
2	429692	TAGAAGTCATT	0	0	0	3.68039	0	0	0.59838
2	429763	AATGACGTATC	0	0	0	3.92087	0	0	0.692244
2	430241	GCAATGTCATC	0	0	0	4.57435	0	0	0.821306
2	430277	ACAATGTCATC	0	0	0	4.79914	0	0	0.91517
2	430418	GCAGTGTCATG	0	0	0	4.38092	0	0	1.02077
2	430425	CATGACATCTC	0	0	0	4.27636	0	0	0.985568
2	430592	TCATCGTCATC	0	1	0	7.27713	0	0	0.739176
2	430634	AATGACAATGA	0	1	0	7.366	0	0	0.797841
2	431439	GATGACTTCCA	0	0	0	0.16729	0	0	0.469318
2	433589	AATGACGACGA	0	0	0	0.324125	0	0	0.610113
2	434186	GATGACACTGT	0	0	0	0.318897	0	0	0.586647
2	434268	TAAAAGTCATT	0	0	0	0.235252	0	0	0.51625
2	434881	TATGACCAGCT	0	0	0	0.146379	0	0	0.739176
2	434940	TTAATGTCATC	0	0	0	0.219569	0	0	0.727443
2	435237	AGGTCGTCATC	0	0	0	1.90816	0	0	0.692244
2	435694	TAATAGTCATC	0	0	0	1.00897	0	0	0.950369
2	435763	ATGCTGTCATC	0	0	0	0.412998	0	0	0.762642
2	436471	TTTACGTCATG	0	0	0	0.214341	0	0	0.668778
2	437283	TATGACAGATT	0	0	0	0.188202	0	0	0.633579
2	437715	TATGACGTAAA	0	0	0	0.109784	0	0	0.750909
2	437906	TATGACAACAA	0	0	0	0.214341	0	0	0.668778
2	438017	AATATGTCATT	0	0	0	0.0261391	0	0	0.645312
2	438815	ACTGAGTCATT	1	0	0	1.06648	0	0	2.18233
2	439470	CATGACAACAA	0	0	0	0.0993287	0	0	0.657045
2	439846	CTACCGTCATG	0	0	0	0.0627339	0	0	0.504517
2	440328	TATGACTGCTC	0	0	0	0.951464	0	0	0.692244
2	441790	GATGACTTTTC	0	0	0	0.219569	0	0	0.821306
2	443284	CTAGTGTCATT	0	0	0	0.0575061	0	0	0.633579
2	443523	GATGACTGAGG	0	0	0	0.465276	0	0	0.774375
2	444082	GATGACAAATA	0	0	0	0.857363	0	0	0.703977
2	445161	GATGACTTAAT	0	0	0	0.141151	0	0	0.71571
2	446157	ATAAAGTCATT	0	0	0	0.130696	0	0	0.621846
2	446464	AATGACTTTCA	0	0	0	0.0941008	0	0	0.610113
2	446632	TTACCGTCATG	0	0	0	0.104556	0	0	0.586647
2	446998	TATGACTACTA	0	0	0	0.96192	0	0	0.786108
2	447451	TTCCAGTCATC	0	0	0	0.203885	0	0	0.762642
2	448137	GATGACCTAGA	0	0	0	0.12024	0	0	0.551449
2	448591	GGACCGTCATG	0	0	0	0.230024	0	0	0.809573
2	448698	GATGACAAATT	0	0	0	0.825996	0	0	0.950369
2	448705	AATTTGTCATT	0	0	0	0.710984	0	0	0.891704
2	448815	AATGACACCAA	0	0	0	0.12024	0	0	0.645312
2	449244	GATCTGTCATG	0	0	0	0.0941008	0	0	1.07943
2	449459	GAAGAGTCATC	0	1	0	14.6484	1	0	3.86014
2	449664	AGTTAGTCATG	0	0	0	1.05079	0	0	1.91247
2	450630	AATTAGTCATG	0	0	0	2.09636	0	0	1.56048
2	451648	AATGACTGGAT	0	0	0	0.256163	0	0	0.786108
2	451797	GATGACGGTCA	0	0	0	0.470504	0	0	1.11463
2	451799	TGACGGTCATG	0	0	0	0.475732	0	0	1.1029
2	451972	CATGACTCAAG	1	0	1	28.8994	0	0	2.34659
2	451996	TTGGTGTCATG	0	1	1	27.8748	0	0	2.31139
2	452194	GGTTTGTCATT	0	0	0	0.115012	0	0	0.833039
2	452694	TGTTGGTCATG	0	0	0	2.25842	0	0	0.750909
2	452839	CATGACTACCA	0	0	0	0.439137	0	0	0.727443
2	453499	TATGACTGCCG	0	0	0	0.517555	0	0	0.762642
2	453663	GGGGTGTCATT	0	1	0	10.8477	0	0	1.05597
2	453679	TATGACGAACC	0	1	0	13.1323	0	0	0.997301
2	453703	AATGACGATGA	0	1	0	13.1584	0	0	0.950369
2	453909	TATGACGGAAG	0	0	0	0.345036	0	0	0.71571
2	454206	AATGACACCGT	0	0	0	0.245708	0	0	0.774375
2	454752	ATAAAGTCATT	0	0	0	0.0365948	0	0	0.387187
2	455540	TCAGTGTCATC	0	0	0	0.967148	0	0	0.563182
2	457644	GATGACAGACT	0	0	0	0.135923	0	0	0.59838
2	458120	TCAGAGTCATT	0	0	0	0.386859	0	0	1.05597
2	458249	AATGACCTCAT	0	0	0	0.188202	0	0	1.04423
2	458520	ATAAAGTCATA	0	0	0	0.0941008	0	0	0.39892
2	458787	AATTGGTCATA	0	0	0	0.538466	0	0	0.621846
2	459849	TATGACTGGAA	0	0	0	0.282303	0	0	0.891704
2	460554	TAACAGTCATC	0	0	0	1.2965	0	0	0.926903
2	460845	TATGACATACA	0	0	0	0.245708	0	0	0.469318
2	462143	AATGACTATGG	0	0	0	0.778946	0	0	0.703977
2	463230	CTTTGGTCATT	0	0	0	0.820768	0	0	0.938636
2	463287	GATGACTCTGG	0	0	0	0.967148	0	0	0.91517
2	463913	TATGACTGTTG	0	0	0	0.815541	0	0	0.797841
2	464940	TGAGGGTCATA	0	0	0	1.07693	0	0	0.903437
2	465288	TATCTGTCATA	0	0	0	0.151607	0	0	0.703977
2	465409	AATGACCTAAA	0	0	0	0.104556	0	0	0.657045
2	465561	GTGGCGTCATA	0	0	0	0.271847	0	0	0.692244
2	466343	CATGACATGGC	0	0	0	0.214341	1	1	2.08846
2	467328	GATGACGATAC	0	0	0	0.433909	0	0	0.71571
2	467391	AATGACAGCCA	0	0	0	1.21808	0	0	0.680511
2	467451	GATGACAAAGA	0	0	0	1.41674	0	0	0.833039
2	467538	AATGACGAGAT	0	0	0	1.72518	0	0	0.750909
2	467580	GATGACGACGA	0	0	0	1.64676	0	0	0.750909
2	467789	TATGACCATCA	0	0	0	0.115012	0	0	0.645312
2	468451	GTCACGTCATT	0	0	0	1.41151	0	0	0.703977
2	468606	GATGACTTGGG	0	0	0	0.141151	0	0	0.574915
2	468986	TGTTTGTCATA	0	0	0	0.214341	0	0	0.657045
2	469841	AGTTTGTCATT	0	0	0	0.162063	0	0	0.973835
2	471294	AATGACCACCT	0	0	0	0.146379	0	0	0.786108
2	471665	GACAAGTCATC	0	0	0	0.115012	0	0	0.750909
2	472159	CATGACATCTT	0	0	0	0.104556	0	0	1.00903
2	472190	GGATCGTCATT	0	0	0	0.0313669	0	0	0.997301
2	473648	AATGACCACGT	0	0	0	0.277075	0	0	1.18503
2	473861	AAAAAGTCATG	0	0	0	0.946236	0	0	2.19406
2	473922	CGTTAGTCATT	0	0	0	1.84542	1	1	3.48469
2	474307	CATATGTCATA	0	0	0	0.365948	0	0	2.56952
2	474785	TCCACGTCATG	0	0	0	0.0627339	0	0	0.668778
2	475028	ATAGAGTCATG	0	1	0	5.95449	0	0	0.71571
2	475051	AATGACTGGAT	0	1	0	5.59377	0	0	0.680511
2	475798	CATGACTTCCC	0	0	0	0.209113	0	0	0.668778
2	475883	TTACTGTCATA	0	0	0	0.386859	0	0	0.739176
2	476133	GATGACCCGGT	0	0	0	0.0679617	0	0	0.610113
2	476725	TTCCTGTCATC	0	0	0	0.935781	0	0	0.821306
2	476741	TATGACGAGAA	0	0	0	1.04556	0	0	0.797841
2	476795	AATGACGTTAT	0	0	0	0.988059	0	0	0.71571
2	477711	TATCGGTCATG	0	0	0	0.297986	0	0	1.53702
2	477744	TACCGGTCATT	0	0	0	0.250936	0	0	1.59568
2	478475	CCGGTGTCATC	0	0	0	0.371176	0	0	1.67781
2	478694	CTACCGTCATT	0	0	0	0.188202	0	0	1.47835
2	479422	TATGACCAATA	0	0	0	1.9343	0	0	1.43142
2	479647	GATGACTAACC	0	1	0	6.72821	0	0	2.065
2	479816	AATGACGAAAC	0	0	0	0.172518	0	0	1.09116
2	480299	AATGACGTTAC	0	0	0	0.125468	0	0	0.621846
2	480771	CCTTTGTCATC	0	0	0	0.141151	0	0	0.633579
2	481355	ATTAAGTCATT	0	0	0	0.172518	0	0	1.02077
2	481474	GATGACATTTT	0	0	0	0.245708	0	0	1.07943
2	481586	AATTCGTCATT	0	0	0	0.946236	0	0	1.04423
2	481852	AATGACACTAG	0	0	0	0.219569	0	0	0.51625
2	482000	GCCAAGTCATC	0	0	0	0.261391	0	0	0.563182
2	482882	ACGTCGTCATC	0	0	0	0.16729	0	0	0.903437
2	483102	CATGACCTGAG	0	0	0	0.130696	0	0	0.891704
2	483233	CCATAGTCATA	0	0	0	0.162063	0	0	0.762642
2	484048	AGATAGTCATC	0	0	0	0.256163	0	0	0.71571
2	484246	ACTAGGTCATC	0	0	0	0.0784174	0	0	0.657045
2	484462	TATGACCCTGT	0	0	0	0.0679617	0	0	0.610113
2	484892	TCAACGTCATC	0	0	0	1.47947	0	0	0.786108
2	484901	TCCACGTCATC	0	0	0	1.50561	0	0	0.844772
2	486086	TGAGAGTCATT	0	0	0	0.0993287	0	0	0.950369
2	486349	TATGACCGACT	0	0	0	0.156835	0	0	0.645312
2	487296	TGGCAGTCATA	0	0	0	0.271847	0	0	0.621846
2	488130	CATGACCATCG	0	0	0	0.412998	0	0	0.750909
2	488159	AATGACAGGGT	0	0	0	0.486188	0	0	0.774375
2	488802	GTTATGTCATT	0	0	0	0.0836452	0	0	0.680511
2	490388	CCGTAGTCATA	0	0	0	0.930553	0	0	0.985568
2	491648	TTCTGGTCATA	0	0	0	0.496643	0	0	0.856505
2	491980	GATGACATATC	0	0	0	1.69904	0	0	1.04423
2	492008	CATGACGTTCC	0	0	0	1.65199	0	0	0.973835
2	492082	GTAGGGTCATT	0	0	0	0.297986	0	0	0.762642
2	492215	CATGACCATCA	0	0	0	0.0679617	0	0	0.610113
2	492708	AATGACTAATG	0	0	0	2.43094	0	0	1.50182
2	493033	TATGACTGACT	0	1	0	2.35775	0	0	1.50182
2	493102	CATCGGTCATG	0	1	0	2.19569	0	0	1.32582
2	493942	AACTGGTCATA	0	0	0	0.16729	0	0	0.668778
2	494116	TGCATGTCATA	0	0	0	0.24048	0	0	0.657045
2	494491	GTGTCGTCATT	0	0	0	0.0993287	0	0	0.809573
2	495060	TATGACACTTA	0	0	0	0.339809	0	0	0.563182
2	495164	AATGACGATGG	0	0	0	0.857363	0	0	0.621846
2	495817	GATGACAGCAA	0	0	0	0.12024	0	0	0.762642
2	496222	ACAGAGTCATT	0	0	0	0.0731895	0	0	0.786108
2	496717	ATCTGGTCATG	0	1	0	3.35104	0	0	0.762642
2	496737	AATGACTCTCG	0	1	0	3.30921	0	0	0.786108
2	497062	GATGACAATAA	0	0	0	0.198657	0	0	0.457585
2	497219	AATGACACTTT	0	0	0	0.261391	0	0	0.563182
2	497534	AATGGGTCATT	0	0	0	0.250936	0	0	0.938636
2	497735	GAAGAGTCATG	0	0	0	0.235252	0	0	1.73648
2	497965	ATCAAGTCATA	0	0	0	0.292758	0	0	0.903437
2	500335	AATGACATAAG	0	0	0	0.209113	0	0	0.527983
2	500944	CATGACAGCCA	0	0	0	0.203885	0	0	0.657045
2	501142	AATGACACCGG	0	1	1	1.02465	0	0	0.891704
2	501224	CTTGAGTCATC	1	0	1	5.15464	0	0	1.29062
2	501404	TCACCGTCATT	0	0	0	1.28082	0	0	1.11463
2	501423	CGATGGTCATA	0	0	0	1.30173	0	0	1.0677
2	501438	CCTTTGTCATG	0	0	0	1.22854	0	0	1.04423
2	501733	GATGACGCTGA	0	0	0	0.36072	0	0	0.750909
2	502167	TTAGTGTCATC	0	0	0	1.22331	0	0	1.26716
2	502195	GAATAGTCATG	0	0	0	1.41674	0	0	1.29062
2	502329	TCGGAGTCATC	0	0	0	0.956692	0	0	1.17329
2	502384	ACGAGGTCATA	0	0	0	0.794629	0	0	1.04423
2	502479	GTGCTGTCATT	0	0	0	0.209113	0	0	0.91517
2	502803	TATGACCTCGG	0	0	0	1.48993	0	0	0.903437
2	502821	ATTGTGTCATT	0	0	0	1.36969	0	0	0.856505
2	502960	ATTTGGTCATA	0	0	0	0.125468	0	0	0.833039
2	504000	GTATCGTCATT	0	0	0	0.292758	0	0	0.71571
2	504199	AATGACTAGAG	0	0	0	0.491416	0	0	0.903437
2	506195	TATGACACCTT	0	0	0	0.146379	0	0	0.574915
2	506543	AATGACCCCAC	0	0	0	0.0522782	0	0	0.51625
2	507136	TGTTTGTCATT	0	0	0	0.0731895	0	0	0.633579
2	507549	ATTTAGTCATT	0	0	0	0.543694	0	0	0.950369
2	507664	GATGACTTTGC	0	0	0	0.19343	0	0	0.856505
2	508836	AGTATGTCATA	0	0	0	0.24048	0	0	0.645312
2	509142	TATGGGTCATA	0	1	0	0.941008	0	0	0.891704
2	509214	CCCTTGTCATA	0	1	0	1.98657	0	0	0.91517
2	509255	TCAGAGTCATG	0	1	0	1.63108	0	0	1.02077
2	510143	GATGACCCCAA	0	0	0	0.0784174	0	0	0.821306
2	510182	TATGACCACCA	0	0	0	0.12024	0	0	0.762642
2	510488	ATAACGTCATC	0	0	0	0.0836452	0	0	0.692244
2	510554	TATGACCTCAG	0	0	0	0.0575061	0	0	0.821306
2	510680	AGAAAGTCATT	0	0	0	0.350264	0	0	0.844772
2	511315	ATGTAGTCATG	0	0	0	0.412998	0	0	0.610113
2	512301	ACGCCGTCATG	0	0	0	0.203885	0	0	0.797841
2	512879	TTCATGTCATA	0	0	0	0.564605	0	0	1.44315
2	513339	ATTTGGTCATT	0	0	0	0.16729	0	0	0.750909
2	514271	GATGACACATT	0	0	0	0.428682	0	0	1.38449
2	514842	CCACTGTCATC	0	0	0	0.371176	0	0	0.610113
2	514902	CTCTTGTCATC	0	0	0	0.392087	0	0	0.539716
2	515609	AAATTGTCATC	0	0	0	0.0679617	0	0	0.469318
2	516656	TATGACATTAG	0	0	0	0.846908	0	0	1.0325
2	516797	AATGACGTGTT	0	0	0	0.512327	0	0	1.04423
2	517081	TGCCGGTCATA	0	0	0	0.130696	0	0	0.633579
2	518109	TATGACTCTAA	0	0	0	1.0717	0	0	1.59568
2	518803	AATGACAAACA	0	1	0	5.56241	0	0	0.844772
2	519133	CATGACTTACT	0	0	0	0.156835	0	0	0.692244
2	519288	TCTTCGTCATT	0	0	0	0.428682	0	0	0.680511
2	519336	TATGACAATGA	0	0	0	0.423454	0	0	0.739176
2	519627	AATGACAAATG	0	0	0	0.345036	0	0	0.739176
2	520029	TCCTTGTCATA	0	0	0	0.0731895	0	0	0.645312
2	520471	CCAATGTCATT	0	0	0	0.355492	0	0	0.71571
2	520983	TTTCTGTCATG	0	0	0	0.16729	0	0	0.563182
2	521067	AATGACCCAAC	0	0	0	0.151607	0	0	0.563182
2	521191	ATCTTGTCATG	0	0	0	0.250936	0	0	0.51625
2	523263	TAATGGTCATT	0	0	0	0.245708	0	0	0.633579
2	523462	AGTTGGTCATT	0	0	0	0.24048	0	0	0.610113
2	524578	AAGACGTCATT	0	0	0	0.12024	0	0	0.551449
2	524584	TCATTGTCATT	0	0	0	0.125468	0	0	0.563182
2	525031	TATTTGTCATC	0	0	0	0.643022	0	0	0.879971
2	525129	GAAATGTCATC	0	0	0	0.230024	0	0	0.762642
2	525516	TGGTGGTCATT	0	1	0	3.12624	0	0	0.750909
2	525567	TAAACGTCATC	0	1	0	3.31444	0	0	0.879971
2	526275	TTGAAGTCATT	0	0	0	0.282303	0	0	0.868238
2	527844	ATTTTGTCATT	0	0	0	0.250936	0	0	0.774375
2	528087	TCAAGGTCATG	0	0	0	0.188202	0	0	0.51625
2	528433	GATGACTTTGG	0	0	0	0.104556	0	0	0.703977
2	528858	AATGACTATTT	0	0	0	0.125468	0	0	0.786108
2	528947	TAGACGTCATG	0	0	0	0.0261391	0	0	0.680511
2	529223	AAATTGTCATC	0	0	0	0.130696	0	0	0.586647
2	529341	AGACGGTCATT	0	0	0	0.088873	0	0	0.586647
2	529809	CATGACACAAA	0	0	0	0.0784174	0	0	0.833039
2	530302	GATGACAATTG	0	0	0	0.130696	0	0	0.71571
2	530562	AAGAGGTCATA	0	0	0	0.125468	0	0	0.657045
2	530580	CATTGGTCATG	0	0	0	0.125468	0	0	0.692244
2	530902	TCTTCGTCATA	0	0	0	0.418226	0	0	0.809573
2	531541	ACTTTGTCATT	0	0	0	0.130696	0	0	0.926903
2	531744	CATGACTATAA	0	0	0	0.156835	0	0	0.856505
2	532763	GATGACTATGT	0	0	0	0.470504	0	0	0.973835
2	532767	ACTATGTCATT	0	0	0	0.454821	0	0	1.02077
2	533003	AATGACGCTCA	0	0	0	0.182974	0	0	0.926903
2	533288	CATGACGGATT	0	0	0	0.0784174	0	0	1.16156
2	533389	AATGACTGATG	0	0	0	0.564605	1	1	2.9215
2	533774	CGCAAGTCATT	0	0	0	0.156835	0	0	1.51355
2	533901	TGTTTGTCATA	0	0	0	0.705756	0	0	1.16156
2	534362	ACAGGGTCATT	0	0	0	0.261391	0	0	1.12636
2	536356	AATGACTCAAA	1	0	1	27.284	0	1	5.49102
2	536420	TATGACCGTTA	0	1	1	34.19	1	1	5.58488
2	536438	AAAGAGTCATA	0	1	1	34.0175	1	1	5.67875
2	536755	TTAACGTCATG	0	0	0	0.292758	0	0	1.11463
2	536859	TATGACAAGGA	0	0	0	0.297986	0	0	1.0325
2	537075	AATGACTTCTT	0	0	0	0.0627339	0	0	0.973835
2	537114	ATTTTGTCATG	0	0	0	0.0679617	0	0	1.0677
2	537743	CTGTAGTCATC	0	0	0	0.219569	0	0	0.962102
2	538049	GATGACGTCAA	0	0	0	0.203885	0	0	0.844772
2	538073	AATGACAAAAA	0	0	0	0.172518	0	0	0.856505
2	538241	CATGACATCCA	0	0	0	0.0993287	0	0	0.633579
2	538301	AATGACGTGAA	0	0	0	0.261391	0	0	0.727443
2	540793	AATGACTTGCT	0	0	0	0.219569	0	0	0.833039
2	541356	TATGACGCATC	0	1	0	125.771	0	0	1.9594
2	541398	GATCTGTCATA	0	1	0	194.444	0	0	1.72474
2	541404	TCATAGTCATC	0	1	0	215.616	0	0	1.70128
2	541458	TCATTGTCATC	0	1	0	279.997	0	0	1.33756
2	541533	TTGTTGTCATT	0	1	0	137.46	0	0	1.07943
2	541539	TCATTGTCATT	0	1	0	114.719	0	0	1.07943
2	542163	TGTTCGTCATT	0	0	0	0.392087	0	0	0.797841
2	542390	TATGACAAATA	0	0	0	0.282303	0	0	0.91517
2	543097	ATGCCGTCATA	0	0	0	0.308442	0	0	0.692244
2	543686	AATGACGTCAA	0	0	0	0.0679617	0	0	0.551449
2	544465	CATGACTACTT	0	0	0	0.747579	0	0	0.950369
2	545525	GATGACGTCGA	0	0	0	0.230024	0	0	0.692244
2	546750	GATGACGCACG	0	0	0	0.308442	0	0	1.0677
2	547647	AATGACGCATT	0	1	0	4.34432	0	0	1.38449
2	548137	GATATGTCATG	0	1	0	33.5835	1	0	2.47565
2	548191	GATGACTAATA	0	1	0	43.5635	1	0	3.0975
2	549925	CATGACCAAGT	0	0	0	0.135923	1	1	2.35832
2	550465	AATGACGCTGA	0	0	0	0.135923	0	0	0.59838
2	551494	TTGTAGTCATT	0	0	0	0.28753	0	0	0.527983
2	551632	TTTAAGTCATC	0	0	0	0.0993287	0	0	0.657045
2	553542	ATCCAGTCATT	0	0	0	0.141151	0	0	0.563182
2	553889	CATGACTTTTT	0	0	0	0.125468	0	0	0.668778
2	554785	GATGACCAAAT	0	0	0	0.250936	1	0	1.94767
2	554854	AATGACTTGCA	0	0	0	0.19343	1	0	2.54605
2	555943	TATGACACCGT	0	0	0	0.0993287	1	0	2.32312
2	556715	TGGAGGTCATC	0	0	0	0.115012	0	0	1.1029
2	557036	GCGAAGTCATG	0	0	0	0.162063	0	0	1.19676
2	558152	TATGACAGCTT	0	0	0	0.209113	0	0	0.821306
2	558689	AATGACTTTTA	0	0	0	0.088873	0	0	0.410653
2	559577	TATGACCCCTT	0	0	0	0.0575061	0	0	0.786108
2	560914	TATGACCCTAT	0	0	0	0.162063	0	0	0.833039
2	561020	GCACTGTCATT	0	0	0	0.329353	0	0	0.833039
2	561109	TCATCGTCATA	0	0	0	0.412998	0	0	0.774375
2	561189	CATGACGTATT	0	0	0	0.130696	0	0	0.51625
2	562198	TGAAGGTCATC	0	0	0	0.0993287	0	0	0.645312
2	562250	TATGACAATCA	0	0	0	0.0941008	0	0	0.539716
2	563395	TGGCCGTCATG	0	0	0	0.0418226	0	0	0.821306
2	563932	GATGACGAAGA	0	0	0	1.69904	0	0	1.23196
2	564548	ATGCGGTCATG	0	0	0	0.501871	0	0	0.879971
2	565102	AATGACTTGAC	0	0	0	0.156835	0	0	0.868238
2	565536	GCGTTGTCATT	0	0	0	0.386859	0	0	0.727443
2	566411	TGACGGTCATG	0	0	0	0.355492	0	0	0.762642
2	566432	AGTTTGTCATG	0	0	0	0.36072	0	0	0.739176
2	566795	CATGACACAAA	0	0	0	0.19343	0	0	0.797841
2	566996	TATGACCGCGT	0	0	0	0.162063	0	0	0.833039
2	567624	AATGACAATTT	0	0	0	0.0731895	0	0	0.786108
2	567664	AAGAGGTCATT	0	0	0	0.0784174	0	0	0.703977
2	568687	TTATTGTCATA	0	0	0	0.0784174	0	0	0.657045
2	569111	GATGACACACT	0	0	0	0.590744	0	0	1.32582
2	569526	CATGACTACAA	0	1	0	5.80811	0	0	0.868238
2	569549	TATGACCAAAA	0	1	0	6.04337	0	0	0.91517
2	569577	GATGACAGTAT	0	1	0	5.58854	0	0	1.00903
2	569885	AATGACTCAGA	1	0	1	4.19272	0	1	4.78704
2	570307	ATCGTGTCATC	0	0	0	0.151607	0	0	0.668778
2	570661	ATCTTGTCATG	0	1	0	5.57286	0	0	0.879971
2	571004	AATGACCATTT	0	0	0	0.125468	0	0	0.527983
2	571158	AATGACTTTTG	0	0	0	0.109784	0	0	0.621846
2	571350	AATGACACATA	0	0	0	0.6012	0	0	1.70128
2	571464	TATGACATATT	0	0	0	0.669162	0	0	1.71301
2	571531	TTATCGTCATC	0	0	0	0.365948	0	0	1.26716
2	571652	AATGACAACCT	0	0	0	0.104556	0	0	0.891704
2	572040	AATGACATGAG	0	0	0	0.115012	0	0	0.621846
2	572138	TTGTTGTCATA	0	0	0	0.104556	0	0	0.621846
2	573225	GATGACCACAT	0	0	0	0.266619	0	0	0.680511
2	573945	TTGTTGTCATC	0	0	0	0.684845	0	0	0.809573
2	574390	TTGCAGTCATA	0	0	0	0.313669	0	0	0.938636
2	574761	TCTTCGTCATC	0	1	0	3.34058	0	0	0.786108
2	574791	TATGACACTGA	0	1	0	3.29353	0	0	0.762642
2	574911	GATGACAAAGG	0	0	0	0.0836452	0	0	0.703977
2	575310	TGCTTGTCATA	0	0	0	0.230024	0	0	0.586647
2	575592	GATGACTTCGT	0	0	0	0.24048	0	0	0.563182
2	576370	CATGACTAACG	0	0	0	0.36072	0	0	1.23196
2	576806	GTAGTGTCATT	0	0	0	0.449593	1	1	1.40795
2	578014	AATGACCGTTC	0	0	0	0.088873	0	0	0.786108
2	579051	AATTTGTCATT	0	0	0	0.125468	0	0	0.633579
2	579201	CCGTCGTCATC	0	0	0	0.324125	0	0	0.727443
2	580407	ATATTGTCATG	0	0	0	0.277075	0	0	0.926903
2	580579	GTTTAGTCATT	0	0	0	0.925325	0	0	0.891704
2	581762	TGGACGTCATC	0	0	0	0.141151	0	0	0.492784
2	582026	TGTCTGTCATT	0	0	0	0.256163	0	0	0.856505
2	582887	TATGACGGGCT	0	1	0	7.22485	0	0	1.09116
2	582947	TATGACAAGGA	0	1	0	2.26888	0	0	0.997301
2	583863	TATGACTTCAT	0	0	0	1.38015	0	0	0.59838
2	583934	GATGACTTCAT	0	0	0	1.15535	0	0	0.71571
2	584522	TATGACAGATA	0	0	0	0.412998	0	0	0.797841
2	584898	AATGACCACCT	0	0	0	0.125468	0	0	0.668778
2	585630	CATGACTACCA	0	0	0	0.0836452	0	0	0.844772
2	586847	GGGAGGTCATG	0	0	0	0.125468	0	0	0.797841
2	587426	ATGAAGTCATA	0	1	1	3.02168	0	0	1.75994
2	587517	TATAAGTCATT	0	0	0	0.203885	0	0	1.23196
2	587849	TCATTGTCATT	0	0	0	1.05079	0	0	0.797841
2	588413	ATGCCGTCATT	0	0	0	0.0941008	0	0	0.727443
2	588560	GAAACGTCATC	0	0	0	0.559377	0	0	0.762642
2	588956	GTACGGTCATC	0	0	0	0.486188	0	0	0.750909
2	588996	AATGACCTTCG	0	0	0	0.575061	0	0	0.809573
2	589986	GTAAAGTCATC	0	0	0	0.188202	0	0	0.703977
2	590570	CATGACAGGAA	0	0	0	0.109784	0	0	0.668778
2	590928	CATGACTACCG	0	0	0	1.00897	0	0	0.59838
2	591047	CAAAAGTCATC	0	0	0	0.0627339	0	0	0.71571
2	591209	TATGACCTGGT	0	0	0	0.345036	0	0	0.668778
2	591233	AATGACATATT	0	0	0	0.339809	0	0	0.610113
2	591954	GATGACGAAAT	0	0	0	1.06648	1	0	1.77168
2	591967	CGAACGTCATC	0	0	0	1.06648	1	0	1.66608
2	592089	AATGACCAAAG	0	0	0	0.371176	1	0	1.47835
2	592819	AATGACTTCCA	0	0	0	0.214341	0	0	0.527983
2	593836	CAAGCGTCATT	0	0	0	0.109784	0	0	0.621846
2	594439	CCGGCGTCATT	0	0	0	0.203885	0	0	0.457585
2	594732	AATGACAGCAA	0	1	0	1.2965	0	0	0.833039
2	595896	CATGACATAAA	0	0	0	0.0365948	0	0	0.328523
2	596380	TATGACACTGA	0	0	0	0.266619	0	0	0.762642
2	596904	TAAGGGTCATT	0	0	0	0.130696	0	0	0.668778
2	597145	AATGACGAATC	0	0	0	0.0522782	0	0	0.680511
2	597213	AATGACCCAGC	0	0	0	0.0627339	0	0	0.657045
2	598160	AATGACTTAAT	0	0	0	0.428682	0	0	0.962102
2	598886	TATGACGATTC	0	0	0	0.412998	0	0	0.774375
2	599576	AATGACGTGTT	0	0	0	0.376403	0	0	0.762642
2	600186	AATGACTCCAT	0	0	0	0.941008	0	0	0.739176
2	602890	TATGACCATCC	0	1	0	2.71847	0	0	1.0325
2	602911	GGTGGGTCATT	0	1	0	2.24796	0	0	1.00903
2	603328	TATTGGTCATG	0	0	0	0.758035	0	0	0.750909
2	603964	ACCGTGTCATA	0	0	0	0.313669	0	0	0.821306
2	605584	ACTTTGTCATT	0	0	0	0.747579	0	0	1.34929
2	605647	GATGACATGGC	0	1	0	2.84916	0	0	1.65435
2	605662	GATGACACAAG	0	1	0	3.03214	0	0	1.64261
2	606170	GGAGTGTCATG	0	0	0	0.156835	0	0	0.422386
2	606285	CGTATGTCATT	0	0	0	0.726668	0	0	0.71571
2	606489	TGTAAGTCATT	0	0	0	0.355492	0	0	1.0677
2	607326	TTCATGTCATC	0	0	0	0.805085	0	0	0.903437
2	607976	ATTATGTCATT	0	0	0	0.28753	0	0	0.739176
2	609978	TCAAAGTCATC	0	0	0	0.0679617	0	0	0.71571
2	610195	AAAAGGTCATT	0	0	0	0.0522782	0	0	0.71571
2	610695	CAAGGGTCATG	0	0	0	0.444365	0	0	0.692244
2	610738	TATGACCACCA	0	0	0	0.433909	0	0	0.645312
2	611517	CTGATGTCATT	0	0	0	0.0731895	0	0	0.551449
2	611604	GATGACCATTT	0	0	0	0.297986	0	0	0.551449
2	611617	TATGACCCAAC	0	0	0	0.313669	0	0	0.551449
2	612328	GATGACTTTAG	0	0	0	0.16729	0	0	1.02077
2	613001	AAGTTGTCATA	0	0	0	0.266619	0	0	0.797841
2	613381	CATGACTGGAC	0	0	0	0.271847	0	0	0.668778
2	615142	CATGACTTCCT	0	0	0	0.156835	0	0	0.481051
2	615199	TACATGTCATC	0	0	0	0.548922	0	0	0.457585
2	615278	TCCGGGTCATG	0	0	0	0.397315	0	0	0.387187
2	615978	GATGACTGAGC	0	0	0	0.292758	0	0	1.50182
2	616564	AATGACGGGCG	0	0	0	0.203885	0	0	0.692244
2	616679	AATGACACACA	0	0	0	2.83871	0	0	0.621846
2	616742	CATGACCATAA	0	0	0	0.951464	0	0	0.481051
2	617117	CATGACATGTC	0	0	0	0.36072	0	0	0.633579
2	618143	GATGACAAATT	0	0	0	0.135923	0	0	0.657045
2	619730	TATGACGTTTT	0	0	0	0.0993287	0	0	0.926903
2	619757	AATGACAAGAT	0	0	0	0.115012	0	0	0.973835
2	619942	AACTTGTCATT	0	0	0	0.0470504	0	0	0.621846
2	621366	TATGACTTTAA	0	0	0	2.29502	0	0	0.91517
2	623901	GATGACCAGCA	0	0	0	0.271847	0	0	0.563182
2	624930	AATGACCTTCT	0	0	0	0.0679617	0	0	0.59838
2	625342	TGAATGTCATA	0	0	0	0.0993287	1	0	1.87727
2	626023	GATGACATTCT	0	0	0	0.156835	0	0	0.492784
2	626745	AGTGGGTCATA	0	0	0	0.250936	0	0	0.891704
2	627260	CTGCCGTCATG	0	0	0	0.214341	0	0	0.762642
2	627595	GATGACGACGA	0	0	0	0.151607	0	0	0.563182
2	628189	GATGACGGTAC	0	0	0	0.318897	0	0	0.621846
2	628525	TATGACTGCGC	0	0	0	0.569833	0	0	0.985568
2	629314	AAACTGTCATC	0	1	1	15.0561	0	0	1.33756
2	629349	ACAGCGTCATG	0	1	1	25.7941	0	0	1.45489
2	630379	ATCATGTCATC	0	0	0	0.810313	0	0	0.680511
2	630520	ACAAGGTCATC	0	0	0	0.329353	0	0	0.868238
2	630559	ATTACGTCATC	0	0	0	0.559377	0	0	0.891704
2	630661	GATGACTTTAA	0	0	0	0.115012	0	0	0.739176
2	630927	GATGACATCTT	0	0	0	0.0993287	0	0	0.774375
2	631005	TATGACCGATT	0	0	0	0.412998	0	0	0.879971
2	631300	AATGACATTGT	0	0	0	0.12024	0	0	0.821306
2	631792	GATGACATTGA	0	0	0	0.313669	0	0	0.762642
2	632831	GATGACATGCC	0	0	0	0.214341	0	0	0.680511
2	632879	TATGACCGTTA	0	0	0	0.214341	0	0	0.645312
2	633008	TATGACCAAAG	0	0	0	0.188202	0	0	0.680511
2	633999	AATGACCAACC	0	0	0	0.282303	0	0	0.621846
2	634296	TATGACATATT	0	0	0	0.334581	0	0	1.04423
2	634484	TATGTGTCATT	0	1	0	5.29056	0	0	1.44315
2	635215	TTGTTGTCATT	0	0	0	0.0941008	0	0	0.657045
2	635698	TTTCTGTCATG	0	0	0	0.0522782	0	0	0.71571
2	636621	TATTCGTCATT	0	0	0	0.203885	0	0	0.504517
2	636723	TATGACGGCCA	0	0	0	0.418226	0	0	0.657045
2	637154	CTTCAGTCATT	0	0	0	0.256163	0	0	0.621846
2	638769	AATGACAGTTT	0	0	0	1.06648	0	0	0.527983
2	638833	CTGTAGTCATT	0	0	0	1.22331	0	0	0.51625
2	640747	GATGGGTCATA	0	0	0	0.292758	0	0	0.774375
2	641322	TATGACGTTAG	0	0	0	0.0731895	0	0	0.657045
2	642136	GATGACTTGTG	0	0	0	0.177746	0	0	1.02077
2	642206	TAACTGTCATT	0	0	0	0.104556	0	0	0.91517
2	643459	AATGACATCAG	0	0	0	0.182974	0	0	0.774375
2	643585	GATTGGTCATA	0	1	0	8.3802	0	0	1.36102
2	643601	CATGACCAATA	0	1	0	9.16438	0	0	1.41969
2	644738	GATGACCAACT	0	0	0	0.334581	0	0	0.868238
2	644851	AATGACATCAG	0	0	0	1.18672	0	0	0.891704
2	644972	GATGACCAACC	0	0	0	0.365948	0	0	0.950369
2	645042	CTTCAGTCATT	0	0	0	0.125468	0	0	0.868238
2	646048	AATGACCTTAT	0	0	0	0.0470504	0	0	0.31679
2	646275	TTTGAGTCATC	1	0	1	8.01948	0	0	1.67781
2	646419	TGTAAGTCATG	0	0	0	0.12024	0	0	1.34929
2	646576	CTCTGGTCATT	0	0	0	0.115012	0	0	0.962102
2	646912	CATGACGGTCC	0	0	0	0.203885	0	0	0.903437
2	647092	AATGACTGCCC	0	0	0	0.397315	0	0	0.891704
2	647693	ATATTGTCATA	0	0	0	0.386859	0	0	0.668778
2	648320	GCCCTGTCATT	0	0	0	0.115012	0	0	0.762642
2	648562	GATGACTGACC	0	0	0	1.02988	0	0	1.56048
2	649778	TATGACGTGTC	0	1	0	28.2825	1	0	2.065
2	649795	GATGACTCCTC	0	1	0	27.7388	1	0	2.15886
2	650149	CTGGCGTCATA	0	0	0	0.737123	0	0	0.821306
2	650221	GATGACTACGG	0	0	0	0.914869	0	0	0.692244
2	650702	AATGACCTGTA	0	0	0	0.209113	0	0	0.563182
2	651115	TCAAGGTCATG	0	0	0	0.130696	0	0	0.387187
2	651683	TATGACCCAGA	0	0	0	0.684845	0	0	0.821306
2	651705	TGTCTGTCATG	0	0	0	0.72144	0	0	0.797841
2	651897	AATGACCTTAA	0	0	0	0.0784174	0	0	0.692244
2	652118	GATGACCAAAG	0	0	0	0.0941008	0	0	0.657045
2	652279	CCCGTGTCATC	0	0	0	0.224796	0	0	0.797841
2	652357	TTGCAGTCATC	0	0	0	0.533238	0	0	0.938636
2	652471	TTTCTGTCATT	0	0	0	0.203885	0	0	0.926903
2	652629	TCGGCGTCATC	0	0	0	0.256163	0	0	0.821306
2	652722	TCAAAGTCATC	0	0	0	1.25468	0	0	0.762642
2	652766	GATGACAGCAA	0	0	0	1.47947	0	0	0.797841
2	653064	AATGACTAAAA	0	0	0	0.109784	0	0	0.821306
2	653834	GATGACTACTA	0	0	0	1.02465	0	0	0.703977
2	655149	TATGACGTTGA	0	0	0	0.282303	0	0	0.610113
2	655597	AAATAGTCATT	0	0	0	0.0365948	0	0	0.610113
2	655822	CAACAGTCATG	0	0	0	0.669162	0	0	0.692244
2	656948	CATGACTATAC	0	0	0	0.115012	0	0	0.71571
2	657583	AGTATGTCATC	0	0	0	0.616883	0	0	0.574915
2	657828	AATGACAGTAT	0	0	0	0.52801	0	0	0.962102
2	658679	CAGATGTCATA	0	0	0	0.0784174	0	0	0.51625
2	659917	ATGCAGTCATA	0	1	0	15.1189	0	0	1.25543
2	659946	GCGGAGTCATG	0	1	0	15.1136	0	0	1.16156
2	659953	CATGACTGTGA	0	1	0	13.8276	0	0	1.16156
2	660680	GATGACATTGC	0	0	0	0.214341	0	0	0.844772
2	662345	AATGACGGGCC	0	0	0	0.109784	0	0	1.65435
2	662617	GGTTAGTCATA	0	0	0	1.19194	1	0	6.75818
2	662774	GATGACCTTAA	0	0	0	0.230024	1	0	2.62818
2	663299	ACAATGTCATA	0	0	0	0.146379	0	0	0.527983
2	663555	GATGACCTTGT	0	0	0	0.0418226	0	0	0.469318
2	663877	CCGTCGTCATA	0	0	0	0.559377	0	0	0.621846
2	664123	AATGACATAAA	0	0	0	0.0575061	0	0	0.59838
2	666135	TGACGGTCATC	0	0	0	0.151607	0	0	0.621846
2	666492	CATGACTTTTA	0	0	0	0.203885	0	0	0.539716
2	666502	AATGACGGAGA	0	0	0	0.162063	0	0	0.551449
2	666886	CGTAGGTCATT	0	0	0	0.0575061	0	0	0.657045
[truncated: 23,842 more rows]

## Sheet: Table S2
2021-07-02
Coey & Clark: Table S2: List of ChIP-seq peaks observed by Rawal et al. (2018). Supplementary Data with G-SELEX data for comparison
Rawal = data from Rawal et al. Add File 117.xlsx
546 ChIP peaks, of which 371 have an AP-1 motif (18 peaks have 2 motifs).
Rawal	Rawal	Rawal	Rawal	Watson strand	Central base	Central base	Watson strand	Watson strand	TGACTCA-strand	TGACTCA-strand			Rawal: Induced Gcn4 ChIP	Rawal: Rpb3IU	Rawal	Rawal
Peak_No	Chr_No	Peak_start	Peak_end	Peak_Sequence	Mid_Motif_Coord.	Second_Motif_Coord.	Motif_sequence	Second_Motif_sequence	Motif_Flanking_Bases	Second_Motif_Flanking_Bases	Motif_Type	Second_Motif_Type	Norm. Motif Occupancy	Rpb3 Induction Ratio	NearestTSS	CommonName	G-SELEX_peak
Peak_1	1	18235	18470	TGATTAAGCTTTGGCCGCTAAGTCTCTCAATTAGTGTTGATTTTGGTTTTATTCATATGATTCTTCTTTAGTGAAGTATTGATCAATTACGTGAGTCAGCTTTTTGAAAACCCCATTTGGAAGGAATTAGGAAATTATTTTGCTTACTACGACCACTAATTTACCGCCATTTCTGGGCCTTTTTATTGACTATTTTGACCATGTGCTCGACTAGAAGAACGGCATCATAATCTGCT	18329	-	GTGAGTCAG		CC		RR-YY		3.08577	1.00667	YAL064W	YAL064W	G-SELEX
Peak_2	1	19302	19696	CAAGATCTGTTTCTCTAAGATATTAAAGTTGAGTAAAAACAAAGCTGATATGAGAAAAATACGTAATTGCTCCACATAATACGTGGGTCAGACATAAAGGTAGAATACTTGATACAGAAGAGATTATTCGGTACTCTTGATGGCGTGCTTGAACTGGTGCCTCTTAACAACCGGTAATATAGTCAGATGAGTCACTACGAGTGTGTGTAGTAGCAAGTGTTTTACCTACGTGGCAGTAAGAGTAGCTCTATGGTTGTGTAATAGTGGTGCTTATTCCTAATGCTCTGAAGTCTGAAGCGGTACAGTTGGTCTGGTCTATATCATGGTCAAAGGAGCAAACATATCTTCTGAAGTGACCGCAAATAGTACTATGATGTGGTTGGCAATATAACTTA	19492	-	ATGAGTCAC		GT		RY		9.03437	1.00667	YAL064W	YAL064W	G-SELEX
Peak_3	1	22053	22364	ACATAAAAGTGGTTTAAGTACTATATATCAGTGAAGCTTCAAAGTAAGCAAACGAGATACCAAGATCTTGTAGGACCACGATATATAAGAAGCCTAGTTCCGTTGTAGCATCACATAGAAGAGAGCGACAATGCCTCAGAAATTCTACAGCAACAGAAAGCACAGTGAGTCATTAACTGTTGGAATAAGACTCAACTGCGAGCTATCGACTAGTACTTATATTACTAGTATATTATATACGGTGTGAAAAGACGACATGAAGATTGAGGAAATGGTCCCAAGATCTAATGGACACTGAAATGCAAAAGTTGA	22221	-	GTGAGTCAT		AC		RY		4.36466	0.47209	YAL063C-A	YAL063C-A	G-SELEX
Peak_4	1	54820	55264	TCCGCTATTTTTGTTTTCAATTTTTATTTGTTTAATATACAAATTTCATTCTTGTTTTGAGGGTAAACCACTATACCAAATGTTGAAGATCTAAAGGTATCGATCAAATATGTTGCTAGAGAGTGACTGAGTGTTACATTAAATATATTTATATATAAACGTATGATATTTAGGGATTGTTGATTGATAGGTTGAAAAGTTTCGATCTCAATGACTCATTTTCCTGTTCTAAAGCCTTGATTCGAGCTTCTGAAGCGTTAGCATCGAGCTTCCGTCTTTCTCTTTCGGATATCCATCTTCTTTGTAACTCCTCTATTCGTAAGGTCAGTTCTTTATTTGGAGTTGCCGTTAATTCATTGCCCTGTTGATGTGGCTGCTCTGGGGTTTCCATGGAAATCA…	55034	-	ATGACTCAT		AT		RY		10.3485	2.5095	YAL048C	GEM1	G-SELEX
Peak_5	1	75011	75257	TTTCATTTCTTATATTATTTTTTGTTCGAGAATCACTTTTTCAAGATGGTAACAACATCTTCGTCTTCCAAAATGTGACTCAACCCCACGTATTGAGGTTGATGTTTGACACTGCTACCGTAAACCAGAGCATTTCTAAAGTCGTCCACTAAAGATTTATGAATTTGGTTACAAAAATCCTTGACACTGCAACGGTCTGATCTTAGCACCACAGGGTCGGTAAAATCTGGTATTTGGCCCTTTGGTT	75089	-	GTGACTCAA		GA		RR-YY		2.41699	0.505948	YAL036C	RBG1	G-SELEX
Peak_6	1	89170	89612	GCAGCCAAACTTTGCATATGTGACTGTATTAAAGAAGATTGCTTCTTTTTTCTCTCCTTCAAGGCATTCTTCTTGTTTAAAGTATTCATGATTTCAACTTGTAACGTCTTCAGCTTGGAAATCTTATCATTATAACCATTTACTATCGTTTCGTACTCTTGCCTTTGCTTAGATGGAATATTTGACAAATCTCCCTGCAACAACTGTGTTAATCTTGTATATGAGTCATTTAACATCTCTAGATTCAAAATGAAAGAGTTCTTAAATTCGATAGCTTCCTCCAGTAATCCAATCCCGTAACTAGCCCTAATATTCCGTTCTTCAACTTCTTTTTGCAGAACTATATACCTTCGTCTAGCTAACTGCATTCTCATGGCGCTTTGTACAAGAATGGAGCTC…	89394	-	ATGAGTCAT		AT		RY		13.0588	1.15629	YAL030W	SNC1	G-SELEX
Peak_7	1	99083	99448	GGTAGATATATGGTTGTCACTATAACCGAAGGAGGAATTAGCGAGAGAATCGTTGATGTGGATGACTCTTGGTTCACCATTGCCCTCTGCGTCGCCAACGTTCTTTCTTAAAATGTACCGGTTGAAAAGAATTTTAATGTTGAACTTATTCCTCGAGTCTAGATAATTATCGTCTAATTCGTTATTAGTCACCGCATTGTAATGATTCATTTCGAAACTTTCGGGCCCTTTCTTCCGTTTGAACGTAAAGGCATTTTTGAGACCATTACCAAACCTAGCAAATAAACCGGGAGGCTTGACTGCTCGTAGGGATTGTGGTTGATATGCATCTGAGTCGAATCTATTGGCATTCCAAGACGTTTGGTC	-	-							-	1.48316	YAL026C	DRS2	G-SELEX
Peak_8	1	115325	115832	AGAAGTCATTACCACTGGCAAACACAGGCCGTTTATCATCTATCCATGGCAATATCAACAACAAATCCTCCAAGATTACCGTGGCCAAACAGAAAACGTCCATTTTTGACCGTTACTCAAACGTCATCAACCAGAAACAATACACTTTTGAGCTGCCAACTAACTTGAATATAGACTCGGAGGCACTGAGCAAGTTGCCCGTGAACTACAACAAAAAGAGAAGGCTGGTAAGGGCAGATCAGCATCCAATTGGCAAGTCTTATGAGTCATCCGCTACACAATTAGGTTCTGCAAGAGAGAAACTACTGGCGAACCGCAAATACGGTCGTCATGCAAACGACAACGATGAAGAGGAGGAAGAGAGTATGATGACGGACGATGACGATGCAAGTGGCGACG…	115590	-	ATGAGTCAT		AT		RY		18.9487	0.93171	YAL019W	FUN30	G-SELEX
Peak_9	1	129160	129450	ATTTTATTCTTATAAAATGATTTTTAGAAATAATAAACTCATAACAGTGCAACGGCAAAGTACAAGGGAAGGAAGCACAGAAGCAAGAGGAGGCGCATCGATCGTGGCAGATGAGTCAGCAAACACCACAGGAAAGTGAACAGACCACAGCGAAAGAACAGGACCTTGATCAAGAGAGCGTGTTGAGCAACATTGACTTCAATACGGATTTGAATCACAATTTGAATTTATCGGAATACTGTATATCCAGTGACGCAGGAACAGAGAAGATGGATAGCGACGAGGAGAAGT	129274	-	ATGAGTCAG		CT		RR-YY		3.25003	1.38611	YAL013W	DEP1	G-SELEX
Peak_10	1	197185	197492	TTTATTAAAACTGTAAGAAAATTTTATCATGAACTCTGATGAAAAGTCTTCGGAAGATCAACTTTTTGATTTTTCAAAAATGAAAGAAACTGTTGTCTCCATTTATGGCCTCATATCTGAAGGAAATTCGTCTGCTATTAGTCATACCACTATCTTCTTCTTGAAGCTGCATTTCAAGGTTGATTAGGAAGCATCTAACAATCATTCGATAGGGAAAACAGAAAGGCCGTTACAGTTTTTTAAAAATATCAATATCAAGAGAAAGAACTAGGGATATTGCAAAATCAAAACTTCTGATATTTGGTTTT	-	-							-	0.853438	YAR042W	SWH1	G-SELEX
Peak_11	1	212397	212835	TCCTTGTGGTTATTTCCTTTTAGGTTATATTGCCAACCACATCATAGTACTATTTGCGGTCACTTCAGAAGATATGTTTGCTCCTTTGATCATGATATAGACCAGGCCAACTGTACCGCTTCAGGCTTCAAAGCATTAGGAATAAGCACCACTATTACACAACCATAGAGCTACTCTTACTGTCACGTAGGTAAAACACTTGCTACTACACACACTCGTAGTGACTCATCTGACTATATTGCCGGTTGTTAAGAGGCACCAGTTAAGCACGCCATCAAGGGTACCGAATAATCTCTTCTGTATCAAGTATTCTACCTTTATGTCTGACCCACGTATTATGTGGAGCAATTACGTATTTTTCTCATATCAGCTTTGTTTTTACTCAACTTTGATATCTTA…	212621	-	GTGACTCAT		GT		RY		16.1093	0.871812	YAR064W	YAR064W	G-SELEX
Peak_12	1	213651	213921	TCTAGTTGAGCACATGGTCAAAATAGTCAATAAAAAACGCCCAGAAATGGCTGTAAATTAGTGTTTGTAGTACACAAAATAATTTCCTAATTCCTTCCAAATGGGGTTTTCAAAAAGCTGACTCACGTAATTGATCAATACTTCACTAAAGAAGAATCATATGAATAAAACTAAAATCAACACTAACTGAGAGACTTAGCGGCCAAAGCTTAATCATCATTACATAGAGTATATGAAGGGAGTAAGTGAATATGCAAGGGTGGGAAACGGC	213772	-	CTGACTCAC		CC		RR-YY		3.68415	0.871812	YAR064W	YAR064W	G-SELEX
Peak_13	1	220969	221278	GTCCAAGTTTTCATCTTTGCAAGCTTTACTATTTCTTTCTTTTTATTGGTAAACTCTCGCCCATTACAAAAAAAAAAGAGATGTTCAATCGTTTTAACAAATTCCAAGCTGCTGTCGCTTTGGCCCTACTCTCTCGCGGCGCTCTCGGTGACTCTTACACCAATAGCACCTCCTCCGCAGACTTGAGTTCTATCACTTCCGTCTCGTCAGCTAGTGCAAGTGCCACCGCTTCCGACTCACTTTCTTCCAGTGACGGTACCGTTTATTTGCCATCCACAACAATTAGCGGTGATCTCACAGTTACTGGTAA	-	-							-	0.810214	YAR066W	YAR066W	G-SELEX
Peak_14	2	23745	24322	GTACTAACCTGCAGTAATATTGGAGATCCTACTGTCCGGACCGAGTAGTACAATTGTTAGTTTCTGTTGCTCATAAGAAGGCTTTTCTAATCACCATGGCTTTATTATTTCAAAAGTAACTTGCGAAGAGTCACATCCCGCGGAACGGCCCGCAATCGTGACCCGGCAAAAGGCGATTGTAATGAAGAGGGAGTATTGGTCAAGACTTGTACTATACTGAAATAGGAAGAAGATTGAATAAATTTGCATTCTAATTGCGTTCGGTAGTTTAGAGTAGGACTTAGATTACCTGTATTGTCTGCAGTTGCGTTTTTTTTTTTTGCTGGTAAAAAAAAAGAACAAGTGTGGAGAATATGAGCGAGGAACCACCTTCTGACCAGGTCAATAGTCTCCGTGACT…	24142	-	GTGACTCAT		GT		RY		8.084	2.80705	YBL102W	SFT2	G-SELEX
Peak_15	2	84165	84504	ATTCTAATGAAGTATGAAAGGCATCTATTTCATCCCAAAGAGATAGAACTTTTTCTTCCTCCTTTGGAAATGAGAAGTGTGCGTTACTCTCGGACATATTTCCTTGGTTTTTTGAAGCTTTTGGCTAAAGGTTGTAGGAAGTCGAGTAACATCACTCTAGTTTAAAGCGCAAAATGATATTTTTCATGCTTAAGAGTCATCATTGTTTCGAGATTTCTTGCGTGCTGCGGAAACAAAAAAAAAAAAAATTTTTCGTCATCATGGATAGATTACCCGCCATCGTATAAAAGGTTAAACATAAAAAGTAGCTAAATAGAACACTATAGAAGAATAATCAATC	-	-							-	1.38232	YBL076C	ILS1	G-SELEX
Peak_16	2	99287	99527	TTTGAATTGGAGAGAAGGGGCCGTTCGGAGTGTTACCTGCAGAGTTGTTCTTATAAAAAGCCATTTGCAAAGCAGGAGGTAAAGATTCTTTTGAATTATTAGGCAATGCTGAGTCATTTAGCAGCGGGGGCAGCTTATTTGGCTCTGTTGCAACCAAGCCTTTCGAATCTTGCGCTAAAGAAGATGCGCGCAACGTCATGTGAGAAGATGCTTCATTATTTGCTTTAAATTTATTCGTATT	99399	-	CTGAGTCAT		AG		RR-YY		2.66338	1.21493	YBL066C	SEF1
Peak_17	2	114553	114786	ATCTAGAATCGTAGATGTTTGTTGTTCACCCACAACTGAAGGCTCAGGAATTGGCTGTGATAATATGAGTATTTCCATTGTTGCTTTACTAAAGGAAAATGAATCTGAGTCACAATGGTTTGAGCGTATGAGATCAAAAAATTACAATATCCAAACGTCTTTTGTCCAAAGAAGGAAAAGTATTTTTGATTTCCATGATTTTTCGGATGATGATAACGAAGTGTTCGCAATAAC	114661	-	CTGAGTCAC		GG		RR-YY		2.81591	0.919748	YBL056W	PTC3	G-SELEX
Peak_18	2	135922	136303	CCAGTCCGGGTTATGTAAATCGTGAAAAAGAATATCTGGTTTTAAAATCTCTCTTTTCTTTTTCCCCCTGGTGGGTATGGGTGAAATGCTAGAGAGGCAAAAAAAAAGGTTGCCAAGTAAAGCGAAGTATTTGAAGTATACTGCAAGCATCACCGAAACAGGAAATCACGAAGCTGACTCATCTGTGATTTTCCGTCCCCACCATAGTGATGTAACATGCAGTAACGCACGGCGGGCCGAAAGTCGGACTTTACCCCAGATTTGTAGTTGTATCCTATTGGATCACGGGCGACGGACAAGACCCGAAGTGCGGACCGGCATGGTCAGCTTGCACGGAAGCTTTAAGGGTTTCCCTTGTTTCGGCATTAGAAGAGGCATTTCG	136099	-	CTGACTCAT		CT		RR-YY		12.4604	0.53109	YBL044W	YBL044W	G-SELEX
Peak_19	2	137610	137893	TTACTTCATAACGTTCAAAATAAAGTTTTTAGTTTAAAATAAAATAAAATAAAAAAAAAAAAAAAAAAAAAAAAGAACCTTTTGTTTTCGCCCAGTATATGGGTAAATTAACGGTTCCTTTTATTAGTCATTTTCAACTCTATACCATGCTCCAAAACGGCGTTCGGCACAGGTTTTTTATTTTACCACGATAACTCAATATGTACAAGATTATTGCATAGGCGAAAAGTAAAGTTTTAATATGGTACTTTGCGCAATAAAACTACGAATTCAAACGTAAAATA	-	-							-	7.13538	YBL043W	ECM13
Peak_20	2	159594	159870	CTAGAGGCAAGCCGCCATCGCCGTTCCTGCCATCACCCGTACCACTAACCTCGTATTTGCTGCTATCCTGTTTACTGTTGTCGTAGTTATCTATGGTCATCCTGTAGGTTTGTTGTAGTTTTATGTACGCCACTTTTTGTAATGACTCAATTATTGTCCACGCCAGCACAGCAACTTCTTTATATATACTATAGCGGCGCTGGCGCTCACCCCACAAGAGCGTCCGACTAATTTCTGACAAATCGTAAAAAGAAAAAGAAAAACTCAAAGGAAAAAG	159739	-	ATGACTCAA		AA		RR-YY		2.34659	1.86014	YBL033C	RIB1	G-SELEX
Peak_21	2	306898	307166	GATACGTCTCAGGAGCAAATATGATTGGCTTTTGGGTCTCCTCAGCTTGTTTAGTCATTTTCAGTGCAGATCCGTGAAGTGTACTACTGGTCTAGGTAGAGTATCTTTAAAATATCTAATCATGCAAATTAGTCATTTCTTCTTTCTTATAAGTTGCGGCCCCTTCTAGTATTTACAATTTACCCGGCGCTGGTTCTGGTGGCATCTATAAGAGCTCTATCTGGCTGCTAAGCAGACTTGCTGTTACTTGTATGTGCTGTTTATCAAGA	-	-							-	2.11232	YBR035C	PDX3
Peak_22	2	311700	311973	TTGAGTATGATAGCATCGATATTGAAATTTACAGAACTTCAATTTAGTTTCAATTGGGAATTCGAGGACTCTCCCTTGGGATGGCCCCAGTCTATTTAACTATCTTCCATAATATTACTGTTGATTTCGTGACTCAGAAGAGAAAACAGAGGAAGTTACATATAGACCCAAATAAAAACCAAAGAACCACATATAGAAATGACGAGAAACCCGTTTATGGTGGAACCTTCGAATGGCTCTCCTAATAGACGTGGTGCTTCAAACCTCTCCAAAT	311832	-	GTGACTCAG		GG		RR-YY		2.88631	0.586921	YBR038W	CHS2
Peak_23	2	324088	324580	AATCGATAATCTTTTAATATTTTAATCTAATCGCAGTTATCCAAAACTGGAATGAGATGGTTCAAATCCCCAAAGGTAGATGGAGTTACTGCTGAGGCGTGGAAAAACCCGAGTTTTTCCGAAGCCGCATATGAGAAATTGAGCAGGAATAATAGATATTTACGAAGAGGTAAAAGTGATAAAAGGCAGCGCCGTGGCAATATCTATTTACAATGACTCATTCTGACTATTTAAAAGTATGTAAGGGCTTTATCTAGGCTTTGTGCCGTTCAGGCTTTTTGTATACACATGTGATAATTGTATTACAGCTTGTAAGTAATTCAATGAACGTTTCTACACCGGCTAAACAAGAATCCATTTTGCTCCATGGCTCCAAGTTTCCATCCTTTACTGTGTTCA…	324304	-	ATGACTCAT		AT		RY		16.0859	1.23574	YBR043C	QDR3	G-SELEX
Peak_24	2	331530	331810	GATCTCGTCTCTTAATGCTTACTAGTAGCTTCAAAATATCTACTTTGCAAACCGCAAGGAGATCTCACTTTCAAGATATAGTATTTGTAAGAGGGGAAGTTAACGCTCGGCTAAATCGTTCGGATCGACACCGAGCGGCACGTACTATATTATCCGAACTGATTACTCATCTAGAAATGAAGGGTGCAACTTCTAATGTCACGCAAGAAGTGAAAGTATTATTCATGTTATACCTGAATAATAATCATATGTAGGAGTAAATCTTTGTTCTGTGAACATAA	-	-							-	4.53249	YBR047W	FMP23	G-SELEX
Peak_25	2	358931	359204	TTCTTTCTCTTCTTCAAGTTCTTGGCCGACATTTTGAGATGGTATTCTAGAAACAGCGGCATGACCGTCACTAGCGTTCATGGGAAGTTTGGATGAGATTTCAAAAGAAGAAAGAAACATGTCATTCAGTAAGTTTTCTTCTGAGTCACTCAATTTATTGTTCTGCATAATTTTCTTTTGTTGTAGCTGGTACATTTGCAATTGAACATTTTGTAATTTATTCTGAAACTGCGTATATTTAGAAAAATTATAGGCACCTTCCGCATACTTATCC	359075	-	CTGAGTCAC		GG		RR-YY		2.9567	1.36001	YBR059C	AKL1	G-SELEX
Peak_26	2	363542	363788	ACATCGCCCGTTATATCAGACGATTTTTGGATCAAAAAAAGTTTATTGGAGCAGAAGCAATTCTGAAATGAAGGTCCTAATATGACCCCAATATGACACATAATTCGGAATCTGCCACTTGTGAGTTTTATCAAGCCTATGCGGATGTTTGTGACTAGTTGGATATGACTGAATTAATACTTTCAGAAATGGACAAGGAGATATGTGATTCTCTATTATCAAATACCATTTGAACCTTACTGGTCCA	-	-							-	0.965446	YBR060C	ORC2	G-SELEX
Peak_27	2	374730	375292	TAGATTTTCTAGGGTTAGACTGTTCCTGAACACTTAGTGCAAATAATTCCATACCACCAAAGGAGAAGTAAGCAGTAACTAAAATATAGCAAACGTTTTTGAACCTACCAATCGATGTGTCACCTGCAAAAGCACCTGGATTATGCCAATAAGTGGCCCCGATATAACCGTCATTTCCGGCCCCACCACAGTTGATAACAATAGAAAGAATAATGAAACCTGCAATCATTAAAATTTTACAGCAATTGAAGATGAATTCCGTTTCACCATAGGCTTTTACACCGAAGAAATGAATGAATACTAAGAAAACATAGAAAATAAGAATATAAATGTCCGGATTTATTTTATCATTCCAAAATTGAATAGTCATAGACGCGGTTATTAACTCTAAAGGCAAAA…	-	-							-	1.3196	YBR068C	BAP2
Peak_28	2	375758	376092	AACACTAGCTAGAGATAGTAATAATCTAATGGCAAAATAGCCATTATACGTACCTAATATATACGTATATATACGAGGAGATGTGCTCATCAAAGAAGTGGCATTTCACCCTGAAATTTTTTTTCTTTTTCTCGCTGAAGAGTCATTCCTAGTAAAGCATGCTACTTTTCAGTATATTCCATTATATTTTTAACTACAAGCGGCGCAGAAACCAGAGGATCAGCCACTGCTAGCAGCATTTGCTGCTGACATATTTACCGTTGAAGGCCATCATAAGGCAGTGTTCTGCGGGGAGTTGGAATGTGGATGCCGGTTCCGGTCCCACAAAATATGAG	-	-							-	1.3196	YBR068C	BAP2
Peak_29	2	383993	384242	ATTCTTGCGCCCTCATCAGAGGGAAGGGGTGAAGTTCATGTATGATTGCTTAATGGGCTTGGCAAGACCAACTATTGAAAATCCGGATATCGATTGTACTACTAAAAGTTTAGTGTTAGAAAATGACTCAGATATTAGTGGATGCCTTTTGGCTGATGATATGGGTTTAGGTAAAACACTAATGAGTATAACTTTGATTTGGACATTAATTAGGCAAACTCCTTTTGCATCAAAAGTTTCATGTTCGCAA	384119	-	ATGACTCAG		AG		RR-YY		2.86284	0.578447	YBR073W	RDH54	G-SELEX
Peak_30	2	386407	386868	AACTCAATCTACCAAAAGAGGATGAGCACCCTGAATTCAATGACTTATTAGAAACAGCATGGGGGGACTTACAGATTATCACGGCCTCTTTTCATCCGTACACGTCCAAAGAAAATGATAAAGTACATGATTACTTGCTCAAAAGGGTTCTTGAAATTACAGGGAATTCTTCGTTTGCAAGTGTTTCAGATGACAAAGAAAGCGAGAGATCCATATTATTTCAGCAACAAGATCCTTTCAATGAGTCATCTAGGTTTTCGAGAGTGACATATTTTGAATCTTCTAATATATTAGTTAAGCTTGAGGGTAAAAATCCTGAGGAAGAAGGGTTACTTCTTTCAGCTCATTTCGACTCTGTACCCACAGGATATGGAGCTACCGATGACGGCATGGGTGTAG…	386651	-	ATGAGTCAT		AT		RY		12.8828	1.5166	YBR074W	YBR074W	G-SELEX
Peak_31	2	402131	402607	GCAGCATTTCCACATTTGTTCCTCTATTTAAGGAGTTAGTTTCATGATGAAGCTTCAAAGTCTTTATCAGATTAGATAGGTAATCCCCGGCGATTTCAGTAAGCATGTTTATTGCTGATGGATGGGCAGTTTCAAACCCATTGGCCATAGCAACCTTAGATATGTTCTTATGCATGAATTTCCATATCAGCTCCCTGTTGTTTTTGTAATCATGCGTTGGAAGCTGTGACACCGGATCAATATCGAGTGAGTCATCAATAATAGTGTAATTATAAATGTGGTTGTTAAGGAAAGCGTTGGGATTGCTTCTGGAGTTTTGAGCCGATAAAGGGCTCTGTAACATTCTGATCAGGGATATTTTATGGCATATGTGCCTAATTTGCTGAATCAGTGTGATAT…	402381	-	GTGAGTCAT		AC		RY		16.1328	1.10512	YBR080C	SEC18	G-SELEX
Peak_32	2	419776	420142	TTTTGCGCTCTATTTTACCCCTAGAAACTGGACCCGGCCTAGAATCTTTCACTGCCACCAGAGAGTTTTAGCCTCGCTCTCTTTTAATTTGCTGAAAAAGGGTTTCCTGATAGAAGCCGCGGTTAATAGAAAAACGGCAAAAAAGTTATGGTCGGTATGTTCTACCCCCCTGGATATAATCGTGTGACTAACATACGTAATGAATCCTAGCTGTGACTCCTCTCGAACGAAGAAGAAAGAGGCAATGCATGCGTAGAAACTAAATCTTGAGATTTCTGTTTGATGAAAACACTGCACAAGGTAAAATGAATTATTCTTTTAAAATTAGAGATACATAAAACATACACTTGATAGAAAGAAGAATACA	-	-							-	1.88899	YBR085C-A	YBR085C-A	G-SELEX
Peak_33	2	449316	449661	ATAACTAGGTACAGTACATAAACAGATGAATTTTATCATTCTTATTGTTATTTCTTTGTTTACAAAAGGTGAAAAGTGAAAAATTTCGCAATGGAAAACGTCGCGGGCCGCCTTTGAGTGACGTTGTGCAGGAATCTCGAAGAGTCATCACTTTGAAGATAACGGCCGCTCGCGATGAGAGAAGACAATGAGCATTGCTTTTTTATAATTTTTTATACCTTGTGTTAAAATAAGTTTCTTTAATTAGTTTTCACCTCTTGGATGATACAACTGTAATTGATAAATAGGGGTAGCCATAAAGAACAGAAAAAAGCGGCGCAATAATTTCGTGTATTACAATTACAGT	-	-							-	2.23613	YBR104W	YMC2	G-SELEX
Peak_34	2	466325	466734	CGAGAGGACACGGCATGACATGGCCCACGTTATAAGGCAATTTCCATTTTAGCATTGGCAAACGCACAAGCACAAAAAAGATGTGGAACAACCACTAAGAACGGAGTGTGCACGAAAAAAATAAGCTTTTCTCGTGCCCTGAGTGGTGCACAAAAGAAGAAAAGGGAAAAAAAAAGCGAACGAGGAGTGACGTGGACGCGATGAAGGTGACTCAGCCAATCCGGGTGAGCCGCACCCTTCGTCCTCAGTGACCTCTCACGTGCCCTGTATCAGCCAGCCACTGACAGTTTTGTTTTTGCCGCCCAGCTCAAAACTCAGATCGGATGTGCTTTAGTTTTTATCTTCGTTATGTGGATGTTTCATTAGCTTAAAGCATAGGATACCGAGAAACCGTAACGG…	466535	-	GTGACTCAG		GG		RR-YY		11.7212	0.91213	YBR112C	CYC8	G-SELEX
Peak_35	2	473867	474307	TGGTAACACTGAAAGAGTTGGATTATCCAACTTCTCTATCCAGACCTTTTCGTTAGTCATTAGTGAGTAACTCTGTGATATCTCTCTATAATTAGCAGTTTTTCACTGAAATTCCAGGAAAGGTAATAAACTCAGATTTTTTTTTATACTATTGGCTGCTTGTTACTTATATATCTTGAACTTCTCCCAGCGGGTCTTCAAATACATTTGGGCGATGTTCATGTTCATTAGGCAGGTATTTCGACATTGAGTCACACGCGAAAAACCGCCGGAATTTTTTATGTAATTGCAAGTGGAATTCCGCTGGCAAAACTATTGAAGAGTTTTCCTCGCTAAAACTGTGCGATGCCTCTAGAAGCGGTCAGCAAGAAGAAAATCGAATAATCAGTTTCAATGAAT…	474117	-	TTGAGTCAC		GA		RR-YY		14.936	5.02439	YBR115C	LYS2
Peak_36	2	533354	533717	ATAATGGTGCGCCATTCAAGTCCCGCGAAAAATGACTGATGTCTACAGGACAGGGGCGCAATATATGTTCTCTGACATTGCACCTTTTGAATATATCATGTGTTTGTTCTGCTATCTGCTTGTAGAAGGGTACGCTAACAGAGCCGGCGGCATTGTAAAAAGTTCTCCTTTCGCGGAAGGATGAGTCAAAAAGCATGTGACAATGAAATAATCAAATTGTGACATCTGCTGACGCGGGATCGTTCCTTCGTATTGTCTAGATTGTAATCTATATAACATACTACGAATATAAAAGAGGGACTACAAGATATTTCTAGCGCAAACTACTGCTTTACTGTCTCACAATGTCTCTGATTGGAAGATA	533538	-	ATGAGTCAA		TT		RR-YY		6.50005	12.3963	YBR145W	ADH5	G-SELEX
Peak_37	2	536226	536603	CGTTATTCCTGTAAATAAAGTTATATGTATTCGAATATTGCTCAGTTAGTATTTTCTTCTACTTACTGCACATAATACTTCATCTTTTTTTTCCTCTCACCCGCAAAGCAAAGGGGCCTTGCAGCAATGACTCAAATTCCATTGGAAAAAAGAAGGAGATGATAAGATGCAAATCAGAATAGATTTTACTATGACCGTTACATGTAAAAAGAGTCATAATATAAACCATAAATACTACAAATAACACCGGGTTCAGGCATATAAATAAACTATTCTCCTGTAATATCCCACAATATTTTGTTATAACCCAGACGTAATAGCCTCAAGCGAGCATCCCTAAATTTCTGCCATGAAGCTGATCCCAATTATTTTGAATGC	536356	-	ATGACTCAA		AA		RR-YY		5.49102	19.2831	YBR147W	YBR147W	G-SELEX
Peak_38	2	548042	548332	ATTGTCAACAGTCTTATAATAACTATTGGATCAACATTTCTGGGTAGCTCAGGCACCGAAGTTAGCCCACCCCAAACAGTAAATTTAAAGGATATGTCATGGTGGAAGGGCATTACCGATGTGGTGCTTTGTGCGAGACTGGCCGATGACTAATAGTGTTAGAACTCCACCTTCTGTGTAATTTCTTTCTGAAATTAGTGAAAAAAACGCGCCTTTCAAATTTTCATACTAGTGATTGGTTTATTGCAGATTATTTATTTCTAATTGTACATATTCTTGTTATTTTATATT	-	-							-	1.31441	YBR153W	RIB7	G-SELEX
Peak_39	2	549913	550353	CTTTTTTCATGACCAAGTTGGATGAAACAGACGGTGCAGGTGGTGAAAACGTGGAGTTAGAAGCTTTAAAGGCATTAGCTTATGAAGGCGAACCACACGAAATCGCTGAAAATTTCAAGAAGCAAGGTAACGAACTATACAAAGCAAAAAGATTCAAGGATGCAAGGGAACTTTACTCAAAGGGCTTGGCTGTAGAATGCGAAGATAAATCAATAAATGAGTCACTATATGCCAATAGAGCGGCATGTGAGTTAGAGCTGAAAAATTACAGGAGGTGTATCGAGGACTGCAGTAAAGCTCTAACTATTAACCCCAAGAATGTTAAGTGCTACTATCGTACAAGCAAGGCTTTTTTCCAATTAAACAAGTTGGAGGAGGCCAAATCAGCCGCAACATTTG…	550133	-	ATGAGTCAC		GT		RY		8.99917	0.739917	YBR155W	CNS1	G-SELEX
Peak_40	2	554748	554985	ATCATAAGGACCCCCATATCGTGATAATCATTGATGACCAAATCGTGAACTCCCTGCGCCTATGCCGTGCCATAGCAAATAAAGTACTGGGCTGGATTGTTAATGACTTGCATATTAACGACAGGTAAACGGTACCCTATTTTTCTTTTTTACGTGCTACGGACGAAAAGTGAGGGTGATTAACGCTTCAAATAAGAAACGACGGCTAGCAGGGTCTAGATGCGTGAGATGAGATAAG	-	-							-	1.11434	YBR157C	ICS2
Peak_41	2	555794	556063	TTCTTAGTGGTAGTCTGCTCTCGCGCTCTTTGTTACACTCGCAAAATTTTTTTGCTGGGCAAAATAAAGCACTCTCCGGCCATTACTGGCTGTCGTCCGCCAGGATTTTCATTAACTTGCAGAAGTAAACAAACAAAACACAATTATGACACCGTGGAAGTTTCCTAAATGGTAACAAAAAGCTTAATTGAAAGAAAGAATTTCCTTCAACTTCGGTTTCCTGGTTCCGCTATTTCTCGCTTGTTTCTTCTATTGGACTTAGGATGTCTC	-	-							-	1.15344	YBR158W	AMN1
Peak_42	2	569690	570070	TTTATTTTTACATAGAATAGTAGAACTTTCTTCCTTTTTTCACGATTTTTTGCATGGGCATTTGTCACAATATATATTTTTATTCAGTTATATAAATATACTCCTTTTCACAAAAGAAGGCCTAATATTATAGGAAATCAGCATTAAAAACATTATGTATTTCTTTTTTCAGCGGCCGAACGGTCACTAGAATGACTCAGAATGGTTTTTATCATCTCGTTGCCAATGAGATTAGCCTCTGGAAGCATTGGCTCAAAGAACTTTTGAACACTCTGAAATTGCTTTTTGTATATATCAAAATTGGCAAAAGAAACAACCGAGCTCCATTCTCTAGCCGAAATAACAAATTCTAAATCATCTTTTATGAATGATTTATCATGG	569885	-	ATGACTCAG		AG		RR-YY		4.78704	2.06606	YBR165W	UBS1	G-SELEX
Peak_43	2	576553	576825	CCACATTGAATAAATACTTTTTTAATTCTTGATAATCTTGAGATTGCCCCATAGCTTGTCGATTGCTCCATGGAAATCCGGTGGAACTAACGAATTTCGAGTTGGTTTCCGTATCGGTATTCGGGAACCCATGAGTCAGCGTCACTAAAAGATAGTCTACCGGAAATGCAGGCTTCGCATTTTCCTTCACTGTTATACCATATTCATTCGACTTCATGTAAAATATCTCAGGTACATATCTTTCATCTGTAGTGTCATTAATATATGCCATTG	576687	-	ATGAGTCAG		CT		RR-YY		2.68685	1.91737	YBR169C	SSE2	G-SELEX
Peak_44	2	591882	592140	GAGTAACCAATCTTTGGATCTTTGGAGCCTTGGTGTAAGTCTTTTCACCCTTGGTGACTTCTCTTCTGATGACGAAATCACGAACGTCATCTTCCTTGGACAAACCGAAGAACTTTCTGATGTTGTTAGCTCTCTTTGGACCCAATCTCTTTGGAACAGTAGTGTCAGTTAGACCTTCCAATTCTTGTTCACCCTTCTTGACAATGACCAAAGCCAAGACAGCCAAATCTGGACCAACAATGGCACCTCTGACGGACTT	-	-							-	0.809502	YBR181C	RPS6B
Peak_45	2	625308	625633	TAAAAGAGTAAGTAAATTCTAAAGTGGTGTGAATGTCATAACTTAAACTATTACCCACGGGATACCTGCTAGGTCAACGTAGCCGCTACTCGAATATAATAAGCGCTTCTTGTATATTTTCTCAATAACAGGTCGAGGCCCCTTCTACCCTTGAATGCTACTTATTACTCACTCATAATACATTGTATAAGCCTTCGCGTTTTTCACGGCCTCGAAAAAATTTTTCTTAACTAATTTACCCAGAAAGGAAATTTCCTTATAAGGAAAATAAATGCAATTCATTAAGTCGGTTTGCTTCTTTTTTCACGAAAGTGAGATACAAGCAA	-	-							-	0.754228	YBR202W	CDC47
Peak_46	2	649611	649865	AACGCGATGTCAATTTCTATGCAACTGCCCAATGGCAACAGCAATAAAACGGCCTCAAGCATGAACACAAACCCTAACACAAACATGATCATGAATTCTAACATGAACATGAACATGAACGTAAATCCAGTACCATACGGAATGGGAAACGGTGCAAATATGTATGACGTGTCCAGGATGATGACTCCTCCCTTAAATATAGCCCCGAATTCCAATAATTCGAAATCGAGCATCATGAACAAGCATCCTAATAGG	-	-							-	1.53922	YBR213W	MET8	G-SELEX
Peak_47	2	662393	662789	GTTTATGTATGTAATCAAGTAAGGATACCGAAAGTAAGAGAAAAGAAAAAAGGACTAAAAATCACAGAAACACAATAGGAAATATCCGATGGGGAGTACTTCTTACTTAACACTCCCTGCGCCAATTCTGACTCTTATAATAAATAGCTCGAGACGTAACTGCCAAAATTGTAAAAAAAAAATGAAAAACTATTAGAAAATTAATTGCGAAAAAAAAAAGGTTAGTCATATGTGCCTTTGCGGCGTCTTCCGCAGGAAGGACCCCTCTCTGCCAATCACAGAAGAGCTGGCTGTGCCTGTGCGGTACGCTATCAGCAGCTGCGTCGGGTAAGGGACACGTCGTTAGTGACAATCGTGGTTAGTTTTCGTACAGAAAGATGACCTTAATTGATAATTA	-	-							-	3.55568	YBR218C	PYC2
Peak_48	2	677887	678451	TGGATTGGGAAAGGAGTGCTGCTTCCAAGTAAAATATTTTTTGTCGTTCGTATACTCCAAGTCCAACCAAATAAAATCGTAAGGAATCATATGAGCATCCATCTGAGAGTCCACTGTGAGAACGTCCATCTCATCATTATAATTCCATCTACATTGATGGTACCCTATAGAGGAAATGGGCGGTAAAAAGGGTCTACCAGTCAAATCGGTAAATTTGTCAATGATAGTTGGAATATCTGGCCCCAGGGACATGACTACATCTATGACACCATTTTCGGAGATCCAATGAGTCATCGTTTTATTTTTACTGGTGTCATACTTTATGTCTACCCAAGTGTCAGCTGCATTGACCCAAAAGATAGATGTGGACGAAGATGAAAACATGAATGGGATCGAACC…	678176	-	ATGAGTCAT		AT		RY		21.1897	1.39853	YBR229C	ROT2	G-SELEX
Peak_49	2	697068	697389	TGCCACCAAAGTGAGGAACAAAATGGTTGGCTGGGCTTACCTGATAAGTAGCGAGGGCTGGATTGTTAAAAGTAGCAGGCGTGTAAGGAATGGCATAGTTGTGTTCATGGTGCTCCATAGCGATTGTACCGTTAAATTTCATTGGATGAGTCAGCGAATTCTTTGTCGGATGTGGAACAAACTGGTTTGGGGGTTTGCCCTTCAGTACTTGTGTTTGCTGAGCTAAACGGATCATAGGATCAGATTTGCAAGATAGAAAAGCAATTAGAGTAAGAAATATCAAGCTAATCACACGTTTTTAAAACCTCGATCCAACTATAGA	697217	-	ATGAGTCAG		CT		RR-YY		4.30599	0.624005	YBR238C	YBR238C	G-SELEX
Peak_50	2	716460	716861	CGGCATTCTCTTTTTCTTTACTTGTAAATAATTAAAAAACCTAAACTGGATACTGCTACTTCAATAGCTGCCTCTTTTCTTTTAAAACCTGATTGAGTAGTCGTCGATATCAAAGGAATATCAACTTATGTATGTTTCGATGTCTGACTCTTTTCTCATGAATTTTTCATTTTTTCATGATCACCTAATTAGCCGTGGAGAGAGAGAAAAATAATCCCAAAGCTACGATATGACTCAATTTTTTTTTGCAGAAGAGTAACTGATAGTATAACATCCACGAAATCAGTGAAAGGTCAGCGAGCTTTGCCTTTAAAAATTGAGTTTCTAGTTAATTAGTAAATAGCGCTAAACACAATTAAATAATACCGAATTGGCAGTGGTAGAGGAAAGAATGTACGT…	716693	-	ATGACTCAA		AA		RR-YY		5.2329	3.41256	YBR248C	HIS7	G-SELEX
Peak_51	2	718148	718489	ATGAAAAGAAGAAGAAAGTATGAGAAAAAGTTTCTGTATTAATATGAAATTAAACATTGATTGGATTCGATCACGATGTATTCAATGAGCTAACAATGCGTCCCGCACATCTTTTTTTCAAAATTTCAAGCAAAATTTTTTCATTTCATCGTTGAGTCATTTCGCAGTAACGTACAAAATGCACAGGGTGCAGCGGGTGGGGCCACGTTTTAAAGTGATTCTGCCATGCCTTTGCCTTTATATTAAGCAACATAACTGCCTGACAGTAATGCAACTACACAGTGTTCCGTGAGACCGTTACAGCTTATGTTTACACAGCCTCATGCCCAATGAAAGAGTGTC	718303	-	TTGAGTCAT		AA		RR-YY		4.65798	3.1693	YBR249C	ARO4	G-SELEX
Peak_52	2	724235	724667	TTACCAATAATGGCAAAATACTGAGGCATCTCAATGTGCTTTGTATGTTTTTTCTGTATTCTCTATTCGTATTAGTGTTTACCTTCTCTTTTTTTTCTTGATACAGATTGATATTATTTGAAAAAATCTGATGAGTAAGGCTTTGAAGAGGTAAAGGGGATATCAAGATAAAAAATATACACTTCAGCAGAGGAGGGGGAGGTACTTTAAACGGATGAAACATGACTCATACAAATGAGCACGACCATAAGGCTGAACAACAACAAAATGGAAGGGGCGATACAACAACAGAGACTGTAAACCCTCAGAAGATGAAATTGGTTACCAAACTTCTCATTGATAATAAATTTGGACTAATGGACGACTTGAATTTTAGTATACCATTAACCGCTTCTTCTG…	724460	-	ATGACTCAT		AT		RY		15.1472	2.04268	YBR255W	YBR255W	G-SELEX
Peak_53	2	727966	728349	TCTCCAACGTGACAATCGGTGAGAATACTCCCCGCATTGCCAATAGTAATAGAAACTCCTTGACCTCCACTTTCAGAGTCATCATATGGGTTGTTTTCCAAAACAGTCCCCATGCATTCTACAATACCAGTAAACATTGTGCTATGGTTACGATCTCACCAATTGGTTTGACATGTACGTTAGGAAGTACCGTCTTTTTATATCATTTGGATGGATCTGGAATATGACTAATAGATAGTTCAATAACCTTCCTCCATGGAAATTACCGAAAAAAAAGAAAAGGACGGAATTGGTACCCGGAGAGTACTTGGGCGGCTACTTTAGTTTTATATAAACCAATATCGAAGACAGTGATCTTTTTACAGCGAGCTTGAACACAAAATA	-	-							-	6.48765	YBR256C	RIB5	G-SELEX
Peak_54	2	806634	806915	GGATTTTTTTAAAGGAATCGCCCTACTTTCTAGAGATCATTCGAGAACTCCCATGCCATGGACGAAAGATAAGCCCAATGCTGGATTTACTGGCCCAGATGTTAAACCTTGGTTTTTCTTGAATGAATCTTTTGAGCAAGGAATCAATGTTGAGCAGGAATCCAGAGATGATGACTCAGTTCTCAATTTTTGGAAAAGGGCCTTGCAAGCCAGAAAGAAATATAAGGAACTTATGATTTATGGTTACGATTTCCAATTCATTGATTTAGACAGTGACCAGAT	806808	-	ATGACTCAG		AG		RR-YY		3.62548	0.566006	YBR298C-A	YBR298C-A	G-SELEX
Peak_55	3	5100	5350	CTTTCGCTTTTTTTCCAAATCATTATCGAAGATTCTTTGCTTATGATATACTGGTGCTCGAGGATGATGAGAGGACACAACTTTTTGAGGCTTATCGTTATCGTCTGAGTCACAACAACATACATTAACTGTCCACGATTCAGGGATGTGCTATGAGTTCAATTTTCGCTGTAGTGCTGCCATTGGCGCTGCTACTGGTGTCTGGAAAAACTCCACAGCTTTCAATGGAGATGTGACTGCACGAGTGAGAC	5208	-	CTGAGTCAC		GG		RR-YY		3.22656	1.17795	YCL073C	YCL073C	G-SELEX
Peak_56	3	44980	45455	ACCTCTTGCATTCAATAAAAGCTTTGGTATGTAGGTGATTTGTCCATTTTCTAATTCCATAACGATTGCCTTTGTGGTAATATCATCCGTTGTCTTGGAAATGGACATTGTTTTGATAATCTCGGGAAAAATGAATTGTTTAGTTTGAAATTGAGGTTTGTTAATGTGTCCAGTCAATGGATCATAAGAAAAATTGTCGCTTGAGTTAGACAAACGCTCATCTGGGGTTAGTGACTCATATAATTCCACCACTACTAACTTTTGTTCTGGAACAGGTTCAGAACTGAAATAGGAATAAACGACCCAATATTCACCGAAAACAATATCCATTGGAAACCTAAAATCCGGAGAATCCTTGTGCTCTTGGGTAATGAGGATTTCTCCTGTAATGGTATCAAT…	45214	-	GTGACTCAT		GT		RY		11.8268	1.04713	YCL047C	YCL047C	G-SELEX
Peak_57	3	67561	67815	TCCTGTAGCCTTTGTTTTAGTAAAGATTCTAGCCCCACCAAACCATGCTTGAATTCACCAAAGCAAGACATGGTCTCCAAGTGGCAAAATCCAACGTTTTCTTGTTCAACGATAAACTTTAAGGCATCCGAATCACAGTCAGTAGAGATTTGTAAAAGCTTTTGGCCATTGCCAGAAGTTTCACCCTTGATCCAGATTTCATTCCTAGAACGAGAATAATAAACGCCACGACCCAAATCGATGGCCTTTGCTATA	-	-							-	13.8759	YCL030C	HIS4
Peak_58	3	68018	68766	TCTCTTCCACAACAACACGCTCCTTTGGTACATTCAATTGTTCAACCAAGTGTTCGGCTGTTTTAGCATCTTGGCTAGCAATGAACAGAGAAGAAACTCCGTTGTTCAAGAAGGCAATGATTTCATCATCGCTGAATTTACCACTTGGCAAGGACAAAGCCACCAATGGAACTTCTTCCTCTTTGGAGAACTGGAGAATCTCTTCATTACTCAGGCTCGAGCCATCCAAAAGTACCTGACCAACAAGTGAAACGTATTCCTTCTTACTATTCCATGAGGCCAGATCATCAATTAACGGTAGAATCGGCAAAACCATTATTCAGAAAAAAAATTTTGTAAACTATTGTATTACTATTACACAGCGCAGTTGTGCTATGATATTTTTATGTATGTACAACA…	68529	-	GTGAGTCAC		GC		RY		34.9407	13.8759	YCL030C	HIS4	G-SELEX
Peak_59	3	105411	105937	CAAGGGAGGTCTTGTTGCGTGTCTGTGCATCTGCTTGTACGCCAACGCGGAGGTCGACGAGGAACTGCAACGCACCATGGTAGCACATGAAGAAGCAACCACCCTGCGGTGGCCGCTTTGCAATAACGATCTCAGCATTAGAAAGACTGGGTTAGTGAGCTCAGATGTTCTAAAGATTCTGTATATACGAACTATGTACTTCCATATATACCATTCCCCGTTCTTGTTAGGTAAAGGTTAAAAAAATATTTTTTATGGCACTTCGGCGATGCGAAAGAAAGTGAGTCACGATAACGGTGAGGTGATTCGTTGGATGTGCCATCGCACAAGGAATTGCTGGCGTGCTAATTCACGACCTTGCTTGACAAAAGTATCGAGGGGAATGGTGCCACGGTGCAG…	105695	-	GTGAGTCAC		GC		RY		14.2086	3.51203	YCL009C	ILV6	G-SELEX
Peak_60	3	182670	182909	ATGAACTTAATATATTCCAATACTCTAAAGCAGATAATCTGGGAGAAAGAAGAATACGAGATGTTTTCTGAGTCACTGATGGCGCATCAGGAAGTTTTATTTGCACATGGAGCATGTGATAATGAGACCGTTGGCTTATTGTTAATATTTTTTGCCAACAGATTACGTGATTGTGGATACAACAAAGCAGTCTTCAATTGTATGAAAGTGATCATTAAGAACAAGGAAAGGAAACTAAAG	182741	-	CTGAGTCAC		GG		RR-YY		2.62818	1.09579	YCR032W	BPH1	G-SELEX
Peak_61	3	216113	216656	CACATTCTCCACCAGCCTCAACCCCAGCCAAATTTACAAAAAGAGGAAGAAACAGATGCTGAAGACACAGCAAAACTACGTGAAATCACAAAGCTTGCCTTGCAGTTGAACTCTAGTGCTCAAAAATACCAGTTTTTCCACGAACTGTCTTTGCATCCAAGAGAAACGCTGACTCACTACTTATGGTCTTCCAAGCAAAACGAGCTTGTGCTGCAGGGCGACCAATACTTCAATGAAGATGCTGCAAGAACGAGTGACATATACAGTAACAACAACAATGACAGGTCACTAATGGGCAATATCTCACTACTGTACTCCCAAGGAAGACTATAACATCACTGTATGATCTCATTCTTTCTGCAATTATTGCACGCCTCCTCGTGAGTAGTGACCGTGCGA…	216285	-	CTGACTCAC		CC		RR-YY		4.52892	1.62095	YCR053W	THR4	G-SELEX
Peak_62	3	232179	232481	CTACAGAGTCAAATCCACATAACAAAAGTTCATCCAGATTCAAGGTACGAACTCCAGAAGTCGACAAAAGCTCATGTGGTGAGACCTCACATGTGGATAAGTATTTAAACTCAATGATGAGTGCAGAACACCAAAGATTGCCGAAGATCAATTTTACGTCTATGACTCAATCCCAAATAAAACAAAAACTGTCATCGTTGGGACTGTCAACTAATGGTACTAGGCAAAACATGATTAAAAGATACAATCACTACGAAATGCTTTGGAATTCTAATTTTTGTGATTCTCTAGAACCTGTTGATG	232344	-	ATGACTCAA		AA		RR-YY		3.17963	1.22296	YCR066W	RAD18	G-SELEX
Peak_63	4	49974	50275	GATCAAAATATAACGGATCATAAATGCAAACAACATTTGTCCAAAAGAAACAAAAATGTTGGCGTTTGTCTCGAACATGACACAATACTCCTTGATCGAGGGACATTGCCCGATTAACTATGATTTATACTTTTTACTACAGGTACTCGTTCTCCCTACTATTTCACCAGTATACGGTCGTTTTATGATTCATTTATTGCCTATAATGGTAAAAAGGGACATCTTAACCTTACGTGTTGCAATGAGACCATTCTTTTCGATTCATCAACTGTGAAATTTCTGAAATCCAGTACAATGCGAAA	-	-							-	0.174987	YDL227C	HO
Peak_64	4	52919	53215	CAATTTGACATTGTTTTAGCTGAGGAAACCAGAATTAAAAGGAATCCGAGGTTTGAGGACACCAGGGTTCACGTAGCATTATATTTTATTGAACCCACTGGACACGGTCTGAGAGAAGTCGATGTAGAGCTCATGAAAAGCATCTCCAAATACACAAATGTACTGCCAATAATAACAAGAGCTGACTCATTCACCAAGGAGGAGCTAACTCAATTCAGGAAAAATATTATGTTTGATGTGGAAAGATACAACGTCCCAATTTACAAATTTGAGGTTGACCCTGAAGATGATGATTTG	53104	-	CTGACTCAT		CT		RR-YY		2.75724	0.932787	YDL225W	SHS1	G-SELEX
Peak_65	4	57725	58108	GCACCACCAAGGTCGGTTCTACGTTTGTTCTTCAAATCTACTTCACGCTTGTAGCCCGGTGCGTCTTCCTCTAAAACTTTCGCATTCTTATTGACATCAATATTATCGTCGCTAGAATATTCTTGATTTTGGGAATTGCCGCCAGAACCGTAACTGGCCTTTTGTTCTGATGATGGTTCCTGATCGTGAGTCATTCCAGTAATATCTTGTGATTTGGCATATGTAGGGTCCGCATTTTTAATATTATCGTAAGCAGCTGTTTCAGCATCCCCTGATTTGGAGTATGTAGTGTCTCCAGATCTGGAATTATCAAAGGCAGCAACATTAGCGTTTTCGAGATGAGTGTCTGTATTTTTACTATCATCAAAAGGGTTCGAGCTGAAG	57914	-	GTGAGTCAT		AC		RY		6.94591	0.896152	YDL224C	WHI4	G-SELEX
Peak_66	4	69384	69737	CCTTGTTGAACGGTTTTGATAGTCAATGTTTTTTTTATTTTCGTTGCTAACACGTTCACTGGTAGTAGCCAACTTAATCCTTGTTCTAACATTTTTGGAATCCATCAAATAGCTATACTGCTTCATTGAATCGATCAATCTATTTAATGATATTTGTTCTGACTCATCATCCTCTATTACGCAATGTAAGTTTAACTTTGTTTCAAATAGCGCTCGGTTCAATTCTGAATCAAATATGATTGTTTCTAGTTCATAGTATGAAGTGGCACTATTATCATCACTTTTACTTTCTATTGTCCTAAATGCACCCATTCTTAAAATTTTATCTTCCAGACTTTTCAAGGGATCGACCAC	69546	-	CTGACTCAT		CT		RR-YY		4.38812	1.35521	YDL216C	RRI1	G-SELEX
Peak_67	4	74638	74923	AACTTCCAGTATACGCCTCATTATTTTGTGAGTTTCTTCTGGTAGTCTGTGCAGAATGAAATTGGGACCCATATCAATGACTCCTTCTTCGTAGCCATCATTATCATAATTATTGCTGTCATCGGTAGCAGGCCGTGTCACAAGATCTTTAAAAGATGACACACCTCTTCCGGAACAAAATGCCTTGAATTGAACATCTTTCACTTTGGGATATTTCCAAGGAAATCTTCTCGTTATCATACAAAAGAATATTATCCCCACGGACCAAACGTCAAGTGCTCTTGGA	-	-							-	1.18399	YDL215C	GDH2	G-SELEX
Peak_68	4	104358	104890	CCCAAAGGTTCGCTGAAATGATCACGAAAAATAACACGATTCAATTCCTGGCCAGAGGTTATTTTGGTGTGGTTGGACATCAGTCTTTTGGAAATGGTGTCCACAGGATGGAAGACGGCAATTTCCATTATGCCTGCAGAGGCGGACCCCAAAAGACGAGCTAATCCTGATTGTTTCTTATCGGTATGAGGCATATTTCCCTTTTCTAATACTTTGGAAGATGCTTTGTTTGATATATGTCTAAAGGCTAAATATTAACCATCAAAAGAGATACACGATTTATATAGTCACCTCTATATATCTATGTCGTCGCTTTGTAGAAAATGTGACAGCAAATGCACAGTGACTCACGAGTTTTTGTTTTCTCGAGCTTTATCAAGAATTGCGATCGTTCTTTAA…	104704	-	GTGACTCAC		GC		RY		14.7835	4.94073	YDL198C	GGC1	G-SELEX
Peak_69	4	110070	110322	GGTATCCCTGCAAATGCTGCTAGTACCATGCCTCCGCCACCTCTTTCCAGAGCTCCCTCTTCTGTGTCAATGGTATCACCACCTCCTCTACACAAAAATTCTAGAGTCCCATCCTTGGTTGCAACTTCTGAGTCACCAAGGGCATCCATATCAAATCCATACGCTCCTCCTCAATCATCACAACAATTCCCAATAGGTACTATTTCTACAGCAAACCAAACGTCAAACACCGCTCAGGTAGCTTCATCGAACC	110201	-	CTGAGTCAC		GG		RR-YY		2.93324	1.17563	YDL194W	SNF3	G-SELEX
Peak_70	4	121214	121446	ATGAGTTAACGTTAGAAACAATTCCAGTGATATAATTGATGAAAGCACCATTCATGCAAAAGTTTTCTATTTGTAAGGCAACGACACCATAGCCAATGACAAGACGATCAATCTCTTGGAAAGTGGAATGTAATGACTCAGCATTTGGCTTGTTTTTGGTGATTCTTTTTTGTTGCTGATTACGGCGAAAGCAATCGTTCAAATATTCAAACGGTTTATCCAACTTCTCATTC	121350	-	ATGACTCAG		AG		RR-YY		2.53432	1.23602	YDL190C	UFD2	G-SELEX
Peak_71	4	132589	133306	GCTATTATCTCGATTCGACGAACAAACAGTTCCCTGGGTATTCGAACAAAGCACAGTTGGTGATTTTGTTTGAAACTACAGACGTGCTCTCTTTTACAAAATAAATTGTAGGAAGTGATCCGCACAGGCAGAGGGAATTACAGATCACGCTCCTCTCTTATGACTAATGCACTCAGCATTTTCTCTTCCTTATAAACTCCGTCCACAGTACCCGATCAGCTGGCTCATCGTTATTCTAAATTAACTGATGACTGATGTTACGTCTGCGTCAAATTCCGCCGGAATATTGCGTAGTTTTAGTAAGAAAAAAACAAATTCCGACGGGAACTCTCTGCAAGGAAGTTTAAGCGTGGGTTACTTTGCTAGGTTGAGAAAAAGAATTCTTTAGAGGATCACACG…	-	-							-	4.19395	YDL182W	LYS20	G-SELEX
Peak_72	4	136358	136764	ATAATAGGGAATTTGTTTAACTACCAAGAAATCGCCGATCCAAACATTAATAGTGGCTTCACACACCAGGAAAGCGCCAACACTTACTGTAACAATAATGATATGAGCCATAACGATGACTGCGGTTGTAGTACAGAATATCGCCCCAACGTCGTAGACAGAAGTGATATTACGTTGTCCAAATGTATTGAAGTAAGAAATGACTCATCTTCCATATCGAATAACGTATACTCGTCTGAGTACCATCCAATCAAACCTCTACGTTCATCGTCATCAACTTATGGCAGCATACGACAGCAACCTCATGAAAATAAGAAGCAGCTGCATGTACCAGATAATTCGCAGGACGATACAATTATCATGATGAACCCCATCGACAATTCATTAAAGTTGACAACT…	136561	-	ATGACTCAT		AT		RY		15.7808	1.58953	YDL180W	YDL180W	G-SELEX
Peak_73	4	155977	156419	GGAAGACCATCAGAACTTATGAATGACTAAGAAAAGCAGTTTATATTTTTTTTTTGGGCAATTTATTGCTTCTTTTTTTTACGTTTTGCGGGCATCACGTTCGTCGTGACATATGACTTGAAAAATGTGCAAAAGCTTATCGGAGCCAATCGGATTGACGCATTAAAACCGAAGTGTATTAGGACCAAATTTGCGCTGTATAGGGTTGAACGGTAGGGCTACCAGGGTCTGAGTCATCAAAGAAAAAGAAATTACAATAAGAGTCTTACTTAAGATGATATAGAATTGTTGTTATTGTTCATGTATGGATGCCAAGAAAACAAAGTTTTTTAAAGTGAGGTATGAATTATGGCGTGGAGAAGCTGAAATTGAAATATTCGAAGCATGGGTGTATTACTT…	156209	-	CTGAGTCAT		AG		RR-YY		16.52	5.83574	YDL170W	UGA3	G-SELEX
Peak_74	4	162302	162743	CTTGATCTTCCACATAGGGACTGTTATTTAGACTCCAGTTATTATTAACGTTAGACGTATCTTCTACGATGTTTTTGACAGTCCAAAACCCAACTGGTCTAACACCATATTGGGTAAACCATGATTCCAACTCACTTTGAGTTGTGTCGGGCGGTAAATTGTTCATGTACAAAATCTTAGATTTCTCTTGCAAAAACGCTCTAATATCGGTGTGTGAGTCATATGGTTTTGTTAAGACAGATTCCATATCTTCAGGGGAAGTACACTTTTTGTGCAATTGTATTAATATATCCGTTGTCCTTTTTAAAAGAGAGTATATCTCTGGAACAGAGCCTGCCTCTTCAGTTGGGATTGAAACTTCCAATATTCTAACTATTTCGTCCAAATCCTTCGTATTTT…	162519	-	GTGAGTCAT		AC		RY		12.4839	0.872193	YDL167C	NRP1	G-SELEX
Peak_75	4	191841	192089	TGAGTTGATGAGATGGCCAATTGTTCAAAAAACCTATGAGCCCGTCTTAAATGAGGATGATTTGGCATTTGGTGGAGAAGCTAATAAGCATCACTGGGAAGATTTACAAAAAAGGGTCATCGAGCACAATTTAAGAGTCATTTCCGAATACTATTCCAGAATTACTTTACTAAGATTGAATGAATTGCTGGACCTAACGGAGAGCCAGACGGAAACATACATCAGTGATTTGGTAAACCAGGGCATCAT	-	-							-	1.53553	YDL146W	LDB17	G-SELEX
Peak_76	4	226972	227300	TTTACCGGGCGGCTTTTCGGCCTGCTTGAGAAGAGATCAGGCTGAAATGATGAGACTGACAACAAGGATCAGTCAGTGGCAGAGTTGAAATTCCGCTGGAAATCGTCACCAGCAGCTACCAGCTCCAAGAAATCCGCGTAGAAATCACGTCGCGCAATGTGCGATAGTGGTGGAACAGCGAAAATTAGTCACTTTGCAAAGATGCCAAGCTGATCGTTCTCGTTGTGTGTGATTCTACGATATTGCGCATGAGTGGTGTTGAGCATGCGTTTGTTCGCATTTTCATGCAGTCTCTTATATACTAATATATATATGCAACAGATTTCAAA	-	-							-	3.15434	YDL131W	LYS21
Peak_77	4	252729	253068	AGTTACACATTTAGCCATTTGCCTTGATATAATTAATCCAGGTTCTGTTGAAGAGGTTGATAAGTCCAAGCTCATTACTACGTATATCAGTCTTCTGAAATTGCAAGGCCTTTATGAAAATATTCCAATATATGCTACTTTCCTGAATGAGTCAGACTGCTTAGAGGCATGCTCTTTCATATTGTCTTCTTTAGAGGACCCCCAAGTAAGGAAAAAGCAAATTGAGACAATAAACTTTCTAAGATTACCTGCCTCAAATATTTTGAGAAGAACCACACAGCGTGTTTTCGATGAAACCGAACAAGAATATTCACCATCTAACGAAATTTCCATATCTTTC	252879	-	ATGAGTCAG		CT		RR-YY		3.50815	0.802178	YDL116W	NUP84	G-SELEX
Peak_78	4	274054	274498	CTGTTTTACCTAGTTTTGTCAAATTAGTTCTTAATGCTGTGATAAATGCTGAAAACGAAAACGAAAGCATGTTTCTTTTACTAGCGCTGTTTTTTAACGGACTGGGCATTTCTAGTTTTAAAGCAAAATCTTGGTCGTTAATATCTTGATTAATAAATTTCTCCATTTCTCTAGCGATCATTGTTCCCTTGAATCCAAGCTCTCTGCCACATTTATCTAATGAGTCACCCACTGCAATATCGATAGTATCACATAATATTTCGTGATCGTCAATTGCTCGTGACAAAACAAACGTAGTATGACCACCACTAACCAGCAGGCTAACAAAGGGAAATTGAGGCACTTTTCCATTTGTACCCATTCTTGGTATCAGCAAGTGTCCCAGCATGTGATGCACAC…	274277	-	ATGAGTCAC		GT		RY		15.9685	1.04614	YDL104C	QRI7	G-SELEX
Peak_79	4	280346	280638	ATTGTCAGTAATTTGTAAACGCTGCAATTCTAATGAGACCGAGCTTTGTTGCTGTATGTCATTGAACCAAGGGTGGTTCAAAGCTTCATCTATATTGTACCTTTCATCAGGATTTAGGACCAAAAGATTGGATATTAAATGTAGTACTGAGTCATCGATTTTATCCCAGTACGGAGAGTAAAACGCATACTTAGCTTGTAAGATCTGTTCCTTCAATGAAGGTGGCCCCAATTGATCACTGAATGGAGGAAAACCACATAAACAGACATATAATATGACACCAGCACTCCAAA	280496	-	CTGAGTCAT		AG		RR-YY		3.67241	0.605915	YDL101C	DUN1	G-SELEX
Peak_80	4	320837	321226	TACTTTTGTAGAGTAGGCAAAAACAACAACTCCACCTCTAGATCAAAAGGTGTGCCTTCCAGTAGGGGAAGGTTACCTGTAACATTATCTTGATTAGTTACATTTACAGGGGTTCTTCTCAATTTGTGAAATGAGCCACCAGAAGGCGCTCCAATTTTGAACCCGCAATGTCTTAAAACTAGTATTGGGTCTGAGTCATCAGAATAGATATCACATCCCCATATCTCATTATTTCTCTTTCTAGGAGATTCTATATTATTGAAACTTGCCTGAATATCTTCATATGTTATTTTTAGCGTTGCAATATTATTGATATTTTGAATACCGATAGCTGGAAGGAACGGTGGTGGAAGAGTGTTGTCATAAAGGTTGTATGGAAAACTGTGCCTG	321031	-	CTGAGTCAT		AG		RR-YY		5.87821	1.34591	YDL076C	RXT3	G-SELEX
Peak_81	4	334246	334476	GCTCTGCGTAGAACTTCTCTCTCTTGTTAATCTTATCCATGTGGAATCCCCACCACCAGTAAGAGGCCATGACACCCCCGAGGGAGAACCCGAGGACGATGTCCATGATGACTCTTCTCTTGATCGTACCAGTAATTGGAGCAATAGTCATGTCTGTGTAAGTCGCTTGTAGTTAGTAGTTTGCAAATATCTTGCTTGCTCTAATTCTCGGTCCTAATTTTCCCTGAAGAT	-	-							-	1.77687	YDL067C	COX9	G-SELEX
Peak_82	4	334536	334903	GGGCCAATCAGGTTGCAGTAAATGAAGAGATATAGAGGAGGACTCTGCTAAAGACCATAACAAGGGTCTGCAATGATCTTGGACTAAATAAAGGTGTCTTACAATCCAAAAGAGCTTGAATCATTCCTTTTATGAGCTAAATAGCACCGTTTGCACCTTCTGATAACGCTTTACGGGTCACGCGCGGATTTTGACTCACATAATTCCACTTGCCCATATAAAGAGGGACTCATATGATCTTATGAAATCTTCCTTCAAGCAATTGTGAGACAACAGACGCACAAGGAAGATCGCCCAGCATGAGTATGTTATCTAGAAGATTATTTTCCACCTCTCGCCTTGCTGCTTTCAGTAAGATTAAGGTCAAA	334730	-	TTGACTCAC		TC		RR-YY		4.24733	3.26612	YDL066W	IDP1	G-SELEX
Peak_83	4	360598	361231	CGCTGGTGGCTATCCATGCAAGTAGCCCAATAACGACATAAACGAGGGCAAATGTTTGGAATACTCTTCCCAGGTTTAAGTCACTATTGGACGAGGAAGAACTTGCGTTAGAGGACCAGAACCATTTGATTCTTAGCAGTTGAGAACCGACTACAGAAGAAATACCATAACATGTCGTTGGTAAGCTAATGGATAGTAGTTTTGTATGAGGATATAGCTTAGTGCATGTCAGTAAAGCGCTAAAGTATAAAGCGCTTGTTGATATACCTATGAAAACGAAACAAATGATGGATAGATTGAATGATGAGTCACCATTTCCTCCGAGAGATAACTCCGGATGATTAAAAACGTAAGCCAGATATGAATAGCTAGGTATGAACCCTATGATGGCTAAAAGAC…	360905	-	ATGAGTCAC		GT		RY		39.8334	7.40661	YDL054C	MCH1	G-SELEX
Peak_84	4	384640	384917	ACTGGTTACATCGCTTGAACTACTAGAGTCACTTGAAGTGAAACTGCTGAAAGGACTAGTTGAAGCTGCTAATGTGGTGACATCAGTAGATGTTCTTGAACGATAAATATCGGCTACGCTTGATGAAGTATGTGAGTCAACGGAAGTAGTAAAATCAATGGATGTAGTGGAAGAGCTTTTCACAGTAGATGACGTAGTAGTGGAAGTTTTCGTAGAGGATGAAGTAGTAGAGGATGAAGTAGTAGAGGATGAAGTAGTAGAGGATGAAGTAGTAGAGG	384775	-	GTGAGTCAA		TC		RR-YY		4.38812	1.54637	YDL039C	PRM7	G-SELEX
Peak_85	4	391936	392288	GGCAACCCCAGCAGCTGGTTAACCGTGGTAGTGTTAAGCTGTCGGAGAGAATCAACTCTCTTTTCTAGTAAGGATGACCCTTTCAACGCGTTTAAATTCGGGGGAAATCCCTCAGTTATCATTTTGAGTTGGAGAGTTTGCTTTATTCGTCACACTTCGGATCACTTGTTTGTCGTTTTTTTTTTTTGGTGACTCTTACTGCTTTTTATAGACACACACACACACACACACACACACCTTCTTCTGGATACCGTAGAGAAAGGGATGTAGACAAATAAAAAAGGACAAAAGCTAGAAAAAAGACGGAAGAGGACGTGCGATTGCGTTGAATATGACCTTCGCAAATAAATATT	-	-							-	1.39513	YDL035C	GPR1	G-SELEX
Peak_86	4	407265	407830	TCCTCTCAGCTTATTAGCGCACTAAAGAGTCAGTTTGGGTGAATAGCGTAATCAACTTATGGAAAAGAAGAACACTAGAATCCGTCACTATTGGCTGCAAATAAGTATTATATCTTTTTTCAATGAGAAATCTTGCTTGCCCCATAACAGGTACAATACTTAGCAAGCCAGGAAGAGTCACACTGCAAAATAGATATATGAGAAGCGGAAGTAGCTTTTCCCCTTATAGATGTACGCCGTTCGATATTACCCGAACTGCAAGAAAAGCTTCTCCAAATATCTACTGGCCTCCATTCAAGAAGGCAATTAAAGAGACTATGTGTACATGAATGGGAACTTGGTATGATGGTAGTAATGCTTTATTAGTCATTCCCCTACCCCCTTGCGCAACCTATCATT…	-	-							-	3.69236	YDL025C	RTK1	G-SELEX
Peak_87	4	410897	411211	TTTTTCACCTATAGAGCCGGGCAGAGCTGCCCGGCTTAACTAAGGGCCGGAAAAAAAACGGAAAAAAGAAAGCCAAGCGTGTAGACGTAGTATAACAGTATATCTGACACGCACGTGATGACCACGTAATCGCATCGCCCCTCACCTCTCACCTCTCACCGCTGACTCAGCTTCACTAAAAAGGAAAATATATACTCTTTCCCAGGCAAGGTGACAGCGGTCCCCGTCTCCTCCACAAAGGCCTCTCCTGGGGTTTGAGCAAGTCTAAGTTTACGTAGCATAAAAATTCTCGGATTGCGTCAAATAATAAAAAAA	411062	-	CTGACTCAG		CG		YR		3.67241	1.79823	YDL022W	GPD1	G-SELEX
Peak_88	4	465128	465606	TGCGAGTCAGAGTGGCTCCGCACACAGAGGTTATGTGACCATGGTAACCGTACACATTTTTCCACGGCAAGGAAGTGGCGCGAAAGAAGCACCGCCCTCCACGGATCACCCCATTTGGAAAAGAACGGAGACATAAAAAAAAATTACCTTCACGCCAGACTATGTATGACTCGTAGAAATCTAGCATCCGCGGAGCTATTTTAAGTTTCCGCGGATGCCTTTCGATCCTTTCCCAGTCGTCTGGTTCCGCGCACATATGACTAAATGTCCGCCCATTTCCGTTTAAATCCGTTTTCTATTTTCTTTAGGTCTTTCCATTGTATTCCCTGCAACCCCGCTGGGTATTGGTATTACTAATAGTGACTACGCAACATCAACATATAAAACAAATGATGAGTA…	-	-							-	2.50858	YDR011W	SNQ2	G-SELEX
Peak_89	4	512206	512521	GCAATTCCTGTAGCTACGTGATGACCTCTGCTGGGCTTTTCTTATTCGCCTAGACTGAAGTGATGCAGAACAATAAGCATTCTAATCGGCCTATGGTTATGATTTTGAAATTCCTGAGGAAATTTTTCCACTGTCATTTCTTCCAATTGAGTCACGTCGCGTCCTCGTAGGCAATGATGTGCAACTTGAAGCGCGGAATTCACGGCTAAGAAGGTGTCGTTTTATTCATACCGTGCTGTAACGCTGTTTGGTCATCGTTTCCTTGTGTTATCAAATAAGTGAGGCCCTGTCTCTGTGATCTATACCAGCAGTCGCC	512356	-	TTGAGTCAC		GA		RR-YY		6.58218	1.66796	YDR034C	LYS14	G-SELEX
Peak_90	4	521500	521813	AAGAACATCATATTTAGCCGCTGAAAAAAAAGAAGCAGCTGCGTATCTTCTCAAATTTATGCGTACATAGTGACATATATTTAAAAGCTTCCTCACTTTCCTTTTTTATATTTTTTCATTGCTCAAGTATTAGTCACATCGGAAAGTATGCTTGCTGCATTAAATACATGCATGTGTTTATAAGTGTTTGCATTTTCTCTCTCTTCTTTTTTTTCTTCCTGTTACTTGTATACGAACGACATATTTATTTTCACTATTTCTCATTTATATTTATAGCTACTACCCCTATTACGTTACAAGAACACTTTATAGCA	-	-							-	6.94879	YDR035W	ARO3	G-SELEX
Peak_91	4	566760	567173	ACCGATTTTTTTAGGTTCTGGAATATACTTTCTAAGGCCCTTTAACACCGACGAAAGAGACAAATTAATGGTTACTGACAATGCCATGTCAAATTGGGATGAGATTACGGAAACATATTACCAGAAATTTGGAAATGCCATAAACAAAATGCTTAGTTTGAGATTAGTATCGTTACCTAATGGACATATTCTCCAGCCTGGTGACTCATGTGTTTGGTTGGCGGAAGTGGTTGATATGAAAGATCGGTTTCAAACCACTTTATCGTTGAACATACTTAATTCACAGAGAGCAGAGATATTTTTCAACAAGACGTTTACATTTAATGAAGATAATGGAAACTTCCTATCATACAAAATTGGGGATCATGGCGAGTCAACTGAACTTGGTCAAATAACCCA…	566964	-	GTGACTCAT		GT		RY		8.83491	0.946834	YDR057W	YOS9	G-SELEX
Peak_92	4	577641	578030	ACCACTGTGAGTTATAGTGAGTCAATGCCGGCTCCTGTTTTAGCTCAAACTATTTCCTCATTACAAACCATTAGTGGTGAAATATGTCCCGGACAAGGTACTGAAAGATTGCAACGTATAGCCTTTAATTCCCGTTATCTACGTTTAGCTTTGCAAAGGTTAGGATTTATTGTCTACGGTGTGGCTGACTCACCAGTTATTCCCTTACTACTGTATTGTCCCTCAAAGATGCCCGCATTTTCGAGAATGATGTTACAAAGACGGATTGCTGTTGTTGTTGTTGCTTATCCTGCTACTCCGCTGATCGAATCAAGAGTAAGATTCTGTATGTCTGCATCTTTAACAAAGGAAGATATCGATTATTTACTGCGTCATGTTAGTGAAGTTGGT	577661	577829	GTGAGTCAA	CTGACTCAC	TC	CC	RR-YY	RR-YY	3.25003	1.53328	YDR063W	YDR063W	G-SELEX
Peak_93	4	578869	579198	CTCACCTAGATTTGTACTAACTGCATATCCAACAACAACAAAAGATGGGTTCAAACAGACTCCCTTAGTTCTAGTATATTGGAAGCCAATGACGGTCGTTTCACAGGAATGGAAGATGCTTTATGCCGGCGCATTAGAAATGATCAGAGAGGAGTGCGGTACTTTTAAATTGATAGAGGTTTCTTCAGGTTTGGAGGATGACTCAGACGTTGAAGAATTGAGGGAGCAATTAGAAAATTGTTAGTATAGTCTATCTTAAACACTAAACTACCTCCTATAATCATGTAGTGTACTTTAAACATTTTTTTATCTTCATAGCAATAATATAAG	579070	-	ATGACTCAG		AG		RR-YY		5.84301	0.882647	YDR064W	RPS13	G-SELEX
Peak_94	4	599999	600291	TATAGAAAATTAACGTAAGGCAGTATCTTTTCACAATGTACTTGCAACGCGGCGACTTAAAGTTGAAGTACAACCTGCAGCAGCGGCTTTTTGTACGGTACGCCAAACTGTCAATGGATAATATTGCGTAGACCGAAAAAGGTAATCCTCAACACTACCCGTGGTGGATGACCTAAAGCAGTAATATTGGTTGGAATTATCTCCCAGACGGCACCGTCTCCCCGAGAAAGCTTAGCCCCGAGGTCTACCTTCCATACACCACTGATTGCTCCACGTCATGCGGCCTTCTTTCG	-	-							-	1.32192	YDR077W	SED1
Peak_95	4	604847	605329	TGTTCCTACAAGATCACAGCTTTTGAATATTCCATTCCCCTCCAGAATTTTTAACGTACAGGATGTAAGGCCAGATCTATTTAGACCCCATGTTCATTTTTTAGAAAGTGATCGTGTCGTTATCGGATGGGGATCTAATATTTGGCTATTTAAAGTTTCCTTTACCAAGGATTCAAATTCGATCAAATCCGGTGACTCTAATTCTCAAAGTAATAATATGAGTCATTTTAACCCTACGACAAACATCGGATCTCTCTTGTCTAGTGCTGCATCGAGTTTTAGAGGGACACCTGATAAGAAAGTTGAATTAGAATGCCATTTTACTGTGTCAATGTTGATTACAGGGCTTGCATCGTTTAAGGATGATCAGTTATTATGCCTAGGTTTTGATATAGATAT…	605068	-	ATGAGTCAT		AT		RY		21.6356	1.90862	YDR080W	VPS41	G-SELEX
Peak_96	4	643298	643517	GCCGTCATTTTTATCTGGTAAATATTCATCCTCATCGCTTTCACTATCAACTACCTTACCCTTCTTCCGTTTAGCAGTGAATGTAGTATCTGAGTCATCATCATCACTTTCGGCATAATTCACTCTCCTTTTGTGATTCCTTCGAGATTGGGAAGATGATAAATCCTCGTCCGTAGTGGTACTTTTAGGTTCTGTCGTGTTACTATTTAACATAGTATCA	643391	-	CTGAGTCAT		AG		RR-YY		3.90707	0.468569	YDR097C	MSH6	G-SELEX
Peak_97	4	666088	666373	GCTGTTTGATTCATGTTACATTGTTGATGACAAAACATAACATACATAACAACAGTCATGATAATCGATGCGGTATACATTGAAGTTGTCCCTAAAACCAAAAATCGTTGCCAGAATGAGGAATCTTCATCTTCTGACTCAACGTGACTAATACACGTTTCAGCCCACTCATGAGCGAAGTCTACTAATAATATAAGCCCAACCAGGATGAAAATTGCTCCACTAGGGACTGACACCCACTTGGAAAAGAAAATATAAAAGTCATTGGGGATGACAAATGACAAAA	666225	-	CTGACTCAA		CA		YR		2.37006	1.23795	YDR105C	TMS1	G-SELEX
Peak_98	4	667976	668402	ATTTTTAACAATAGAGGAGAAAAAATAAAAATGGTCTCTAGCGGGATCGAACCGCTGATCCCCGCGTTATTAGCACGGTGCCTTAACCAACTGGGCCAAGAGACCAATTTGGATCGAAAGTGTTGTATCTCAAAATGAGATATGTCAGTATGACAATACGTCATCCTAAACGTTCATAAAACACATATGAAACAACCTTATAACAAAACGAACAACATGAGATAAAACACGGCCTTCCCTAGCTGAACTACCCAAACGTATAAATGCTTGAACAATTAGTTTAGATCCGAGATTCCGCGCTTCCACCACTTAGTATGATTCATATTTTATATAATATATAAGATAAGTAACATTCCGTGAATTAATCTGATAAACTGTTTTGACAACTGGTTACTTCCC…	-	-							-	1.14778	YDR106W	ARP10	G-SELEX
Peak_99	4	703866	704556	TGTTCTGACTCTTACCATATTATGTGGATGCTTCACTATCATCTGCGCTATTTTCACGTATCTTCAATTGGCCATTGTAAAGGAGGGAATGACTACAAATGAGCAAGATAAATGGTATACCATTCAAGAGTATATGAGAGAAGGAAAACTGGTGAGATCATTGGATGATGATTGCCCATCTTGGTTTTTCAAATGCACAGAACAAAAAGATGACGCTGCTGAACCACTCCAAGATCAACATGTTACGTTTTATAGCACGAATGCCTACGACCATAAGCACTACAACCTTACACACTACATCACGATTAAAGACGCGTCCGAAATTCCCAATATATATGACAAAGGTACCTTCCTGGCCAATCTCACAGATTTAATATAGTAAATTGTCATGCATATGAC…	704264	-	ATGACTCAT		AT		RY		44.8903	2.83981	YDR127W	ARO1	G-SELEX
Peak_100	4	742183	742632	GGTAGTAACATCACCATTTTGATTTCTATAACTGGCAACACCGGAGGAAAACAAGTTATTTCTGTTGTTCTCACCAGTACTTCCACCTCGTTGTTGATCATTGCTATGGTTATTGTCGTTATTGTTGTCTCTTGAGCCATTCGTAAAATGGCCTGTTAATCGTGAAATATTTTCCAAAAAGGAACTTCCTTGCGTTGTATCAGAGGACGATGAGTCATTACGTCCTTGGTTGTGAACAGTTTGTGCTCCGGGTGCTGTTGTTGCAGAGGTATCAGAAGTTCCCCTCTGAGCAACGTTGAATATGTGATCCAAAACGGCTCTTAGTCTGTTGTGGTGAGGGTCTGTAGCGTCACTACTAGTGTTATTTGAGTTTGGACCGTTCGCTGCTGATGGGCTTGC…	742396	-	ATGAGTCAT		AT		RY		13.1878	1.12377	YDR142C	PEX7	G-SELEX
Peak_101	4	770009	770354	TACAATATATGCATATCAGTTAGAATTCTGACATCTGAACGTCTTCAGTGCTTTTTTTTCTCTTTCTTTCCAGATCCAAATATCACCGGCAGCGGCCTCAAAGTACCCGGTTTTCTTTTTTTTCACACTTTTTTTTTTTCCAAATCATGTTGTCAAGCATTGATTGACTCATTTTCCTCTGACTACTACCAGTTCAAAATGTTAGAGAAAAATAGAAAAGCAGAAAAAATAAATAAAAGAACCATATTTATTTGTTCATTCACTTTCGAGTATAAAATTAAATCTTGTTTTTCTTGTTTTCACTTAAGTACACATACAAATTAAATTGTAGAAATAAAGCGTTCTA	770176	-	TTGACTCAT		TT		RR-YY		5.58488	3.75332	YDR158W	HOM2
Peak_102	4	795540	795930	CATAGCGAGTATTGATGCTTGGCATAAACAACAAGCCTGTAAGCCTTGCCTTCTCATTCGCCTTCATTACAAGTAAAAACGCCCTCATCTGCTATTTGTTTCCAATAAATCCGTGAAAACATCGGTATGTTCTAGTGTTTTGATGGAAGCGGTGCTACCTTATTGTTTGCAATATGGATGACTCAGCTTAATGGTTTTGTGATGAACACAGTAAAAAAACGTTGACTCCTACGTGCAGCCGATCGTCCTCCACACTTAAATTCGTTGAGATAAATCGTGTAGTAATACACTCAGTCATTCAGTATCCGTGCTTGTTTCTTTCTTTTCCTATTTGTTCGCAAGTGACTACGTGCGCCCTTAATTGCTTACATATTTTAGGTTAAGATTACAT	795721	-	ATGACTCAG		AG		RR-YY		6.30059	-	YDR169C-A		G-SELEX
Peak_103	4	797572	797895	CTTCAGCTGTCATGATCGTATCATTGAAGCAGAATAACATAGGGAACCACACATCCTGGAATATGTCTTTCCCACGAAGTAAAGCATCGTTATGTTTTCTTTCTTCTTCAGTCTTATTTTCATTGTAAAAACAGATGTCTGCGACGTTCTGAGTCATCTTTCTTAGAGACTCCAAAGCATGTAGAGATAGCTTTTGGAATCTCTTATTTTTGGTGATTTCTCTGAAGACACCAACTAACTCAGAAAAGGCATCTTCTTGAGAGAATACGTTTTCGAAGTGATTTGTCACAATATCATTGCTAACCAGCAATTGCGTCTTTAATA	797724	-	CTGAGTCAT		AG		RR-YY		3.93054	-	YDR169C-A		G-SELEX
Peak_104	4	803491	803955	TGGTTGGCCAGTATACGGGCACCCATCTTTGATGCCGTATCCACCTTATCAAATGTCACCTATGTACGCTCCACCTGGAGCACAATCACAGTTTACACAATATCCACAATATGTTGGAACACATTTGAACACCCCGTCACCTGAGTCAGGTAATTCATTTCCTGATTCATCCTCAGCAAAGTCTAATATGACATCCACTAATCAACATGTCAGACCACCGCCAATCTTAACCTCACCTAATGACTTTCTAAATTGGGTTAAAATATACATCAAATTTTTACAAAATTCGAATCTCGGTGATATTATTCCGACAGCAACAAGAAAAGCCGTACGTCAGATGACTGATGACGAACTCACCTTCTTATGTCACACCTTTCAACTATTTGCTCTATCTCAATT…	803635	-	CTGAGTCAG		CG		YR		2.47565	0.787226	YDR170C	SEC7	G-SELEX
Peak_105	4	819723	820407	AGACCTACAGGTAAATACCTTTATTGCCTTAATTTTCCAAAATTTCGTTAAGTCTTGGTATGGTATCAAAATACCCACTGATGATTCCAAGTTTTTAACCGAACTATATAACTTAGTTCAAGATTTAATAACATATTTGAAGAGTTCCAAAATCAATTACCATGCCCTTTTACTCGATTATATTCCCTGCTTGCTTTCGTCTCACTTGAAAGCATTAAATGACTCATCTCAAAATAACGATTTAGTTTATGAACAGTACTGTAAGCTAACTTTGTATGATTCGAAACGATATCCAATGCTATTCACTGAAATCATACAAAGTAAAATGAGCACCAAATCTCTACTACAGAGAAGCTTTTTGGATAGCTTTTTAAATGAACTTGTGTTCGGGCATATTTT…	819945	820220	ATGACTCAT	GTGACTCAT	AT	GT	RY	RY	9.94954	1.14431	YDR179W-A	YDR179W-A	G-SELEX
Peak_106	4	835040	835553	GGTCTCCACGTAACGTAAAGACCCCGAAGACGACACCAGTACATTCAGATCAAACTTGTTTTCCGGTGTGCTGCGAGAGCTGATCAGACTTTTCAACTCCTCCCAAAACTTATCGTTATCTTCCGCAGTAGATGTGTTGGAAAAACTTTGCGCGATCGAATTTCTAAGCCGATGCAGCTTAAACCGTTTATTCAGTCTGGAAAGCTTGTTATGAGTCATCTCATCGTTGTAGTAGTCGATCGTAGGGATATCTATGTAAAGTAGGATGTTAAGCTTCTTTAGCGAAGGGTACCGGTCCGCCAAAGACGCTTGTACCACTGTCTGCTGCATGTTGGAGTAAGTGATCAGAAACAGCGAGTCCTGTGACTTCACACTAACTTTTGGTGAAGTGGACTGGGC…	835254	-	ATGAGTCAT		AT		RY		18.9956	1.29049	YDR186C	YDR186C	G-SELEX
Peak_107	4	901222	901626	CGAACCTGTCTCCCCTGTTTGTATGGTAATGCTGCAAGACGGTTCCCTTTTGATAGAAGCAGCATCCAAATCTGAATTTCTTTTGAGGTGTTTTGTCGGTGATGTCTTAGTGCTTCTGTTCTCCTCCTCTTCACCGATCTCTATTGTATCTTTTTGACGTCGCTTTATTGTTCTTCGGTTCTGAATAATCTCCTGTGACTCACTTGGAAATAATTGCATGAGGTTTTTCTGAAGTTCTGAGCTCTGTCCTTTGCTTTCGTGTTCAATCAAAGCTACATCCAAAGACTCTGTGCCATCTTGTTTATCTGAATTGCATTCTTTATTATCATCATGAAGCTGAAGTGAGTTCCCCTTGCTTTTTTTTATCTCCATTAAAGTTTCTTCCTCGACTACCAGCTT…	901420	-	GTGACTCAC		GC		RY		7.07497	0.746365	YDR217C	RAD9	G-SELEX
Peak_108	4	914004	914225	AGTATTGTTCACACGAGCCAATGCTCTGAAGTTTCGAAAGCTAATAAATATCATGTGGAAACTTTTCTGAGTCATTAATAAGCAACACTATTTATTCTTCTTATAATTAGTCTTACAAGTAAACTGCCTTGCCGCATAAGCGCATTCCCTCTATGAGACCATTTGTAATTTCGAGAACACAATTTTACAACCGAGTAAATATCTTATAATCATTAAAATTAT	914074	-	CTGAGTCAT		AG		RR-YY		3.05057	1.13564	YDR224C	HTB1	G-SELEX
Peak_109	4	934818	935383	ATTTTATTGAATAACTTAGTACAGTTTTATTCGAAGGATACCGTAGAATTTGTAGAAAAGAACATATTTCAAAAGATAATAGAATTTGGTTGGGAGTACTACCTACAGAACGGTATGTTCTGGAACTGTTATTGCCGTTTAATTTATTTCGACACTTCTAGGTCATATTTGGACAAGAGGCAATATATTGTCAGAAAAATATGGCCCCAAATAGACAAAAAATTTGCACAGAGCGTCTTGCCGTCTTTAACAGAATTCTGTGAGTCATACTTCCCAGAGGAGATGGATACATTAGAGGAAATGTTTACTGAAGAACCTTAGCCAAAAGGCATTGTCATTTATTAAAAGGTATAAATATGTAAATGTATACTTAATGACCGTTAAGAAAAACTACTAGCC…	935081	-	GTGAGTCAT		AC		RY		24.6275	4.87632	YDR236C	FMN1	G-SELEX
Peak_110	4	946012	946671	TCTTAGGGAAGTAACCAGTTGTCAAAACAGTTTATCAGATTAATTCACGGAATGTTACTTATCTTATATATTATATAAAATATGAATCATACTAAGTGGTGGAAGCGCGGAATCTCGGATCTAAACTAATTGTTCAGGCATTTATACTTTTGGGTAGTTCAGCTAGGGAAGGACGGGTTTTGTCTCATGTTGTTCGTTTTGTTATAAGGTTGTTTCATATGTGTTTTATGAACGTTTAGGATGACGTATTGTCATACTGACGTATCTCATTTTGAGATACAACACCTCGCAAGAAATCGACTCTCGGTAGCCAAGTTGGTTTAAGGCGCAAGACTGTAATTTATCACTACGAAATCTTGAGATCGGGCGTTCGACTCGCCCCCGGGAGATTTTTTTATG…	-	-							-	2.64557	YDR242W	AMD2	G-SELEX
Peak_111	4	950473	950898	AGAAAGGTTTCTGATTAATATTGATTCACCAAACAGTTTTAGTTCCTATTTTTGGATATATATACATCAATAAACAATATATCATAACACATGGACGTAGGAAGTTGCTCAGTGGGAAATAATCCGCTTGCGCAGTTGCACAAACATACTCAGCAGAACAAATCGCTTCAGTTTAATCAGAAGAATAATGGGCGTCTTAATGAGTCACCTCTACAGGGTACCAACAAGCCAGGTATTAGTGAGGCTTTTATATCCAATGTTAATGCTATTTCACAAGAAAACATGGCGAATATGCAAAGGTTCATAAACGGAGAACCACTGATCGATGATAAAAGAAGAATGGAAATAGGGCCATCCTCAGGCAGGCTTCCACCTTTTTCAAACGTACATTCTCTACAG…	950676	-	ATGAGTCAC		GT		RY		16.2032	1.44767	YDR244W	PEX5	G-SELEX
Peak_112	4	955189	955415	AAACACCATACAATCCATCACATCATATCCTGCCAATGCACTATTACGCAGCTTTCGGCACGTGAGTACGGAAACACCAGTTCGGAACCGGGTACACAATAGGGATAGTCAAAGCTGTCCATTTTTTCCGCTGATGGATGACTGATACCAAAGTGTAACCCAAAAGGGGTAGTCGATCCTACTTTTACCAGTTACGTTAAAGGGACCAAAACGTGGGGAAGGGATGC	-	-							-	0.74564	YDR246W-A	YDR246W-A	G-SELEX
Peak_113	4	961453	961778	ACATTGGAAGAATAAGTGCGAAGACTTACCTGATGGGCCGGCACTTTTATATAATTTCATCCATAAGGCTTCATCTTTGAATATTGACTTATTGTTATTACAGCCGATATTATTAGCAGATGACTTTGGCGTGAAGACACCATATTTAGAATGTTTGTTTACAATGATGACTCAATATCAATTGTTAAATAAAGGTGATTCTGAATGGTTTATTAGAAAGGATGAGAACACAGCGTTAACTCGCGTTGATGATTTACAAAACAGTATCGCACTTAAAGATGGAAAAATCATGCAGCTGCAAAATTCGGAATCAACCCTGAAAAATG	961623	-	ATGACTCAA		AA		RR-YY		3.96574	1.24667	YDR251W	PAM1	G-SELEX
Peak_114	4	966630	966914	GTAATTGTTCCGTTCTTCGATAATCTGTCTAGCGCCTTTTTAGAAATGATGTGATGGCATGCCAGTGAATAAGGAGGATTTTCTGTAGTGGTTTCCTCCTTTAAGACGGGACAGATGAAGATCGGATGGAAATGAGTCAGAAAATCTGGTAACTTGACATCAAATGGCAACTCATCTTTCGTAGTCCAGTCAACGTGCGCTAACTCCCTGATGGTTTTGTATTTGATGAAAAATTGGAAAGAAATTAAACCACTCAATACTATCAAAAACAAGGGAGAGTCAAAG	966765	-	ATGAGTCAG		CT		RR-YY		3.57855	1.41848	YDR255C	RMD5	G-SELEX
Peak_115	4	974184	974555	TAATAGTTGCGTTCTCTGTAAATATTTTTGTATTGGTGCTTTTGTAGCTTGTCTTAACATATTTAACCTTGAAAGATTTTCACTCGCTTGTTTCAGGGTTCCTGGAATAGATAATAGAAGTCAAACTTTTCATGCTTACATATGCATATATATGTATATATATGTGTGTGCGTGAGTCAGTAACTAGGGGGTTTGATGAGCTTAGATACAATGAATCACAGGGGTTTATTCAAAAAAAAAAGTCCGTGCACCCCCTATTCAAACGCGATGCCATTAGATGAAAGAACACTTCTAGAACATTCTGGAAAATAACAAATTTTATCAGAACAGAATCACACCTTGATTTGTCTGTTACATTAATTATTAAAATTT	974359	-	GTGAGTCAG		CC		RR-YY		7.2627	3.79789	YDR258C	HSP78	G-SELEX
Peak_116	4	976571	976831	TTTGGGTGTTATTTTGTTCCGTGGATTTTACGCCACTGTTTTGCTTTAAAAAAATTTCTCACACAATAGTCTAGTCTCAACGGCTGTGCATAGTACCCATACACCACAATTTCTGACTAATGATCAGCATATACGTCACGTTCTGCTCATCGTGACTGTGGGAGAGCCAGTTCGTGCCAACCGTTATTTCTTGCGTACGCCAATTGTGTGATGCGCCTATCAAAAATAGAACCAGTTATCGTTTCTTTTCTTGGCTCATTG	-	-							-	0.921756	YDR260C	SWM1	G-SELEX
Peak_117	4	999523	999798	TGTCCTAACCTCTACGCTCGGGTCCTGGATTTATGGGAGAAAAAGGACCAATGATTCAATTACTAGGTCGTCTGTTGGTCTACAGGAGCGTTCAGAACATGAATCTATAGAAGGCATACCGAAGGAATCGCAGCTGACTCATATAAATTTGTCAGATAAAAACCAATTGCCATTTATTCCAGAAGCCTCGAGAAAATGCATCCTATGTCTCATGAACATGAGTGATCCTAGCTGCGCGCCATGTGGACATCTATTTTGTTGGAGTTGTCTTATGAG	999660	-	CTGACTCAT		CT		RR-YY		3.26176	0.741808	YDR265W	PEX10	G-SELEX
Peak_118	4	1029855	1030193	TGTTATAGAAGATTCAACCGGCTCTTTGTCAACAGATCGAAGCGTAATTTCGAATATAATCTGTGGCTGCTTATCCCAGCTAGACTTTCTTTTAGTTAAGTCAGTAAAGTCATCCATATAAATGGAACGTATCGCTTCAAGTTCGTTGCACTGTATTTCATAATATTGATCTAAAGTGAGATGACTCAATGACATTTATACATAGTATGTGTTAAGGGGAACGGAAAATTATTGAAAAAAAAAATCAATGCTTATAAAATCTTAAAAGACAACGAGGCTTTCCAACAATGTAAAGATTGAAAATTTAGTGTATTTAATGTCCTTTTGTAATGAAAATAA	1030039	-	ATGACTCAA		AA		RR-YY		3.08577	1.3354	YDR283C	GCN2	G-SELEX
Peak_119	4	1111096	1111549	CCAACTCTGGTTCCACGGGCAGAAGTGAATATCAAATTTCCCTTCTCTACTGGTGTAAATAAGTGGATCGAACCTGGTGAATTTCTATCGTCCAATGTCACATCCATGCGTCCCATTTTCAAAATTCAAGAATATGAACTTGTGAACGTTGAAAAACAATTGTATACGGTACTGATAGTCAATCCTGATGTTCCAGATTTGAGTAATGACTCATTTAAAACGGCTTTGTGTTACGGATTGGTGAATATTAATTTGACTTATAATGACAATTTAATAGATCCAAGAAAGTTCCACAGTTCTAATATTATCGCTGACTACTTACCTCCGGTACCTGAAAAGAATGCTGGAAAACAGAGATTCGTTGTTTGGGTATTCAGACAACCCTTAATCGAGGATAAG…	1111305	-	ATGACTCAT		AT		RY		12.1553	1.18561	YDR322W	MRPL35	G-SELEX
Peak_120	4	1153629	1154007	TGTAGAAAAACGAGCTATTGCTTTTTCTTTGATTAACAGAATTTACAACACTCAAGAATTTATTTCGTAACCTTATAATATCCTCTCCATAGATGCATTGTGAAAATTGAAGCTAAAAATTTTTTTCGCTTCGCATCATGAAAGTAATTTTTCTTCTTTTAAGTGACGGGCGATGAGTAAGAAAGAAATAACTGACTCATTAGACACTTTTTGAAGCGGGATACAGAAAAAGAAGATATTTCCCATTTCAAAAAGGCTCTACTATATCCTTACCATTTACCAAACTAACCAAAATTTGTAGACGTGGGTCTGCAGGCAAAATTGGAATATTTGTGAATAACAGTGCGGTCGGTAAACAACTGACTTCTTCCCACTTTGC	1153824	-	CTGACTCAT		CT		RR-YY		6.39446	1.69522	YDR341C	YDR341C	G-SELEX
Peak_121	4	1154071	1154475	CTTGAAAATTAAACTGTATTATTTTGTATATATTAAAAACGTATTTACTTTTCAAGATATCATTAAAAATATAAAATTAGAATTAGAGTACATTTCAAATGCACAAATTAGAGCGTGATCATGAATTAATAAAAGTGTTCGCAAATTATTTGGTGCTGAACATTCTCTTGTACAATGGCTTGTCATCGTGAGTCATTTCTTCAGCGTCGTAGTTGGCACCTCTTCTGGATGGTGGAACCCATGAGGCAGACTTCCATGGTAGAACACCTTCTTCCCACATGGTGTTGACTTCTTCCAAAGTCAAACCCTTAGTTTCTGGAACAACTAACAAAACATAGAAGAACATGAAGACCAAACAGCCCATGAAAACGTAACCGTAGTAGAAGTTAATAGCACCAG…	1154262	-	GTGAGTCAT		AC		RY		9.52715	1.69522	YDR341C	YDR341C	G-SELEX
Peak_122	4	1184317	1184727	CGTTACTTTCTCCTTTTCTTTAATAAAAAGCAAACCATGAATTTTATTTCTTTTCCCCATTATTAGAGAAAGCCAATACATAATCTACATATATTGCGTGTCTGAATTAAACTTTTTAGACACATGACATAGGCCATCGGCTTACTTTGTAACGCGTGGTTGCCTATACACCGACTATTAAGTTATGACTAATATTATTGCTGCGCTTCCCCACCTGCATTTTTCTTGTCGTCTTTGCCAAAAGGAAAAAAAAACCTACGCAGATTGACTCTCTAAAAAATGATTCATGACCAGACAATTCAGTAAACATAAACTCTGTTGCATTCATTCTTCTGGAAAACTTTATAATAAAGCATCTGATATTACAGCTACTGACAACTAAGTGAATTTAAACTGCAA…	-	-							-	3.95981	YDR354W	TRP4	G-SELEX
Peak_123	4	1201590	1201954	ATTGATAACCAAATATTGTTTTCCAACAATGCAATCCCAACCCTATCTCAATATTCATAGAATTCACTTATTTCTCAGTTTAATACATGATGATGCATCTTGATATTGAGAAATTATATGTATTATCCCTTTTTAACCTTTAAAAGGTCACAAATAAATAGCCTTGTTGGCGCAATCGGTAGCGCGTATGACTCTTAATCATAAGGTTAGGGGTTCGAGCCCCCTACAGGGCTAATAACACATTCAAAATGTTATAAATTTTTTTTCGGGTTTGTGTTTAAAACTAACCTTCTAAAGAAAACAATAAAAATTATATCAACATTTCCTCATGTCTTTGTAACCTACTAGTAGGGATTTTGAAGGGC	-	-							-	0.655107	YDR363W-A	SEM1	G-SELEX
Peak_124	4	1220630	1220894	ATATGTTTCAGCATATTGCTTTGATGAAAAAAATTCAATATTTATCAGTTATGATAACACTAAATCAGTCAAAACTAAGGCTGAATATGTGACACATAACAATTTAGGCGGAGGCTTTTGGTGGGAGTCATGTGGTGAAGCTTATGCAAATGAGTCAAGGTCGTTGATAAACGCATTTAATGAAGGCTTGCACTTTAATGTGTCATCAAAACCATCAATATTTCAAGATGTGAGAGTTAAAAAATATTACTTGAATAAATATGGC	1220783	-	ATGAGTCAA		TT		RR-YY		3.57855	1.70897	YDR371W	CTS2	G-SELEX
Peak_125	4	1226313	1226586	GCTTTTATTATACCGGATCTAGCTACAGCTAAACCTGTACCAAGGATCATAAGACCACCGCCGGCGGCAAAATAGGGATTGTTTGACATAGCATCGCCAACTAGTTTTGAAAGTTTTTCCCGGACTGAGTCATTACCAGTTTCATTTGTTGGCGGAGTAATTACACCACTCAGATTTGGAGTAGCCTGTTTATCATATTGTATGTCAATCGGCTTATCCGACATGGTAGATTGAGGGCACACTTCATTTTTTTTCAAATCGTCCCTTGGTACGT	1226441	-	CTGAGTCAT		AG		RR-YY		2.25273	1.19893	YDR375C	BCS1	G-SELEX
Peak_126	4	1234948	1235189	TCAACAAGATTACTAGTTGGATATATTCCAGTAAAACACCTGCGATCCTTGGAGACGTACTGACTGATAGGTATGGTGTGAGTAACTTTTTGAACAAGCTTATCTGCAAAACTGGGATTTGGAATTTTTCCACTGTTATGGGAAAATCTGTAATTGATGAGTCAAACCCAACTTATATGGGTCAATATAATGGTAAAGAAGGTTTAAAACAAGTCTATGAACATTTTGAACTGTGCGACTTG	1235108	-	ATGAGTCAA		TT		RR-YY		2.65165	6.06609	YDR380W	ARO10	G-SELEX
Peak_127	4	1237480	1237738	GGGTTTATTTTTCCTACGCAATGGTATACTTTTAATACTCTCAACTCCTTGATTGTTTGTGTATTGTCCCTTCCTTCTTTGATTTTATATCATAGAGATATATGACTAACTTTTTTTTTTTTATTATAGGAATTTTTTGCATCTCAAGTAGGTGGTGTTCAAAGAGTTTTGTTGAGTTATAACGAAAGGGGCCAATCTACTGGTATGGCTAACATCACATTCAAAAACGGTGAATTGGCCAGAAGGGCTGTTGAAAGAT	-	-							-	0.914172	YDR381W	YRA1
Peak_128	4	1238058	1238410	CCGAGTTTCATTATGTATTAGTTTCCAGAAAATTTAAAGGATTAAAAAATGTATTAATAAAACTTTGATATGTTTATGTAATAATATTTACCACCGCCACTAGGTGACGCTAACCTACTCATCGGTGACGGCTTTTCTCACTTTTAAAGTTTATTCGGCATATTTGACTCATAATATGTCACTATTTACAGTGCGATGAATATATATATACATAATACTGCATTGAAAAAATGGATAGGTTGATTAAACGTGTGTTACTCGTTTCTCCTCCTATCTAAAAAACCTAATTTGTCACCTCTTTTTCTTGTTACAGCACTAAGCCCGCTACCTTCATATTTACTCTTTCTTACTAA	1238225	-	TTGACTCAT		TT		RR-YY		5.63182	1.47106	YDR381C-A	YDR381C-A	G-SELEX
Peak_129	4	1243780	1244151	CCGTTAACGTCATCGTTTCCACCTACGCCGATGAAGTTTTGGGTGATGTCCAAGTTTACCCAGCCAGAGGTACCGTTGCCTTCGGTTCCGGTTTGCACGGTTGGGCTTTCACTATCCGTCAATTCGCCACCAGATATGCTAAGAAATTCGGTGTCGACAAGGCCAAGATGATGGACAGATTATGGGGTGACTCTTTCTTCAACCCAAAGACCAAGAAGTGGACCAACAAGGACACTGATGCTGAAGGTAAGCCATTGGAAAGAGCTTTCAACATGTTCATCTTGGACCCAATCTTCAGATTATTCACTGCTATCATGAACTTCAAGAAAGATGAAATTCCAGTTTTGCTAGAAAAGTTGGAAATTGTCTTGA	-	-							-	0.701616	YDR385W	EFT2
Peak_130	4	1294994	1295227	CGAAAAATGATAAGACGGAGGATTTGCAGGTAGAATCTGATGAATCCTGGCACGGGTTTGATTCTGATAAAGATGACGGCGATAACGACAATAATGAAAGTAGCGTAAAGCCTATTTTGAAGAAAGGAGCAATCACGGAAATATACGATGACTCAACTACTGTTGAATTGGAGACATTGGAACCCAATGATAACTTTGAATATTTAGCCCAGCTAAATAATGTCAAATTAGAAA	1295145	-	ATGACTCAA		AA		RR-YY		2.74551	0.710556	YDR412W	RRP17	G-SELEX
Peak_131	4	1305156	1305586	CGGGCGCCAGGTTTTGTTGATAAGAAGAACGAAGTACCTTTAATATCTTATGATCGGAAAATACCGACTGATGACTTTTGAGACTTCGCTTTTGATCAAAGTGATAACATTATGTACAATATTCATACTAGGATTTCTTGATAGAGATTTGGAAGTCTATAAAAAAGAAACAACTTGTTATAATTTATTTTTGTAGACATGACTCACAGAATATTACATACCTTCATAATATATAAGATCCATGTGATAATGAATGCTGGAAGCATGATCTCTGACCTCAGCTGATTGTTCAGGGGACTTAATCAATTAGATGCGTTTAAAGCAGGAATTGGTTTGATACACACAATCTCATGTTACAAAGTAACGCTGTTTAAAAACAAATCTGAAGAATAATAATGC…	1305358	-	ATGACTCAC		AC		RY		7.97841	1.02474	YDR420W	HKR1	G-SELEX
Peak_132	4	1315654	1316148	AAAGTAGCAAATAAATCATCTTGATTACAGTCAACAACTCTATGTGTAAAGCTGGGAGGTTCTTGGGGATGCACGTCATCAGAATCTCCTTTTACAGAAATCGTAGAGCCGTCACCTATATTAAATAAATTTGGTATTTCGTTCGAATACACCAACCTCTCAGGCTTGACCTCGGCCATCAAATCCAAACTGCTAGCCTTCAGACGTACAAATGAGTCACGCATATTTATTGAACTGGACCTACTTAAGCCTCTATAATCTGAAAACGGTGTACTTGGCCTTTCAACACCCTTAGCAGAATAGTAGGAAGATTTTCGAGAGGAAGAAGGAAATCTTTTAAGTTCCGGTCTCTTGGGCAATTCTTCATCCAGTGTTGGCTCTACTTGCGAGTCGATGTCT…	1315869	-	ATGAGTCAC		GT		RY		12.1671	1.07635	YDR422C	SIP1	G-SELEX
Peak_133	4	1321028	1321568	GAATAATCACCCATTTATTAAAAAACATAAGATCAAATAAATCTCATTTCCACTCCTTGTCCACGTATTTTGCTGAATTAGGCGCATATTATAATGCTTTTAGTTTGGAAAATGACATAACCATGCCCAACAGCCTTCGCGAATCTGAAAACAATTCAAACAACCCAATGATGGAAATTATTAGTCATATTGAAAAGACAGGCCATTCATTCGATGTTATATACATTTCTTCCGAGATCTTAATAGAAAAGTACACCTCTATTCTTGAGGACCCCATTAATGAGTTATTGCAGTTCTTAAATGAGTCATTCAAAGTTCTAAATTTCAAGAAATTAAAGTTTTTGCAATTTAAAATATTAGAGAGGCTAATTATCGAAAAAGAAACGAAACTTTCGAGTC…	1321332	-	ATGAGTCAT		AT		RY		20.2159	0.81652	YDR427W	RPN9	G-SELEX
Peak_134	4	1352317	1352915	GGGGGAAATATCAAAGGGCGCGGAGAATGCCACATGAGTTTGATGATTTATAATGTATACGTAAAAAAAAATATCATAGATGAAATAAAAGTTTCTTAAGAATATCACAATGACCACAATAAAGTGTGGATGTTGTTTAAAAAAAAGATAGCCCTGTAGGGGGCTCGAACCCCTAACCTTATGATTAAGAGTCATACGCGCTACCGATTGCGCCAACAAGGCTATTTCGTTGGAAAAACTAATTAATTTTGGAAGTAATAGGACATTAAACATGTTTGTTGCAATGAAACTTTAAAATATCATCTGTTTAGTTTTATTCATGTTACTTGTTGGAATAAAAATCAACTATCATCTACTAACTAGTATTTACGTTACTAGTATATTATCATATACGGTGTT…	-	-							-	0.881893	YDR446W	ECM11	G-SELEX
Peak_135	4	1357764	1358152	TCGAGTTTCTCAACTGGCATATATCTGATATTTAGAGTGATGTCAATCATTACTGTTTTCAAATACAATTCTGGTAGATCCTTACGGAGCGAAAGGTCATACATGTCATTTTTCCAAAACTGCAACACGTGATTGATAAGATAGTCTCTTTCCAAGTCTAAAAATTCATCAAATAGTTTAATATACCTTAGTGACTCACTGAATAGGTAATTCAAGGTCTCCTTATTTAGTTCAATATTCATTTTGGAATCTGAGATGGCATAGTAACCCTTATGCTTATTAATATAATGCTTGCCCAAAGTCTTCATACACACATCGAAAATAGTTAATGCAATGTCACCGCGTAATGCTGGGTTGGTCTCTGCATTACCTAGTACGCTGATGTCTGC	1357958	-	GTGACTCAC		GC		RY		5.92514	0.568079	YDR449C	UTP6	G-SELEX
Peak_136	4	1399150	1399433	GAATGCTTCGATATGAATGGCAATCACAATAATAACTCTGATAACTTACAATTTGACAGTGTACCATCTTCTGCAACGAAAGATTTGAAAAACATCAAAAGTGTCACCAACCAAAATGTAAAAATAGAAGAATCGAGTAGCACAAATTCAGTCATTGAAGAGTCATCTGAACCTAAAATATCAAAATTAGAAAATGTGAACCTTGCCGCGACGGTAGGTGGTTCACAAACTAGAAAATACCTGAATACAAATGTGACACCGCATTTATTAGCGGGCATGAGGCT	-	-							-	1.08633	YDR469W	SDC1	G-SELEX
Peak_137	4	1411798	1412031	CTATGATGTCCCATATGATGTCCCACATGACGCAAGTAACTTCAAAAAAAGAGGAATTGCGTGGCGGCGTGGATGCAAAAGGATGGGCGTGATGATGGGACTCGAGACCTGGTTTTACTCAATGTTAGTCATATGTATATAGTCCTTATAGGCCCATATTAGAAAGTACATGTCATAGTTACCCTCTGCAGTTTTTCTCGTAGCGGAAGGGGATGGAAATTTTTAACGTAAAAG	-	-							-	1.05665	YDR477W	SNF1	G-SELEX
Peak_138	4	1419997	1420457	GCCATGGACAAAGACGCAGGTCCCATCCCATCCGTCACGAAGAATATGACATTCTTCTTCTTGTGTGATGCAGAACGTAATGCAAAACTGCTTGGAAATGCCAGTTGCACTAAAACCAGCAACAAACCAATACAGACCACAGTGGATACTATTATCTTTGATCTCTTCGAGATCCGTCTCTTTTTAGGACGAGAGCTCGAGTCAGATCCAGGAACAAGACGTGTCTGTTCGCTTGGTAATGTGTGAGTCATCATGCTGCTAATGCGCGTTCAAATAATGTCCCGTATGCTGATATGTAAATGTTTATGTAGCCACTTGCTGGCAAAATGTGGAGCACGAAAAAATATAAACGTTTAGATACACTTCTTTCTTTATATACTAAAATCCCTTTACTTTTCC…	1420243	-	GTGAGTCAT		AC		RY		21.2836	2.44403	YDR481C	PHO8	G-SELEX
Peak_139	4	1429013	1429274	TTTTTTTTAGCCTTCTGCTTTTTGTTGGAGATATTTACATTCACCTCACATATATACGCCAATGAAAATTTCACAATAGCACGTATATTAATAATAGCCTTGCTTTTTTTTATCAATTCTCGCTAAGAAATTACTCATCAGGCAATAACCTATGCTCACCCGCCTCGAAGCGGCGTTAGGAGATAACAGTGGCCGTGTAGAGGGACGTCTTAGCATCGAAAGCCCAATTTACAACAACGAGGCGACCATCTGCACACCACAC	-	-							-	2.29401	YDR487C	RIB3
Peak_140	4	1445127	1445580	ATCGAGATCAGCGCACTGGATATATAACCAGTGTCGTAACCAAACATGAAACCGGATATGGATGCGACAAAAGTCAGAGTGATGATGAAGGGCGAAAGAGATTGGTTAAAAGTGATCATGACCGACGTGTCATCCTCGTCGTTCACGGGTTTAATTTGAATCCTATCTTCATCATCGCTAGCGGGAGCCCTCTGTATTTCATGTGACTCAAGTGTAATTTTACCTCTCTTTGAAGGTGAGTCATGCTCACTGTTGAACTCTACACTATCAGCGTTGCCAACGGCATCACCAACATTTGATTGCGATGTCTTTGACGTGAGATATGGTATGTGTATTCCCATTTTAACACCCACTGCAGAAACAAAGAAAATGAAAGAGATGTATACAGTAGGACGACCA…	1445366	1445333	GTGAGTCAT	GTGACTCAA	AC	GA	RY	RR-YY	10.7943	0.180958	YDR497C	ITR1	G-SELEX
Peak_141	4	1450652	1450901	CTTATCATCAATGGCTCTGGCAACATTCATCATTCTATATTTTTAAATCTTTTGGCATAGTGAATAACGTAGGTCTTAGTTTACCTGGCCTCTCCTGGTGGAAAATTTTTTCAGTGCTTCTTTCTCATGTAATCCTCTAAATCAGACCGGATGTGATTGAACGTTGACTCATCAATTAATAATTCCTGTACATACTACCCATCTTTACTTATATATTCGTTTACCTCTTTGTTCTTTATCTACACATAGT	1450819	-	TTGACTCAT		TT		RR-YY		2.9567	0.87339	YDR500C	RPL37B	G-SELEX
Peak_142	4	1457176	1457595	GCAATATGCAAGGCTTTTAATTCATCTTCAAATTTATTGTGCAAATTCGTTGTTACCTCCCACGGGGTGGCAAAACGTAAGACTTGTTTAGATGGTATGATTAACTCAGTTAATTCAACAACATCATACAATTTGGGATTTAATTTTTTCTTTTGCCCATTTTTTGAGTCAATCAACATTTGAATAAACTCATCATTGCGATAGTGCTGTGACTCACTTGTAATTAAAGAGTCAAAGTGAATTTTCTTTTTCAGAAAATTTATAAATAATGCTAAATTCAAATCGACAGAGGGCTCAACAACCAATACTAAATCCCTTCCACGGTCACCATCAATAATAACCAAGTCACCTCTCTTTAACAACAAATTGGTAGCTTGTGGAGTAGATAGTAGTTCAAGT…	1457343	1457388	TTGAGTCAA	GTGACTCAC	TA	GC	YR	RY	7.00457	0.770988	YDR504C	SPG3	G-SELEX
Peak_143	4	1468816	1469195	TCATGCGGCGTTATTCTTTTTTCCTATTTTTGATGGTCCCTGTGCCGTTTCTTTTTCATGTTCACCGGTTTTTGGCGCCGCATACCGTACGGCGGGGCACTTTTGAAACGTTTTTGTGCATCCTGATGCCGTTTTCAAGGATCGCAAGCACGTCGCATAATACGGTAATGCCGAATTAAGGCTACGTCGTCATAGTAGGTTAGTCATGCGCGTTGGAAAAAGAAATGACCAACGCGTTGATTACGTAGTCCCCAAGGAATAATGCTTTTGAAAGTGAAAAAAAAAAATAAAACTGAAAAAAGCCATGCTGTTTCCATCACGTGCATGTCACGTTTTTGCCGCCGAACTCTTTGATCATGTGATATGAATATGTTGGGTTA	-	-							-	0.650378	YDR510W	SMT3	G-SELEX
Peak_144	4	1489848	1490379	TTCCTCTAAAATCAAAAACAATATTAACTAATAAAGTAAATAATACAGTAGGAGAAGATGGAAAAGAAAATCAAGAATTTCTCGAGTTCCTTATATATGAGGAGAAAAGCCAGGAAAACCACCGCGATGACACACAGCACCATATCTCATGTAACAAACGTGAAAAAAGCGATGATTTTTTTTCTGCTTTCTTTTTCTCATTTCTCAAGCGGATATTCCGCTTGCAAAAAGAAAAGGCGTGGCTCTGGTCTTCGCTATTTTGGAAATAAACTTTGGCGTCCTACGCCCAGAAGCGGCCAAAGCGGCCAATCACGCCCGAAGACGGGACCGCACGGCTCCCAACGAGTCGTTTTTTTGGAACTGAAAAAGGCCCAACGTTGGGCCTAGGCCCTTACCGCG…	-	-							-	0.956811	YDR524C-B	YDR524C-B
Peak_145	4	1490701	1490943	CTGTTATTTTTACTAGGGTTTTTCCCTGGTCTGATCCATGCTTTGTACGTGATCAGCTGTCATCCATATGAGGAGAACGAGGCCCGGTACTCACACCTCTCCTCCTCGGATGATAACTATGGTAGTTTAGCATGAGTGACTCTTTCTACGTTATCCTCCTCCGCAGAATTTCGTAATAAGTGATGTGTGGCTCTTTTGCTACCCTTTTTTTTTCATTTCTTTCTTTTTTTTCTATTTTATTTT	-	-							-	0.783835	YDR527W	RBA50	G-SELEX
Peak_146	4	1498185	1498681	ATAAAGAAATTTATAGTTCCAATTGAGTGCATGCGAAAAGAATCGCAATGCCGCGAATTACTCAAGAGATATCTTACAATTGCGATTATGGCGACAATACTTTCAACCTTGCTATTGATATAGGAGGCACTCTGGCTAAAGTAGTCTTCTCGCCTATACACAGTAACAGGCTGATGTTCTACACCATTGAAACAGAGAAAATTGACAAGTTCATGGAACTTCTGCATTCTATTATCAAAGAACATAACAATGGATGCTATAGAATGACTCATATAATTGCCACTGGTGGTGGCGCCTTCAAGTTTTATGATTTGTTGTATGAAAATTTTCCTCAAATAAAAGGTATATCGAGGTTCGAAGAAATGGAAGGCTTAATTCACGGTTTAGACTTTTTCATTC…	1498452	-	ATGACTCAT		AT		RY		18.3034	2.13648	YDR531W	CAB1	G-SELEX
Peak_147	5	16022	16295	CAACAAATTGTCTGCAATGTCAACAGGAGTGGCGCATTTTATGTTTTTTCATTTTTTTTTTTTTGTGCGTGATCATTAAGCGGGATATTGTCCACAGTCATCTAAAAGAATGACCATTTCGACGACTTAGTTCGGAAAATATTTCCAGCGGATGACACCACTTGCCACAGTTGGTGACCGCCAAATCTAAGTCACGCGCGGAAACTGAAAGGTTGTGAGTATATAAGTGATCACTCGCTTATATAACTGACGAGGCAGAACAGGGTGCCAAAAT	-	-							-	2.70786	YEL071W	DLD3	G-SELEX
Peak_148	5	33541	34065	ACGACAGATTAAAAACTGGATCCAACTATAAGTATAATAGTAACTTATATATTTCTGTTCCAGATATATACGTAAAAAAAAGAAAAGGATAATTGATGTTTTTGCAAAAAGGGATTCCCTGATTCGGTTTACTCTGTTCGCAACCACTCTTCTTTCTGCTAATTTGTGCTTTATCTCGTATCATTCTCTTATCTACTTATCTTAACCTTATCGTCTTCCTCGAAATTTTCATTGATAGAGACAACTGCAAAAAAAGAAATTCAAAAAAGCCGTATGACTCACCCGGAAACCACACAGAAACCCTAGATTTCTATAGGGCAAATTTCAGGGTTATACTAAAAGATATATTATTGACCTTGGTTATTCTTCAAGTTCGCCCTATTGAAAATTCGGACACTT…	33818	-	ATGACTCAC		AC		RY		64.8715	2.19239	YEL063C	CAN1	G-SELEX
Peak_149	5	68916	69335	ACAGAACAAGATAGACGAGAAGGACACATGGAGGATTTGACAGGCAAGCTCAACACTTGCTTATATATATACACATATGTGCTATTGCAAATGCAAAAAGCGTATATCCAGTGAAGAAAAAGACGAAAAAAGACGAAGAAATAAAAAGAAAAACCGGTGAACGAATATGGCAAGTGAAAAAGTGCGCAATGAGTAATACAAAGGGCGAAGCAGCGGGAAAAAAGAAACGGCGCTGCTGCCCGGAAACCGGAAGCGAAGCTTTGTGGGGTACGGGTGCATGCTCGGCTTTTTCCAGATAGGGGAAGTGCCGTCGCCAAAAAGGCAAGGGTCCGTTTCGCGTGACATTTCATAGCGGGCCAAGCGTGGGTCACGTGCTGCACAGGCCTGCCGCTGGCATGA…	-	-							-	0.884464	YEL046C	GLY1
Peak_150	5	77619	77853	GTAGTTTCGCTAAATTTCCTCATGCGCGTTTGTAATTATGCTAGTTAACCATATGATAAGGTTGCCTAACTTGCAGTCACCGGAAGGTTATTTCCGGAATGGTGCAGAATAATTTTTAAAATAGTAGCATATATTTCGTTCCAATTCCCAAATAGGGAATTATAATTATGACAGATAAATTCCCGATTAGGAAGAAGCGCGAAAATTCTTGAAAAACTTTTTTCAACCTCGAAGA	-	-							-	1.04637	YEL040W	UTR2
Peak_151	5	141039	141415	AAGATGCAAGTCTTCTACGTATGCAATGATCTGTCCAACTCACCGAAACAAGAAAAAATTTTGCGTTTTTTTTTTCCTACAAATCCCCCATTTATTCGGAAGGTGTGGGTGGAGGCGTAGTTTTTTGTTTATTTTTTCCCAATTTACGTAGTCCCGCAGGTCGGTTTTCCTCTCAGTCTCCGTACATTTCTTATTTTTTACGTTTAAAGTTCGTTAACGAGGCAAAAAATGGCCTGTCTTCCTCCTTTTCCGCCGGCAACTGTAACTGTAAACTGTAAAATTGTAAGTGTAATTGTAATTGTAACTGTAATTTTAACGCTGAATTCTTGCGCGCTCTCGTTGGTTACTATCTTTTCTTCTTAATCGAAGTGTGTACA	-	-							-	0.656484	YEL007W	YEL007W
Peak_152	5	146167	146423	CATTTTCGTGAATGCTAGCTTCACTAGTAGCGATAATACTCTTCGGGCAAGATTTATGCAGGAAATCAAAAAGAAGTGGATAATGTGCCACATTTATTGAGTCATCTTTCAATAATTGTGCCTTCTTCGGGAGGTTTGCATTCAATGCGGTCAAATTGTTAACAATATCTGAAACAATATCATTGACACATGCGAGTTCTTCATTTAACGAGCCAATTTTTTTTTCCGCATTGGCCAATAGACGATCATTTCCATTG	146267	-	TTGAGTCAT		AA		RR-YY		2.94497	1.44761	YEL005C	VAB2	G-SELEX
Peak_153	5	152746	153178	TCGCGACTCCTTTTTTTCCATTATAGCGGCATCGCTTTATTTCGCGTTTTAATTCATTTTCTTTTTTCTTCATTTCTTTCTGCATATGCAAACGCGGCAAGAAGTGCCCACGGATCCGAAGAAAACCTAATACATTGAAGTTTCTCTCCCTGAGATAGGAACTCTCTCTTCTGCGTCAGAAAAAAAAAAAAGTACTCTTTCTGCATATATTGCTCACTACTGACTCACTGATCCTTTTACGAATAGTTGGGCAACACCTATTAAGTTGTAAAACAATCGCGAAAAAAAAAAGAAAACAACCAAGGCATCCCACTTTTCGAACCCTGGCGCTCGGAAGACTTAATCATTGCGAGGTCTCAATTGGCCGGACCGCCACCATGCAGAAAAATGGTGGAAAGT…	152969	-	CTGACTCAC		CC		RR-YY		8.2248	0.631025	YER001W	MNN1	G-SELEX
Peak_154	5	201889	202219	GAAGAGGCAGCCCGTGTTGCGTCACAATTAGGCCAAAAGAAGAAATAGATTGCTTTGCGTGAAATGTATGTATGTTCGCTTTGTAGCCGTATATTATTTTTTTATTACTGACCTTGCATTTTTTCGTCATTTTCCCGTCGGTCCGATAATGAATCATCACGATGAATGACTACCCCATAATAATGACACTAATTGGAGCGTATAAAAGAAAAAAATTATATAAATGTGTTTGTAATGAGTAAGAGCAATTGATTCATTTGAAATGAAAATCAAAAATCAAAATTAAAATAAAACTAAGCAACCATGTCAAGCGGCAGTACTATTGTTTCGT	-	-							-	3.0271	YER024W	YAT2	G-SELEX
Peak_155	5	226458	226869	TTGCCACTACGACAGACCCATCGAGGAAGAATTCATTTGCAAGCCAGATCCAAAATTCTTCGAAACAGCTAAATTGCAAAGTGGGTTGTCGAGCTTTGCAAATGCCTGGTTTATTGATGACAACGAAAGCAATGTGCGGAGCGCGTTGAGCATGGGGATGGGCCATGTTATCCATTTGATAGAGGATTACCAATATGAGTCAGAAAATATTGTTACTAAGGACCACAAAAATAAGCAACAATTTTCCATATTGAAAGATATCCTTGAGATTCCATTGATAATGGACGTTGAAGTTTACCGTCCATCCTCTATTGCCATAAAGGAAATGGAAGAGTTGGAAGAGGAAGGGGAAGCAGTCAACTGGTCAAATCAACAGATCAATGTTCAGTCATCATGACT…	226656	-	ATGAGTCAG		CT		RR-YY		4.70491	3.90514	YER037W	PHM8	G-SELEX
Peak_156	5	229539	229860	ATCTCTACCTGGCCCTTTAAACATTCTTAATATGATATATTCACATTTTTTGCTCTATTACCCGGCGGACAGGTTCCCGAAAGAAAGTGACATGGCAATGCTGAGAGAGTGGAAAGAGTCATCTTGCAAGACAGAGAAAGATGTTCAAGAGTGGTAAGCTAATGTCAGCGCAGTAGCCCATCCCACAATAACAGAGTGTGTAAGAAAGAGAGACGAGAGAGAGCACAGGGCCCCCTTTTCCCCCACCAACAAACAAATGCAAGACGACCCCGAAAATTCGAAGCTGTACGACCTGCTGAATAGTCATCTGGACGTGCATGGT	-	-							-	2.14554	YER040W	GLN3	G-SELEX
Peak_157	5	244997	245226	ATGGTTTTGAGTTACTTACAGGTCTGGAAGGATGGCTACTCGTTTTCTTCGAACTGGAATTTGGGACTTTCGCCGTTTTGGATTTCAAAATGGGGTGACTCTTCTTCGTAGTGTTTAATGCGGGGTTACTCGCAACCTTTTTGCTGTTCAGAACTCTCTTAGCAGCCATTGCAGCCGTTTTGGGTTTTTGAATTACTGAATTTGGAACAGTCAGAGAAGAGGTCGGAGAC	-	-							-	1.11943	YER047C	SAP1
Peak_158	5	257997	258492	GCGATAGCTATGTGAGCTTAAGCGATGGAGAGAGTATTGGCTACACAAATATCCTTCAATGAGTAGAGCACTGTTAAAATAGAAATAAAATAATTATCCAGCAGTATTCTTATATATGGATATTATACATTATTTCTTCGAAGCTAAAAGAATCTCTGGAGAAGACTGCGTACGGAAAGTGAAAAAAAAAAAAAGTGATGATGAAATTTTCGTTTGCTAGTGAAAAAGAAAGAAAAGGTGAGTCATGGGCCTGAAAAATACACGTGGTTAGAGCCACAGTAGAGTAAAAAGTTGATATTAGGGGAGTTCTAGAAAGAAAAGGATCCTGTGAGACCAATGACAGTGATTGTAAATTGTGGGAGTGATATTTGATGTTACTATCAAATAAGGCCTCAGCCT…	258238	-	GTGAGTCAT		AC		RY		34.577	7.22449	YER052C	HOM3	G-SELEX
Peak_159	5	265719	266256	AATATAAACGACCTTTCTTTGGGATTGCAAACAGTAGTCTATCGGTTAGATGGTTCACCAAATCCATTTTTCTATTGAATTTTTTAGAAACCTATCCTTTCTTTTCTATTTTCAAAGATTCAAACCGTTAATAGGAGTAAAATGCCAAAGTTTAGACGGTAAATACTTGCAGTTCACTGCGTATAAATGGACTTTCAGGCGAGTATATTCTGCAAAAATATTTTATAAGTTCCAACGGTAGAGGTGACTCACTTGGAAGCTTTTTTTTTCAATCGTTGGCTACGTGCGTACACGTGTTTTGCGGTCTCGCTTCGAAATGCCGAAATGAAAGAATTTCCGGGAAGAGTCACGCTGTTATCAATGACTTTGCAACTAATAAATTAACTAATAAATATTTTA…	265966	-	GTGACTCAC		GC		RY		28.5345	3.73967	YER055C	HIS1	G-SELEX
Peak_160	5	271245	271619	CTTTTGTAGGTCAGCAGCTCGCGCTATGGAGAAAGGAGTTATAATGAAACCACGTGAGCACGATGAAATAGCAATATGTTACTATTGATTACCGGATTAGAATGGTTAAAATGGTGAAATAAGAAGAATGATTATTGTGTGCTCAGTATCGGTTGAAACCACTAGTTTTGGCGCTTGACTCCACTCGTGAGTCATGTTTGGACTATATATGTGCCTTGAATATATATAAATATATATATTGCTATATGATCCCGCTGTTTCCAAGAGTAGTAATTACTAGACGGCTGTTGGCATATGTCAATGAGAGATTAGTGTACTCTTCGTACCATCAATCCGCCCATAATCTTCTAAGTGATCTTCCGATCGTATCCATCG	271435	-	GTGAGTCAT		AC		RY		5.9838	1.15972	YER057C	HMF1	G-SELEX
Peak_161	5	279363	279764	TGAGGTTCTTCTCTCATCCTGGCTAGTGAACAGCAGTTTATTGATGGCTGAATTTTCGTTTTGAAAATTCTCTGGAATCTTCCCCACTGTTATCGTTGATGGGATACTTTTTTCTCTGAGTTTGTAGTCCTCATTATAGTTGGGCAAAGATGTGATTGGTGTGAGTCCATTTTTGGAAGAGAGCAGATTCCCCCATGACTCACTTAATGATCTTCCCAACGGCGTTACACAGCCCAATCCTGTGATAACCACTCTTCTTGACATTTCTTTACTAGAAATTAAATTTTAATCCGTTGTGGCTCCTGTCACTTTCAAGTTGCTAATAACCTGATAACGTTTAAGGATTTTACTTCCTTTTTTATCATTTATTTTTCTGAGATGAGACAGAGTCAGAAATAA…	279561	-	ATGACTCAC		AC		RY		6.92244	1.89599	YER061C	CEM1	G-SELEX
Peak_162	5	286709	287305	AATAATTTTCTGGCCATGACCGAAGATGGGTATTCGATTGGTGGGAATGTCCCGCGTCTAACAGCAATATCTCTGGCTGAATAATTTCTCTTAGTCTTACTCCAACGTGAGTCAGACCACCATTTCTCAATTTCGGCAGCATCTGCATCTAGTTTTGCTTGTAAAGCTGCAAAATCGTTCTTCGTATTTCCAACGGGGATAGGCATTTTTCGTTGACTTTTTGTTATGTTATGCTAAGAGTTTTCTCTCAATTGTTAGGTATTTGGGTGTGAAAAGAAAAAAAGGATAAGATGAAATTAGCAAGCCAAGACAAATAATAAGAATTTTGCCAGTGAAGCAGCTCCTTTATATAATAAAGAAACGTTTTGTGAATTCCGATGTGCCTGGTTAAGGGCGGAC…	286819	287149	GTGAGTCAG	TTGAGTCAC	CC	GA	RR-YY	RR-YY	2.26446	0.850057	YER065C	ICL1	G-SELEX
Peak_163	5	294886	295440	TCTCTCCGTTTATAACGAAATGCAAGAAAAAAAAATCTCACCCATTTTTTTAAACCTTTGACGTGGAAAGGTATCTGGGAAAGGTATCTGGCTAATGAATAATGCCATAGCATATACCAGTATAGTCTATTTACTCGTTACAACGTATGAAAGCGTCAGCGCTGCAAGAATGACTAATTCATAGAAAATAATCATCATGATATATATCATAATGCACGGAACCTGCTTCGCTAATTTTTTCACTTAAATCACATTTTTTCAACGAAATCTCTTGCGCAGTTGGTTGGAATTCTTATCCGAATGACTCAGTCTACATCAAAAAACTGTGGCCGAATGGTGGTAATTGATGACTCTTCTATTTTTTTTTTTCATATAAAGAGCTTGCGCGCGTGTTGTTGT…	295190	-	ATGACTCAG		AG		RR-YY		22.3865	15.728	YER069W	ARG5,6	G-SELEX
Peak_164	5	303605	304068	AGAGTTAAGCTCTTGACTACTATTACGGTAAAAGCCGGGAACGTGCGTAACAATTTTTTTTTGCATTAGGTTAAAGAGGCTCGCTCGCGGAGCCTTTAGAATACCGCTTAAGGCGCCAAAAGATGGAAGCTATTCTCTTTCTTTTTTTTTTCACAAACTGAGAGGGGTTGTGTATCGTTAAAAATGTTGGAAGACTTCTGACTCATCACTACGCAGATTGTTAGAGTTTTTCGATGAGAATGGCTTCAAAGAACAGAACAAAACACGATTATATAAGCCCCATGTAAAAAGAACGTCTTAATTTATTTTGAATTTAGGACTTCTTGACATTTTTAGCATATATAACAATACGATAAGTGTCTCATCAAACGTGGTTAAGACAGAAAACTTCTTCACAAC…	303806	-	CTGACTCAT		CT		RR-YY		11.2402	3.33819	YER073W	ALD5	G-SELEX
Peak_165	5	337635	338010	TCAGAATCCGAATTGGCTGGTTTTCTTTGTTTTACCATCCCCTTCCATTTATCAGCATGATATTTTTTTTTTTAGAATAATCCTTTCAATCGTTGAAGTAGTTTGTGGGAAAAAAAAAGTTGTTAAAGGCATTAACGTACACAGTGATTTGCTGACTCATTACGATTTTTCACTCATCGAAGTATTGTTAGATTTTGATATATTAACATGACTAAAGGGCTATGGTCCATCGTAGCAGAAGGCAATCATCACTTTAAAACCGAGGCCACAATCGATAATTAGCACTGATATTCTGATTGGAAAAAAGGCAAAAAATGACCGCTTCCATCAAAATTCAACCGGATATTGACTCTCTAAAGCAATTACAGCAGCAAAA	337790	-	CTGACTCAT		CT		RR-YY		6.87551	3.66361	YER090W	TRP2	G-SELEX
Peak_166	5	419240	419472	ACAAGGCTTGGACGATCACCAGTCTTTAGTGGAGTCACCAACCAACCAAGTCCAATTCGCCCCGTTTTGCCACAACAAAAGTCATCGTTTTGTGCAACAGGTCGGTATGATAAGAGTCACAATAGTCTTCTTAGAAATTCTTCATCTCATCTAACGTCATACAACTCCGGCAGACCATCTTCAAGGACTGGCCGAATGAATTCACGCAACCAAAACTTACCGAAAATACCAAA	-	-							-	0.921071	YER129W	SAK1	G-SELEX
Peak_167	5	434561	434958	CCAGGGTTTCATCGGCCACAACGATGTGTACTAACCACTATACTAAGATGGCGACTTTTCAATGGAGAACTGTTGTATTACGGGCTCGAGTAATACCGGAGTGTCTTGACAATCCTAATATAAACAGTCTTAGGGAAGTAACCAGTTGTCAAAACAGTTTATCAGATTAATTCACGGAATGTTACTTATCTTATATATTATATAAAATATGAATCATACTAAGTGGTGGAAGCGCGGAATCTCGGATCTAAACTAATTGTTCAGGCATTTATACTTTTGGGTAGTTCAGCTAGGGAAGGCCGGGTTTTATCTCATGTTGTTCGTTTTGTTATAAGGTTGTTTCATATGTGTTTTATGAACGTTTAGGATGACGTATTGTCATACTGACGTATCTCATT	-	-							-	0.84061	YER133W	GLC7	G-SELEX
Peak_168	5	435636	435973	TGAGGAAACTCGGGCTCACTTAAAACGAACTGCATGTTTTAAAATCATTATCCATGCAAGTGTGGCATAAAAGCCGTAGTTAGATATATCTCAAACGCGCAAAAAGTTAAAAAGAAAGCCCTGTAGGGGGCTCGAACCCCTAACCTTATGATTAAGAGTCATACGCGCTACCGATTGCGCCAACAAGGCTCTTATTGTTGTTTTTCTGATTCTTATGGAGGGATTAGAGAGCAAAGTAAAGTACTTATATGTAATTTAACATTCGATGAACCGCGGATAATTAGTAATATGAAATGGGTGATGTTCATAATGTAGAGAATGTGGATTTTGATGTAATT	-	-							-	1.00353	YER134C	YER134C	G-SELEX
Peak_169	5	465557	465795	TGCGCTACATGCCCGTAATGCAGAATATAACCCCAAGCGTTTTGCTGCTGTCATCATGCGTATTAGAGAGCCAAAAACTACAGCTTTAATTTTTGCCTCAGGGAAAATGGTTGTTACCGGTGCAAAAAGTGAGGATGACTCAAAGCTGGCCAGTAGAAAATATGCAAGAATTATCCAAAAAATCGGGTTTGCTGCTAAATTCACAGACTTCAAAATACAAAATATTGTCGGTTCGTGTG	465695	-	ATGACTCAA		AA		RR-YY		2.42872	1.17383	YER148W	SPT15
Peak_170	5	485875	486106	GTTTCAAGATTAATCAGTGGTTCTTACAGTTATGTGAACCCCTTTATGACTCCATTAGAGTCAGGGTTTTGAAAGAGACAGATATTTGTACTTTGTGTGACTCAGTGACTTTGTTTGCTCCATATTATGAATTTGAAGAAGGTTCAGAAGAATACGTGAAGCAGTTTACCGACATTCAGTATGATAAACTATTCGAACCGATTGTCCAAAAAGTGCAGGCTAGATTAATTTT	485975	-	GTGACTCAG		GG		RR-YY		2.71031	0.884617	YER157W	COG3	G-SELEX
Peak_171	5	540282	540757	TCTTGTAAAAATCGGAGGGATAAGAAGGTCTTGAAGATGAATATCTTTCTGAGTTGAAATCAGAAGCAGAAAAGGTAGACATTATTATCACTTATTTTGTTATCTTGTTAGGAGATAATTCTCATAACAACTAATAAAGACTGCTACAACGAAAACATACTAAATTAGTTACATTCCTTTTCCTTTAAAAATGAAAATAAGGAAGATAAACTTTCGGAAAACCAGAAAAAAAAAGGATATTACTGTGAGTCATGAACATCAACACATAAGGTGTGATTCATTTATAGTAAACAACGGCAGAATTGCACCTAATTTTTCTGATTAGATAGGTTGATGGAACACCCTTTTTATTGGTCATTTAACAATGCATGAGACTACATAAAACATTTATCTGTTTTA…	540530	-	GTGAGTCAT		AC		RY		23.2664	-	YER175W-A	YER175W-A(TMT1)	G-SELEX
Peak_172	6	80174	80551	ACGTTAGGTTACGCACCTCAATAGCAAATTGGGAAACCATCTTGAGAGTTATCTAATATCTTGATATCTTATGCAGGAGTACTGGTTTTCTCCATACTAAAAATCTCTCTTTCAGAATTTTCGTTTTTTCTTATTTGAGTCATCCTCGAAGAAATTTCCGCAGCGAATTTTAAAGAAGCACTTTATAATAATACCTTACATATGAGTTTGTTTCTATGTCATGGGTATATAAGGTATATTGTATGCTATCTAGTTGGATGCCCCAGTTTCAAAATGTCCCTAATCGGATCCACCCAGATGTGACTAACGTGGTGCAAATTTATATTTATATGTGATAAGTCTTTCAACTTTGTGGAGATCATGTAACGTAGATTGAGT	80312	-	TTGAGTCAT		AA		RR-YY		4.29426	2.98774	YFL028C	CAF16
Peak_173	6	95490	95824	TTCATTATAGATGCATCCATCAGTATTACGGTGTCCTCACACAACCCTGTCTCTGCACAACGTAATACCTCCTTTTCCCGTCTGCTAGCTCTCATTTCGCGGTAATCCAACTTCAACCAGCAACCCGGATCTTCTATACGCAGTCCGGTGTGTGGGTGCATGACTGATTGGTCCGGCCGATAACAGGTGTGCTTGCACCCAGTGCCCAACGTCAACAAAGCAGGAACAACGGGCTGATAAGGGAGAAGATAAGATAAGATAAGATAACAAATCATTGCGTCCGACCACAGGCCGACACATAGCAGAACGATGTGAAGCAGCGCAGCATAGTGTTA	-	-							-	1.40178	YFL021W	GAT1	G-SELEX
Peak_174	6	103060	103408	ATGGTCAATGTCCTGACTGTGGACGAAAAGGCACGCTTATTATTTAGGAGTGATCTGATTCTTAACATTGTGAACTGTTAGTATGTTCTTTGATGGTACGACAGAGACAATCGAACAAAACCGTATATATATAAATATACGTTATATGTATATATATATCTATATATATTCGAGGTGAGTCAAAGGGTACGAATTATCATCAAATTGTTTATTAGCATTATAATACACTAAGTTTCCATTAAGTTGCTCCGCGGAGACTTCTCGCCAATGAGGGAACAGCCGTTCGAGATGATAAAGTATTCTAAAAACGAGTCATCATTAAAAACGATTCACGTGATATTCACGTGCA	103238	-	GTGAGTCAA		TC		RR-YY		2.41699	1.4781	YFL018C	LPD1	G-SELEX
Peak_175	6	118341	118637	GATGGACAGAGCTTTTTAGAAATTCTGGATTTCAGCAAAGCTTCAAAAATTAACTACGTTAGCAATCCCGTAAACTCCTCGTCGTCGTCTTTGGAATCCATTTCTACTTCTTTGGGTCTAACGAGGACAACTATAATACCATGACCTTTCCCAGAGAATAAGCATTGACTCATACTTAGATAATATAGCTTAATAAGTAGTTATATAATCAGTAAAAAAGTACAATAACAACTTCGTACATTTTATTGAATATAAACTGCAGCTAAACTGCTTGTATGTTCAATTTTAATTGTGTTT	118509	-	TTGACTCAT		TT		RR-YY		3.43775	0.558034	YFL008W	SMC1	G-SELEX
Peak_176	6	131045	131293	TTGATTCTTTTTTCCCTTTTTCTCAATATTCGCAGGTTATTTTTCCTTTATATATATACATTGTTTGTATCTTTTTTTGATTACCATACTTACTATTTTTATATTAGTCATATTAGATGTCACTTTTATATTATCTAAACAATTCAAACTTCTCACACTAACTTTTTCAGCATACTTCTACTGTTGTTCTCTGCTCTGGAAGGTATTTTCATCAGGCGATTGGTAAAAAATCAAGAAAGAATCTAAAAA	-	-							-	0.909354	YFL004W	VTC2	G-SELEX
Peak_177	6	189114	189555	AGCCGAAAATTGATAGCAAGAATACGACAGAGAATCGTGACAGAACGAACGAACCACAGAATGCCGTGACGATAACCACTTTTAAAGACGACACTCCAATTATTCCAACAAGTGGTACTAGTCACTTGACAGTTACACCTTCTGCATCGTCGGTTTCTTCTTCTTTGACCCCTCAAACCGAAGAACGTCCGCCAATAAGCAGAAGTGGAACAGGTATATCTATGACTCATGATAAAAGCACTAGACCTAACATAAGAAAAATGAGTAGTGATAGTAGTTTATGTGGACTAGCATCACTTGCTAATGAATATAGTAAAAATAATAAGGTGAGTAAGCTAGCTACATTTTTCGATCAAATGCATTTTGATGCCCTGTCGAAAGAATTTGAACTGGAACGTG…	189339	-	ATGACTCAT		AT		RY		13.1409	0.84802	YFR019W	FAB1	G-SELEX
Peak_178	6	200816	201045	ACAAGGGATGATATTTTAAATTTCTTCAGTGAAGTGGGTCCAATTAAGTCAATTTATCTATCCAATGCCACTAAAGTTAAATATCTTTGGGCATTTGTTACATATAAAAATAGCAGTGACTCAGAAAAGGCAATTAAACGCTACAATAATTTTTATTTCAGAGGTAAAAAGCTTTTAGTAACCAGGGCACAGGATAAAGAAGAAAGAGCCAAATTTATAGAATCTCAAAA	200935	-	GTGACTCAG		GG		RR-YY		3.01537	1.11545	YFR023W	PES4
Peak_179	6	204320	204761	CATTGTTGTTGGTCGAAATCAATAGGGATCCCGTTGACGTGATGGACCGAACCCACACAAAACTTCAAAATATCATTATTCTCCTTCATGAGTCGCTTTGCATATTCGATATGAGCCATGTCACAACTTTCGATCTCCATTCCTATAATGAATTTAGTCCGCACATCGGGTCTATCAGCATAACGAGTCTTGATTTCTTGCGCATGACTCATGAAATTCTTGAACGATGTTTCTAGCTTGGTTATGACTTCCTCAGGATTCTTGCCCAATGACTGCTCTTCGGGGTATATAAACTTGGCCTCAATTCTTGGTATGTGCTCTGTCAAACAGTACGTGTGAAAGTTGAGGTTGACCACTTGATCGACCACGGAATCCAAAGGGTCCGTACCGTGGGCACTA…	204527	-	ATGACTCAT		AT		RY		9.33943	1.81267	YFR025C	HIS2	G-SELEX
Peak_180	6	210127	210763	ATTATACCTCGAACGAATCGGAAATATTTGGTACATTATTGTTTCAATTTCAATTTGTTTACCTTTGAACCAAGTGAAGAAAAACTTATGGTGCTAAAAGTACATTCCCCGTTGAAAGTGATACAGCTTTCTTGATTGACACAATAGCAATGGCCTTCAAATGCATATCTCTACTATCGGCTAAAAAACGAATGACTCACGTTATCAGGCTCATAGCTTGTGTGTGTGTGTGTGTGTGTGTGTGTGTGTGTGTGTGTGTGTGTGTGTGTGTGTGTGTGTGATTGTTGTTCTAGTCGCTTGCTTTATAAAGTAACGACACTTTCTGGTGCCAATATGTGAAAACGCATTACAGAAAAAAACAGTTGTATTCTACTAAAAACACATCAGTAGTCACAGAAG…	210322	-	ATGACTCAC		AC		RY		11.0172	0.799569	YFR028C	CDC14	G-SELEX
Peak_181	6	242577	242978	GCGGTAAAACACATGTATCAAACAAGAGGCCCTGCTGCGTTCGTCCAGGGAACAACAGCCACCATATTTAGGCAGATAGCTAACACCTCTATTCAATTTACTGCATACACAGCATTTAAACGGTTGTTACAAGCAAGAAACGACAAGGCATCCTCAGTAATAACGGGGTTAGCCACATCTTTTACACTCGTGGCAATGACTCAGCCCATTGACGTCGTAAAAACAAGGATGATGAGTCAAAATGCCAAAACTGAATATAAAAATACCTTAAATTGCATGTATAGAATATTTGTTCAAGAAGGCATGGCCACATTCTGGAAGGGCTCCATCTTTAGGTTTATGAAAGTCGGTATTTCAGGAGGCTTAACGTTCACTGTTTATGAACAGGTTAGTTTGTTA…	242812	242776	ATGAGTCAA	ATGACTCAG	TT	AG	RR-YY	RR-YY	9.50369	2.96817	YFR045W	YFR045W	G-SELEX
Peak_182	6	250397	250842	CTTAATGGAGGTTCCCATTTCTTGGTCCATGTTGACAACTTCAGCGTCAGAGCATGTAGAAGACTCTGTATTTATGTCTACTGGCTCCTGAGGGAAAACTGGAATGGTGAAGATCACATCAGCGAGTTCTGTTTCCAGGACGCTCTCATACTCAATAATGACATCAAAGCCCTGTTGTGATTCGGAGGGGGAAACCCATGTAGTTAGAGTTAATGGAATTAATGAGTCATCTTCTGCGGGAGCGACTTTACGCCATCTTAGAACACCCAGGCTTTGGTCGTTGGCTGGGAAAGCCTTAGATTTATCACGCAGGGAGATAAGTTTAGTGGATAGGAACGATTGTTTATCTATGTTTGGATGGGTCTTAAACTGGAAGGATTTATCGCGAACGTCAATAGA…	250622	-	ATGAGTCAT		AT		RY		15.288	0.735258	YFR050C	PRE4	G-SELEX
Peak_183	6	263385	263797	TTTCTTGCTTATAACCAGAACCTCTATCACAAAATTAGAAACTGCGATACTATGGGTCAGATCGACACATAGGGAGCACTATTAGGCGCAAGGCGTATACATAGGCATTGCGTGTTCAAAAATTGTCGTATGAGAAAAGTTCCAAACTTTCCACCATTACTCACCAACAACTTACACCAGCCCGGATTTAAGATTTAGCTTCCGAGAATATTGTGACTCAGCCACTGGTCTCTTGAATGTTGCGTGTAGCTTGATTAAGATTATGGCATAACCGTTTTTTTTACTTGGCAAGAGTGAACGTCCTTTTACTCCAAAAGGCTCCTGATGAAACTGGAGAGTCTCTTTGTTCTGAAATTTTTAAAGTTTAGCACACCATATTCACGCTCGAGGTGAACCCAA…	263601	-	GTGACTCAG		GG		RR-YY		13.3169	2.00939	YFR055W	IRC7	G-SELEX
Peak_184	6	267136	267611	GTATGCAACTGCTCTACCATCATTACCATCTGTAACAGCCGCTAGCATCAAAGACGGGTGTTGGAATTTGACAATTTGCTTCAATGTATCCAAGGAAGTTTTAGGTAATGGCAGGCTAAATCTTCCAATCAAACAGCAAAATACACCTCAAGACGCCCCAAGAATTTTGAATGAAGGCGAGCTGAATCCCGAACTTTGTTCTTTAATGTACAATTTAATACCAAAATGATTATCCAACTTGATTAGCTTCGATGACTCATACAGATCCATACCAATATCAACTTCACGGATAACTTTTTCAACTCTTTTAAATTCTTCAACATCATTTTTCGATCAAACTGCGTCAGGTTTTACATATAGATCAAGCGTTGTCGGTTTATACTACGATGTCATTTACGA…	267391	-	ATGACTCAT		AT		RY		20.9316	0.491323	YFR057W	YFR057W	G-SELEX
Peak_185	7	20334	20758	GCCAATTCCTGCGGTAAATTACACGGCGATTACGGCGACATGAGCTCACATTCATCACTCTATGGGACAAATGTTTCCAAACTGGGCGCAACAAACACCTGATGTGACTCCTACCCTTTGGACAATGCAGATCCACGCTACGGCAAATTAGTCAAATGCACTAGAACATGGCGCAAGTACTTATTGTGACCTTTGGGGTACCGTTACCGTCAGTTTTCTTCAGCTAAGGCGCGCGCGCCAGATAACTAAAAAAAAATATAGTTGCTGCTTAAAAAACAATACACCCGTACTCTCTTGCCTGTAAAAACCTCGAAGGACCAAAGATACCCTCAAGGTTCTCATCTGTGCGGTATTCTTCAAATTACAATGACATTTCCCAAAATTATCAGATGTGCTCAG…	-	-							-	0.604089	YGL255W	ZRT1	G-SELEX
Peak_186	7	56024	56360	CTCTTTGTACGTTCCTTCTGCAACGCCATATCTAAGTAACAAGAAAGAAGCCACAGCATTACTACAACCCCACACAGGGACAGACAGATATCATAAACTTGAATCTACTATATCATACTCTAATAACTACCTAAGCGTTAAGAAATCGTCTAATCTTCAACTGCCGTTGTTCATACCGTGACTAATAGTGGCAGTAAGCAGCTTTTTTTTTTTTTCAAAATTTTTCATTTTTTTTTTCAGTTGACTCGCCCCGTCGGTAGTGACAAGTGCCGACTGACTCGTGTCCTGGTAATAACAGCAATAATGAATATGCGATGGGCTTGAACTTGGTATTTAA	-	-							-	1.10823	YGL236C	MTO1
Peak_187	7	66731	67119	GCAAAGCTGTTTCCAACAAGATCCTATCAATAAATGACTGGTTAAGGTCACTCCTATCCCGAGACTCGGTACCAAATTCGGACTCTGACTCCATAGAAGGCTCATTCTTCTTGTCGTCAGTTGAAGAGGTCTCATTTCCCTCCAAACTACGAAAAATTAGATAGTACTCTTCAAGTATCGAATCAATTCCGGAATGACTCAGCGTCTCTCCAAAGGGCCATAGTGACATATTTTTATTTTATTTTAGCTTTATCGAAAAGCAAGAGAGCAGTAAACTGGACGGTATAGAAGAAAAGAGAACTTAATAACAAAAGACCAGATTGTCTATAACTTTATCTCACACCAAATACCAGGTTGTCCTTTTCCCGCTGGGTGAAGCAACCGTTTCA	66928	-	ATGACTCAG		AG		RR-YY		5.83128	1.61994	YGL229C	SAP4	G-SELEX
Peak_188	7	78646	78902	GTGGATGATTTATAGAGACAGTTGTCGATATCAAAAAAGAAAACTTTTAAGTTCGGGTTTTGAGGTGTAGCAGAAATATCTTGATCGATCGGAAATGTCACTTTCGAACCTGGATGAGTCAATGATTCAAGATGTGCTTTATTCTTGGCAATTTGTTCGTTCACCTCATTCTGATAGGTTGCCAAATCGGATGCAGTATATTCAACAGTCATGAAGCCTAGTAATGATTCGGTCCAAGAGCTTACTCATGTATTCCG	78763	-	ATGAGTCAA		TT		RR-YY		2.74551	2.4296	YGL224C	SDT1	G-SELEX
Peak_189	7	79006	79400	ATATATATATATATATATATATATATATATATGTATATATCAACGCCCATACCATTATCATTATCAATAAGTTTGCGAGGCGGGTACCCTCCCTCGTGCTATTATATTACTGTTGCCTTAATTGAGTAATTTGATCGATGACTAATTGCAAGAGATTGTGATTGTTGTACGAAGTTATAAAATCATCCACAACACTCGTTGAGTTTTCCAGTGGTGAAGGTAAGCGGGATGAGATCTGAGTCTTAAACTCTTGCAATTGAGTAATCAATTTATTTCTCAAATCTGTCAGTGTCTCTTGAGGGCATTTATACAATTCTAAGTTTTGTAGGATTTCAATCGTAGGCTGCACCGTTTGATAAATTTGCAACGTGGTATCATTGGTTAAACCTTTTGAA	-	-							-	2.4296	YGL224C	SDT1	G-SELEX
Peak_190	7	115687	115999	TCACCTCATTCAAGAATCTGGCTTCTGAATTGCCATTGATAGAAGAACAGTACTAAATTGCGCCGGAATAATGAAGAACATCCGGGTTACCTTAGATGTCTTTTTTTCCTTTTTTTATCACATTTTTCACTCTGCACTTTTTCACTTTCTCGAGGTCCAATCTATGACTAATATTAAGCGCATTTCATTTGAAGATATGTGTATCGCAATCTTTTTTCTTATCTTGTAGACCCTCCTATACACATCTCTAGACTATATATTTGGTTTGGTTATATCTTTAAGAACTTATTTCTTTTTCTTATTTTTCCATTCC	-	-							-	3.04377	YGL202W	ARO8	G-SELEX
Peak_191	7	120114	120494	ATTTGAAAAACACGTTCCGTCTGTTCAGGTGACGTAGAAGTTGTTATTGACCTCGTTGCCATGGCAGATGTCCCATTCCCTGGTGCGGCTGATGATCCAGAATCTCTTGGTAGACTCGACCCATTCATATCATCGTCCTGTTGCTCATCTTCATCCGCTTGACCTTCGTCACCTTCGGATCTCTTCAATGAGTCACTTGTGTTTAACAATTCAGGTGCATACTTTCTTACTACTCTTCTTAAACCCTTTTGTAAAAAAGGCAAAAATCTGTAATATTGTTCTGAGATAGCCATAGCTAGAGCACCATTTTCTCTCATGGATAAATGCTGATAATCTATATAAATGGTGTTTAGGTCATATATTTTCATAAATTCAATTTGA	120305	-	ATGAGTCAC		GT		RY		6.69951	0.875587	YGL201C	MCM6	G-SELEX
Peak_192	7	122104	122465	TATATAGTAATATATTGCTAATATGAGCACTAGTTGATTCTTGTTCCAACAGTATATTCCAAACATGTGTTAATCACGCGTTGATACAATGTGGCTCGGCTACAAATCAGTTATTAACATCGTGAGCTATGTTTCCCTGAAATGGGGACGTTTTCCAACGAATTAGCCTTGTTGGCGCAATCGGTAGCGCGTATGACTCTTAATCATAAGGTTAGGGGTTCGAGCCCCCTACAGGGCTATTCTTTTTTTGTTCTATATGAACAGAGCTATTTCCCTTCTAAGAGTCCCACATAAAAGTGCTCTGGGGAAAAACGGACCACAGCATGTCCTGTGGTACTTGTTTCTTTCAAGTTTTTCGTATG	-	-							-	0.721125	YGL200C	EMP24	G-SELEX
Peak_193	7	156186	156586	GTTGTTTTTATCAGCTTTGCTTCTGGCCACATTTCAACCAGGTCTCAGAGGATATATGGCCAGAAGGCCCCTTTACACACTTTTGAGATGCGATGAGTCTTCCAAGGTAGGAGCATATGCCTCCAACAGACTTCGGCCCGAAGCATGCTGTGCTCACGGGAATTATATTGTGTGAAGCACATGCCACACTTTCCAAAAAAGAGTCAGAATGAGTCAGCCGGATAACCAAACGCGGACTGTGGCGCCACGGAAAACAGTGTGGCAAATTTATGGGCGGCTAATCTGCAAGCTCTATGCCTGGAAATGTAGATGTAATAATCAAGACACTTTTGTTCTTTCGTGTATAGTGCATGAAGGTTAAACCTCCGTAAATTCCTTGAACTCTTCTGGAATTCCAAA…	156398	-	ATGAGTCAG		CT		RR-YY		21.002	17.6743	YGL184C	STR3	G-SELEX
Peak_194	7	159020	159482	AGCAACAGGCGCCATTATCTTTTCAGCAAATGTCGCAAGGAGGAAACCTGCCACAAGGTTATTTCTACACACAATAAAAATAAGATACATTGCCGCTGCTCCGCATTACATATCATATAGAGTGACACTAAGTAATTAAATGACACTAAGTAACGAAAGATATCTGTAAACAACGACTATATACCAGAATTAGTCATATTCTCTATTGTATTCACCCTACACAGCCGCATTACACAGCTGCTCCGGACGTTTTACGCTGCACATCAATGACTAATACCACTGTATTTGATCCACACTTAGCGCAAAAGTCACCTGGGTGGCGTTTTCCGCTCGCGCTCCGCCGGTGAGAGCGAGAAAAAAAAAAGGGATTGGGCGGTAATGTAAGGAAAACCCACTAGT…	-	-							-	4.75811	YGL180W	ATG1	G-SELEX
Peak_195	7	169594	170108	CTTGCTTACAACAAAAATAGTAACGCAATTGGGCAAAACAGCTCTAGTACATTGAATTACGGTAACTTTTGTAACGATTTTTCATTGAAAATTGGTAACTTGATTGTCCTTACAAAAGAATTACTTCCAAGTATTAAAACTACATCCTATGCAAAGAAAATTAAGTTGAAAGTTAAAGCTTATGCAGAAGCCACAGGTATACCATTCACTGACATATCTCCTCAAGTCACTGCAATGAGTCATAACAATCTTCAAACGATTAACAACGAAAATAAGAACCCCCATAACAAAAATAGTCATAATCATAATCATAATCATAATCATAACCATGCTCACAATAATAATAACAATAATAATCAAAAGAGTCATACCCGTCATTTTTCTTTACCAGCTAATGCT…	169832	-	ATGAGTCAT		AT		RY		18.3855	1.15312	YGL178W	MPT5	G-SELEX
Peak_196	7	185546	185920	TTGGAAAGGATAAATAAGCGGTTTAAAAGGATAAAAGAAGCGCAAGCAACAAATCTCAACACAAGTGTAAACCATATGAATGGGGTTAAATGCCTTCTTCTTTGAGATATAAAAAGGAAGTAGAATTTAATATATTAGACATTTTTTTGATTTGAGCCTAAAAAAGATAGCCCTGTAGGGGGCTCGAACCCCTAACCTTATGATTAAGAGTCATACGCGCTACCGATTGCGCCAACAAGGCTATTTCGTTGAAAAATTCAGGCTTCAAAATTATTATATGTATCAAAAATATTTTTTTGAGAAATTTCAAATCATTATCTACGCTAGCCTTACTATTTTTTCACCCAGAAGATAGTAACCTCATCGCACATACCT	-	-							-	0.970284	YGL169W	SUA5
Peak_197	7	220401	220634	GATTCAGAGCATGTTTTCGATTATTTCTTCTACTTTCTTGTACTATATGATGTGAAAACCGCGGAGGAAGCCAGTCAACTAATAGAATATATGGAGAACGACGCAAAAAAAAGTAAGGGGGACGTTGATATAAAGGGAGAAGACTTACATGAGAAAAATGACTCAGCTGAGGTGAGGCAAGAAACTCAACCAAAAGCTGAAGCTACCCAAGACGATGATTTCGATATGCTTTTT	220562	-	ATGACTCAG		AG		RR-YY		2.33486	0.986867	YGL151W	NUT1
Peak_198	7	226054	226462	CCAAAAAGAAGTGTCTTTGATGACTATACAGACCATTCAGCTTCAGAACAGACGTAACTCAGCATCATTCTCTTGCGTTCTTTTACCATTTCTCTTGCCCTTTTGTCGTATTTTTCTCTTCTATAGTATGAGTACTTCCTGTTTTTCACCTTCCACGTGGATATTTTCACGTTTGCGCGCTGCGTCTTTCTTTTTCTTTTCTGGTGACTAATCGGTGGTCCATCGCTGGCCAATGAAGCATATAACTGATGTTTAACATTTAAATCTTGGTTTAGACGGCATCATCTAAGCGTTATTCTCATCGTATAGTATCGAAAAAAGAAAATAGTATCATAGCACAGAGGCATGTCAACGTTTGGGAAACTGTTCCGCGTCACCACATATGGTGAATCGCATTGT…	-	-							-	1.96038	YGL148W	ARO2	G-SELEX
Peak_199	7	271955	272345	TAGCATGCGACCACCCAGTAATCATACTGCTGACGCTATTGGTCACGTGGTTATGGCAGCTGCTGTTGACTGCGGTGGCGTCCCGTTTCCACACCGTACGTGAGCACATGTCTGGATTGCTAGCTGCGTACATAGTGACAGGCCTTGTCTACGCTCGCGACGCAGCCGCGCTACGTCCAGTATGACTCAGGAAAAGTTGGCGATAGACCACGAGCGACTGAAAAAATAACAGCGACTTTTCTCCCGGTAGCGGGCCGTCGTTTAGTCATTCTATCCCTCGGATTATAGACTGTGAATATTGCATATGCAACTTTGACTCAAATTTTTCCAAAATTTGATATATATATATATATATATATGTTTGTATGTATATATATATATACGTATATAT	272140	272271	ATGACTCAG	TTGACTCAA	AG	TA	RR-YY	YR	7.68508	3.806	YGL125W	MET13	G-SELEX
Peak_200	7	288023	288584	CAAGTAGAATTCTTTATTCTCTTTGTGAATTCCTAAACCCATGAAAGGGACTTGTAGTATAAGCTGGATACCTATTTTCATTGGCTTCGTTTCCAAATGACACAAAACCATCACAAAAGGAAATAGTCCTTCCATAGTTACCCAATCATTCTGTTGCATATTAAATGAACAGCTCCTTGTTGATAATGCCAGTGTGGCATATTCACCGCTGCAGTTATTTCTTTTCATATATAATGAGTCATTTGTTTCTGTCATCACTTTTCTATACTTTCTCTTCCCCGCGTGTTTTCCGTACACCAACAATATATGCCATAATACACGTAACATTTTTTTATAAAAAGAAAAGGTAAGTGATATATATAAAATAGCGCCATGAGTAGGAAACTTTTCTGTTACTGC…	288260	-	ATGAGTCAT		AT		RY		22.1518	7.46731	YGL117W	YGL117W	G-SELEX
Peak_201	7	309007	309548	ATGGTTCATTGCTATTCCCATAATGAAGGCGGTAACAGAAACTAAGACGGTGGACGTCATCAGAAGCGGTTTACGTGGCAAACTATGAATTAGCAGAGAAACTAGTATGGTGACTAATACATTCACCATACTAATGAAAAAGTTTATCCTAATTGCGTGCTGAGGATACAGTTGACTAATTATCTTGGTACCATATAGTACAATGGAGTTTATACCGCAGAATTGTTGGCCAAATAACAATACAGTGATAACATGGCGAGACTTGACATTTGTTCTGTCCCTCAAGTATTTCCATAATGAATTAGAACCGCTAATAGAGTTCGTGGTGGTTGGTTCAATCAACGGATCCCCAGATTCTATTTGCAGTTGCCAATCCTGTATCTCTTGTGCGGCTTCATC…	-	-							-	1.49953	YGL104C	VPS73	G-SELEX
Peak_202	7	313232	313542	ATATGCAACCATTTGATAGTGGGCATGATGATTTAGTTCATGATGTCGTTTATGACTTTTACGGAAGACATGTGGCAACATGCTCTTCTGATCAACATATTAAAGTTTTTAAATTAGACAAGGACACGAGTAATTGGGAACTCAGTGACTCATGGAGAGCTCACGACAGTAGTATCGTGGCCATTGATTGGGCCAGTCCAGAATATGGGCGCATCATTGCTTCAGCCTCTTACGATAAGACGGTAAAATTATGGGAAGAAGATCCCGACCAAGAAGAATGCTCTGGCCGTCGTTGGAACAAGCTGTGTACC	313380	-	GTGACTCAT		GT		RY		4.75184	1.01982	YGL100W	SEH1	G-SELEX
Peak_203	7	323722	323949	TTCTTCAACAGCATTATGGAAAATGCATACCGGAGATTGCTCATACAGACCATAAAAACAACAGAAAGTCTTGTGAGGAAGATAAGCAAGCACGGTAGGTAAACCAGATATGCACATAAATTACCGCTGACTCTCCCCTAAAAGAACTATATTGATGGTCTGACATATAAGGCACCGCTGAAAAGCATGTACAATTTTAATGTCTTTGCATTTGCATAGTCAGTGTGG	-	-							-	1.4004	YGL096W	TOS8
Peak_204	7	325463	325728	TCATTTGTTCCTAGAACAAATATAGCAGTTGGTAGCCCAGTTAACCCGGTTCCAGTATCATCCCCTGTTTTTTTCATTGGTCCTTCTCCACAGAGAAGCATTCAGAATCACAACGCTATTATGACTCAAAACATACGTCAGTATCCAGTTATATATAATAATAACCGAGAAGTTATATCTACGGGTGAGAGAAATTACATAATAACTGTAGGGGGGCCTCCGGTAACTTCTTCGCAGCCCGAGTATGAGCATATCTCAACTCCCAA	325587	-	ATGACTCAA		AA		RR-YY		2.78071	1.4004	YGL096W	TOS8	G-SELEX
Peak_205	7	328506	328842	TATGATTGGTTATACGGTGTAAAAGTTTTTCCATATAGTAATTTACCTTTGTAATGGAATTTTTCCAACAATTATTGTCCGATATAGTGTAACGGCTATCACATCACGCTTTCACCGTGGAGACCGGGGTTCGACTCCCCGTATCGGAGTTTTTTGTCGTAAGTTGAGAAAGTTTTTTCCAGTTAAGTTATTATGACGCATGCACATAGAAGGATCACCGAACAAAGTTGCAATTATTAGGCACCGAATGAAGAAAATGAGAACCTAATTTCGCTTGGCAATAGTAAAATGTTTTATCTGCATCGAAAAAGTTATATAGATTTATGCCTCATATATA	-	-							-	1.14029	YGL095C	VPS45	G-SELEX
Peak_206	7	379906	380160	GCAAAATAAAATTAGAGAATGAAATACCGAATATTTCCCAAGGATAATACTTTTTTTCTTTCCATATGACTTTCTCGACGTTTTCTTCAAATGACTGAGTCATTGCTTCCCTAGAAAAGTATTTCTTGACTCTTAGCGGGCCATTCCTCTCAAAGTTCACAGAACCGTTCTGCAAGATCTTTCTGCTTTCATCAATTGCAGTAGCCCATTGAATAGGGACGGCAGGTTTTAGCCACCCAGTGGCAGAACTTTCAT	380004	-	CTGAGTCAT		AG		RR-YY		3.12096	1.05754	YGL065C	ALG2	G-SELEX
Peak_207	7	392360	392888	GAAGGCATACCCTTCAAATTCCGAATATATCAATCCGCAGCATTACTATCATAATAGAACGGTATTAGTAGAAAATTACTTAAAACGAAGTCCAAATCCAGTATCATTAACGCAGTTAGCGCAATATTATGACGATTCTACCAAGCTGACCAGAACCAAGATCATCAATTCCGGGAAATTTGTAAAAGAAGAACTGGTAATTAGGATCGCGCATAAATTAAATCAATTGCAACAACTTCCATTTAATGTTGTGAACAACTTCCATTTTGTTCAAGTTTATGAGTCATATTACAATATTTTTGAAAGCTTTAGAAAATATCCGACTATAAGAACTTTAGAGGACGCTTCTCAATTTGCAGATTTTATCAAAAATATGCTAGAAGGCTTCAATACTCTAAA…	392642	-	ATGAGTCAT		AT		RY		29.5201	3.9551	YGL059W	YGL059W	G-SELEX
Peak_208	7	420913	421203	GCTTGTAGCAGATAGAAAACGTTCCGAAAGATGGGTTCCAATTGATGTAACACTTCTTTTTTATATATTCATGTGGACGTGTACGCCTTCTTCCCTTCTTTGCCTCTTGTGCCACTGTTAATCCTCTTAAGCATATTGTTTTTATTTACAGACATTGGCTGACTCACCAGAAACTATAATTGACGCTGATTTCTAGTTAATTAAAAATAAAATATATGCAAGAATTAGCACCAGGCAGTCATTTCTGTAAATTGCTTTGTTTTCTATTTCAAATTTGTTTTTTGTATATGT	421075	-	CTGACTCAC		CC		RR-YY		3.954	0.914572	YGL040C	HEM2	G-SELEX
Peak_209	7	437080	437379	TTGCATGTCAAATTTCAAACTGCGTGTAATTACCGTATTCGGAAATTACATGGTTTCAGTAATTTTGCAATAAACGCAGCAACCGGTGATGGCGAAGTTTTACCATCAAACAATAACTTATAATAACTGAATGCCGGCAGGTTGAAACAAATTCTTGAAAATTAGTCATTTATTCTATTGTGCGAATGTAATCCACTGAAATCATCTAAAGCACCATTACCATTGTCTAGCCTGTGAATAAAAAAATATGGGAGTATAATGATAGAGAAGTGGATGGTAGATTATACCTCGCGAATGAAT	-	-							-	5.12434	YGL032C	AGA2
Peak_210	7	448484	448762	TCCTGTTTTCTTTTTTAGCGTTAGCAAATGTTTGTCTGAGTTGTTCTGACATGGTCTGTCGGTGTGCTATGTCCCTTTTTGGAGCAATCGATGTTTACAGTCCATAAAAAGTGTAAGAATCTCGATGATTCTTATATGACAAATAGTAAAATTAGTCATTCTTCCACGGTCAAGAAGTGAAAAAAAATAAAAAATAAAAAGAAAAGCCTTTCGGGTAATAAGGTATAAAGAATAGAAGATTATACAGATAATTACTATCTTGGATACATAGATGCACCA	-	-							-	3.58576	YGL026C	TRP5	G-SELEX
Peak_211	7	455857	456172	ACGTGTTGAAGAAAAGGAATTCGCAATCAAGTTTGAAGCACAAAAGTTCACATGCATCCTTACAAAAATTCAAAAGAAACAAAGGAAAGTCCTCCATGATAGCACCATCGACAGCAACTAATAGCAGCAATGATGACTCTTGTAGCTACAGTTCCAAAAATTCTACGTTGAGTCACCGAATATCGTTACCTGTACCGGACCAAGTTTCCCGTGATAAAATTCAGAACAAATTAAGATATTCGACCTCATTACTCTCATTAAATTCTAAATCATCTTTACCGATGAACAAAAATGATCATGATGAGACACTTCTAAG	456028	-	TTGAGTCAC		GA		RR-YY		3.51988	0.661895	YGL021W	ALK1	G-SELEX
Peak_212	7	466299	466719	TCAATTCGCTAATGGCCCTCCGTCGCAAATGTTTCCACATCCACAAATGATGGGTGGAATGGGCTTCATGCCCTACTCTCAAATGATGCAGGTTCCTCATAATCCTTGTCCATTTTTTCCGCCCCCTGATTTTAATGATCCAACAGCACCATTGAGTAGCTCGCCCTTGAATGCAGGCGGTCCACCAATGTTATTCAAGAATGACTCACTTCCATTTCAAATGCTGTCTTCGGGTGCTGCGGTAGCAACTCAAGGTGGACAAAATCTAAACCCATTGATAAATGACAATTCAATGAAGGTATTGCCAATCGCATCGGCTGATCCGTTATGGACTCATTCAAACGTACCAGGATCAGCATCTGTAGCCATTGAAGAAACCACCGCTACTCTACAAGAAAG…	466503	-	ATGACTCAC		AC		RY		10.149	0.988652	YGL014W	PUF4	G-SELEX
Peak_213	7	478850	479084	GCAAATTTCGCCGGTCCCGGAATTTTCGTTTCCGCAATAAAAGAACCGCTCATCATCATAGCGCCAGGGTAGTATACTATAGAAGGTCAGACTAAACTGAGTCATCTAGAGTAATGACGCCTTAGTAGCTTTTACATCTTCATAAGAAAAGGAAACTTGTAGAATGGCCTGGCGATTTGTTTGCTTTCTTGTGATGAAGAAATTTCGATGCGATTAACCGGCAAAATCAGTAAAG	478950	-	CTGAGTCAT		AG		RR-YY		3.40256	0.332135	YGL009C	LEU1	G-SELEX
Peak_214	7	519899	520345	CTATGACTTTGCCCCATGCAATTGCAGCCGCGACACAAGTTCCCGAGCCTGAGGGCTACACCCTAATCACAATAGGGTTCAAAAAAGCTTTGAACTACGAATTTGTTGTATCAGAACCAAAATCATCGGCTCAAATCTTCGGATACTTGCCTGAAGCTCTGAACACACCTTTTAAGAACGTATTCACAAACATTACGGTACTACAAATAGTGCCATTACAGGATGACTCACTCAACTACTTAGTAAGTGTTGCTGAAGTATACTTTCCAACTGCAGAAATAGAGGAGCTGTCAAATCTAATTACCAACTCTTCAAGCGCTTTTTACACGGATGGAATGGGTACAGCAAAATCTATGGCTGCAATGGTTGATTCCTCAATACCGCTAACGGGCCTCTTAC…	520125	-	ATGACTCAC		AC		RY		11.9911	1.01474	YGR015C	YGR015C	G-SELEX
Peak_215	7	526631	526901	TTAATGAATTATGATTGTATATTAGCGAGGCCGTGTCACGTTCCCTTTTTTGGTCTTTATATATGTGTATCTTGTTATAATTTTAAAGAAAAGTTTTATATTACTCATCAGTTGTGTGTGAAAAATATGGGCGGGTATTCACAATAGGAAAAAAAAAATGGGTTTGGTGACTGCAGTAAAGACGTGCTAAAAAAAAAAAAGTTGTTTTTATCTGAACCTTAAATATATCATTTATGAGTGTATATATTATACAAACGCAATAACAGTGGCT	-	-							-	1.17381	YGR020C	VMA7
Peak_216	7	544531	544799	TCAGTGGTATTAACCTCTTCTAAGAAGAGCAGAAAAAGAAAAAAATCTCCGCGACGGGGAATTGAACCCCGATCTGGCACGCGACAAGCGCCCATTCTGACCATTAAACTATCACGGAAGAAATATCTGTGAAATGTGACTCTTATAGCATACTATTTTAGTTATGAATTGTGAAAATCCTCCCTGTCCTGCGTTCTACAATTTATTTAGTACTTGTTTGGCAAAAACGTCTCTCAGTGCCATTTACTTTGTAAAAAGTGCAGACTACA	-	-							-	1.90662	YGR029W	ERV1	G-SELEX
Peak_217	7	592366	592792	AAGCTATATCCGAAGTCAAGAAAGCCGAACCTTACATGCGGTCGGAAAGCAAACGAGGAGATTAGATTGGTTTTCATATCCGCTAAATTTTCTTTTGATTTTACTTTGGCTTAATCTAATGCATGTATATCGGAAGAAGCAACCGATCTGGCCCAGTTGAGTCGTGCTACCTTAGTCATGCCCAGGAAAACCGGATTCCTTCTTTTCATTATGACATCCGTTTAGGTCAATAGGCTTTTTTTTCTCTCGCCCGTGCCTCTCCGTGTTCGATGAATGTGCAGCTTGCCTCCGAGCGGGCGAGCCACCTCGAGCGGGTGACGAAATAGTGGAAAAGAAACGGGGAAGCAAAACTGTGCTGTTCTGGCCCGCAGCGGACGAACGTCATTAAAGGCGCTCCAT…	-	-							-	0.550894	YGR052W	FMP48
Peak_218	7	619762	620148	TGGAGTTAGTATCGTCTGAGTATAAGTACTGATCATCTTCGGGTAGTTTTCTCAAATGTGGGAAGTAGCTCCTCCACGATTTATTCGAAATTGTCATTATCTATTGATTTGTGTCGGTCCTTTTTTGAAAATTGAAACAAATGAAAAGGCGATTGCTCGTGGGTGTAGAGCCTTTATATATAGTTATGTTATAGCCGTAAGAGTCATGCAGATTTTTGGGAATGGCTATCATCAAACTTAGCCTTGCATCTCATATTTCGACTTTTTTTTTCATTTCACACATTTTTTTTTCCTTTCACAGTTGGGTGAAAGAGTCTCGGAGGCGGTACGGCGCTTTCTGTGTAAATCATCCTAAAGTGATTCATAATCTCAGAGCCATTTCGGGTG	-	-							-	5.49771	YGR065C	VHT1
Peak_219	7	625143	625410	GCTTGACTTACATCATTGGCAACACATGCCTGGATCGCTTTAGCGGCTACCTTTAGTCCATATTTTCTTCTATTACCAGATCCCATCATCCCCCTTTGTCCGATTGACGACCATTTTGCCGCGGACGATCGGAGGGGATTGCCAACGCGGGGTAGCCGACTCGGGGCGCCGAGAGCGGGGATCAGTCATCGTCGCAGTAAGCGGGTACGGACCCTGTCACGTAAGACGATGCCGATGCCTGCGCCTGCGCCTGCTCGTATGACGGCAC	-	-							-	1.35127	YGR067C	YGR067C	G-SELEX
Peak_220	7	653901	654222	AATAGTAATACGATATCAGCATGAGCTGCTAAACATTAAGAATTTTTGAATTGTGTTCGCTGGTAAGAGAAAATAGGGTAGCATTAGTTGCGAGATGGAAAATTAAAATATGCGTCATAAGGTATTTTCGACGTTGAAGATTAGGGGTTGCAAGTCCGAGAACTAAACTGCCTTCACGACGTCAAACTTATTGTATGGTGACAATAAAACGAATTCAAGAAGCCAGAGATGATGAGGAACCGATGACGAGGCACATGGGGATAGAACCTCCGTTATCTCCATTCCGCGTTGAGCAGCTCTCCTGCGTGCTTTCACAGAGACC	-	-							-	2.41227	YGR088W	CTT1
Peak_221	7	671979	672249	TCATGCTACCTCTGAACGTTTAAGAGACCTAGCAACTCAGAGGTGATGAATTAAAAGAAAAACCGGGTAAAGTTCTTCGAGAGACCGCGCTGAAAAAATTTTTTTAGAAGAGTCACCCATACAGCCTACTGGTGTTCTCTGTGTGTGCTACCACTGGCTGTCATCGTTGTTGTATGTCCTTCAGATTTATGGAATTACTTAGATGGTATGAATAAGTGGTTAAACACATTATCTAAGACATTCACTTTTCGGCTTTTGAACTGTCATTATA	-	-							-	1.04873	YGR094W	VAS1
Peak_222	7	678147	678395	TCAACCTCGCCTGATCCTACCAAAAAAAAAAATCGCAAAAATAAGCGGGAAAAAATGTCAGATTCTAAGTTTCAAACCTCCGGAGATGATTCATCATCACCATCACCGCCGATTTGTTGGATTGCGTGTTTACGATCCATCATTTTTCTTGTAAGCGTTTAGCTTTCTGTCATCTCTTTATCTTTTTTCCTATTTTTTTTTTTCACTAGTTTTTGCACTGAATAACACCTCCCCTTACTCATAAATGTG	-	-							-	1.83038	YGR097W	ASK10
Peak_223	7	686020	686269	TGAGCACTAGATATAAATTTTTCAAATTTCAGTATAGTACGATGAGATGTTTTTGAATCATTACTGATTAAAACATTTGAGATTTCCAAATTAGCAGTCTTTAACAAAAACGAATGACTCTTAAATAAAACAGAAGCATTGAAAAGGACACTGATAATATTTGACAGTCGTTTAGGCTCTTTATAATCGATACAAATTTCTGATAAAACTCCCAGAAGTTCGGATAATAATGCCGCCGCAGATTCGTCAT	-	-							-	0.634431	YGR098C	ESP1	G-SELEX
Peak_224	7	712211	712532	TATCTCAAAATGAGATATGTCAGTATGACAATACGTCACCCTGAACGTTCATAAAACACATATGAAACAACCTTATAACAAAACGAACAACATGAGACAAAACCCGACCTTCCCTAGCTGAACTACCCAAAGTATAAATGCCTGAACAATTAGTTTAGATCCGAGATTCCGCGCTTCCACCACTTAGTATGATTCATATTTTATATAATATATAAGATAAGTAACATTCCGTGAATTAATCTGATAAACTGTTTTGACAACTGGTTACTTCCCTAAGACTGTTTATATTAGGATTGTCAAGACACTCCGGTATTACTCGAGC	-	-							-	1.5832	YGR110W	YGR110W
Peak_225	7	713605	713966	TAGAACATAAAAGTGAGCTGCAATGAGCACTCAAGCACGTTATTGACAAGGATAACGGAAAGGTACACTAATACTTATACTGATTAATAAGGGTTAGCCTTTTAATGTTCAAGTCAACTTTAAACTCCATAATAAGAAGACCCTTGAAAGGTTTTCAACTTCTTAGAGGGGCTGACTCATCGAATACACGGCCACAGTCCCCTAGAGCCTCCGCAAGAGATGTTACAGAGAAACAGATATTAAGAACTCCGTCAGCACCAACTGCAATACCATTAAGGGAGATTATCTATAGAGTCCCAAGCTTGTTTCCTCGCCCTTTAGAAGATTCTGTTAAGGACTTCCGAGATTTTATCAAGAACGAG	713780	-	CTGACTCAT		CT		RR-YY		5.24463	1.5832	YGR110W	YGR110W
Peak_226	7	730298	730532	TCATGGAGAGATTTACTCAATCTCTTTCCAAGTGAGAGCGCTTCTGTCAATTGTGAATGGTTACGCAGAGAGCCGTAAATCTCATCTAACTTCTTTAGGTATTCCAGGACATCCTTTATAATTTCTTGTGTATTGCTGATGTCATCCTTTATCAAATGATCTAATTGAGTCATAAATTTTTGAAGATCACTTTGTGTTTTCTCTAAATTTATTAGAGTTTCATTTTCTTCATCTG	730466	-	TTGAGTCAT		AA		RR-YY		2.9567	0.952486	YGR120C	COG2	G-SELEX
Peak_227	7	769020	769239	ACTCACTCTTAATAGAAAGGCCTTCGCAGTTGACATTTGCTTCGAGTCATAATCCAGATACACACCCCACTCAAAAACAAGAATCTGAGGGGCCATTACAAATGAGTCAACTTGATACTACACAATTAAATGAATTATTGAAGCAACAGAGTTTCGAATATGTGCAGTTCCAAACACTTTCTAATTTCCAAATTTTATTATCGGTATTCAATAAAATTTT	769125	-	ATGAGTCAA		TT		RR-YY		2.21753	0.928689	YGR141W	VPS62	G-SELEX
Peak_228	7	809689	810085	ATTTTTAGCGTGATTGATAAGGGCGCATTATCTCATCATCCATCGCCAATTTGGGACTCTAACGGCAAACCTCGGATTTCCGTGGAAACGCATGGAAAAATTGATCCGGGCTGTGAGGGGAGTCGAGTCAGTCACTTTTTGGCAACTCTCTCCGTCATGACCACTACTCCGCGGTAGCTGCCAAATTTGGTATTTCCAGGTTGTTTTTTGTGGACAGCCCGCGATCATATGTAAGAGCAGGATGTGTCATCCGCGGGTGAGGTAAACGCTGGCTTGCCATTATGGTTTTTTGGTACGTGTTGAACACGTTGCTTACGATCTTGGTAGGGGCGGGCTGTGATGTGAGAGCCACAAACCCGCTTCCTCGTTGTGGCTCTGGCGCTCCGTTTCTTCTTTC	-	-							-	1.51436	YGR161W-C	YGR161W-C(RTS3)	G-SELEX
Peak_229	7	876259	876596	TCGAAATTCACCCATCTCTCAGAATTATTCACCCAAATCTCAGAAGACTAAAAAAGAAAGAAATGTGGATAATCGAGTCTATAGATTCTTAATTACATATTAAACCTGAGAGGTCAGATTTCCAATAATAGAATAGCCTTGTTGGCGCAATCGGTAGCGCGTATGACTCTTAATCATAAGGTTAGGGGTTCGAGCCCCCTACAGGGCTTTCTTTTTTTCTTTAAAACACGATGACATAAATTTCCTTTGTATGAACCGTACCCTTAATAATAAAAGGAAAAATCATGCTTTAGGTATAAGACTTTCTGTTGTATTAAAATTTAGTATTTATTTTTATT	-	-							-	0.61483	YGR188C	BUB1	G-SELEX
Peak_230	7	880183	880513	GTTGAAGTAGGTGCATTCCGCCTTATTGATCACCCTGTTAGATTTGTTGCGATCGTTATAGTGCTAGTTTGTCCATTGTTGTGTCATAAAAGATAGCTTTGGGAGAAAATTCATCAAAACAACATATCATCAGCGTTATTACAATTCATTGTCCTTCCCAAGTTTTTTTGACGTATAATATTATCGCTATCTGACTCATTAGTACACAAATACAGATATACAACCTCAAAATCAAAAATGCCTAGAAACCCATTGAAAAAGGAATATTGGGCAGATGTAGTTGACGGATTCAAGCCGGCTACTTCTCCAGCCTTCGAGAATGAAAAAGAAT	880377	-	CTGACTCAT		CT		RR-YY		4.64625	1.07899	YGR191W	HIP1	G-SELEX
Peak_231	7	886560	886811	TCTTTGAACTTGGCCACCTCTCTTTCAATCATACCCGTTTTTGGATTGAAGATAACCCTTTTGTTTATGGCTTTTACGCTAGGAACGATCTCCCCCAGAGGAAAATATACACCTAATTCATTTTCACTACTTTCTGAGTCATCTAGCACAGCTTGATTAAAAAGAGTCCAATCGTTAGTCTTCTCATAATTATTTTCCCGTTCTTTGTTTAACTCGTCTCTTATCCTCTCCCTTGCCAAAGAACCATTACAA	886697	-	CTGAGTCAT		AG		RR-YY		3.36736	1.019	YGR193C	PDX1	G-SELEX
Peak_232	7	893992	894301	TTTGCTAAGTCAGAAGAATGGCCGGAACCCTCAGCAAATCGCTGATTACTGTACGAAACCCCGTCCCTGCCGCCAGTAAATGCAGCTGCTGCTGCAAAACTAGGGTCCTCAATGTACTGTGACTCTTCATCACCAACCGATTTAGTCATATTTGTTCTCTGTACGGCTACTTACACTTATGTCAGTACCCGATTCTTACGGCGTATAAAAGATTAAAGAAACAGGATATGTGGCTTGATATATACAAAAAAAAAGAACGATATGGAGTACACTATGTATCTCTCAACAATGCTAAGATATGAAGACGCTT	-	-							-	1.10212	YGR197C	SNG1	G-SELEX
Peak_233	7	905663	905884	CTACCCGATCTGTGGCGTTGACAGGTTTACACAATCGCACGTGATCATATATTTGCCATGACTCCTCCCAGTGACAATTTTGTTCTTTTTTCCTCTTTATCGCTTTCGTACTATGGTCAGTCATTCATTCATTATATACGCGCTCTCCATAACCCGTAACTTTTTATTATATATAGACTCGTTTACAATACAACGATAGCGATACCATTCAATTGAAGTTGT	-	-							-	1.89524	YGR204W	ADE3	G-SELEX
Peak_234	7	950213	950503	TTGCACTGCATTTGGAGGAATAGATTTTTGATCTGGGATATTTGGCAGTTTGAACTTGTTACCATTTAGTCTTTCCATAGATGAAGAAGAGCCAGTAGATGTAACATGGGATAAACCTTGTTGAGATCTTTTGTTTAGGTTCTTTGCGACGTTTCTCCAGGCCTGAGTCATAGCTACAACCTGATCTAGTGTCATTAGTTGGAAGCCATAAAACAAGCCAGAAGTACCGGTCATCGATTCTAAATCTTCTTGGCCATCATGAATTTTGAAAGACGCTTTTACTGGGTTGGG	950379	-	CTGAGTCAT		AG		RR-YY		2.54605	0.652514	YGR229C	SMI1	G-SELEX
Peak_235	7	963743	964062	GTTAGCTTTCGGCCAGAACTGTCGTACTTCATAAGAGTGTTATCATCCAATAGTACTTGTCTCGACGGTTTTGGTCTAACATATCCCATCTTATCGAAGAATTCCATTTCTTCCTTTTTTTCAGGTGAGATTGGGAAGTACTCATTTACAGAGGTTACTGACTCATCACTATCGCTTTCTTCATCATCCGAATCAACCACTTTATGTTTTGTGAAAGGGTTTTCCAAAGTTCTCCTGATTAATGCACTTAGCCATTGCAATCGTTCCTTTTTTCTCACTTCCGTTTTCAAATCATCGCTGTTGTCCTGTTCATCTTTATC	963904	-	CTGACTCAT		CT		RR-YY		2.93324	1.27342	YGR236C	SPG1	G-SELEX
Peak_236	7	991314	991613	AAATGATGGGAACATTGGCATCATCCAGTTAGCGTTATTTTGGTTTGCACTTATTAAGTTGTAACTGTTCACGGGCTTTGTGTTGGTATTAGGGTACTGCAGTGGTATGAAATAATTTTCCCTCGAGACTTGCTGTTGCGATTGGTTCTGAGTCATCAAGGCATTGATAAATTTCTTATTATACTTTGTTGGATAAGCCTTATGATAATCATTATGTGGCTGAAAATTTTGGAACTTTGATGAGTTATCAGTTTGGGATTGATCATCATCATCACTTGAAGATAAATTACCACGTTTCTG	991465	-	CTGAGTCAT		AG		RR-YY		3.67241	1.23782	YGR250C	YGR250C	G-SELEX
Peak_237	7	1025498	1025984	CTTCTCTGTTGACATCTTCACCCAGTTCGGTCAAAATTGTCTTGATAGCGCCTGAAATGCGTTGAATTCGTTCCTTTTCCTCCTCTTCAGTTTCCTCTGCACGTTGTCTTGTACCCACACTTGGCCAAGAAAACCCATCTCTCTCGACAGGAGGGTTTAAAGTGTATGGAGAGGTAGGTCTAATGTTTAACGGGGTTTCATGTCTTTCTATCTCTTGCACTAATTGGATGTTATGCATTTTGGGATGATTGAAAGTATTGGTTCTAACAAAAAATGAGTCACGCACGCACAATCACGATTGAGGATGGAGTCGTATAATATTTTATGAACGGATGCTATATCGATCAGACGGTTGGCACCGTAAAAATAAATGAAAGAAGTTAAAGAAGGGCAAATCAG…	1025775	-	ATGAGTCAC		GT		RY		18.6671	1.92705	YGR267C	FOL2	G-SELEX
Peak_238	7	1051957	1052200	TAAAGTAAAATCAGCATACAAGAGATCAGAAGGGAGAAAGAGAGTGGGCAAGGCTATAGTACTTTGAAGAAAGCATCTTTGAACCGACCAGTTCTCTTCACAAGCAAAATCTATATGACTAACCGCAAGGGGCAAAGGGTTGTGAGAGGGCCCGTCTTTCTCCCGCTATAGCCGTCACTGGTATCCCTCCTGGCTGCACAAATCCGATAGAAAGGGGAAGAAGGAAGTTTAGTGCCACCTTATA	-	-							-	0.566217	YGR280C	PXR1
Peak_239	7	1077875	1078209	AAATGAAGGATTTTTTTAAAGGAATCGCCCTACTTTCTAGAGATCATTCGAGAACTCCCATGCCATGGACGAAAGATAAGCCCAATGCTGGATTTACTGGCCCAGATGTTAAACCTTGGTTTCTCTTGAATGAATCTTTCGAGCAAGGAATCAATGTTGAGCAGGAATCCAGAGATGATGACTCAGTTCTCAATTTTTGGAAAAGGGCCTTGCAAGCCAGAAAGAAATATAAGGAACTTATGATTTATGGTTACGATTTCCAATTCATTGATTTAGACAGTGACCAGATCTTTAGCTTCACTAAAGAGTACGAAGACAAGACGCTGTTTGCTGCT	1078056	-	ATGACTCAG		AG		RR-YY		3.86014	0.913076	YGR292W	MAL12	G-SELEX
Peak_240	8	11460	11739	CGCAAGCGTGGGTGATTTTATTATTAAACAATTTTTCTGTCTCTATACGCATATATGTTCTATAACATAAATATGTAATGGATACTAACCTTTTTCTGTGATTAACTTACTCTTTGCGTTACACCTCCATCTGACTCATAAAACAGGAAGACTCAGATTTATTAACTTTAGCATTTACGCCGCAAATGGTAAATGCTCCGGCCCGATACCCTGAAATAGCAACATGTACGAAAGAAGGTATTCAACTGAAGCCTTTTAGACAGACAAGACTATTGGATTA	11594	-	CTGACTCAT		CT		RR-YY		3.93054	1.02132	YHL046C	PAU13	G-SELEX
Peak_241	8	46060	46281	AGATATGGGCACTCGAATTGGAACTGGATTGTAATGACGCCATTGTAGAAGTAGTCGGTGAAGAAGGCAAACTGGTTATGCTAGATTCTGTATTCTCGTATAACTTCCTATAGGAAGAGTCATCAAATTTTGTTAGCAGAGGAACGTTATTAAGAAACTCAGAAATTTCCGCTTCTTCAAATTCTAATAGCTTAAATTCGTTAAACTGCAAAATCGCGATGA	-	-							-	1.04444	YHL029C	OCA5
Peak_242	8	47661	48060	TCGGTTGGAGCCTTACTTTTCAGAAAAGGGTCATTAAGTATGAAATCATTGGTTATTGGGTCCCAAGAAATGGTATTGGAGGTAATGTTTGGTGAAATGCACATTGGGTGGTACTTCAGCAGGATCGGCCACACGACGTGTCGCAACTGTGGTGGAACCCCGTATGTTCTTGCTAAAAAGGCCAATGAGTCATGGTCATTGCACTTTACTAGATGGATAGTCGTTTCGATAAGGTTCTTGTTGCGAAACTGCTGTTTTAGATTTTTCAAGTAGTGGGAATTCGCCATGGGCGACTTCTTGTCGTGCATATTTGCTAGCGAGCCCTTTACCCTGTAACGTCTCTAAGAAATTTCGAATAGTGATCTACAGGTACGTCTGAGCTATTATCAATTTCTACCAG	47849	-	ATGAGTCAT		AT		RY		7.97841	1.04444	YHL029C	OCA5	G-SELEX
Peak_243	8	50812	51136	AATAGCCGTCCAGCTCGGAGTTTCTAAAATTACGTCCGAGATGACGGAGGCTTATAAAATCATTTCAGACGGGTGAGGGATGCCAATCTACGAGACAAAAGATAAAAAATTAAGACTCAATAATATAGAAAGGAACTAAATGTTTTCATAAGAGTCACCGTCTATAACCTTTTTTTTTTTTATTGGTCTGTTATCACTTCCACTGAGAAAGTAATATTGCTATTGCACAACACTTTTTGAACAAGTGCAAAGATAAAATACTGAAAACGGTAAAGTAGGTTTGTTTAAATTGACTTAAGATGGTGCCATTGGAAGATCTGCTTAA	-	-							-	1.78806	YHL027W	RIM101
Peak_244	8	103580	103984	TATTGGAGATATGTACGGATCTGTAACGCCTTTGAGACCTCAAGTTACGAGAATGTTAGGTAAATATGCTAAAGAAAAAGAAGACATGTTATCCCTGCGTCAAGTCTTAGCAAATGCAGAACGCTCATATAATCAACTAATGGATCGTGCAGCTAACGCACATATCTCACCACCAGTTCCAGGCCCTGCACTCTACGCAGGAATGACTCATGCTAATAATACTCCAGTAATGCCACCTCAGAGGCAGAGTTACCAAAGCAATGAGTACTCACCTTACCCTTCTAATTTGCCAATCCAACATCCTACGAATAGCGCAAATAATACCCCACAATACGGTTATGATCTTGGATATTCAGTTGTTAGCCAACCACCACCTGGTTATGAACAATAGCCCTTCAA…	103786	-	ATGACTCAT		AT		RY		13.6689	1.01719	YHL001W	RPL14B	G-SELEX
Peak_245	8	118127	118683	CAATTAAAATTGATAATAATGGTGCAGTCACTACACAGTTGAACTTGGACGAACCGATTTTACGGGGCCCTAGCCGCGGCGAGCCAGCAAAGTTACAGAATGACTTGATAAGTTCTCCCCCGCTAGAGGAATCCTATATCAATAATGACCAGTACAAAGCTCTTTTCCCCTCTAATTTCCTTCCAATCACGCCCGTAAGTAGCGTAATCACTCCTGCATCGAAGAAAAGTATTGATGAATCTCCCCTATCCGATGAGGTTCAAGGAATTGCTGATGAGTCATCCGAAACTTTACCATATATATGTCACTATTGCGATGCTAGGTTCCGAATCAGAGGTTACTTAACACGACACATAAAAAAGCATGCGAAAAGGAAGGCCTATCACTGTCCATTTTTTG…	118404	-	ATGAGTCAT		AT		RY		28.0535	1.51805	YHR006W	STP2	G-SELEX
Peak_246	8	136282	136556	CAGGAGAATGCAGAAATACTTGAGTCCTTAAAAAAAATTATAAACAGAAATTTACAACGTATAAGTATTTCTGGTTTAAATAAAGAAGAAAATCTGCGCAGCATTTCCGAGTTTATTTTTGACGTATTTTGGGAGCATGACTCAGAAAGGCTATCGCACTTTTTATTAATGACAAATACTTCATTAGAATCACAGAAAATTCTACAAAAACAAGTCACTAGAGCTGCTGAAAGCCTCGGATTTACAGTTTGATTCCTTTTAAAGGAAGAAGGCAG	136422	-	ATGACTCAG		AG		RR-YY		4.72838	2.56367	YHR015W	MIP6	G-SELEX
Peak_247	8	139138	139446	CACGAAGAAGATCAGGATTTCATATATTACATTGATCCCACCTGCGAAAAAGACTTCGAGGGTTTTTTTGTTGATGTACCAAGGCTAGCATCCATATTGTTTATGCCAAGGTTATCATATCATCCATCCGGAGTAATTTCATGTGACTCATTGGAATCTGAAATTCATTCAAGTATATTTGTGTATTATCAAGCATTATTAAGCATTATACCCCATTTGAAGAGAAAAACCCAACTAATTATGTTCAATCCATCTTTGACTGCGGACCTGAACTTAGTCCATCATAGTACAGAAATTATAACGTCTGGA	139284	-	GTGACTCAT		GT		RY		9.50369	6.70073	YHR017W	YSC83	G-SELEX
Peak_248	8	141216	141813	TCTTTGCCAATTCTGTCTCCGTTAGAAGACCCAACTTCTGCAAGCCCGCTGTGTATACTTTAGTTCCTTCTAAATCTGCCTTATACATCTTATAATCATACGGAAGAGACGCATTGTAAAGGTGCATCAAAGGATCGGTTTCACCAGTGAATCTCCCACCCCATAGTTTTTGAGTGCCGTCTGACATGTTTGCCTTAGTCTTGTTATATAGTTACCTGCTTTTGAGCTCTTCAATTGCGAATATTCTCCCCTAGCTAAAGAAAGGTAGTCTTATCTCAGAGTTCTGTGCTTCGCTGACCTTTTATAATCCTTTTTTTTTTTTTTCACATGTTTCAATTTGCGCCAGCTTATCCAAAAAGTGAGTCATTCATCTACTAATCATGATTTTCGGGATTCTGC…	141578	-	GTGAGTCAT		AC		RY		50.1584	15.1162	YHR018C	ARG4	G-SELEX
Peak_249	8	146167	146637	AATGTACCTTACCATGTTGACAGCTTATACATTAACAGACCTTTATAGTACTGTTATGGTAATAACAAAAAAGATTGGACGAGTCCGGAATCGAACCGGAGACCTCTCCCATGCTAAGGGAGCGCGCTACCGACTACGCCACACGCCCTGATATTTGTTGAATGTGTTGTATTACGGGCTCGAGTAATACCGGAGTGTCTTGACAATCCTAATCTGAACAGTCTTAGGGAAGTAACCAGTTGTCAAAACGGTTTATCAGATTAATTCACGGAATGTTACTTATCTTATATATTATATAAAATATGAATCATACTAAGTGGTGGAAGCGCGGAATCTCGGATCTAAACTAATTGTTCAGGCATTTATACTTTTGGGTAGTTCAGCTAGGGAAGGACGGGT…	-	-							-	0.996015	YHR021C	RPS27B	G-SELEX
Peak_250	8	153090	153580	CTTTGAACAATTATGCATCAACTATACAAATGAAAAATTACAGCAGTTCTTTAATAACCATATGTTTGTTTTAGAACAGAGCGAATATTTAAAGGAAAACATTCAATGGGATTATATAGATTACGGAAAAGATTTGCAACTGACGATTGATTTGATCGAAAGCAAGGGGCCACCGACCGGTGTACTACCGTTGTTGGATGAGGAAGCCGTTTTGCCCAAATCCACTGATGAGTCATTCTACTCTAAACTGATCTCAACTTGGGACCAAAACTCTTCAAAGTTTAAACGTTCAAGATTAAAAAATGGGTTCATTTTGAAACACTATGCTGGGGATGTGGAATACACTGTGGAAGGCTGGTTATCCAAAAACAAAGATCCTTTAAACGATAATCTCTTGTC…	153321	-	ATGAGTCAT		AT		RY		16.0741	1.30673	YHR023W	MYO1	G-SELEX
Peak_251	8	156172	156400	ATTCATGCACTAAAACAAGCTGAAGAGGACGTAAAGAATATGGCGTCTATCATTGAAAAATTGAAAACTCAAAATAAGCAAAAGGAAAAGTTAATCTGGGAGCGCGAAATGGAAAGAAATGACTCAGATATGCAATTACAGGAAACTCTGCTGGAGTTGAAGAGAGTCCAAGATGTAAAGAAAATCCTGAGTGATGATTTGGCCCATTTAAAGGAGCGATTGAGCGCTG	156294	-	ATGACTCAG		AG		RR-YY		3.12096	1.59419	YHR024C	MAS2
Peak_252	8	166818	167328	TCTTGGACGTATGCAATATCATTAGAATTAGGGGACCATATTGCTAGAGCCACCTCGTTTCCAATCTCCTCAAAGGACGAGCTACTCTTATCGTAGACAAAATAAGAACCAAACGTTGAGTGTCTCCAATTTTGTACGCTATTTGTTCTAATTAATAACCGCTTCAGGTCGGGAGACGCAGTTATTGACTCCACAGTGAGGTTTTGACCGTTATGAATGAAAGTTTTTCCCTCTAATAAAACGCTATTATATGAGTCATCGTAGACAGATTTAACAACGTAACTATCGTTCATAAATGTAACATAAAGACCTAGATCGTTGCTTTCAATTTTATTGTCACTAATCCATTGCAGCTCGTGATATTTGGGTTGAAATGTATTGTTTCTTACAACAGAAAAC…	167072	-	ATGAGTCAT		AT		RY		28.1004	1.17572	YHR028C	DAP2	G-SELEX
Peak_253	8	168499	168779	ATTTCCCATAAAGGGCTTCTCAGTGAATACATCAACTTGTTTGAAAGGTACCATTAAAGTCATATTCTAAGCGCTTGGTTTTTTTTATCTTATCTTCCTTGTGTCATATTTAGACATTTAGTTTAGTATTCTAGGTGCTTAAATAATGAATATTGTCTATAGATGACTAATCATAAATGAACGAAAAGAAAGAATTCAAGAGGCGATAACAAACTTCCGCGGAGTACGATTAAGATAAGCGTCGGAGGAGGAATTTGATATACGAGCTACAACAAGAGCAC	-	-							-	3.79615	YHR029C	YHI9	G-SELEX
Peak_254	8	200639	200973	TTTTTCGTCCCCTGGGGTAGAATAAACTCTTACTGGAATACGGAAATTATTGCTTTCCACGTATCTCAGGTCAGCTACAATAAATGCTACTAAGTACGTAGACATCTTTGGAGTCGTGTTAAAAGTTGTATATTTCTTACCCTCTTTGATTGTTTCATTCCTGACATCCATGTTGGACAAATGAGTCAGAAACGATTCAGAGACCAAAGTTACTGCAAAAGTCGCCTTCAAATTTGGTTCGTCAAAACAAGGAAAGGCTCTTCTAGCATCTGTGGCTTCCATCTGAGTAGTAGCCATGTACTTCGTCTCCCCTGTGACTTTATCCGTATACTTAG	200823	-	ATGAGTCAG		CT		RR-YY		3.1679	2.42057	YHR047C	AAP1	G-SELEX
Peak_255	8	225320	225648	CCAATCTATAAAAAAAAGAAATCGGAAACATGAAATATGAATTTGAATAGAACGTGACTCAACAGAAAGTCACAAACCTAACCATAATAACCTTGCTATAGCATTTTTTGACTTAATTTTATATGTTCTTTTTTCAAGGGCTGTATAGTTCCATCATGTATGTATTTTTCTATATACGTATACATACCGTTTTTCTTAGAGCGCTCTATAATTCACCCTTTACAGCATTACCAGTTTTCAAATCTCTAGCGGTGACTCTTAAAGCACCGTCTTTGTTAATGTTAAAGATAATTTCAACACCGTTAGCGTTTTTAATTCCCAATTCCATC	225377	-	GTGACTCAA		GA		RR-YY		2.37006	0.980008	YHR063C	PAN5
Peak_256	8	236280	236815	ACGATCTTCCGTTGAATGCCGTTTCGTTGCATTTGGTGCGCAAAGTTGCACCCACCAAACCGATGTATTGCGCGAGTTTCCAACTTCCAGCTAACGTATGAAGCGATCTGCTCTTGCAGTTTGCCGTGGGAGGAAAAAGGCAAAAAGGCGACCATTAGAAAAAGAAACGAGATGACTAACACCTTTATCTTCGAGAAGGCGCGGGGCTGACAGGGCACTGCGCGATGCGTCATACTACTTGAATACAACACAACCCGTCTTCTGTTATATAAAGAAGAAGAATAAATTAGGAAGTAGGGGGAAAAGGCTTATAGTGTAAAAGTATTTTAGTTTGTTGTTGTAATTTCGTCTTTTCTCTCACTACCGTAACAACGTGGTAGTTGGCAGAATATATATATT…	-	-							-	9.02744	YHR071W	PCL5	G-SELEX
Peak_257	8	299208	299432	ATCGTCTTTTTGAAGTTTTTCTTGAATTTTTTTATGCATTATCACCAAGTAATTGTCATATGATTCGATTCTGTTGACGGTCTTGTCCTCGCAAAGCAATTGACTCATCACATTACTGTAATATTGATCAACATTAGGCCTCAACAAGACTAACGGCAATGATGACTTGTTGACTACTTGTTGCCAGTTTTTAATGACGTTTGAAGCCTTTTGATTAATACTAGT	299311	-	TTGACTCAT		TT		RR-YY		2.56952	1.80778	YHR097C	YHR097C	G-SELEX
Peak_258	8	303795	304314	GGAACTTTTGCATGCCACTAGACACATTCTATCTACAAACTACAAAAAGCTCTTTTTACCCAAATTGGACTATCTGTTTGACGAACGTATACTTATTGGTAACGGTTTTACTATGCATGAAACATTAAGGCCCCTGGCTTATAGTACTGTGGCAGATTTCATTCATAATATAAGATCTGAATTACAACTAAGTGAAATTGAAAAAACAATAAAGATTTACACTGGATATCTATTGGATGAGTCATTAGCCTTAACTGTACAAATCATGAGTGCAAAATTGCTGCTTAATTTAGTTGAAAGAATATTAAAATTGGGAAAGGAGAACCCACAAGAGGCCCCTAGAGCAAAGAAATTGTTAATGATAATCATTGACTCATATATGAATAGATTTAAAACCTT…	304035	304167	ATGAGTCAT	TTGACTCAT	AT	TT	RY	RR-YY	16.2501	0.789309	YHR099W	TRA1	G-SELEX
Peak_259	8	353434	353669	AACTATAATATTCCACCACTCTCTTCTCAGTCGCAATGCTTGGGTGTACGGTGTTTGAATAATTGAATTAGATTTAAATGCGAATAAGTGATGACTAACAAGCAAAAAAATCGAGTATTTCAAGATCCAGTCGAATATAAAATCTTGCTACTGCATTATTCTACGATTTCCTGTTATCACTTATAGTACACATGTCTGAGTTTTTGAATGAAAATCCCGACATTTTAGAGGAGAAC	-	-							-	1.59767	YHR122W	YHR122W	G-SELEX
Peak_260	8	386049	386391	ATCCTCATCATTTTCAACATCATCATCATCTGCCCCTCTTTCCTTAACTTCTTCTTCTTCTTCTTCTTCTTCTTTCGCCACTATTATTACCTTGGCACCATCGAGCTCAAAAAGCGGAAACTCTCAACTAACTTTGGCGTCATCGTCTTCCACTTCCGCAGTTGAGTCATCCCAAACAGGGTCCACTATAGCAAGAACTACCTCTACACTGGTACCCTCTTCTAGCGTAGATACAACGTCTAGAGCAACGACATCCATGCCATTAGAATCGTCTTCTACGCAATCGATATCCGTCTCCAGCTCGGATGGCACTTGTTACGTTTTTTATGATGATGATGACTAC	386214	-	TTGAGTCAT		AA		RR-YY		3.33216	1.481	YHR143W	DSE2	G-SELEX
Peak_261	8	391138	391439	CGATTGTTGAGACCAAGGAAGTGGCTCATAATGTGCAGGAACTTACTCCTCAAGTGGAAGCGGTTACTCCGTTAATAAATGAGCCCGAACCATTACCAACTCCGGAAGCACAAATATCTATACCTGAGTCATCGAAAGTTGAACCAGTGGAGGGGTCTCTTCAATCTAAGTTGGTGGAGAAACGTGAGTCCACTGAAGGTGTATTAGACGGTTCCAAAAAAGTAGAAAATAAGGCAAAAAAAGATGAAGAGGTCTTTACATTAGACCCCATCGTTAACAAAGCTCCCAAGCTACCCTTGACT	391265	-	CTGAGTCAT		AG		RR-YY		2.9215	0.816576	YHR146W	CRP1	G-SELEX
Peak_262	8	422505	422950	AGCCTGAATACCAAGTATCGAACTGAGGCCCCTGTGTTACCAATCCGTAAAAAGTGATGGAACCCGCCGCTCGCTTCCAAGAGTTATCATCATATTCTTCATCATATTCTTCCATACTTAAGGTGGGTAGCGAGGACCCCTCAATTCCCCCACCTCTCTGCCAGGGCGTCATCTTTTTCTACAAAAGCCAGGCTGAGTCACGTCAGTTGCTGACCCTGGGGGCTGCATTGTTTCCTACGAATTACTCATTTGTTTCGTGCGCTTTCCTATTGCGCGCATGACTAGGATGGAAAAAAAAAGAAGAAAAAGAAAAGCGTTGAGTATATAATAAGAAAGAAGAAAAAGTCCGAGAGAAAAGAAGCACAAAGGTTTTTCCTCGAGGAAAACAGTAAAGTTTGA…	422701	-	CTGAGTCAC		GG		RR-YY		25.5778	4.55549	YHR162W	MPC2	G-SELEX
Peak_263	8	431582	431996	ATTACCATAGGCATCATACATGTTATAAGCCAAATCGATACCGATCATAACACCTGTTGGGGAGGGATACATGCTGACATTATCTGTTGTATAATCGAGGAATTTTGCCCTCACATAACGAGATATATCATGAGAATCATAATCACCGTATCTCAATTGTACATCAAACCACATTTTGTTGGTAATCAATCCCTTAAATGAGTCATTTGTTTCATGTAATAGGGAGGGTTTTGAAACTTCCCATTCATGAACACTTTCCATAGTTATGTCAGCGGCAGATGAATTCATCTTGTACGATTTGCGGGGATGCACTGTTTCTTTAGTCACAGATTCAATTTGCAAAACATCTAGCTCACCATCGAGAATTTGACAAATATCAAAAACTATACTTTCATGTAT…	431783	-	ATGAGTCAT		AT		RY		11.3575	0.998623	YHR164C	DNA2	G-SELEX
Peak_264	8	433440	433874	ATATATATACGATCTAAATATCTGGTGTAAAGTCTGATCGGATGTGCCTTTTCTACTTCTTTGCTCTTGAATTGCATAAATTCATTTGGATTGTTAGCTGGACCAGCCAAATCTGTAGCCCTTTCCTGACCCAATAGTAAAAGATCTATAACTAGTCCGTAATATTGGAATATGAAAGAAGCGAACTTCAACCCGCGTATTAAGCCATATTTGTTGACGTGACTCATATCTTTAAAGTTGATAACAACATTATTTTTTGCAGTGATATAGTCAGCAATATTAGGATCTACAATCAGGCGAAGTAATCTATTAAGTAAAGTAAAGTCAATTTTTTCGGCCATTTCACCCAAAGTAGTCTCAAGCAAAACTGCAGATTGGCCTCTGGATACATCCCAAATT…	433662	-	GTGACTCAT		GT		RY		13.6924	0.9788	YHR165C	PRP8	G-SELEX
Peak_265	8	438288	438730	ACTCCAGCCAGCAGGACCAGTTAAAGGAGTAGCAACTCAGAGATTTCAAGAATGACGACATTGCCTTAGAAATATTCTTCTCTTGCTTTAAGATGACCCCTCGTAAATAATACAACAGTGCTAACCCTAAATCGGCCTCATCATCGTCTATCTTTATTTCATAAGACTCCAGAAATGTGTTAATTTCCTTCAAAATAGATGATATGTTCGATTGTGACTCATGCTCATTGCTGACCATTTTTAAATTGGCGCGTTGGTGCCCACTTTGATTTATATCCTCATTCCCACTACCATCCCCATCTTTGTTAGCTCTGTACATTTCGTCCGTAAACTTCCCTGTAGTTAAGATATTTTCCATACTTTCCTGGCTTTTCTTATCCCACGATAGAAATTTACTGT…	438505	-	GTGACTCAT		GT		RY		12.2492	1.11051	YHR166C	CDC23	G-SELEX
Peak_266	8	449208	449435	TTAAACGACCCTTACCAAGAATTCATGACTTATGATGATTTGGAAGGTAAGACGGATAACATATTTGACACAAGAGACAGAGCGTGGGATACGCAATACTTCATAAGAAAAGATGTTTTGTTGCGGGATTGTGACTCAGAAGAGGATAAGAATCTACTATTCAAGATGTTAAGGACCGGTATTTTACTCAAAGTTGTTCGAGCTAGCTTACAAATACCCACCATACCT	449342	-	GTGACTCAG		GG		RR-YY		2.85111	0.616364	YHR172W	SPC97	G-SELEX
Peak_267	8	491862	492300	ACATATTAGTACTCCGTTGCAATATATAACGCCGGGCATTCTCCACGTATATACATACCGTAGTGCACAATGGGCTCCTCTTTGGATTTGGTGGCGAGCTTCTCGCATGATTCCACTCGTTTTGCATTCCAAGCAAGCGTCGCACAAAAGAACAATGTGGATATTTATCCATTAAATGAAACTAAGGATTATGTGGTCAATAGTTCATTAGTGAGTCATATTGACTATGAGACAAACGATATGAAGGTTTCAGATGTAATCTTCTTTGGGTGGTGTAGTGATTTGATAGATACGCAGTCATCCAATATCAAAAGAAAATTAGATGAAGATGAAGGAACTGGTGAATCAAGTGAGCAAAGATGTGAAAACTTTTTCGTTAACGGATTTCCTGACGGAAGA…	492076	-	GTGAGTCAT		AC		RY		12.1084	0.72053	YHR196W	UTP9	G-SELEX
Peak_268	8	517209	517535	AAGTACCGCGTGTACGGTTGATTGAATGATCTTACTGATAGAGGCCAGGCGGTTGATACTTTGTGCAGATTTCATACCGGCTGTCGCTATTATTACTGATGAATTGGCTCTCTTTTTGTTTAATGGCCCATCCGATCCATATTGCCTTCTTATGACTCAAAATTCTATTGTGTTTGCCGGTACCGGCCTTTAAGCTTTGAAAAAAAAAAAGCATCTGAAAAAAATGGCACTATAAAGAGAGCTAGTGGTAACAACTACATGTTTTCGTTAGAATAAATCACCCTATAAACGCAAAATCAGCTAGAACCTTAGCATACTAAAACATGT	517364	-	ATGACTCAA		AA		RR-YY		4.43505	0.941671	YHR208W	BAT1
Peak_269	8	532991	533440	GGTGCAATTCCTTGTGGTTATTTCCTTTTAGGTTATATTGCCAACCACATCATAGTACTATTTGCGGTCACTTCAGAAGATATGTTTGCTCCTTTGATCATGATATAGACCAGGCCAACTGTACCGCTTCAGGCTTCAAAGCATTAGGAATAAGCACCACTATTACACAACCATAGAGCTACTCTTACTGTCACGTAGGTAAAACACTTGCTACTACACACACTCGTAGTGACTCATCTGACTATATTGCCGGTTGTTAAGAGGCACCAGTTAAGCACGCCATCAAGGGTACCGAATAATCTCTTCTGTATCAAGTATTCTACCTTTATGTCTGACCCACGTATTATGTGGAGCAATTACGTATTTTTCTCATATCAGCTTTGTTTTTACTCAACTTTG…	533223	-	GTGACTCAT		GT		RY		16.4261	0.935847	YHR212W-A	YHR212W-A	G-SELEX
Peak_270	8	534272	534541	AAAATAGTCAATAAAAAACGCCCAGAAATGGCTGTAAATTAGTGTTTGTAGTACACAAAATAATTTCCTAATTCCTTCCAAATGGGGTTTTCAAAAAGCTGACTCACGTAATTGATCAATACTTCACTAAAGAAGAATCATATGAATAAAACTAAAATCAACACTAACTGAGAGACTTAGCGGCCAAAGCTTAATCATCATTACATAGAGTATATGAAGGGAGTAAGTGAATATGCAAGGGTGGGAAACGGCAAAGCATTTTTATGCAAA	534374	-	CTGACTCAC		CC		RR-YY		3.80148	0.935847	YHR212W-A	YHR212W-A
Peak_271	8	541608	541857	TCTTTTTATTGGTAAACTCTCGCCCATTACAAAAAAAAAAGAGATGTTCAATCGTTTTAACAAATTCCAAGCTGCTGTCGCTTTGGCCCTACTCTCTCGCGGCGCTCTCGGTGACTCTTACACCAATAGCACCTCCTCCGCAGACTTGAGTTCTATCACTTCCGTCTCGTCAGCTAGTGCAAGTGCCACCGCTTCCGACTCACTTTCTTCCAGTGACGGTACCGTTTATTTGCCATCCACAACAATTAGC	-	-							-	0.785759	YHR214W	YHR214W	G-SELEX
Peak_272	9	10113	10547	CAGCCAACACAGATTCCTTTGAGAACAAATGGCTACCAAAGTTTCATTCAAATAAGCCTGACAATCAACCCCATCAAAGAGGAGCTCTTTGTTTTTCCAAACCCATGAGAAAAAAATACAGTTCCTTTTCCATACCAAAAAATGAAGAAGAAATCATGTGCTGAGAGTTGCCTGCAGTCGTAGAAGTTTACGATCCTAACCCATTATGTGATTCGTTGTGAGTCACCCTTCCATGATTATGTGTCCTTACTACCTACTATCCAATTACTACATATGTTTTGAACTCATATGTACCAAGCACCTAAAATTACGCACCCATTTCCATTGGCAAAGACTTGACGAAATTTAATACACTGCAATAATATCCAGCGATACTCTTCAAGAATTCCCGCCTATAAT…	10334	-	GTGAGTCAC		GC		RY		14.4902	0.950892	YIL173W	VTH1	G-SELEX
Peak_273	9	34482	35013	CCCTTCCTTCTTGAAGACGGTAGCCTAGATAAACCCCAAAGTTCGATCCCTTTGGATAACCACCAAGAGTGGCTTCTGGGATAACGACCAACTTGGCACCAGATTCCTTGATCTCCTTCTCATATGACAAAATTTTTTTCAAGGTATCCTTAGTAGAGCCCGGACAAGAGCCGATTTGAAGGGCAGCAACAATGTGTTTCGCCATTGTGGTTAACTAGAGGTAGCCTCGAAAAGTGATTGGCTAACCCTAAGTCATAATATCACCCTTTCTTATTGAAGAGCTTTTATTATTTATATACACTGCCCTTTATGAGTCACGGAGGCCTGGGCTCCATTTTTTTTACGAAGCAAAAAAGATAGCTCATATTTCGTAAGCATTAGGCCAACTTTACTGATAAC…	34795	-	ATGAGTCAC		GT		RY		16.7312	3.75452	YIL164C	NIT1	G-SELEX
Peak_274	9	56341	56759	AACCAGACTTCTTTTTCAAGAGATAGACTACGTAGATAATATTAATTAAACATATAAATGTGTATGACAAGCATTATGACTTCTATTTTCGTTCTTTTTTACTTGCGTCTACAATATATAAGCATATAATCAGATGAAAAAAGGAAAAGGAAGCGGTAATACAAATAAACAAAGAAGTGGAAAAAGTCGCCACAGTGTAAGCAAATGAGTCACAAGAGAAGGGGCCTGGTAATATATCAGGATCAGAAGCAGCAACAACAACACCCCCCGGGGCAGTCCCTAAGCTCTATATCCTGGTCTCCAACCAGGCGACCTCATCACCCTTTAAAACAACAAAGCACCAACAGTTTCTCAGAAATACTATCGAAATCAAGTGTGCAACCGAACGTGCAACATGAC…	56549	-	ATGAGTCAC		GT		RY		10.4541	1.96483	YIL152W	YIL152W	G-SELEX
Peak_275	9	86004	86227	GGCGATTGCTCCAGAAACAAGCTACAGTTTTGTCATCATCGCTACAGACATTGAAGGATTTTCTGCCGTTGAGGTAGAATTCGAATTAGTCATCGGGGCTCACCAGTTAACTACCTCTATTCAAAATAGTTTGATAATCAACGTTACTGACACAGGTAACGTTTCATATGACTTACCTCTAAACTATGTTTATCTCGATGACGATCCTATTTCTTCTGATAAAT	-	-							-	0.971698	YIL140W	AXL2	G-SELEX
Peak_276	9	138223	138470	AACGAAGTAAGGAACAAGCACAATGGTACGCCCGGTCTTGAAAAAGTTTAAAACAGTACTCGACCCTAGGCGCTAGGGTGGGTGACGCATTTTAACTTTGCAACAGAATGCCATATGCGGTGTTAACCTCACAAGATCGGCTCTACTATCTGCAAGCTGCGGCAAATACCAGAGAAAATTCCATTCCCGTCGACAAAATTTAACCGACCCCCCCCCCCCCCAATTTACGTTTATCAGCTAATCCAAAT	-	-							-	0.98318	YIL119C	RPI1
Peak_277	9	142381	143113	TTTTTCTGCCGCATTCCAAAGGTCATAACTTTGCAAAAATAAAGGGTAAATGGTTAAAAATTGTTATCATAAATAAGGTGACCGGTTATATTGAGACCTTTCCTGGACAGTAACTAATACAGAAGCCATTGGTAATGCAATAATTTATTTGATCATGTGACTACGATCCGGGTGAGACTATTCAAAAAAGGAGTCAAGCATTGAAATAATTAATGACTAATCCGAAGTTAATTGTTAGGAGTCAATTGTTTTTTCCAATGAATGGAATCTGAGATGACTAAACTACCAATTTTCAATAGTTCATGGTATAGTGACGTAGTTAGTGCTTTTTTTTCTTGGATCTGTTGACTCACTTCAATTGATGTTTCTTACCCTGACATGACATACTTGATATTTTAT…	142729	-	TTGACTCAC		TC		RR-YY		13.3169	10.1126	YIL116W	HIS5	G-SELEX
Peak_278	9	152977	153245	GAGTATAGCCGCTAAAAAATGGACTAACAGAGCAGGAATTCATAATGACAAATCTAAAAATGGCAATAATGCTCACACAATAGATCAGCCACCTTTTGATAATACCACAAAAGCCAAAAACGAAAAGGCCGCTGACTCACCTTCAATGGCTTCCAATATTGATGAGAAAGCTCCGGAAGAGGAATTCTATTGGACAGATGTTACTTCTAGAGCGGGAAAAGAAAAACTGTTTAAAGCTTCGAAGGAGGGACATTTACCATACGTTGGTA	153112	-	CTGACTCAC		CC		RR-YY		3.17963	1.73685	YIL112W	HOS4	G-SELEX
Peak_279	9	184150	184404	GAAGTGGATGCTATGAAACTCCTTAGAAATAATAAGCATGTTGTTTCTTACATAGATTCACATGCTGCAAGGTCTGTAAATGGTATAGCATATGAGGTGTTTGTGTTAATGGAATTTTGTGAACGTGGAGGTCTTATAGATTTTATGAACACCAGATTACAAAATAGATTACAAGAATCTGAAATATTAGAAATTATGAGTCAAACCGTCCAAGGTATAACTGCAATGCACGCTCTGCAGCCGCCATTGATTCAT	184349	-	ATGAGTCAA		TT		RR-YY		2.35832	1.44427	YIL095W	PRK1	G-SELEX
Peak_280	9	186827	187237	AATATATCCCCGTATAGGTTTGGTGCCACTATCACATCAAAACATTGTGGTTCTCTGAACAGCCTATAAACCATGGAATCCACAATTTGTTCGTTATATTTGATTTGACCGTACTTGTCCTTGTTAGATTCGTAGACTTCCTTACAGATTTCTCTGAATAGACCATCACTTTGAGATAGAACATTTGATTTATGAGTCACTGTCAAAGTGGCTTGGCCTCTTGTTTGTAATCTTTTCAAGGCAATATCTAATGCAATGGTTGCAATTCTTCTTGTTGCAATTTCGGATATTCTCTTTGTGGCATCAGCAACTCTTGTACCTGTGGCCTTGTCAATGTATGTTTTTTCAATTTTAATGTACAGGTCCTCAGTATTTTCTCTGACGATAACCATGTCAATT…	187022	-	ATGAGTCAC		GT		RY		11.381	2.23683	YIL094C	LYS12	G-SELEX
Peak_281	9	189068	189501	GGTGCAAATGAGATCCAAAAACATGGCATACGAGTCGGGAACTAATAACTATAGTGATACAATAGCTAATGGAAATACCCTGCCGCCGCGAAGCAAGAAGGGACACAGTGGACGTAGAAAGAGGAGCGAAACTTTGCCCATAGCGTGTAATAATTTTTGTGTTACAAGACAGATTGATGACGATGAACAAGCGTTCAAAATGCTAGATAAAGTGAGTCATCTGAAAAAATTCAGTGCTGAAGACGGTGATGATAACAATATATTCGTCCAATGGGCCGATGATATTACAGATATCTTATTTGGACTATGCTGTACAGGAACGTTTTTGAAACTTCTTATAAGCTCTGCATTATCCGGCCGGGCTAAGACATGGTTTGATTCTACAACGGAGGGAATCGA…	189283	-	GTGAGTCAT		AC		RY		14.6075	1.09971	YIL092W	YIL092W	G-SELEX
Peak_282	9	205233	205627	AATGAGATATGTCAGTATGACAATACGTCACCCTGAACGTTCATAAAACACATATGAAACAACCTTATAACAAAACGAACAACATGAGACAAAACCCGACCTTCCCTAGCTGAACTACCCAAAGTATAAATGCCTGAACAATTAGTTTAGATCCGAGATTCCGCGCTTCCACCACTTAGTATGATTCATATTTTATATAATATATAAGATAAGTAACATTCCGTGAATTAATCTGATAAACTGTTTTGACAACTGGTTACTTCCCTAAGACTGTTTATATTAGGATTGTCAAGACACTCCGGTATTACTCGAGCCCGTAATACAACACCTGGTAGCGTTAAAGGTTACTAATTGTTCAAACGAACCATCGAAAAGCCGAACCTAGCTACACCACA	-	-							-	0.902994	YIL083C	YIL083C
Peak_283	9	210327	210773	ATATGTCAGTATGACAATACGTCACCCTGAACGTTCATAAAACACATATGAAACAACCTTATAACAAAACGAACAACATGAGACAAAACCCGACCTTCCCTAGCTGAACTACCCAAAGTATAAATGCCTGAACAATTAGTTTAGATCCGAGATTCCGCGCTTCCACCACTTAGTATGATTCATATTTTATATAATATATAAGATAAGTAACATTCCGTGAATTAATCTGATAAACTGTTTTGACAACTGGTTACTTCCCTAAGACTGTTTATATTAGGATTGTCAAGACACTCCGGTATTACTCGAGCCCGTAATACAACAGAACATATGAAATATCTGGTCTCTTGGCCCAGTTGGTTAAGGCACCGTGCTAATAACGCGGGGATCAGCGGTTCGATC…	-	-							-	0.966679	YIL079C	AIR1
Peak_284	9	211706	211978	CATAAACCCGCAGTAAGTACATATCACATGGGGACAATTCCTTTTCAAATGACCTCTTTGCGAACAATTATTACACTTTGGCTCTGCCTCCATTATCGCACCGTTTGAGTCATAATCTGTTATTCCAAAATACCGTCCTTGGCCACGTAAAGTCCTCAGTTCCTCTGGGTTAGCATCTACATCCTCTATGGAAGGAGCCAATAATTTATTAAATGATGACGAGTCACTTCCTGTCGGTGTTGTATCCTTCACATACGGCAAAGTATCGATACT	211814	-	TTGAGTCAT		AA		RR-YY		2.81591	0.966679	YIL079C	AIR1	G-SELEX
Peak_285	9	212144	212560	TTTAACAGTAGCAAGAAACAAAGACAAAGGACAAGCGCCTATGGAAGTCACTTTAGAAATATTGAAGTCACATTTTCATATAATATATAAATGAATTTACAGATGTGCCATTGTATATGCTGACGCAAACGCTTTCTTTTTACTGTTTAAATGACTCTTACCTTGTGATATGTATAAATCATCATATACGGCTATCTTGCTAAAAAATTTTTTTCGAGGAATTTTCACTTGAAAAAAATACTTGCGATGGCAACAAAAGAAAGTTAGATAAATCGTGCATTAAATGATGTGTCATCTGAAAGATTACAGGTTAACGAAAAATTAACAGCTAACAGAGCAAGAAAATAAAACGGAGATGAGTGCTAGTGAAGCAGGTGTCACTGAGCAAGTCAAAAAGCT…	-	-							-	0.873876	YIL078W	THS1	G-SELEX
Peak_286	9	237921	238297	TGGAAAATAATCATAGAATACAATGAGAAAGAATGTAAAAGAAATAATTTTATTAGCGTACATGATTGTGTATATGTTTTGTTTAAAAAAGTTTATTTAAAAAAGGTCTTAATACATACTAACGAAAAGAAACCGCTCCAAGTTAGATAAGGAAAGGGAAAAATGCCACCAGAAAGAATCAACCGGAACATGACTCACAAGCTTCTGGAGTAGGAGCAGTACAAGCAATCACCTTTTCATTGTAAATGTCACATTTCTTCTCGTCGGAATCTTCTTTTATTGTTTCCGTTGGAACTGCTGGGGCAACACTATCTTCCAATTTCACATTTGACATGGCACTCGACACCGATGATTGTTCGGATGGAACTGGAGATGCA	238114	-	ATGACTCAC		AC		RY		6.66432	1.00134	YIL067C	YIL067C	G-SELEX
Peak_287	9	248769	249449	TTACACCGCGAGTCGTGGGTGCATTGTAGTTTATTACGAAAAGTATCTACAATACTTGCTTAAATAACCTACATTGTTTTAGGCACTATGGCCGAGTGGTTAAGGCGACAGACTTGAAATCTGTTGGGCTCTGCCCGCGCTGGTTCAAATCCTGCTGGTGTCGTTATTTTTTTATTTTTATTTTTTTTTTATCGCTTACTGATTATCAGATATCTTCGACAGCCTCACACAGATTGGTGATCACGCACCCATAATCATTTCTTCGGGCATGCTCCTATTAGCCACGGTTCGCAGAATAATCTGCGCGATGTTATTCACCAAGACCGTGGAGTCTCCTTTTCGGTGGGATCCGCTTATATCCGTATGCGTCGGTTGCTTTCTCGGGGAAAGGAAAAGGAG…	-	-							-	3.63285	YIL056W	VHR1
Peak_288	9	250245	250778	CGAAAAGTTAGTCACTGCTGCTGTGCAATCAGTGAGAAGGAATAGAAAACGATCAAAAAAACGCTACGCTCTCAGCATAGCCAATGGCAGTGGCGGCAATGTCAACAACAGCATCTCGTCAAATTCTACTTCTGACGACGAGATCTCTCCGTCGATCTACCAGCGCTCCAATTCGGACTTCCTGCCTAGTTCTAATTATGCTGCAGATTTCCAGTTTTCAAACAAGTTCCAGCCTCTCATGAGTCACCAGAGTCATAACGGAACCATTTTTCCAACCGTGGGCACCCAAAATGACTCATCTCCATCGGTTACTTCGACCCAACAAAAGTATAACGATATAGTCACCATGCTAGTGCACGATCTTGTTACGAATGTCGTACCCCTATCAGAACAAGCTCT…	250487	250539	ATGAGTCAC	ATGACTCAT	GT	AT	RY	RY	40.9011	3.63285	YIL056W	VHR1	G-SELEX
Peak_289	9	258260	258495	AACGGAATTTCTTAAAAACATTATTGGTAATATATTTGTGTGTATGTGTTGTCCTTTTTACCTGTAAATCTCACACAATTTACTAGCTAACCTAATTCTTATGCATGTGTAAGACCCATTTAGTCATATGTATTTATATATATCAGGGGATCCATACGGTGTGTTTTTCGCTGGATGAGCGACAGAGGCGGAATCGCATCTCCGCAAATGAGAGCGTACACAGGAGCAAAGTGAAT	-	-							-	2.22157	YIL051C	MMF1	G-SELEX
Peak_290	9	300095	300442	TTCTTAACGTAATCTTATGGCTTCATAGATCGGTCATAATCATCTTTTCAATGTCCTCAATCGATGCGTTTTCAACCAGTTTTCCGTCTCTAATGATTTAATTTTTCTATTGAATTGAAAATGGTAAAAAGATAGCCCTGTAGGGGGCTCGAACCCCTAACCTTATGATTAAGAGTCATACGCGCTACCGATTGCGCCAACAAGGCTATTTCGTTGGAAAAACTACTTATTTTAGGAAGTAATAGCACATTTAAGATGCTTGTTGGAATGAAACTTTAAAATATCATCTGTTTAGTACTATTCATGTTACTAATTAAGATATGGGTGAATTTTGAGATAATTGTTGGG	-	-							-	0.713352	YIL030C	SSM4	G-SELEX
Peak_291	9	366820	367049	TTTTCCTTCATTCTCTTTTTTGCCTGTTCTTTCAGATAAGCTGCTCTTTCTTCAGCAGTTTTGAACTGAGAATAAGAAGGCGACGAGGAACGGTCATCTACAGGGGTTGGTGTTGAGGAAGGCACAAAGGGAGATGACTCAGTCACTGATTTATTTGAATTTGACTTCAGATCATCCAAAAATTCACGAACACCATCTTCTAACCCTATGCCAAATTCCCATCTTTCAAA	366957	-	ATGACTCAG		AG		RR-YY		2.87457	1.82674	YIR005W	IST3	G-SELEX
Peak_292	9	384055	384379	ATACCCTTCCTGCTTGCAATGTCAATGTTTGTTGATTTCTTTTCCCACCCTTGTTTCGCACTCATATTGACGAACAAAACAATTTGTCTTCGTAACTACCACTGGTTATAAATAGTTAAATTCAAGTTACCTCGTGTTCTTAGTCATTGGCTGCCCGGCCTTGACTCACGCCAGTGACCTACAACTATGGCGTTTCCGCTTCCCGCCCAAAACTGTGGTGTTAGAAAGTAGAAAAAGGTGAAAAAAGCGAAACCTAAAACCAAAAAAAAAAAATAAGTCACGTGCACTCAGTACCCCTTCTATTGTATTTTAGTTTACCTATTGG	384219	-	TTGACTCAC		TC		RR-YY		6.55872	5.42533	YIR017C	MET28	G-SELEX
Peak_293	9	386577	386938	CTCGAATGACAGATCGGTGGCTACCACGAAATCTTATAGGCGTTTCTCTGGGCTCCCTAGTTACGTATAGCGCTGACGTAGTTTAGAAGGGCGCGCGCATTTTTTCTATTGTTGCCTCTTTTCTCGCTAGCTGGCTTTTAGCATCATGTTCTGCGGATATTATTCTCCGCCCGGAAGGTTCGTGGAAGGCCTAGAATGAGATCTATCAATAACGCTACGCAGATTTCTAATGTTACATGTCACGTCGATCTGACATATATCTCCGTCAGGTTCGATCCAGACTCTCTGCGCGCGTACCAAGAGCTTTTTGTTTCAATAGGAACGGAATTTCCTTTATTGAATGTGGCAACGAACTGCGGAGG	-	-							-	-	YIR018C-A
Peak_294	9	420655	421138	TTTTAACCGTGGTAGGTGTTAAGGCAGCACGTGCCTCTAGGGGTTTAGTTTCAGCTCTTAGATGTAATGTGACGGCAGCCATTTTTGCGGTTGTGTGAAAAATAAAGCGTTTTCGTTGTTATCTTATGGTATGCCTCCTAAAATACCAGTTTCCGTCAGGGAAGATGGGCTTTTTATATATTTCATCGTGGTTTCTCGAGGATGACTTTATGACTCTTTGTCGCTGAAATCGCAGGGGAATTTTGGCGGTTGAGAGCGGAATTCCAAATTCCGCTGGAAAAAAAAAATAATAATGCAAAATGTATAAATGTATAAGAGTCTTTTTTGACTCATCGACTTAGTATGTAACAATTTATATGTACCTGCTATCCTCAAGGCATAAAGTCCGCCAAGGCAGGG…	420983	-	TTGACTCAT		TT		RR-YY		6.9811	8.42939	YIR034C	LYS1	G-SELEX
Peak_295	10	10110	10534	TCCTTTGAGAACAAATGGCTACCAAAGTTTCATTCAAATAAGCCTGACAATCAACCCCATCAAAGAGGAGCTCTTTGTTTTTCCAAACCCATGAGAAAAAAATACAGTTCCTTTTCCATACCAAAAAATGAAGAAGAAATCATGTGCTGAGAGTTGCCTGCAGTCGTAGAAGTTTACGATCCTAACCCATTATGTGATTCGTTGTGAGTCACCCTTCCATGATTATGTGTCCTTACTACCTACTATCCAATTACTACATATGTTTTGAACTCATATGTACCAAGCACCTAAAATTACGCACCCATTTCCATTGGCAAAGACTTGACGAAATTTAATACACTGCAATAATATCCAGCGATACTCTTCAAGAATTCCCGCCTATAATGGCGGCTCGCTGTC…	10317	-	GTGAGTCAC		GC		RY		14.5958	0.969993	YJL222W	VTH2	G-SELEX
Peak_296	10	36586	36883	TGGCGTCTTGTAGTCGGAGGTGTGGCGGGCCGGAAAAATAGTGGAAAAAAAGAAAATTAATGCGATAGCGACGGGCAGGTAGGGAGGTTTGAGGGGTCCGTAGTATGCGTCTATCGTTGCAACAAGGGTGACTAATGCCATGTCTTGGCCTTTGATGCAACGTCTCGGAAGTTAGTATCGATCCGAGGAGTGGAACGGATGCGATTTCCCCTCCATTCTATCGATAAGGTTGCTGGGAAACGCATTATAAGGGATGAGTGAAGACGGAGGGAAAGCATAACGAGGAGAGATTGCCGAG	-	-							-	1.61918	YJL210W	PEX2	G-SELEX
Peak_297	10	54483	54911	TGATGAAATTGGCGATAAGCAAGTTTATGACTTGCTTATTAATGCCCTCATGGATCGATTGGTAATGAAATTGCCACAGGCACCATATTCACTGGTGATTTTTTCATCTGGGTTTTCCCAGAGAAAAATAAGCTGGGTTTACGGTATTAAAATGTTTGCAAAGTTACCCAAAGAGACCAAGTTCTATTTACAAAAGATTTTTATTGTTCATGAGTCATTCTTCGTTAGGTCGGTCTATCAAGTAATTTCAAACGCTATGAACTTTAACTTCTTGGACTCAAAAGATAGTCAGCATGATTTTCCAAGTTTAGTTCATGTCTTGGACCTGACTTCTTTATCCGAGCTAATAGATATTACGCGACTTAGAATATCGTTGAACGTGTACTTATATGATTACCA…	54696	-	ATGAGTCAT		AT		RY		9.65622	1.18332	YJL201W	ECM25	G-SELEX
Peak_298	10	58842	59257	TTTATGTTTAAAGAAAGTCGAAAATTCTTATTTTTGCAAGTGCGCAAATCGAATAATACGAAAAGATGAAAATATTTTAGTTTATATACATGTTTGATGCCATACCATCTATTGACATAATCTACGATGTGAGAGCTGTATGATATTGTGGAACTTTGTATATATTGAAAAAATTTTCCAGTGGAATTTTACTCGCGATGACTCAAGAGCGTGAAAAAAAAAAAAAAAAAAAAATTAATTGCTAAAAAATCAAATATATGCTTCCAATCGGATTTGAACCGATGATCTCCACATTACTAGTGTGGCGCCTTACCAACTTGGCCATAGAAGCTTCTATTTTATATTTGCCTGACCTATTTTAACGGTTATATTCCACAAACATTTTAATCATGAAGCAAT…	59043	-	ATGACTCAA		AA		RR-YY		9.21037	2.80893	YJL200C	ACO2
Peak_299	10	65552	65782	GCAAATCGTCCACTTATATGGACTTGAAGAATTATGTTGGTAAAATGTCGGGCCTAGATCCAAATACACTATTTGGCTGTGAGATTTTCAGTAATCAAATCTATGTTAACTATGAGTCAACAGAGTCGAATGCTCAATTTTTAACCTTGCAGGAATTGATCAAACCTGCTGATGACGTTATTTTTTATGAATTACCAGTAACAAATGACAATGAAGTAATTGTTCCCGTAT	65667	-	ATGAGTCAA		TT		RR-YY		2.75724	0.973377	YJL197W	UBP12	G-SELEX
Peak_300	10	73787	74671	ATGGCTAACGGTACGTGAAAGGGGTGATATCCTGTTTAAAACCATTTAGTTATTCTTTTTTTCAGATGGAGACTGTGATCGGGTAGCGCATGATGTTATTATTGGAATTTTATTTTTTTTGCAACTTTGAAGCACTCCTAACTATATTGCAATAGTGTTATGAGATGCTACTTATGTTTGTAAGGCCATGAAATTCTGTAATACGGAGTTAAAATTTCTGCAATAAAGCACTTCAATGCTATTGTGTTATAGAGGCTCTGCGCTCACCCTTAATACTGTATCATCTGTAATAAAGAATGTTTATCTTAAAAGGATTGTAACTAAATGGTTGTTAGATAGTGACTCATTCGTTTATTTTTTAATAATCGAAAAAGCAGAAGTTCTGTTTACTAACAACTA…	74129	-	GTGACTCAT		GT		RY		16.9306	0.904516	YJL191W	RPS14B	G-SELEX
Peak_301	10	169341	169567	TAATGTTCTAACTGCAGTAACAGCACACCAATCAAATTCGACAGAAGAACCGATACGGTAAACACCAGAACCCAAGACCATAACACCGTGGTCATCAAAGGATAAATCGTGTGAGTCAGCATTGTATGTCATGTATAAATAGTTCGTGTAAGCGGGGAATTCAGCGGCAACTGTATCAATTTGTTTGACAAATGGTGTAATTCCATATTCTTTTCTTAATCTACGGA	169455	-	GTGAGTCAG		CC		RR-YY		2.51085	0.69999	YJL130C	URA2	G-SELEX
Peak_302	10	173029	173409	GTAGTTAAAACATACTAGATATGATATTATACTAATTGAGCAAAATAGAGAAGGAAAGAGAGGATTCTCTCTCTGAGTAAAATCGATGAGTGGGGATTTTGTCAAAGTATTTATACTTTTTGTCCATACCATTTGTCCTACTTTTTTACCGTTTTTTTTTTTTTCAAGGCCAGGGAAAAAAGAGTCATTGCGTTTGTGTGACATTTCTTTTAATATTCATCGGAGAACACCGGCGGGCCACAGAGAAAAAAAAAAAGTCCATATTCCATGTACACTGCAAATAACCAAGATTTTTCATTTTTCACGAAAAGAGGGACAATGTACTAATGGCGTTGACGATGACGAAAGCACCATTTTGGACATTGTATGTCGTACATTATC	-	-							-	0.69999	YJL130C	URA2
Peak_303	10	200980	201249	ACTATTAAAATCAATGACGAAAACAAAATCTCCGACAGAATTCGTAGTAAAAACATTGGGAGTATTTTAAACACTGGACTCAGTAGATGTGTAGATATCACCGATGAATCTATTACTAACAAAGATGAGTCAATGCACAACGCAAAACCCGAACTAATTCAGGAGCAGTTAAAAAAAACAAATCATGAAACTTCGTTTCCTAAAGAAGGGAGCATTGGAACAAATGTAAAATTCCGAAATACAAACAATGAGATTTCTTTAAAAACAGGC	201108	-	ATGAGTCAA		TT		RR-YY		3.75454	0.781753	YJL112W	MDV1	G-SELEX
Peak_304	10	268216	268798	TATTTGAAAACAGAGATAGCAATTCGGTAGATTTCAACACAGATACAAATTTAAATTTAAACCCTGATTCGCCATCAGTTACGTCTTCTAAGAAAAAATATTTAGATCATATTATTTTAGATAACCGAGACATCGTTAGCAACCATGACTCCAGTAAACAAAAATTCAAGATCCAGAATATTTTGAACTCGACCTTCTAACATTACGCTCCTTCGTATTACTCATTCAGCTCTTCCTCTGATAGCAGTGAATTTTCGAGGGTCACGTCGTGACTCATATGCTTTCTTGTTCCGTTTCGTTTCGAGATGACAAAAAACTGGTCATTTTTTCCGTTAAGTGCAACTCACAGCAGTATCGGCCGCTGAGAAATGCCCGGACAAATTTTTTTGAGCCGGATTG…	268488	-	GTGACTCAT		GT		RY		46.9787	29.8998	YJL088W	ARG3	G-SELEX
Peak_305	10	287379	287777	AGCTTTTTCATCACCTCTAACAGTTAACTGATTTTCTTCAGGGGTATGTAGTTTAATTTGAAGGTGGCCTTCTTGTTCAGAAATGTCCTCCATAATCAATTTCCATGTAGCGGAAGATGGTTTAAACAATGAGTCTTGAACCTCCTCGGAAAATTCGTAAGTTTTAGTCTCCATGTTGTTTTGTTTAGTACGTAGAGAGTTTAATGACTCATTGGCCTTGTTCAAAGATGCTTGAATCTCTTCAATAGATGGCTTGAAATCTTCATCTTCAGTTAAAGCAACAAGTAAAATACTGTTATCATTTGGATAATAATCACCGAATTGAACAAAGGCAACGCTGCTTTCGGAAGCTAATAAACAATGTTTAATAGACCCGCCGAACAACTCGTAATCCAAATC	287586	-	ATGACTCAT		AT		RY		7.0867	0.573692	YJL080C	SCP160	G-SELEX
Peak_306	10	297197	297563	GCCTTACACAACGGTTTTGAATAAAGACATAGACAATTCTAAGCCAGATCCAAGAAATATTTTGCCCCAGCGAACCCCAAGAAGTGCGGCTAAGAGGGCTGCCCAATTATTGGCAGGTGCCAAGAAAAACGAAGTCCCACAGAAAAGTACTGAAGATTCTAGTTCGGCAGCGTCCACAGACGATGAGTCAGAGAGTGGGATTGAAACAGATTTCTCATCAGACGATGATTTTAAAAGGAAAAATATGTCGGTGCCTAATAATGGGCCCAAAGACATTTCTTTACATTCTTTGAAAGGCAGTGTTGTTCCAGTGAAAGACTCAAAGATAATCAATAAAGAAGTTGATGAAGAAAGAAACGACAAAAGA	297383	-	ATGAGTCAG		CT		RR-YY		4.57585	0.856094	YJL076W	NET1	G-SELEX
Peak_307	10	298499	298847	ATTATCTGATCTTGTTTCAAGAGGCATCCCAGATGTAAAGGAAAAAACTTCTAAATCGAATGAGAAGTCACAAACAAAAGCCCCTTCAAGTAGTGATGATGAATCTAGCTCTGATTCTGACTCTAACTCCAGTTCGGACTCCGTATCGGATTCCAGTTCAGATTCTAAATCTGAGTCAGATTCTGATGACTCAGGGGATTCATCTGATGATGGAAAAAGTTTTATTAGTGCGAAATCCGCTAGTGCTGCTTTAGGTAAGAAGAAGAAGCCAAGTGGTGGATTTGCATCATTAATAAAAGATTTCAAGAAAAAATGATACCAGAAAGTCTCAGTAGAATACACGTCACAG	298673	298688	CTGAGTCAG	ATGACTCAG	CG	AG	YR	RR-YY	4.43505	0.856094	YJL076W	NET1	G-SELEX
Peak_308	10	305863	306217	GCGTCTATGAAACTAGTCTTATTTCAGATCAGCCGTTGATCCTCTCTAAGTATAAAACTCTTTTTTGTTAACCATTTCATAGTTACACTTTAGGCGACTGATTTTTCATTAAATGGAAAATATCACAAGAAATTTCACGCTGGAGAAAAAAAAGGTTAGTCATCACTGATCTTCCCATGGAGTCATAAGCACGTTCGACATAAATTGTGAAAGTTAACACATTTGAAGCTAGGACCGTCAATCTAGGACACTAGTCGGTTACTTTTATCATGTGGAGGAGAATATTCGCGCATGAACTCAAGTATGATCAACCCAATGCATCTTCAAAAAACTTGATCCTTTCAGTTCTGAATAC	-	-							-	2.57844	YJL071W	ARG2	G-SELEX
Peak_309	10	342390	342617	TGCACATAGTAAAAGAAAAGTATACCAGTGTAGTGCGTAAATTAATACCTATATAATAATTCATTTTCGGTGACTCAACATTCCCTGCCTATATTTTAAGCACCTGCAAGAAATATAGATTATATACGAAGGATGGATTCTACTGATCTGTTCGATGTTTTCGAGGAAACACCTGTTGAGCTTCCTACAGATAGTAATGGAGAAAAAAATGCTGATACAAACGTAGGA	342463	-	GTGACTCAA		GA		RR-YY		3.14443	0.679723	YJL050W	MTR4
Peak_310	10	347759	348045	AAAAGATGTCAAACCTGAGTAAACCTTGTGTAGAAGAGAAGATTGTTCCATGTAGTCGAATGTTTTGTTATTGGCTTCCAGCGGTTCTAAGATGAGAGTCGATCTGGGCAACAGATCCAACTCTTGCAAACTTTTGAGTTCGTCATTTCGCGTAAGAGTCACTCTTGGTATATTTCTGTGGAAAAGGTAAGGTGTTCCATCATCGTAGCAATTATAGTCTAACCACATCCTTACTTTGTGTAATTTTGTTTGAGGAGGGAAAGTATTAGAGATTGTGTAACCATTGG	-	-							-	1.49568	YJL048C	UBX6	G-SELEX
Peak_311	10	400521	400840	CCCGTTGCGAGCAACTCTTGTTTGTGGGGAAGAGACAGGCAAAACATTTCCAGTTGTGTTTTGTGATGAATTTTCAATATCATGTGATACTTCTGCAGTACGGTGGGAGATTGGTGGTTCTTGAGGGTAAATTTTTTCTCCGGAATTAACATTCTCTGACTCATTATTACCTATCTGAAAAGCTTGCTCCACCATCGAATGCTTTCTCAACCCATCGTTTGCATCCTCAAACTCGTGGTCGTCAGTATCTTCATCAGAATCATGGTCAGAGTATTCGGGATGTGCATTATCAACAGCAGCTAAATTGTGATAGGCGTGTG	400680	-	CTGACTCAT		CT		RR-YY		3.28523	1.34774	YJL020C	BBC1	G-SELEX
Peak_312	10	414815	415179	GGTGTTGGATTCACTCAACTTCTCTTCTACTGTGGCTGTTATTTGCTTAACTTTCATAGATCGATGGCATTGAAAAAAATAATTTTTCAGGCAATTTTCCTTTTTTTACTTGGTATAATTTTCAGGAATTGAAGGATTTTTCAACGAATTAGCCTTGTTGGCGCAATCGGTAGCGCGTATGACTCTTAATCATAAGGTTAGGGGTTCGAGCCCCCTACAGGGCTAATATTTTTTTCTTGCCCACTTATTCAAGGAATAAGTGCTAATTATCTTTCAACCTTGCAGCGAAGCTTTCTTTTGTATTTCATCTCATAGAAGGTGAAATATCACACTATTTTGTAAATAGAAATAGTATATGTAGTTCG	-	-							-	0.833518	YJL011C	RPC17	G-SELEX
Peak_313	10	416221	416580	GATGTGTCAGGATGGAGAACGATATAGACTATGTGATAATGTAAAGTTAAATATCTGTTACTTGAACAATTAACTTGACGTTTGTATATGTAAGGATATGGGTCATTACATAGAAACTATAGTAAATAGTCTCAGTATTGTTATATTTGTCATGTTTGATATGACTAATCGGCGCATGTTTTACACCTCTTTTGTATAGTATAAGAAGATCTGCTTTTATTCTTGAACCCTACCACTATCTCGCCAAGTTTTTAAAAGATCCACTGCGATCATTGAAGATTCTATTTCAAATAAAAATCAACTATTACCTATCATCTAGCATTCATATTACTTGTATATTATCATATCTGTAAGAAGATG	-	-							-	0.833518	YJL011C	RPC17	G-SELEX
Peak_314	10	451713	452096	ACCCAAGCCTTGGATAAGCAAAAAGGTATTGAACAACTGGAAAGCGCTATTGAAAAAATTACAGAGGTTATTACAAAATACGGCGGTGTTTGCAACATTACCATGCCACCAAAGGCTGTCACTGCTACTGAAGACGCTGAGTTACAAGCTCTATTAGAAAGCAAAGAATTAGATAATAGATCTGACTCTGAAGACGATGAGGATGAGTCAGACGACGAGTAATCATTGCCGCGCCTAATTTTTCTAGGTGTTTTCAAGTGTCATACTGTTTTAGAAAATTTTGTATAGAACAAATACGTATATCCTGCCATATCATATTCTTTGCAATATACACCTTGTACATTTGGCTATTATAAATATTACAATCCATTTAATCATAATCAA	451919	-	ATGAGTCAG		CT		RR-YY		6.30059	0.981068	YJR008W	YJR008W	G-SELEX
Peak_315	10	466131	466531	GTACTTGTTGAGCTTCTTTGCAACGCATCTCGTTGTAGAGAATTGTCTAGATGTAGCAACTTTCGTTAACAAGCCCATCTCTACTTTTTTCTTGGCTGTTTACAAAAAAATACAAGAATCCGTTACTAAAGATTACAGGCGCTACAATGCATAATAAAACTTCAGTCTCTTCTTTTGTTACATTATATAATATACTACTATATTACTGAGTCATCTGGAGAGGAAAAGAGAAAATTTTTTTTCAGGCCCGGTTCCGCTCGCAGCGAAGAACAGCGCCATTTAACTATGTGACTAGTTAATTTTTTTTCTTTTCATGGGTTCAGCGAGGACGGAATGGATACAAGAGGGAATAAGAACATAAAAAGGTGAGGTGGAGAAGCAAATGCCAACCTAACCTAC…	466340	-	CTGAGTCAT		AG		RR-YY		8.21306	1.84128	YJR016C	ILV3
Peak_316	10	471609	471963	TTTCAAAAGGCCTTCGTTCTCCTTCAACCATTTGTCGATATTAATTGGTGTAGTATTAAACATTTTTTTCGATTTTTTTGGTAAATGTATGCTATTTCAGTTACTTGTAGACTGTCGTGAAAAGAATAAAGAAAGAATCTTTTACGTCCGTTTTTTTACTTTGCCGAATATGTTTCAGTGACTCACAATTTATCCTGACGCCGTCACAAAGGCAGCCATTCCATTGCAATAACGACACTCTGAATATTCACGAACGTTCACCAGACATTTGGAGGCAGCGTTCTAAATGCCGATACCCGTTCAGGAGTACAGGTGTCAGTGACAGAAAAATAATGGCACCGTTGACGTCGAAAAT	471790	-	GTGACTCAC		GC		RY		18.6906	5.26979	YJR025C	BNA1	G-SELEX
Peak_317	10	497204	497613	TTATAATCAGTCTAAGTACAAATTTATACCTTAGCTTCATTTCAGTTAAGGGCGATGCAATAAAAGTGGAAGAAAAAAAAAGAAGGGAAGAGGTTTGATAATATATATATATATATATATATAACATTGCTCAGAGAAACATACATCAGTGATGGAAGATAAAGAGCAGCAAGACAATGCGAAACTTGAAAACAATGAGTCACTAAAAGATCTGGGAGTTAACGTGCTTTCCCAAAGCAGTTTGGAGGAAAAAATAGCTAATGATGTAACTAACTTTAGCAACCTACAATCGCTGCAGCAAGAAGAGACTCGTCTAGAACGGAGTAAGACCGCTCTGCAACGTTATGTCAATAAGAAGAATCATCTCACAAGGAAGTTGAACAATACCACTAGGATATC…	497402	-	ATGAGTCAC		GT		RY		9.66795	2.8615	YJR035W	RAD26	G-SELEX
Peak_318	10	499855	500273	TGAACGAAGAAGTTCAAAAACATACCGAAAATTTAAAAAATTCCAAATCAGAGGAAAGTGACGATTTTGAACAACTGGTCAACCTATCTGGCGTATCTAAACTAGAAAGCTTTTATAACGGTAAGGAAAAAAAAGAGAATAGTAAAACAGAGGATGATAGATTAATCGAAGGGTTGCTAGGAGGAGAGAGCAATTTAGAAACCGTTATGAGTCATGATTCGGTTGTCAATTCGCACGCGGGCAGTTCTTCTTCGAATATAATTACAAAAGAGGCTTCCAGAGTAGCGATTGAGGCGGTTAATGCGCTAAGGAAATCGAGAAAAAAGATCACTAAGCAATATGAAATTGGGACACCTACTTGGACAGGTAGGTTTGGTAAAGCAGGTAAAATTAGAAAGA…	500065	-	ATGAGTCAT		AT		RY		14.2321	2.8615	YJR035W	RAD26	G-SELEX
Peak_319	10	522183	522581	AAAAATTATGCTAACAAGGCTGTTCTAGATGCACTACTAGCGGGGCTCACGACAAAGGACCTGCCTGACACGAGTCAAGGTTTTGATGCGAACTTTACGGGTACATTACCGCTAGAAGATGATGTTTGGCTGGAGCAGTACATATTTGACACTGATCCTCAATTACGCTTCGATCGGAAGTGCAGGAATGAGTCACTGTGCTCCATATATAGTAGGCTGTTCAAACTGGGTCTGTTTTTCGCCCAACTGTGTGTGAAAAGTGTGGTTTCTAGCGCAGAATTGCAAGACTGTATCAGCACCTCTCATTATGCGACTAAGCTGACCCGTTATTTCAATGATAATGGTAGTACACACGATGGTGCAGATGCAGGTGCTACCGTGCTGCCCACTGGCGACGAT	522374	-	ATGAGTCAC		GT		RY		6.84031	1.68331	YJR046W	TAH11	G-SELEX
Peak_320	10	557016	557392	ACTTGTCTAAGGATAAATTAGGTACATGTTCCAGAATTTACGAGCAGGAGTTTGGTACTACTAAGGATCGTATGCTGATTATCGAGCAAAGTAAAGAAACAAAAACTGTAACATGTTTTGTTCGCGGTTCCAATAAAATGATCGTGGATGAAGCTGAACGTGCATTGCATGACTCACTATGTGTGGTACGTAACTTGGTTAAAGACTCACGTGTAGTTTACGGTGGGGGAGCAGCCGAAGTGACTATGTCCCTGGCTGTCTCTGAGGAAGCTGATAAGCAACGTGGTATTGATCAGTATGCATTCCGTGGATTCGCCCAAGCGTTAGACACCATTCCAATGACTTTGGCTGAAAATTCTGGTCTTGATCCAATCGGA	557188	-	ATGACTCAC		AC		RY		7.69681	1.10502	YJR064W	CCT5	G-SELEX
Peak_321	10	557553	558031	TGATTTTAAAGATTGATAACGTCATCATTAGTGGTAAAGATGAGTATTGATTTTGTATAAATAAATAATAAAAGATAAGTTTTAATCACATATCCCACAATTTTTTTTCTCAGATCAGCATTTGGGGTTACTTGATTGTACATATACGTGTATATAATCAGTTGTATACGTATATTTAAATGAAGTGAGGGGCGTTTCAGTTATTTGCATTTGTTTTTGTACCTTTTTCCTTATAAGATGAGTCATGACTCAATAATCAAACCATGTTGAAAAGGCTGAAATTTCTAACAATTTCCGGACCATATTCCTCATAATCTTTCTTAGTGTGACAGTAGCCTTTGAATTCGGCTGTTTGTGCCAGCAGCGAGCCACCAAACCAGACAGCGTTTCTCTGCTTCC…	557794	557801	ATGAGTCAT	ATGACTCAA	AT	AA	RY	RR-YY	18.1157	1.39619	YJR065C	ARP3	G-SELEX
Peak_322	10	611724	611974	TTATGAGACAAGAATTAGCAGATTACTGTAAATCTAAAGGTCTCGTCGTCGAAGCCTTTGCCCCATTGTGTCACGGCTACAAAATGACTAATCCAGATTTATTAAAAGTTTGCAAAGAGGTGGACCGTAATCCAGGTCAAGTTTTGATTCGTTGGTCTTTACAACACGGTTATTTACCACTACCGAAGACTAAAACTGTGAAGAGGTTAGAAGGTAACCTTGCAGCCTACAACTTTGAACTGTCAGACGAA	-	-							-	0.544628	YJR097W	JJJ3	G-SELEX
Peak_323	10	632973	633508	CTTCCTTTATAGAACTAATTTTAACTATAGATGTTAGTTTTTCGATGCTTAAACTTAAATAGCGCTTCAAAAAAGAGATAAGGCATACTATAGAAGACGTATTAGTAATTATATATATACAAATAGCATGGCAGAAATGCTTATGACGGAAAAAAAAAGATTGGATTTTCTCGATGCTTACTCAAGGTGACACAATCGTTACGACATGGAGGTTCCTATCTCTGATATTCAAAAGTTATTGCCATCTCATCAATAAGAGTCATTCACAATAATCTATAGAATGCCGCAGGAAAGAAGACAGTGGTGGATGAGTCATTTTCTCAACCCTAGTTTACAATCTGAATGTTTAGGGGATTTACTATTTTTAATTAGGACATTTGAATATTTCTGATAGGGTAA…	633284	-	ATGAGTCAT		AT		RY		67.9103	1.97265	YJR110W	YMR1	G-SELEX
Peak_324	10	636701	636993	GTTCATTCTTGAAATACTTGCAAAATATATATGTATTTTTTATGATAAAGTAAAGGAAGTTTGGCAAGTGGAGCCTGCAGTGTGGCACTTGTATATATGTATGTGTAAGTCAGTACACAAGTATAAGCATATATGGTTATGCTTCGTTGAGTAATTATTAGTCACACATTTTTTTAGGCTCTTTAGGATCTGCATTTTTTTTTTGGCAAGCACGAATTGAAGGACAGAAAAAAGAAAAAAAGTGATGAGATTGAAACAATAACAAGGTAAACAAGTAAATGGGAAGCCAATAA	-	-							-	3.97341	YJR111C	YJR111C	G-SELEX
Peak_325	10	667078	667388	CACGGAAACAGCATGTTTTGTGTTGGGCGGAATAGATTCACCAATGGTTCTAGATATCATTTTTTCTTCTGTTCCTCTTCTCTCTCTTGTTTATGTAGGTCCCGAATCGGCACATGAGCGTCATTCTACTATCGTTATATATATGGGTATATATATATATATATATCCAAAATATATGACTAATTTTTAGACCGAGATATTGTGAAGTGCAGAGGCGCTATCATGATTTTTGTTTTTTACATCCACGCATGAAGATAAGTCATATTTACTAGGTTTGAAGGGTTTTACCTGAACAACACTGGCAATCATTG	-	-							-	4.61749	YJR130C	STR2	G-SELEX
Peak_326	10	686373	686791	GCAACAGCAACAACAACACACGGTAACACAAAATTCATATGGAGAGGTCCAAAAGTTGCTCTCCCAGCCATTAAGGATATTCAAAAACCAAACGTAATACCAGATCTATCAATAAAAACAATAGAGGCCTCTTTTTATGATGATTGTAATACTACAAATGATAAAATTAGCACTCCCACCACTTCTAACAATGACAATCTCGAAATGAATGACTCATTGGTCTCTGTGAGATCTGCTGATAACCAAAACACATCTTTGGCGCTGGATTCGCTCAAAGGACTAAGCAAAAGGAACTCATTGAAAGATTTTACTCAAAGAGTAATTACAAAATTTATTTCGAACATAGACACAAGTAAAAATAAAAAAATAAAGTCAACATTACTCAGAGATGATGTGGAT…	686585	-	ATGACTCAT		AT		RY		9.90261	1.08531	YJR138W	IML1	G-SELEX
Peak_327	10	691533	691970	TAGTCTTATGATTTTGTCAAAAAAGAATTTTTCTTGATAATCCCATGCAAGACCTTCGTCGTTGACCCAAAATTCCTCTTGTTCCTGGAAGAATTGGTTATCTTTAGACAGTAAGGTCAGAGCTTCGTTAACACCTATGACGCCTCTTTTTACCCACTTGTAACAAGCATTAACTAACAGATAATGGGGTTCTATGATCGGATCTTTAGCAGGTGATGACTCATAAGCTATTTGGCAACCCTGAGTAATATATTTGGCAACTAATTTACAATTATTACCACCATCTGTTTTGAAAAAGAACTTGGCCAGATTGTAAAAACTAGACCAATTCAACACGAATACATCGTCCTGTGACTTGATATCGCCGGATAAAGAACAAGCCCTATTAAAACATAAAAA…	691752	-	ATGACTCAT		AT		RY		20.0164	1.03145	YJR139C	HOM6	G-SELEX
Peak_328	10	703497	703823	TTTTAATGTTTGTTTATTTGTTTATTTCCTGCTGAACTGAATATTGAAAACATCGAAAAAATGCAGTACCCAGCTCTCCATTAGGACTTTTTACGTAATGACGAAAATGGACAAGCTGCGCAGGAAAGGACTACGAAAAGTATGCTGCCATAATGACAAGATAAGGCGCAACACACGTAATCATGACTAATGGTTGCACAGACGGTAGGCCAGGAGAAGGATTAGATCTCGTGCCGAACGACAGCAAGCTAGCTAGACTATGTTATCTGAGTGTAAACGAAAGCGCAGCAGTCTCTGCAAGAGCACGTGCGACGTGTCTGGTGTGCA	-	-							-	1.1878	YJR147W	HMS2	G-SELEX
Peak_329	11	3251	3665	TGCACCTAAAATATAGAGAAACATACTTAGAACTTACATATCAAACGTTATCTTAGTTATTAAAAATGAAAAATAGCTGGGCAGTGACACCTGAAATACCCCAAAAAAAAGAGCAACTATCTAGAAAAGTATGTAGAAGTCCGAAAGGAACAGAGGGTGCCACCAATAGCTTTCACAAAGAGTTCCTTTCGTGTTGGCAAAAAAAATGAGTCACTTACTACAGGTTCAATTTTTATAATTCAATTGTTGTACCTATCTGGAAAAGAAGTCCTCAAAATTACTCCACCCGGAAATAGCTGTATCAAAGAAGGCACTTGGAGAACCTAATATATCATCGATGAAATTTTCCGAGAAATCTTCTAAAGGTCCCTCTAAATCATTTAGTATAGTTGTTAAACT…	3460	-	ATGAGTCAC		GT		RY		9.59755	1.4245	YKL224C	PAU16	G-SELEX
Peak_330	11	18432	18737	GCAGAATGAAAATGTAACTCTTTATATTCCAAAGCTTATCTTTTTCTCACGTACCGTCCTATAGACCCTGATTTTATGATAAGAGGCTGAATTTACTAATTAGTCATTTTTTTCAGTTTTTTTGTCATAGAAGCCACATTTAAAAGAAGTCAGCCAAGTTACCTGTAAATATTAAAACAACCTGCTTAGAATGACTGTTAATTTACAGAATTTACGATAAAAATATAACTTGGCTCTAGGGCGTGATGATAGTGACAAAAAACTCGTCAAGTAAATGTTGGGAGCTTACTTGCCGTCGTTTTCTAA	-	-							-	6.06957	YKL218C	SRY1	G-SELEX
Peak_331	11	38089	38470	GAATCGTAGTTGTCAATTAGAACCACATGCTTATTGATTGGGTTTGTTGCAGCGTGCACAGACATTTTTTTCTTACTTTTATGGCGTTCTATGTAGAACCAAACAGATTTGGTAATGTGTTAATACTGACCAGCTCCTTGTCGAACTTTTTGCGTACCTTAATATCTGCTATAGATTAGAATGAGTCAACGAGCCATTGATGATCATTCAATGATTACTACAAGAGGCATTTTCCGTCGTCAGTGATATGAATAGCACGGTGAGGTCCAGAAGAGATAGTAGGAAGTTTAATACTGGCTCAAAGGCATACTTATATCGACAAGCTAAGCGCAAATACTACTTTGTGGTACATCATCAGCATTGCTTTCGAGAAAACAGCATT	38273	-	ATGAGTCAA		TT		RR-YY		6.85204	4.07821	YKL211C	TRP3	G-SELEX
Peak_332	11	117026	117282	TTTCAATCCAATTAAATATACTTTTGAACCAAACGTGAACGAATTCTTTAAATGTCTCAGGGTAAAGGAAAAGCCTAGGAATCTCAGACATAGAACGTAAACCTGGTATGACTCTTTTTTGTAAAGTTTGCACCATTATTTCAATTTCCTTGGGATAATGCGTCCTGATGTCAATATTTGACAATTTTATGACTGAATTATTGCTGTAATTGCCAGTATTTTCTTGCATAATACGGTTTTTAGTCAAGAAACCAATG	-	-							-	0.963965	YKL176C	LST4	G-SELEX
Peak_333	11	143142	143439	GATTTACGTCCGCCATCTCAATTTCTTTTATTAGCGTTGCTTCTATAATTGGCAGGACATAAAAAGGCTGCTAATAATAAATGATGATATAATTAAGAGCAAGCTGGCCGATCTCTCCATTTTTATGCGCTCCAAGCCACGTCATTTTCCGATGACAGGAATGCTTTGCATATTTCATATGAGATATACATTGACTCCTTTTCGACCAACCGTTTCATTAAAGGGGCAGCAGCTGTCAAAAAAGTAGCCGAAAAAGGCGTCTGGCTTCGAGGAATTATTACCTAAATAGGAAAGGCAG	-	-							-	0.672864	YKL164C	PIR1
Peak_334	11	202655	203191	GGGCTCGAGTAATACCGGAGTGTCTTGACAATCCTAATATAAACAGTCTTAGGGAAGTAACCAGTTGTCAAAACAGTTTATCAGATTAATTCACGGAATGTTACTTATCTTATATATTATATAAAATATGAATCATACTAAGTGGTGGAAGCGCGGAATCTCGGATCTAAACTAATTGTTCAGGCATTTATACTTTGGGTAGTTCAGCTAGGGAAGGTCGGGTTTTGTCTCATGTTGTTCGTTTTGTTATAAGGTTGTTTCATATGTGTTTTATGAACGTTCAGGGTGACGTATTGTCATACTGACATATCTCATTTTGAGATACAACACAATCACGTTTAAAAGCCTTGTTGGCGCAATCGGTAGCGCGTATGACTCTTAATCATAAGGTTAGGGGTT…	-	-							-	0.705633	YKL127W	PGM1	G-SELEX
Peak_335	11	223932	224369	TTCAAATCTACCAGAGAACTTCCTACTAAATTTCCAGTACCAGCCATATTTTCTAATACAATTTTAACAAATTTCGTTTCCTTAATTGCTTTGTTCAAATATGAGGCTAGTTGTTTTAACTGCAACTGATGGTCTCCTTTCAAAGTAGAACCTGGATGTAAGTTATACAGGCCTATCCCTAATTGCTCACACCTGTTCAGATCGTCCATGAATGACTCATAACTCTTTTCTGCCTTTTCCCTATCCGGATTAGCCAAATTAATAAAGTATTGGCCATGCGGTAAGACGTCCGTCAATGGGTTATAATTGTAAGTTGCACAGTTTTTCTTAAATTTATCTATTTCCTCCTGTGTATACTGCGGAGAAACCCACTTTCTTGGAGATTTTAAAAACATGGCA…	224147	-	ATGACTCAT		AT		RY		17.8223	1.21735	YKL114C	APN1	G-SELEX
Peak_336	11	239844	240162	TGGGGTAGAGTGCACTATTATTTTTATCAATGTATAGAGGGACATGATCAGGCAATCGTCTCGATGTTGTGCTCGCCTGAGGAGCTTTTGGAAAACACTTGGACGCCTCGTGTGAAGCCAAGTTGCCAGATGATGGAGGATTTGATGGCTTCTTGCTATGATATGGAGGGGATGAAGATGAGTCAGAAGCTGGATATACTATATTATGCGAAAGAGTAGCCTCATTTGAACTACCACGTAGAGTTCTTAGGCACGAACGATTGGTGATTTTTCTTTTATCGTCGAGACGCTTGGGAGACATCACGGGTATTTGATGAGA	240025	-	ATGAGTCAG		CT		RR-YY		3.19136	1.45508	YKL106W	AAT1	G-SELEX
Peak_337	11	258636	258945	CTCCAGGGCACTTGAAACAATGCAGCGATCGCCGCCACAACACGCCAAAGAGAAGCGAAAGTGGGCCTGGGCGGCCTCAGTTTCGGCAGAGGTAAACAACACGAACTGAACTGCCTTAGCTCCGAAGGGCAATTCCACAGGCACTCCGCGGGGCCCGGCCAAGGCCCAAAAGGCGTGGAATATGCGCGTTTTGGGGCCATAACACCCAGTACCACGGCCGGAACGGGCCATATAATAAGTTTTTCACTCTCAAGAATGGTAAACGTAAATAGGAACATCCCACTACCCTAGAAATTGCGGAAATTTCGCG	-	-							-	0.70522	YKL096W-A	CWP2
Peak_338	11	259594	259877	AAGTGTTTGATTCTTTTCTTTTCGTTAATATATTTTTACACATAATTTTAAATAATTTTTGTTATTTTGAATAGGTAGATACCATAAAAATAAAACACTTTTTACTTTAACGATGTTCCTGTGATTTCTCTTCGAATGAGTCAAAAATTTGAACTCGAAATGAATGTATTAGAGACTGGGTTTCTTCGAGTTTGCTGAGATCTTGGCTATGCACAATGTTTCCTGCGCCCCTAAGGTGAAAAAAACATGCATGCTTGTTTCAACAGACCAGTGTGCATAAAGAA	259733	-	ATGAGTCAA		TT		RR-YY		2.85111	-	YKL096C-B
Peak_339	11	273823	274312	ACATATAAAAGAAAGTACTCCACTCGGTATAGCCTTGACACTTCAGAAAGCCCTTCTGTAAGGTTGACACCTGATAGAATCACTAATAAGAATGTTTATTCAGATGTACCTGATTTGGTTGCTGATGAGGATGACGATGATAGAGTAAACACTTCTTTAAACACATCTGATAACGCATTATTAGAAGACGAATTAGAAGATGACGGGTTTATACCTGAAAGTGAAGAGGACGGTGATTACATTGAAAGTGACTCATCTTTGGATTCAGGCTCGGATTCAGCCAGTGATTCAGATGGAGATAACACCTATCAAGAAGTAGAAGAGGAGGCTGAGGTGAACACAAATGACAATGAAGATGATTATATAAGACGACAAGCGAGTGATGTGGTTCGTACAGAT…	274074	-	GTGACTCAT		GT		RY		15.8395	1.61194	YKL089W	MIF2	G-SELEX
Peak_340	11	325379	325644	CAGATTAAAAAAATTGTGCACGTTCTGGTTTTAACGTATAGACTTCTAATATATTTCTCCATACTTGGTATTTTTTATTCACTTTTTTTATACATATTTGGTTTTTTTATACAATATCAAAAATCAATAATAATTAATTTAATAACAAGAATATGTTGCTGTGATGACTCTTAATATACAATTGGGAAGCATTCAAGGATTGGTACGACGTTTGCTTTCTGATAATTAAACGCTTGGCGTTTAATCTTTTTTGCCGATTAATAATA	-	-							-	0.916724	YKL061W	YKL061W	G-SELEX
Peak_341	11	335687	336175	CTTAATACAGATGTTTGTCATCGTCACAGGGCTCATAAAGTTAACATTCATTATGTCCTGAATTTGAGATGCAGTGGTTCTTACACTTAATGATTCTTGAGTCAAGCCTGCGCAGTTAATCAATAAGTTTACGTAGTAGCGGCGTTCATTATTTGACCATTTGTTACATGGGTCGAACAATGTGGAATATTTCTGTTTCAAGGGCGGTCTATCTTTGAAATATTCGATACCGTCATATGACTCATAGTCAAGCCAGTGAGGCCATTTCTTAAAATCAATTGCTATAGCACATTGCCGCTGATATGATAATCCCGATTGTAATTGGCCTCTATCTATCGCGGTGCGCTCTATACTTTCTTTAGTAGACCCAAGTATAATGCAACTTAAACCCTTTTGAAA…	335787	335927	TTGAGTCAA	ATGACTCAT	TA	AT	YR	RY	17.8693	0.652899	YKL055C	OAR1	G-SELEX
Peak_342	11	374273	374640	TAGACTTAGGATAATTCACAAGGGTTTTTAGTGTTACCCTTTTTCCGTATGACACATTTTTCGAGGAATTAATTATTGGGAAAATATTGCCGATCAAGATCCATTGAGGTGAATCTAAATCGCTCCAACTCCAAGTTGGGGAATCTTAAGACCGTCACTGCCTTCCAATTACACTGCTTTTGTTTCTTTGACAATAAGAACGCAAAAGTAAATTTCTTTTTTTTAACAAATTATGACACATCCTGTAGCAGTGAAGGCATGTCTATTTGACATGGATGGTCTTCTCATCAACACAGAGGATATTTATACTGAAACTTTAAATGAAACTCTCGCAGAATTTGGTAAGGGACCTTTAACTTGGGATGTGA	-	-							-	2.32528	YKL033W-A	YKL033W-A	G-SELEX
Peak_343	11	383394	383724	ATCACTCTTAGCGTATACGTGTTGGGCGGGAGTGGAGTTAGCCTCGTAAGATTGTAGAATTAACCCACGTCTGTCCATCAAGAAGATTTTCTTGCGCGCTTCTTCCTTGTCAACGCCGTGCGTGACCATATGATTCACAATTTGATCTGCGATACCGAGGCCCGCAGACCCGGCACCGTAAATAAGCACTCTGGTGTCTTTCAAGTCTCTGTTGGTATGTTTCAAAGCAGCAATCAACGAGGCCATCACGACGGCACCGGTGCCCTGAATGTCATCGTTGAATGATGGCAATTCGTACCTGTACTTTTCTAGTAATCTTCTAGCGTTCTTA	-	-							-	1.17168	YKL029C	MAE1
Peak_344	11	393519	393891	ATAAACCTAGGGTTGAAAATATAATCAGTTAGGTGTCATGATATTGATACATTTATTTCTATAGGTCTGAGAGTACTAACTTAGGGTATATGAGGGGTGTTAAGTTGGGATGATGACGCATTAATTAAGAGTTCATTATATGAGGATATTGTATACAATGCAAGAATAGCGCCCCAATCCCGGCCAGGTATAACGTGCAAGCATGAATAAAGAAGAATTATTGGGTTTTCTACTAGATGACAGTATTGATAGCCAAAAAAGATGCGTCACGGATCAGCAGGCCTACTCTAATTGGTTAAAGAATGATAATGATGAACGTACGGCCCATGAGGAAAGCTCTTCACAAAGTACGATAGCCGCATTGAATAAGAAG	-	-							-	1.71315	YKL023W	YKL023W	G-SELEX
Peak_345	11	394780	395074	TTTGCTGTCATGACCTCCCTTTCTTAGAGCTTTGTTATTCTGATCAAAGATCTCCTTTTGTGTTCTCAACCTTTTAGCCATGTTGACAGGGTCATAAGTCAATGAAGATCTTTTTTTATTGAGCGAAGCCTTGTCCTTACTTGCCTGACTCATTAAATTCGACTTGTCAATAAGTGGGTGGCTGGCATCCAATGATAACGTCACGTTTAGCTCTAGGGCATTTTTCAAAAGCGCTGTTGCAGATGAATTATTAGGCTTTAGGTACAATGATTTGTGCAAATGATCAATGGCCTTT	394928	-	CTGACTCAT		CT		RR-YY		2.90977	1.71315	YKL023W	YKL023W	G-SELEX
Peak_346	11	408107	408519	AAAGTATTGTACTAGTAGAAATATGTTTTACACCTACGCTAAGCAGCAAGTGGTAATTGGTGTATCTTTTACTTTTTTGGGGGCATCAAGACAAATATCCAATCAAATCGAAGAGAAAATAATTCTTGTAACCCGCTCATTAGTCACGTGGTCATCACGTGAGCATAATATATCACGTGATATACACCCATACCTCGTTTATGGGATTGAGTCATCGGATATGTCATTATAAACGATATTTCTCCGCGGCAATGAGGTGGCGAATATTGGAGTAAAAATGAAAACATCCACCAGGTGCTTGATGATATACTTGACTTCGGCGGCAATTTAAAGCTTTCTAAGCAGCAATTAGTAAGTAACCATTACAATAACGATAAATACGACACTGGTCCAACTAAC…	408317	-	TTGAGTCAT		AA		RR-YY		10.6183	1.19329	YKL015W	PUT3	G-SELEX
Peak_347	11	416142	416582	TAGTAGTTCTCTTGAAGGATTTCTCCTTTAAAATGTCGTTTATGAATACCGATAGTATGTGCTCAGATAACTTGTCAGAATCAGCCTTATTCATGAATTTAAATAGGTTGCTCATAATCTTAAAGTTTTCTGTCAAAAGTTCTTTTCTCACGAATGGGGAAGCATTTGAGATCAATGTCAACCAAAACTTGATAAATGTAAATCTTAATGAGTCATGTTTGGATGAATCAGCAGATGAATTCCCATTGGCTAACTCAGACTTGCTTGGTACCAACAGTCTTGGTAAAATAGGTAATGAAAAATCGAAATATGAAACTAATTCCTCTATATGTTGCCCATTGTTGAAATTGACTATTTGTTTGAGTAGACGAAGAATTGGATTAGTTAATTGCGCACGCA…	416353	-	ATGAGTCAT		AT		RY		10.9116	0.853928	YKL014C	URB1	G-SELEX
Peak_348	11	448446	448816	GTGATTGAAAGGAATTAAATGAGCAACGTGCATAAATAATATCGGTAAAGAAAAAAGAGCGCAATGGTTTCATGACTATTCTACACCAAGTTGTTGCGCCATTTTATCTAAGCTGATCCCCTTTTCTGGTATGCTTACAGGAAGAGAATAGAAATACTCTTCGTCAAATTCAACTTCGTCATCTGACCAATCGTTATCATCATCTGAGTCATCGATACTATGATCTCTAAAAGATACCCGCGACCGGTAAGAAAACCCCAACATCATCAATGTAGTAATTGATACTGTGATGGCAGTGAATATGAAAATCCTTTTGTCTAATTGAGATGCCGCCGATATGAATTCACCAGAATCTAGTTCTGGTAAGTGCG	448653	-	CTGAGTCAT		AG		RR-YY		4.48199	0.733778	YKR004C	ECM9	G-SELEX
Peak_349	11	465757	466282	CCAGTTCCTTGCCTTTTGTAGTGAATCTTCCTGCGTAATGTCATAAACAACTAATGCTGCATTAGCGTTTCTATAATACATTGGTGCCAATGACTTGTATCTTTCTTGACCAGCAGTATCCCAGATTTCAAATTTTATAACGACATCCTTTGTTTCATTACCATCGTTTGGGTGAATAGTGATTGATTGAGATAAAAAAGCAGCACCAATCGTACTTTCACGTAGTTCATCGAATGTATCCTTAACAAAACGATGAACAATGGAAGATTTACCCACGGATGAGTCACCCAATAAAACTAGTTTAAATTGCAACATCTGTTAATAATATATACGTTTACTCCAAATAAGTTAAACCTTCTTCCTACCCTCGCACTATAAAAAAAAATTTAGATATGTCCA…	466039	-	ATGAGTCAC		GT		RY		26.8802	1.76081	YKR014C	YPT52	G-SELEX
Peak_350	11	518863	519488	CAAACATCGTTATCATAAGTCCAAAGTCACAAAACTGTTTCAGGCCATTAACGGCCTGTGGGAGCAAGAAAAGACCGAGAAAAGGTAATGAAAAAGTGGAACTAGACCCCACGTCAGCGGGCCTAGGCCCTTCAATGTGTTAGAATACACAGCGTGCCTAGTTCCTGGTGCCTGGATCTCGAGGCCGCGGCACTGGAAAAGCCCTTTCTTTTCCAGATCGGGAAACCTAATGAGTCCATAAAAAGAAATGTAGAGGTGGTGTTGACGTTTTGCCGCTTTTGGGCAAGTAGGTCTTTCTGCACGGCCCGGCCCGGGTCGTGCGGAAAAAGAAAAAAGCAGACAAAACAAAATTTTTCCTTTTTTTCGCCTTTGTTTCTCCTGATTCGGGTATATAAGTGA…	-	-							-	1.16523	YKR042W	UTH1
Peak_351	11	533746	533973	TTCCTGTGGGTTAAAAGAGGGTGAACCACGGCAAACATGCATGTGTAAAACCCAAAACGCCGATCTAGGGCCTGCGACGCATGGTACGAACATCCTGAAGGTATATAAAAGAGCTAAAGTCTTGACTCATGCCTGAAATCTTGATTTTTCATTGTTATATCCTCTCTATACATTAGTAAGCACCATAGATGGGCTGGCTATCAAAAGCGAGAAAAAAAAAATGCTGAA	533871	-	TTGACTCAT		TT		RR-YY		2.62818	1.07471	YKR052C	MRS4
Peak_352	11	552225	552594	TGGTCTTACTCACGTTAAGAGAAAAGAAAAAGAGGATTCGATTTAAGCTTCATATCGTTCAGACTAATAGGTAACTGACGATTTTTCTCTTCATTACCAACTTTTCACCATATGTTCTAATTCGTCGGATTTTCGATGAAGCGTTTTAGGTACTCTATAGGTATTTAGGTTATAATAATATATTGTATTTTTAGACAACCGGAACCTGTTTAATTTGAAGAGTCATTGTATTCTTGGCTATTCTGTTTAAAGTTTTGCAGTGTGGAGTCCCTGAGAAACCCCCGAGCAAAAAAAAGACCCCAAAACCCCGTAAATATTACTACTCTACTTGTGTGTTATACATTTTCAGGAGTCAAAACGTACTAACAAC	-	-							-	1.4092	YKR058W	GLG1
Peak_353	11	575651	575964	AATTATTTCAAACCCATTGATTAATGCATCTACTTTATAAATATCACTTAAACCAATTAGTGAGCCGTTTGGTTTCAATGAGTCAGCTAAGACAGAAATTAACTTTTTCGGAAACTTAATATCAGTCTGGGCTTCTGGCGTCAAATAGTGTACTGTTTCATATTTTGCGTTTTCCAAAGTTATGGACCCATCATTTAGTTTATTGATTAAAAACTGGTCCACGAACTTGACTTTCTTTGATGCAGCTTGAGCCTTAGTGTTCTCTACTAGCTCTGGCGTTGTAGTCACCGCCGGATGTATTAAAAGTAAACCAG	575732	-	ATGAGTCAG		CT		RR-YY		2.9919	1.15592	YKR071C	DRE2	G-SELEX
Peak_354	11	578268	578597	GATAAGTGGACAAGTACAAGTGAGGGATCGTGATCCAAGAGCACTCTGTGACTTCTTCTCCTCTAATATCACCTCCCCAGAAAAGCATCGATGCCATTTTTTGCAAGAGAAAAAGTTGCGTGCGTCACTGCCCACGAGCACATGGGGTGAGTTATATAACATAAGAATATTGCTTTGACTCATGTTAAAAGCAAAAGAAAAAATAATAATGATCATTAGAGATACATCAAAGACGATCATGGCATTAACCCAGGGTACGTGTGTTAGATATGATAGGGTACCCCGCGCGTATAAGTTACGCCTTGAATGATATAACACGTTAAAGTTTCT	578446	-	TTGACTCAT		TT		RR-YY		2.065	0.990381	YKR072C	SIS2	G-SELEX
Peak_355	11	605266	605498	GTCATTGAATGACAATCCAGCATTAGTACCAACCCTTTGTCCATTATTACTATTTGGCATGATATCGTTGTCAAAGTCTTCGAAATAGCCATCAAATTCATCATCCTCCCCTTGGCCCATATTGGCATTTCCTGCTTCGTAAGACTGACTCATTTGTGTAACCAATATCTTTCTTCCACCATAATAATATTTTCAAATATGTTGAAGGTATTGTTTTAGTAAAGTGGCTTTTT	605414	-	CTGACTCAT		CT		RR-YY		2.83937	1.08246	YKR088C	TVP38	G-SELEX
Peak_356	11	630516	630752	AGCCCCCACCCAGGGCCTTGTCGGAAAAAATCGGAATATCCCACACGATCCACCGGAGAATATCGGGACGCTGACGGGTGAATGGAGATCTGGATTTCCTAATTTGGATACATCTCTTTTCTTTTTTTGACTCACAATAGGAAAAAACCGAGCTTCCTTTCATCCGGCGCGGCTGTGTTCTACATATCACTGAAGCTCCGGGTATTTTAAGTTATACAAGGGAAAGATGCCGGCTAG	630646	-	TTGACTCAC		TC		RR-YY		2.29966	1.42578	YKR097W	PCK1
Peak_357	11	664399	664672	ATACAGATAATGTCTCACTCGTGCAGTCACATCTCCATTGAAAGCTGTGGAGTTTTTCCAGACACCAGTAGCAGCGCCAATGGCAGCACTACAGCGAAAGTTGAACTCATAGCACATCCCTGAATCGTGGACAGTTAATGTATGTTGTTGTGACTCAGACGATAACGATAAGCCTCAAAAAGTTGTGTCCTCTCATCATCCTCGAGCACCAGTATATCATAAGCAAAGAATCTTCGATAATGATTTGGAAAAAAAGCGAAAGCGAAGCCAATGT	664552	-	GTGACTCAG		GG		RR-YY		2.98017	1.08348	YKR106W	YKR106W	G-SELEX
Peak_358	12	22765	23039	CTTCGAGAAATTCTGCAACCCATTGTGATATGATGCCTGGCCGAAAGATTTCTTCATTTCTTCGGAGCAGGTTCGGCCCGAAATCCTCATGATCGAGCCGAATGCCAAGAAGTAAAACACCAGGATGACTAACCAGTTATTATCATGTGTATACAGTACTTTGGTACCTTTATCAAGAAGTATACTAAAATATACCAACACCACACACATGCACATGGTAGCTGAGCGAACAGTTTCGAGATTTCAGCATTAATTTCATCTAATAAGACTTTCCG	-	-							-	1.25187	YLL058W	YLL058W	G-SELEX
Peak_359	12	38693	39103	GACAAAAATATGATGTTCGCCAATGTGTATCCAAAAATGATCCATGCCTCCAAGGAATTCGGCATCAGTCCCGTAAAGACTTCCACGTTTAGAAACTTGAAGTGATTAGCGTGCTTATCTACTAAAAACGTAGGCAACACAAAATGGCCCCGAATATAATTGACGAACCGGCTTGCAAATAGCGCTCGATTCAGGCCGTTATAGTGACTCATATGGAAGAAGACGGCGATAATACCCACTATGACGAAGTAGTAAGTTAAATATGCACCATAAACACTGCTGATATCTAAATTATAGGCATGCGCATGAAAAGCTCGTATCCATCTAGATCTTGTCTCACGATCGACTCGAATGGATGTCGATAAACTTTCAATAGAACCATAGTCTTCCAAAGCGTGA…	38900	-	GTGACTCAT		GT		RY		9.57409	1.19227	YLL051C	FRE6	G-SELEX
Peak_360	12	46433	46717	TGTTTATATTAGCTGCTAAATTGTTTATTCTATTTAAAACGTGTAGTAAGGAAAAGGCCTGCTCTGTAGTTAATATATTCTTATCTGAAAATTTTATATACTTCATTAGTCACAACGTACGTTCTTTGCAGATGCGCACACAAAAAAAAAAGGGCACCAAAATAAAGGAGGATGCGAAGGTATGACACATTTTCTGGATACCTTTACTGGCTAACTATTGGTTGTGATATTTTGCAGAGATGATGAGAAGTCAAAGCAAGTATACTAGCTATTTTTTTTTTTTAA	-	-							-	2.25458	YLL048C	YBT1	G-SELEX
Peak_361	12	69075	69366	CGCGTTTTTAATTCTAATCATACGGGCTTGTTAGAAGCAGGTCATTTATATCGGGATGTTAATTATCTATGGAAACCTAAAGAACCTTACTTTCCATTAAACGAGAGAACAACGTATCATTTATTACATGAGTCAGACCGAATTCAATCTTTATCCGTGCCGGGATATTGGTCAACTCCGTTAGAGAAGTTATATTTGAGTCACAAGAACGCTGCGTATGATACAAGAATCATGGTGATTGGTGGTAAAAACTCTGGGAAGTCTACATTCTTGAGGCTTTTATTGGAAAAAT	69206	69274	ATGAGTCAG	TTGAGTCAC	CT	GA	RR-YY	RR-YY	2.65165	0.870426	YLL035W	GRC3	G-SELEX
Peak_362	12	86850	87243	TTTTCCCATTTTTTTCCTCCAAGACTCCTCTTATGTGGTTGTTATGTATAGCCCATAGTTACTAAATAAAACACTAATTAATGATTAATAATCCCTCTCTAATAAGAAATAGATAAAAGCTATTGTTCTTCTCATCGCCGGTTCTCGGCGTTGTCCGTACCCTTGGCCGAAACTCGGGCGGGGGCTTATTAGTCATACCCTCAGATTTCATTGGTCAGATAACAGTCACCCGGTAAATGCCCGTTTAATGACTTCTTTATTTTGGATTAAAATTGACAGGGAATTTCAACGGAATAAAGGAAAGAGATTGAGATGCTTTTAATTCATAAAGGAAAGGGAAAGAGGACAGGAAAGCAAGGAAGAGTAATGGAATTTTGCAAATATTTGTAAATCC	-	-							-	2.49064	YLL027W	ISA1	G-SELEX
Peak_363	12	91526	91975	AGTCCACTGGACGTCAAATCTTTTTTTATTGTATTTGGGACATATGGCGTTGATAACTAAAGTTTAAAGGAAGTAATAAGTGAAGGTTAAATCTGGACCTCTTTACTTTCATATTAGAAGTATAAAACACACGCGGATTGGTCCATTATTAGAATACGGGTACTACAATAATGGTTTTGATAGTTACTGTACATTTGAATGTAGCGACTCATATGACTCATATATATGACTACCAAATCATGTTAAAATTAGTATATCTTTAACTTAGACTTCAGTACTATCTGAACTGCACGTTTAAATTTTTACCATAGCAGTTCATGTAATATTAATAATCACTTGTGCCAATATAATGTTACAGCGAACATTTTTCCATGCGCTTGGAAAATTGAATGATAGAAA…	91742	-	ATGACTCAT		AT		RY		20.8729	0.620621	YLL025W	PAU17	G-SELEX
Peak_364	12	103153	103609	ATCCTATAGCAAAAGAAGAAATGGATTCAAAACCAAAACTATCCAATAAATTTATCACTTCAATGAATGATGTGTCCACAGATGATTCAAGCTCTGATGGTAACGAAAATGACGATGCAGACGATGATGATGATTTTACCTATATGGCATTGAAACAAACAATGAAGAGAGAAGGTTCAAAAATTGAAAAAAATAATGACAGCAAACTACCTGCAAATATAGTGGAACTTGATTTACATGAGTCACCGGAGTCCGTGAAGATTGAATCTCCTGAATCGATAAAGGAAATCACGTCATCTGAAATGTCTTCAGAAATGCCAAGTAGTTCGCTGCCTAAGAGATTAGTAGAGGATGTTGAGCCTTCAGAAATGCCAGAGAAGGGCGCATCTGTAGAATCAG…	103394	-	ATGAGTCAC		GT		RY		9.64448	0.811439	YLL021W	SPA2	G-SELEX
Peak_365	12	198010	198416	GCCCGTACCTTTGCTTAATACCAAAAAGGGCATCAGGGGGCAGCAATTCGATGTTATTGAACAGAGTGGCAGACATTATCGCTCTTGTGTTCTTGTATTCCTGTGTTCTTTTGTTCATTAGAATTTGGACGGTTGCGCTTTCCCTTCTTAAAGTATCCACATACGTTTATATACCGACGTGCAAGGCGACAAGGTAAATGAGGCCGATCACGCTGACTCACTCGGTCCGACTCTCGGCGATCGTTATTCACGAAGACGAAAGATAGCCATTTCCAGTGGTGACCATTAGTATTGACAATATGTACATCGCATTAAACAGTAAGAAAACATTAATATTCCGTCAGGAATTCCTGTAAATTGCTCTTACTACAAACCTGCAATGCCCATATCATCATATTC…	198226	-	CTGACTCAC		CC		RR-YY		13.575	2.60067	YLR027C	AAT2	G-SELEX
Peak_366	12	204781	205242	AATAAGTAGTTAAATTTTCATAAATTATTACTTTCTTACATGTTAGTTGGCGCGTCGTCTGGCTGAAAATTTTACGCGTCATAAACCCTTAACTTTTCCACACATTATTCCTTACTGCTAAGCGCATTGCTCACTTGAAAGTAAATTATCTACAAAGTTACATTATCAAAAGGCCTTAGAAACACACCTAAAGTCTTACAGTATCACAATATGAGTCATATTGAACAGGAAGAAAGGAAGAGGTTTTTTAACGATGACCTTGACACTTCAGAAACATCGTTAAACTTCAAATCTGAGAATAAAGAGTCGTTTTTATTTGCAAATAGTCATAATGATGATGATGATGATGTTGTTGTATCAGTGAGTGATACAACAGAAGGAGAGGGAGACCGATCTATT…	204995	-	ATGAGTCAT		AT		RY		22.0462	1.06127	YLR032W	RAD5	G-SELEX
Peak_367	12	205440	205844	CCATCCTAAAAGAAGAAGAATATACGGGTTCAGAAACCAAACACGATTAGAAGATAAAGTTACTTGGAAAAGATTTATAGGTGCTTTGCAAGTCACTGGTATGGCTACCAGACCCACCGTCAGGCCCTTGAAGTACGGCTCTCAGATGAAGCTAAAGAGATCAAGTGAAGAGATTTCTGCTACTAAAGTATATGACTCACGTGGTAGAAAGAAAGCGTCCATGGCTAGTTTGGTAAGAATTTTTGATATCCAATATGATAGAGAAATTGGCAGAGTTTCGGAAGACATTGCTCAAATACTATACCCTCTTTTAAGTTCACACGAAATAAGTTTTGAAGTTACATTGATTTTTTGTGATAATAAACGGTTGAGTATAGGTGATAGCTTTATTCTACAATT…	205635	-	ATGACTCAC		AC		RY		9.32769	1.06127	YLR032W	RAD5	G-SELEX
Peak_368	12	254563	255033	GGGTTTTTGCAATCCATCTCGTACCACATCTACCCATTGATTCTGCCATTACACAAGGTTTCTTATTTGATTCTGTTCACTTTTGTTAACTTTTGGACTGTTATGATTCATGACGGTCAATACCTATCAAACAATCCTGCCGTCAACGGTACTGCCTGCCACACGGTTCACCATCTATATTTCAACTACAACTACGGTCAATTCACCACTCTGTGGGACAGACTAGGGGGTTCTTACCGTAGACCAGATGACTCATTGTTTGATCCTAAGTTAAGAGATGCTAAGGAGACCTGGGACGCTCAAGTTAAGGAAGTTGAACATTTCATCAAGGAGGTCGAAGGTGATGATAATGATAGAATCTATGAAAACGACCCAAATACCAAGAAGAACAACTGAATA…	254814	-	ATGACTCAT		AT		RY		15.8747	1.26189	YLR057W	YLR057W	G-SELEX
Peak_369	12	370488	370735	TTTTTTTTTTTTTGGTGGCGTTTTATTTCTTTCCCGCTTTCTGGGACTTGTGCGGAGTTTTGAGAGGGGCGCGCGGCAAAGGATTCCCAAAACGGAAATCAGACGCCAATAGCCAGCACTCAAAGCAGTTCTGGACCCATTCCGATTTTCCCATTTGGTTCTTGCGCGTGCTGATTCCGACACGCGCGTCTATAAATAGCATGAAGTATCCGCACACCGCAGCGTTAGTGAGGTGAGGGTGGCAGCAA	-	-							-	0.755393	YLR110C	CCW12
Peak_370	12	374043	374342	CCTAAACGTTCATAAAACACATATGAAACAACCTTATAACAAAACGAACAACATGAGACAAAACCCGTCCTTCCCTAGCTGAACTACCCAAAAGTATAAATGCCTGAACAATTAGTTTAGATCCGAGATTCCGCGCTTCCACCACTTAGTATGATTCATATTTTATATAATATATAAGATAAGTAACATCCGTGAGTTAATCTGATAAACCGTTTTGACAACTGGTAACTTCCCTAAGACTGTTTATATTAGGATTGTCAAGACACTCCGGTATTACTCGAGCCCGTAATAAAACAAAAA	-	-							-	0.95339	YLR113W	HOG1	G-SELEX
Peak_371	12	404024	404498	AGTATCTACGGAGTCATCCCTCGCTATAAGATCAACCATACTTTCGAATATGCAGTGTCACTTGGAAACGCCTGCAATGTTTTCTTTGGTTGATGCACCGTTGTATTTTCGGAGATCAACTTTAGCTTTCTTCCGGTCTAACCAACAGGGTGTATGATTCAATAAACAGTATCATCATATATAGTGGGTTTTAGATCGTGTCTCCCAAAAGGTTGCGTCATTTAAAATCGTCACACTGTGTTTTACCAAAGGATGTGTGAAGCTGGTTTGTAGTAGTTAAAGGGCAATGTACCCTAAAGGTTGTGAAAAATTTTCATTTTCGAGAAGGAGTCGCATATAACCTTTAGGGTTATGTCCCTATAAACGATGACTATTGCCTTTTTTGGCCCTTAAGACTAC…	-	-							-	1.09825	YLR130C	ZRT2	G-SELEX
Peak_372	12	444579	445091	ATGGAAACAATATCGAACTTAGCTACCAAATAGCCAACAAGCATAATGGTGTAAATTTTAAATATAGGTTTTAATGCAATGTAAATAGCGGCACCCAGAGAAAGGGACATCTTGGTTCATTTATTGTAGTACTAGAAAATCGTTTCCACCATATAAAAATGATAGACCTTGATCAGACACATGTAGAATTACCGATAGAAGAAATACTATATGAGTACTGTAACTTGTTTTACCTCTTATACGTTACACACTTTGATGTAAATATGACTCACCTTATGTACCAGACATTGACCCAAAAATACAGATATACAAAAGGTGAAAAAAGATATAGTAGTTCCTCGACGTATGCCTACGGGGAAAACAATATAGATGGAATTCTATAACACCGACAGTGATGTT…	444846	-	ATGACTCAC		AC		RY		25.8829	4.33968	YLR152C	YLR152C	G-SELEX
Peak_373	12	499808	500260	TCTCGCAAAACCTTTGAACTGACCAATCTTCCATCTTATTACACAGCTTTCTAATGGATCCATATGCTGTAATTTGGGCTTCCTGCTGGAAAAGTGTTTTATTAGCCGAGTCATCGGGATGCGGGCTATATGTTACAGTTTCGTAGACTTTTAATAGATTGCACATCGTTAAATTACAGCTTCTCATGGTCAAGCTCTTTTTATTTAAGTCTACCACAGAAACTTCTCTGACATGACTCATATTGGTCCCTCCTAGCATCATCATGATCCATTTGGGAACACCTTGTTTTACAGTAATCAACCGTTCAGTAACTAAGACCTTACCTTGATCCTTCAATTCTCTTCTTAAAACGTCCACTGCGATGACATGTGTAGATATTTCATTTGGGTATTTTTTCC…	500044	-	ATGACTCAT		AT		RY		13.0118	1.04408	YLR168C	YLR168C	G-SELEX
Peak_374	12	540436	540730	ACATGGGGGGAGTATGGATTGGGGTATCTATTAAAAAAGGCGCGTGAAACAGAGGCAAAATCGGTAGGAAATATATGTGTGCTTTTGTGTAAAAGGACCATTGCAACTCTTAAGGATATCTTACCGCCGTCTCAGAAGCCAGACAATACTTATTGAATATGATTACTCATCCATCTGTCATATATATTTTTTTTTTCTAGCTTATTATCCAGGGAGAGCGAGAAATACTGCGGAGTTTTTCACCCGAAAGAAAAAAAATACGCAAGCACGATGATAACAATAGTTATATTATTGG	-	-							-	1.70398	YLR193C	UPS1	G-SELEX
Peak_375	12	585113	585537	ATTTTCACTCTCTTCGCCATCTGTTACAGCTTGGTAATCGGATGACTCTGTGCCCTCGTCGTCATTGTCTATTTGCCTTTGTATAAGTTTACTTTTTTTTCCTTGGGAATTATTTGAAATGTTCTTTGCTTTTCTTTTAATTTTATGTGGGTTTGTACTTTTGTTTTTATCAGAATCAGATACGTCACTCAAGGATGACTCAGAAGAGTATATAAGGCTAAATCTTCTTGGCCTCGTTGTACTCAGTGTGGGTGGTGATTGCCTGGACTTTGTATCGGATTCGCCCTTTTTTATGAGCCTTTTAATATTTGCTGGCAGTTTACCAGAATGTGTACTATGATTGATCGTACTTTTTCGAGGACTTTTTTTGCCTGCCATTTCGTTCTGTTTCCAGTTTGC…	585311	-	ATGACTCAG		AG		RR-YY		6.14807	0.659782	YLR223C	IFH1	G-SELEX
Peak_376	12	676737	677132	ATTTATCAATATCATTTAAACCCAAACTTATGCACCCCTGGCATAGCTCGTTGATTAAGTCAACGCCTTGAGTCGCATCCCATACACCGTCCGTGCAATTTATCATTACACTAATATAGGACAATAAGAAAAATTGTAGTTTTTCCACGAAATTTGAGCTCGATGATGACAAGGACGCTGCACTTAAAGTGTGAAGGAAATGACTCACGGAAGAAGGGATATCTTGGTTATAATAGCCCAAGCAAAGAATTTGAAGTACAATGCCAAGATTATACTTATCTTTTGCATTACCTTGCAAATCGAGGAGGATGACTAGGTTCTTGTCCGTGGTATCTCTAATAAAAAGTCTGTCCAAGAGGGACAGAATATCGTCTTGGTTGAAGATATGCAATATGC	676940	-	ATGACTCAC		AC		RY		5.69048	1.22308	YLR266C	PDR8
Peak_377	12	677817	678067	ACGCGGAAAGGCGCCGCATTGCACCTTGTCGTGATGTATTCTAAGTACAAGTAGTAAAGAAGTAATGACCCTGTTGTTATTGCTCCACTGCTGACCGCTGTTAATGCCTCTTCATGATTTCTGAGTCATTGTTGTACCCTCTGGCGAATAAGCCACTGTTGGTTTTGTGTGCATGTTGGAAAGGCGTTGCAACGGACTGTAACTCCACACACGAAAGAACCCTTAATTTTCAGCCGCTCGTTATTTTATTC	677941	-	CTGAGTCAT		AG		RR-YY		3.08577	1.22308	YLR266C	PDR8	G-SELEX
Peak_378	12	721893	722267	GGATTCGAATATAAAAAGATGAGAGGAAGAAAGCCAAAAATAATGATCTTGTTCAGCTTGTGGTTCTGTTTGTTTTTTCTTCGACAAGGAGGATGCTATGAAAAGTTCAATGACTTTCTTTGGTTTCCTCAGCATCATCCAAAACTAGCCAATCCTCTTCAATTGGCTCTGACTCACCCTCTTCAGACTCTTTAGCAACATGAGCAGTTTCTACATTTTGCTCGGTGTAAGCCTTTAAAGCCTCTGGGCCTTGAAGTTCCAATTCTGGTAGATTTGGTTTTTGTGGTGGGTTCCAAGGCTTAACATTACCTTCAGCATCTTGCAAGGTACTTGGAGCCAGTTTGGTGTCTTTTAGTTCCCTCAAATACAAATCTT	722065	-	CTGACTCAC		CC		RR-YY		5.13903	0.722289	YLR295C	ATP14	G-SELEX
Peak_379	12	742771	743041	CAACGTTTGTAAAACTTTCAAAAAGCTCGCTTTCTGTATCTTCTATAAACGGAATTAAACATAGCGTTTGTAGGTAGTGGGCTCGAGTATCAAAAGAAAATCTTGCACGGTTGTCTGTAGATAGGTCGAGAATATGTGACTCAGAACAAAATTGCAGGGAAATTTTACACATGTCTGTAAAAAACTGTTTATTGCTTCTTACGTTGAAAAAAAAGTCATCAATACACTTCGTATCATCGTTTTCATCGGCTACTTCTTGATCAAATTTGTA	742910	-	GTGACTCAG		GG		RR-YY		2.82764	0.886086	YLR305C	STT4	G-SELEX
Peak_380	12	783738	784131	CACGGTGTAGGCCTTCTTCCCGCACAATCCGATGAAACCCCACAATCGCCTCCGTCTCTTCCACTGTGCACGGCGCTAGCTCAACATCTTCCCCGCCACATTTACTGTGGCAAAGAAGGTGCATAATCTAAAAAAACATACGTATGAGAATGGAAAGGGCAAGATAATATCGGACCGTAGTGAGTCACTTGCTTTTGGTATTGCAACCAACTGCCGCCCCTCTTCCCGCTCTTGCACCAAAACGCTAAATGCCCATTGTGATGGCTCATCCACCCTCACGACGAAGTAAGACCCGGGGCACAAGAAAATACGAGATCATAACAGTTCGAGTCCGTTTATTGTGTGCGGTTTTGGTACGCTTTTTCGTGAGGTGTACTACCATTCATGAGAGTCG	783921	-	GTGAGTCAC		GC		RY		4.74011	2.30122	YLR327C	TMA10	G-SELEX
Peak_381	12	790730	791076	TGCATATCGACGATACGCGCACAATTTTTCGTGCAATCATCATCTTCGAATTCTTCAGCAGTATCTACTGCACGTTCTTCCGTAAGTAGAGTTAGTTCTTCAAGTTCCATTTTGTCATCCAGTATGGTTTCTTCCTCAAGTGCTGACTCATCTTCCCTTACTTCATCGACATCAAGTAGGTCCCTCGTGTCACATACGAGTTCGTCTACCAGCATTGCCTCCATATCGTTCACATCATTCAGTTTCTCATCAGATTCAAGCACCAGCAGCTCTTCCTCTGCTTCTTCAGATTCTTCATCCTCCTCATCCTTTTCCATCTCTTCGACATCCGCAACTTCTGAATCATC	790876	-	CTGACTCAT		CT		RR-YY		3.89534	1.448	YLR332W	MID2	G-SELEX
Peak_382	12	793638	793987	AACGAACAGAGTGAGTAACATGAGATAAAACTCCGCCTTCCTTGGCTGACCCACCCAAACATATAAATGCCTGAACAATTAATTTGGATCCGAGGTTCCGCGCTTCCACCATTTAGTATGAATCATATTTATGTAGTATATAGGATAAGTAACATTTCGTAAATCAAGCTGATAATCCATTTTGACAACTGGTCACTTCCTCAAGACTGCTTATATTAGGATTGTCAAACCACCTTACTATGAATTGCGTTTTGACACAGGAAACGCTAATGTAATATAATCCGTGATAGTTTAATGGTCAGAATGGGCGCTTGTCGCGTGCCAGATCGGGGTTCAATTCCCCGTCGCGG	-	-							-	0.885521	YLR333C	RPS25B	G-SELEX
Peak_383	12	819303	819589	AGTATCAGAATGGCTAAACAATCATTAGGTATGTGCACAAATGCTAAATCACTGAAACCCTGTAGAGCTGGAATTGAAAATATAGTTTGTACCTTTTGCCTGAGGGCAGAATGACTCAATGTTATCTTAATTCGATTAGAAAAAGAAGGTGCGTTATCCAAGGTTGAAACTTGTAAACTATTTAGGTGATGTCTCATAACTGCAACCACTGGAAAATGACGCAAATATCAAAATAATAGGGAGATAAAGTCTCACGACATGAAAAAATCATAGAATTATTGTTCAAT	819417	-	ATGACTCAA		AA		RR-YY		3.10923	0.983521	YLR344W	RPL26A	G-SELEX
Peak_384	12	838115	839034	ATTTCCATGTTTCTGATGGTGTCTAATTCCTTTTCTAGCTTTTCTCTGTAGTCAGGTTGAGAGTTGAATTCCAAAGATCTCTTGGTTTCGGTACCGTTCTTGGTAGATTCGTACAAGTCTTGGAAAACAGGCTTCAAAGCATTCTTGAAGATTGGGTACCAGTCCAAAGCACCTCTTCTGGCGGTGGTGGAACAAGCATCGTACATGTAATCCATACCGTACTTACCGATCAATGGGTATAGAGATTGGGTAGCTTCTTCGACGGTTTCGTTGAAAGCTTCAGATGGGGAGTGACCGTTTTCTCTCAAGACGTCGTATTGAGCCAAGAACATACCGTGGATACCACCCATTAAACAACCTCTTTCACCGTACAAGTCAGAGTTGACTTCTCTTTCGAAA…	838712	-	GTGAGTCAA		TC		RR-YY		2.40525	1.66256	YLR355C	ILV5
Peak_385	12	839314	839785	GTCTATATGTTTTTGTCTTGCTTCTATAATTGTAACAAACAAGGAAAGGGAAAATACTGGGTGTAAAAGCCATTGAGTCAAGTTAGGTCATCCCTTTTATACAAAATTTTTCAATTTTTTTTCCAAGATTCTTGTACGATTAATTATTTTTTTTTTGCGTCCTACAGCGTGATGAAAATTTCGCCTGCTGCAAGATGAGCGGGAACGGGCGAAATGTGCACGCGCACAACTTACGAAACGCGGATGAGTCACTGACAGCCACCGCAGAGGTTCTGACTCCTACTGAGCTCTATTGGAGGTGGCAGAACCGGTACCGGAGGAGACCGCTATAACCGGTTTGAATTTATTGTCACAGTGTCACATCAGCGGCAACTCAGAAGTTTGACAGCAAGCAAGTTC…	839390	839561	TTGAGTCAA	ATGAGTCAC	TA	GT	YR	RY	33.568	1.66256	YLR355C	ILV5	G-SELEX
Peak_386	12	914945	915357	TTGTATATTGTTCGCATATTAGTTTATGTGATGAGGCAATATAAAATTTTCTTACAATAGTCCGCCCGTTGCTTACATGAAAGAAAAAAAAAATAAAGATGGATCGAAGTGGACTTAAAAACTATGTATACGTGTGTGTGTGTGTGTGCAATAAGAGTTCGAAAACATTAACTTTTATAAACATGACTCACATTGAGAATAAATGAGCTCTCTATAAATACAAACTTGCGGCGAAAACAATATCTCTCTTAATCAACTCTTGAGCCCTGCTCATCTTCATATGTAATGTGGAATTACCAATAATAATAGAGGCAGTCTTAACTTCGCGGCAAATTTCGTCTAGCCAAGTGATAACTCTGACTACAGTACCTTCAGCCTCGGGGCTCATTTCCATGATTT…	915131	-	ATGACTCAC		AC		RY		8.21306	0.640176	YLR397C	AFG2	G-SELEX
Peak_387	12	988801	989087	TCGAAAGGGAAAAAAGTAGGTCCTCTTCAAGTAAGAAATCGAATAGGAGACGCGATGAGCACGTACATTTACACGGTGACACATTTGTTAATGTTAATTACCGTCTTTTGGTAGATGATCGTTTTGACTACCCAGAGCAAAACTGTAACCCGAACGTTCCTGTCGATCAAGAAAAGATTCTAAGAGTCATAGTGCCAAAGGGTCAGAATTGTTCTATTTGTCTGAGCGAGGAACCGGTGGCTCCCAGAATGGTTACTTGTGGCCATATTTTCTGTCTAAGTTGTCTC	-	-							-	0.989606	YLR427W	MAG2	G-SELEX
Peak_388	12	1005831	1006066	CATCACTTGGTATCTTTCCTGTTATGGCAGGTACAGAAGCGATAGGTCGGTCCTTAGTAGAAATTACTTTACCGTTTTCTAATTCGTATTTTGTTAAATCTTTTTTCCGGTCAACCTTTATGTAAGAGTCATTAGGTTTAATGATTTTGATGCGTGAAGAATTCAAGTCTTTCGACATTGGCGTTGAGAGTGTTTTATGGCAGCTGAGCTAATACGTCAAAAAAAAAAGAATCTAA	-	-							-	1.02617	YLR433C	CNA1	G-SELEX
Peak_389	12	1035473	1035900	TATTGAAGTTGGTACGATTGGCGGGGGTACTGTTCTGGAGCCTCAGGGCGCCATGCTTGATCTTCTCGGCGTTCGTGGTCCTCACCCCACTGAACCTGGAGCAAATGCTAGGCAATTAGCTAGAATAATCGCGTGTGCTGTCTTGGCTGGTGAACTGTCTCTGTGCTCCGCACTTGCTGCCGGTCACCTGGTACAAAGCCATATGACTCACAACCGTAAAACAAACAAAGCCAATGAACTGCCACAACCAAGTAACAAAGGGCCCCCCTGTAAAACCTCAGCATTATTATAACTCTTGTAGTTTACATGGTGATACTTTATATCTTTGTATTGTCTAGCTATTCTAAATCATCTGCATGTAATAAGAAGTTGATCAAAATGACTCGCTGCGTAAAACCT…	1035679	-	ATGACTCAC		AC		RY		12.0263	1.66486	YLR451W	LEU3	G-SELEX
Peak_390	12	1059051	1059336	GTAGATAGAAGATGGAATCAGTTACGAAGTGATGAGTTCCCATACATTCCAGCCTGTTTACATTAGCTAATTTAAAAAAAAAAAACATAATTAGAATATTACGTGATGACTCAGTTTAAACGGTACTCTGTAACACATCATTTCTATTTGTTGTTCTAAAACAGGTTCTACATATTTGGATCTGCTGTGAGAATGACCTAAAAGGTAAAACTCTCTTTGTAATAATCCAAGGAAAGTGGGAGTTCCTTGGGGAAGCTCTATTGCAATATATTGTAGTTTCCATTCA	1059160	-	ATGACTCAG		AG		RR-YY		3.77801	0.74096	YLR459W	GAB1	G-SELEX
Peak_391	13	37752	38013	TCCGATTTCTTTGTATAAACTAAATAATATAGTGATTACTAATGGAATGGCGGTATTATGCACCTAACCTGTTCATTCTGCCACAGATTACGTAAGCGATTTATTGCCGGCACTTGTTGTCTTAATGACCGAGTCACCAATGTGGAACGATAATTTTCTCTGACTCAAACCTGTTAATTTTTTTCTACTTCGTTTCGTTAGCGACGACGTCAAGCCGCAGGATCCTGTCTGCCTTGACCTCTTCTCTACCTTCAGAACTTAC	37915	-	CTGACTCAA		CA		YR		2.65165	2.04268	YML116W	ATR1	G-SELEX
Peak_392	13	115422	115780	AATTGACTTTCCGCTTCATTGCTCCTACATTTATCGGATGGCGCACATAGCTAAAAAAGGAAGATTTTCACTCATAAGGGAAAGGAACCGCATGACTCAAGAGAAGCATGTGGTTTTTGAGTTTTTTTCGTTGAATTTTCAGGTAAAGCTCAATAGTTATGACAATTACAACAACAGAATTCTTTCTATATATGCACGAACTTGTAATATGGAAGAAATTATGACGTACAAACTATAAAGTAAATATTTTACGTAACACATGGTGCTGTTGTGCTTCTTTTTCAAGAGAATACCAATGACGTATGACTAAGTTTAGGATTTAATGCAGGTGACGGACCCATCTTTCAAACGATTTATAT	115517	-	ATGACTCAA		AA		RR-YY		1.97114	1.56127	YML076C	WAR1	G-SELEX
Peak_393	13	223353	223749	GTTACCATCGACATTGGTGTTCAACAAACTGATTGTAATGGGCGCACAAAAAATTGTACATCTTATTGTTAGTAATTTATTTCACACCACTGCTAGGTTCTTCGAGAAATTTTCAACATGGCGCATCATTTTGGAATGGCGTACGAACATGGAGGGACGATAAATATGAATTTGTCAAGCTGTATTGACTGAAATTTTTAAATTCGCATTGAGTCATATATTGTATTTTCCAATAAACTGTGTATTACTTTAAAATCTAGTGATAATTTTTATAGTAGCGTAGAGTTAATTCGGCCTCGTATTTGGTAACCCGTGACGTTTATTATTCCATCGGAGTGCACTCACATATTTTCAATCGCAATATTAAGCTATTATCCCATGTAATGTGAAACTCTCT	223565	-	TTGAGTCAT		AA		RR-YY		3.954	0.993849	YML026C	RPS18B	G-SELEX
Peak_394	13	238500	238957	TTTCAAACCAGCAAGTGGGTTCCTTGGCCAAGGTAATAATGATTCTATAAGGAACAATGGACGCGGTAACTATAACAGCAGCGGTATGAATGGAGGTTCGAGAGGAAGAGGATTTGGCAGAGGAAGGGGATTTGGCAGAGGCGCATATAACAATCGAGGTAGTCGTGGTGGACGTGGAAGCAGCGGTAACTACTCCAACTACAATAACAGAACAACAGACATGCCTTTATGAGTCATGTACTGACCCATTAATTTTCTTTTCTCTTTTTTTTTTTTTTTTTTTTTTTTCCTCTATTTCCTTTTTTTGTTCTAGTCGGTTACGCAGTTCTGAGTAATGTAATATAGCGTTCCTTTTCCTCTCAGATTTTTTTGACCTTATTTTGTTTCCACTTTTTACTA…	238732	-	ATGAGTCAT		AT		RY		11.0524	1.5424	YML017W	PSP2	G-SELEX
Peak_395	13	260625	260846	ATCGTTTAATCACCCAATCTGGCAAAAAGCATTCCAACTGAAACTCTTCGATCCAAATGAGTATTATCGTGAGCTGCTATGTTTCCTTTCGCCCGGCAAACCAAGTAAAGGCACGAGTCTTCATCCTAACAATCGACTACTGACTCATCTGGCCATAAATAACCCTATCACAGAGGCAGATGTATTGCGAAGACCGTTCAATATCCAACCGCTTTATGGCAA	260768	-	CTGACTCAT		CT		RR-YY		2.68685	0.945968	YML005W	TRM12	G-SELEX
Peak_396	13	304320	304650	GTTTTTTCATCCTCCCACATTGTTGTTGTTACTCTTGGCCTTATTATACTTGCCGAAGTGCCGCTGGTGTTACTGCCTGTGGCATTGGTAGTGGCGATTAAGGGCATCGGGTGCCTTATGGTAGTTGTTTGGAAAGAATTCATGGTTTTAGCCATTGAGTCATACTGTTGATCTGACACTCCGTGCCTATTTGCAGTTAAATAAGTTTCTTGATCAGTAGAGGGTTTAACTGGTGGAGTTATAGAATTTCCATCATACAACGGGCTCACCTGTTGTTGTTGCTGAGGCGGTAGCAAACCCACTTGCGGAAGATTGTAGCTTAAAGGTCCAT	304478	-	TTGAGTCAT		AA		RR-YY		3.35562	0.727607	YMR016C	SOK2	G-SELEX
Peak_397	13	306597	306818	CGATTTTTCAACAAGGTCTAGATTTGCTAAGACGATGAGGCGGAGCCCGAAACAAACAAGCCAAAAACCGGAATTTCGCGCTTGGTGTGCTTTCGCATCTTTTCGTGTGGTGAATGCACCTGGTGCACGCTGCGAAGGTGACGTAGCAATCCAAAAAAGGGAAGTCTAGGCGCTTTCAACCGCCCCCCACCGTGCATGCGGATTGGTTGTCACAATTCGCAG	-	-							-	1.56347	YMR017W	SPO20
Peak_398	13	311944	312269	GCGCAAGTGCATATTTCTGAGTTTACTATGTGCTTCGTCTGAAACCTCTCATTATCTACTTAATATCGGCTATTCATCTCACGTATTCACGTAATATTTGATTTTTGTACTACTATTTCTCTCTGTCATACGTGCATGATACATTTCCTTGTTCAAATTAAAAGAGTCACCGTCAGCCTCTCAAAACAAAGAAAAAAGATACCCGGCTGAACATGAGTATCAATCATGAAATATATTATATACTTGTATTTGAGCATCGTTCAGTAGCAATCAAGCTCATCATCGTAGTGATTGTTCTCCTTCAGTTTTTTTTAGCACGAAGTCGG	-	-							-	1.55837	YMR019W	STB4	G-SELEX
Peak_399	13	317518	317835	CACCAATATTGGTTAAAGGAACACCACTTTGTTGAATATAAGAATTCAGTTCCTCTTCGCTTCTATGGATTAGACAATTAACACATGGGCAGCTTTCATCTTCACAAGAGCACTGCGTGCTTAAAAAAATGCCCTTATGAGTCAGGACTTCAACTTTCGAAGCAACGTCGCTTGAATGAGGAGCAGCAATCGTTGTTGTACTTTGTGGGGTGAGTGTTTCTGAACTGTCATGCGCACCAGGAACAGAACTATTGTAGTTTTCTTGTAAAATATCGTTAAAAGCGGACGTAGATTCCAAGGAGCCGTATGGCGTAAATA	317658	-	ATGAGTCAG		CT		RR-YY		3.27349	1.46235	YMR021C	MAC1	G-SELEX
Peak_400	13	361886	362285	TATCTGTATAATCAACAGATAAGATGTCTTTAACCCAGGGGGGTAAGAATTGAGATGGAGCAAATAGTTGAAAGGTGTGACATAAGAAGGTGAGTTCGTCATCAGTCATCTGACGTACGGCTTTTCTTGTTGCTGTCGGAATAATATCACCGAGATTCGAATTTTGTAAAAATTTAATGTATATTTTAACCCAATTGAGAAAGTCATTAGGTGAGGTTAAGATTGGCGGTGGTCTGACATGTTGATTAGTGGATGTCATATTAGACTTTGCTGAGGATGAATCAGGAAATGAATTACCTGACTCAGGTGACGGGGTGTTCAAATGTGTTCCAACATATTGTGGATATTGTGTAAACTGTGATTGTGCCCCAGGTGGAGCGTACATAGGTGACATTTGATA	362187	-	CTGACTCAG		CG		YR		4.24733	1.00359	YMR047C	NUP116	G-SELEX
Peak_401	13	396136	396771	TTTTCGATGTCAAAACTGGCGCAGCTTTGAATTTATTGGTCGTGAAAACAGCTGCTGCGGTTGAAGGACGAGATTTATTGGTATTCAAGATTACACCCAGGTCCAGGCTCCCGTTTTTTTTGACTCCAGATGCAGTGTAGCCTACTTCAAATCCTTTAGGAAAAGAGCCCGTCTTGGGCACGTATAATGCATACTTATCTATAAGCTGCTTCGAGCGTTGAAGCAATGTTGATGATATTCTCATGCTATGTTGAATTTTGGACTTCTTTAAATAAAGGGAATAGAAGTATTGCTGATACTAGCCCAAAAATCGTCACCTTTGTGCGGCGAGCCGAGGATGAGGCTTTTATATACTCGACGACTAAAGAAGTTGGCAACGAATTACGCAGTGAGTCATCC…	396528	-	GTGAGTCAT		AC		RY		35.9615	14.3395	YMR062C	ARG7	G-SELEX
Peak_402	13	402109	402587	TTTTACTGGAGATTTTGAAAAGTTTTAATGAACGGTTTAATGGCATAATCAAACCGAAAGAGTCAATAACAGAAATGGTCACATTCAGCCAACTTGCTCAAGCTTTTGAAGTTGTTAAATTGATACCAGTGCAAGAAATGAAGGAGAAAGGGATTTACTTGGTCGGAAATTTACTTTATGGCACAGGGAAAGTTCGTTTAGATCCTATAAATGAGTCATTCTATATTGAATCCCTACTAGTTTTTGGAAACTATAAGGCTGCATACAGTTTATTTATTACCAATAAAGACAAAGTAAACGAGCGCTGGTGGAATGAACTAGGATTAATGATCACATTAAGGTCTAACCACTTGAGAAACTTCAGGAAACTTTTAGCCGAGACAGATGCAAAGTACTCAA…	402323	-	ATGAGTCAT		AT		RY		15.2294	1.77909	YMR066W	SOV1	G-SELEX
Peak_403	13	440776	441326	CAAGAACACCGATCATTCTAATCAAACAGAACCAACGCCTTCTTTGGCTCAGTATTTAAGGACCTCAAATACCTACCTTTCTCGAAAAAACCAATCGAAACAAGCTGAGCAAGAAAAGTTTCACAAGCCTGAAGCTCCTATGGTTCCTGTAACGAAAGTAGTTACACCAATCAAATCTGCTCTTAAAAAATCGTCAGGATCGTCCAACCATGACTCATCCATGTACTCTGATAACTCTCCCGCCAATGGCGCATACCTGTCTCTTACGACTGCTGAAAATACGAGATTAAATGCTCAAATGACGATGTCCGACAGCGTATCACGCAGAGCAAGTTTAAAACGATCTTCTATAAAAAGACCTCAGTCAGTAGGCCAGTTCAGAAGCATCAGATCAAATTC…	441322	440989	ATGAGTCAA	ATGACTCAT	TT	AT	RR-YY	RY	11.6156	1.12618	YMR087W	YMR087W	G-SELEX
Peak_404	13	457961	458381	CTTTAAGATATGGTTTTTCTTTCTATTTAACGAAATGAAATAATAAGAAAAAAAAACCTGGTGGCATCAACGTGATTTTTGGAAGAAAGAATAAAACATTCAAAGAGTTCGTGACCAGTTATTGCTGATAAATGCCGTTTACTGACTCAGTTGGAATTTATGGCACTAGTTGGAATAGCTCATCATGACATAATGACTCAGCCGACAAGGGTAAGGGTTGAAAGCCGGGCTTTTTCACTACTTTTCAGGTAGCGCCGCCATTTCTTCATGACTCTGACACACTCTGCCGCACCGTTAGTTACGTCTGTAATTCTGGCTGCGAAGTACCATTTTCGATATAAATAGGAGGACGCTGAGAGCTATGGACGAAGTCTATGGTATTGTTGGAGAAACCTTTAG…	458106	458157	CTGACTCAG	ATGACTCAG	CG	AG	YR	RR-YY	7.95494	10.1016	YMR096W	SNZ1	G-SELEX
Peak_405	13	480510	480828	TTATAAGAACTAAATATATAGATTAACTAGAAAAGGCCAGATGTCTTAAGTGTATATATTTTGAATGAGAATTATGTATGCAGCATATTTACTTGAATCTTCAAAAAAAGAAGCCCTGTAGGGGGCTCGAACCCCTAACCTTATGATTAAGAGTCATACGCGCTACCGATTGCGCCAACAAGGCTACTTATTGTTATTTACCGTCAGCTTGTATTCTTATATGTTGAGCTGGTTTTTTATCTCAGCTTTTACTTTCTCAAAGTTAATAAAACTATTCTTCTAGAACTTTTTTTCTGGATTTCGGTTGCTGAACTAGTTC	-	-							-	1.14338	YMR106C	YKU80	G-SELEX
Peak_406	13	504196	504451	ATTTCGATATTTTCAACAGGTACCTTAGTAGAGCTGAAGTTTTTTCAAATTAAACATTTATGTGGTAGTCATATATATGTGTCATGCGAGTCTTTACATTAAATATATGGTAACCACCAGAGAACTTGTTATATTAGTCACGATTAATAATGTTGGAATAAAAATCCACTACCGTCTATCAACTAGTAGTTATATTATCAATATATTATCATAGACGGTGTTAGATGATGATATAAATTATGAGAAGCTGTCATCA	-	-							-	1.26268	YMR119W	ASI1	G-SELEX
Peak_407	13	505751	506041	TCAAAATATTAGGCGACCCTGCTTTTGCCCAAGAAAAATTTTTACTGAATATATTCTACGCTTTCGCTTACTCTTATTGTGTCGAAACCATATTTACCATCATGCGGAATTCCAGCCCTTTGGAGGGCACTGACTATTCATTGTTTGAACTTTCGATTCAGTTTTATACAATGACTAATAATAATACTAAATTTTTAGATTCTCCTGATTACATTATAGACTGTTCTATGGCTATTTTGAGCAGGATATTGATCCATTTGGTGGAGATTTTCAGGCTTAGAAATTATCGTC	-	-							-	1.26268	YMR119W	ASI1	G-SELEX
Peak_408	13	540280	540716	TTCACTCGGAACGGATCCGGACAACAGTCAAATAAACTCCGGGATCCCAAAAAGGGCCGTACACACAAACCCAAGCCGAGCGAAAAACACAAAAAAAATAAAACAGGGAAAAAAGGAGCGCAAGAGAAAACGCACAGGAGTAGGAGCAGCAGAAAGGGGAACTAATATGGTTTTTCCGTTTGCTTATTTTTATTTTTTTGTTGAGTCATGGGCACGTCACCGCACAACAGCCGCCGCAGGCCTGTACCGCTACGCGTCTATCACTGCGAAACATCGCTACTTCTGTCGCCGCGTCGACGCTGGTCCAGACCACAAAAGGATGCACGATCAGAAGCACTGTACCCTGCAGAGTTGGAGATAGTGTAACCGTGACTTCATTTTTCAAGCGTGGTTTCACAT…	540484	-	TTGAGTCAT		AA		RR-YY		11.7799	1.74198	YMR135C	GID8	G-SELEX
Peak_409	13	546221	546548	GATCCGGTGCAGATATCTTTCCCTACCACCGAAGTAGTTGGGCATGGTTCGTTTGGTGTGGTATTTGCCACTGTTATTCAAGAAACTAATGAAAAAGTTGCTATTAAGAAAGTCCTGCAAGATAAACGATTCAAGAACAGAGAGCTGGAAATAATGAAAATGCTGAGTCACATAAATATAATAGATCTGAAGTACTTTTTCTATGAAAGGGACTCCCAAGATGAGATTTATTTAAATTTGATACTAGAATACATGCCACAATCTTTGTACCAGAGGTTACGTCATTTCGTCCATCAACGTACGCCGATGTCAAGATTGGAAATAAAGT	546387	-	CTGAGTCAC		GG		RR-YY		4.0596	1.49932	YMR139W	RIM11
Peak_410	13	554183	554408	GCAACTGGCTGCAGGGAGTATAAGCAACGATTGTAACACTACGGAGTTGGAAATTACGTGCAGTCCTGAAATGGGAAGGACTATTACACACAATCGACCAAATACTAAAGATGAGTCAATTCAGGATTCACATGGGAATAGGACCCTCCAATTGCCCAAAATGAAAAGTTTCAGTACCATAGACGGAAGCATTAAGGATATTAAGTGATCAAAGATACTAGATAAT	554297	-	ATGAGTCAA		TT		RR-YY		2.19406	0.589177	YMR144W	YMR144W	G-SELEX
Peak_411	13	608876	610041	AATTTTCTAATACCTCTATAAATGACAACGACTCCAACAACAACGACTCATATGGTTCTAATAACAACGATTCATATGGTTCTAACAACAATGATTCATATGGCTCTAACAACAATGATTCATATGGCTCCAACAACAATGATTCATATGGCTCTAACAACGATGATTCCTACGGTTCTTCCAACAAGAAGAAGAGCTCTTATGGTTCTAACAATGACGATTCGTACGGCTCCAGCAACAACAATGACTCTTACGGTTCCAACAACAATGACTCTTACGGTTCCAACAACAATGACTCTTACGGTTCCAACAATGACGACTCTTACGGTTCGTCAAACAAGAATAAGAGCTCTTACGGTTCCAACAATGACGATTCTTATGGCTCTAACAATGATGATT…	-	-							-	3.33275	YMR173W	DDR48	G-SELEX
Peak_412	13	637087	637448	TTGTGGATTTCCTCTAACAGTTTGATGCTCGCATTGGTTTGGCACAATCCCAAATTGCTTCAGAATTCTAATCTTATGAAATAACAATCATGTTACCCGGTTGAATCGTTACCCGACATCTCTGACTCTTCTTGAGGTATAGACTCCTCCTTTTCGGAGTCATGACTCTCAGAGGAGTCATCGAAGTCAGCATTGAGCTGTGAAGGACCTTGATAAGCTAGTCGAAAGATCTCCAACGAATATAAATGGATGTATATATAGCAGGCTCGAGTGGCACAATTTTCTTCTCTTCAAGTTCCAGTGAATTAGTCTTTCTCGTGTGTACCAATCTTACTGTATTGATTGCTGCGCGATCTAACCAT	-	-							-	3.13928	YMR189W	GCV2	G-SELEX
Peak_413	13	653390	653861	GCTACTGTGGTGACCACCGTACCAAAGGAGGGGTAATAAGACCCTGTGCCCTTTGCCAGCATACGTGTTACCCCCCTCAAAAAGAGCTGGCTGTTCGAGCTAGCTGCTCTTTCTGTTGCCATTCCCGTACCAAGAGCGCCCCGTAGCTCGATTTTCAGCACCTTGGTGGATATCAGGGGAATTTTACCGCCGCAAGCGATCAGCGTAGAGTGCGCACAGAAAACAGACAGAAATGACTGAAGCGGATGAAAAAAAATTTTCTGGCGCGGCCCAATCTCCGCGGAAGAGTCATTCCGTGAAATGAAAACAAAAGACGCGCATAGTAGGAGAAAGATTATGCAGCTTGATAGCGGGTTATCATACCAGCGTTAATGACACCTTCAAGTGGGTAAAGTACCC…	-	-							-	4.14175	YMR195W	ICY1
Peak_414	13	655639	656032	AATGGCAAAGGATGACGAAAACCCTAGTGAACTGAACTTTCGGCTAACTATACATAATCGAAGTAAAATCGACTCTGGTGAGCTCTACATAGCTCCCCAACTTTTCTTCAGAAATACTTGGGCTTTTGACGGTACTAGAACAAAGGACAAGCCCTTGCTTGAAAGAGATGCAGAAGCAGCGAACTTAATCAATATGACTCACAAGAAATATGGTAATTGCCAAATGGTCTTTCAGCCATCTCCAGGTGGGTTCTCTTCCGGTACAAACGAGGAAGAGGAAGATAAAGAGGTAGAAGATATAGATCCTCTGCTGCTATTTACCGATAATGAGTCCAATTTAGTAAAACTATTTAACGAAGAAAAGAATCCTTCCGAGTACACAAAGGATGCTTTT	655836	-	ATGACTCAC		AC		RY		10.1255	1.56825	YMR196W	YMR196W	G-SELEX
Peak_415	13	667719	668265	TGTCAGAGACGCACTTGCCTCTCATTACGGGGACGAATACATCAACAGGTACGTCAAAGAAGAATGGGTCTTCAACAATGCTGGTGGTGCGATGGGCCAAATGATCATCCTACACGCTTCCGTATCCGAGTACTTAATTCTATTCGGAACCGCTGTTGGTACTGAAGGGCACACAGGTGTTCACTTTGCTGACGACTATTTTACCATCTTACATGGTACGCAAATCGCAGCATTGCCATATGCCACTGAAGCCGAAGTTTACACTCCTGGTATGACTCATCACTTGAAGAAGGGATACGCCAAGCAATACAGCATGCCAGGTGGTTCCTTTGCCCTTGAATTGGCTCAAGGCTGGATTCCATGTATGTTGCCATTCGGGTTTTTGGACACTTTCTCCAG…	667994	-	ATGACTCAT		AT		RY		26.7746	0.947352	YMR203W	TOM40	G-SELEX
Peak_416	13	756396	756648	ATTTTTTTTCTTTTGAAAAATGAGGTTTTCCGAGGGTGTGTGGGTCTATGCCAAGAAATCATATTAGAGTTTTTGTTTCTTTAAGGTTGACCAGCAAAAACAAAAAGGAGTCACCGTTTATGACTTCCGTTATATGACATATATATTTTCGGCGTAGGTAGGGAAAGACAAATGCACTCACTACGCTGCGTCATGAAGAGAAAGTAGCAAGAATTTTTTTTGCTTCCTGGGAAGTAGGCTCAGCTAGTAAAAA	-	-							-	0.784372	YMR243C	ZRC1	G-SELEX
Peak_417	13	766985	767401	GGCGATGGTGAAGTACGGGAAACCGATAAAAATTTGAGTACTTTTTCTTTAGAAGATTTATCGTATGACCATATTGTCCCATCTTCATAGTCATCCAAGGTAGCTAAAAGGTTCAGTATTGATGGGAGAACAGGGCATACTTTTAGAATATTCTTTGACGTAATATGAGTCAACGATTTCAATAGTTTTTTCACCGCTAACTTCATTATATTTTTGTGGGAAGGCATGTAACCTCTTGTATAAAGAACATCAATCAATCGAAGAACTGTTTCGTAGGCATTTGTATTTTGCCCATTTTTTAAGTTAAGTAGTTTCCAGATTGACTCATCAGAAAGAATCACCTTAAGACTGGAAGAATTACGTTCTGAGACGTCTTTGTTATGAACAAAAAGCTTAATC…	767153	767308	ATGAGTCAA	TTGACTCAT	TT	TT	RR-YY	RR-YY	3.82494	1.05436	YMR247C	RKR1	G-SELEX
Peak_418	13	774008	774515	CTCCATGAAATTTTTTTTTTTCTTTCGATTAGCACGCACACACATCACATAGACTGCGTCATAAAAATACACTACGGAAAAACCATAAAGAGCAAAGCGATACCTACTTGGAAGGAAAAGGAGCACGCTTGTAAGGGGGATGGGGGCTAAGAAGTCATTCACTTTCTTTTCCCTTCGCGGTCCGGACCCGGGACCCCTCCTCTCCCCGCACGATTTCTTCCTTTCATATCTTCCTTTTATTCCTATCCCGTTGAAGCAACCGCACTATGACTAAATGGTGCTGGACATCTCCATGGCTGTGACTTGTGTGTATCTCACAGTGGTAACGGCACCGTGGCTCGGAAACGGTTCCTTCGTGACAATTCTAGAACAGGGGCTACAGTCTCGATAATAGAATAA…	-	-							-	3.24598	YMR251W-A	HOR7	G-SELEX
Peak_419	13	780859	781101	TAAATTCTCGAAATTGTTAGTAGAGACGTACGCTTGAACCACTGACATATATAGCTCTTTTCGTGTTGAAATATTATTATTAAGTCTGGTAATAAATTTATCAACTCTTTCCATCAATATTGAGTCATCAATGCTTTTTGTTCTGTCTCCTTTGATGCAATACAGAGAATGACAAAATTCAATCAACTCAAACTGCACACTTGATGTATATCCCGTACTTAAAACAACGGGATTGGTTAAAAA	780982	-	TTGAGTCAT		AA		RR-YY		2.60471	1.09174	YMR257C	PET111	G-SELEX
Peak_420	13	807599	807893	GCGTGACACTTCCTTAGTTCTTAATCTATATAAAAGAGCCTGTGATGGCCTTTTACCCTAGATTAGGAAGCGAAGGGGCCTTTCCCGAAAGGTTATGTATGACTCCCTTGAAATGCATATGATAATTAAAACCAAAAAATGTTATGTGATTCTGAAAGGAAATGCTGTCATGTGAGTCAGGTGTAGAGCAGGTTAGAACAGTTTATATTACATAGTCTGAAAGGCACGTGAGAAAGTGCCATACCATTAGCCGAATACGTGAAATGTCTAAAAAAATACAAGTGAAAGAATAAAG	807774	-	GTGAGTCAG		CC		RR-YY		2.78071	0.906052	YMR271C	URA10	G-SELEX
Peak_421	13	816959	817202	ACCACTCAAGTCTGCACCGTGAATGTCGCGGTTCGTTATGGGTTCTTTTTTCTCTAATCTCTGAAAGATTTTTCTAAGAGCATCCAACCTTTCCTGCACTAGTTTGGTGATATCATTCAGCTGACTCATAGTGGTTCTTTCTCCGACGACATTGGCGTCAAAACCAAAAGGGATTACTCTTAGATTATATTCTCTTTCCTTCATAATATACAGTTTAGAGGCCTTTTGATCTTTACCGACAATC	817083	-	CTGACTCAT		CT		RR-YY		2.68685	0.920275	YMR275C	BUL1	G-SELEX
Peak_422	13	825991	826397	ACCCAGCAGCCAAGGGAAAAGATGCCATCAACCATGCCTGATTGTTTGCTTCTGAATTAAAGGATTTCGAAAGAACGTTCATTATACAGAGAGCGTGTGTTTGGCCCGCTTGATTCAATAACTGTGCCAACATGCATGTCGCTATGAACATTAATTCTTTCCCAAAGGAACTGAAGTAAGTGGGGTCCTGCCATGGTGAGTCATTGGTCACTTGAGTTGATTTGGTTGAAGAAACAATTGTTGTCACCTCTTCATCTTCTGTGGAAACCACTACTTTATCTTTTGCTTTCACTGTAATTTTCTCATCTATCTCAGAGTCCGTGCCCTGCACGCTCGTTTTCTTTTTGAAGATTGAAAACATTTCCAATCAGATCTTTGAGTTGTATGTTTGGTGTGCTT…	826190	-	GTGAGTCAT		AC		RY		7.64988	1.11235	YMR279C	YMR279C	G-SELEX
Peak_423	13	845351	845800	GTCTTTATTTATTCCGCTGACAGATATGCACAACCAATTATCGTCTCTTGAAAGCTTTTTAGACGTGATTGCTGTTATTTGGCACGTTGTTAGTATTTAAGCTTATTCGGGTTTGCATTGATATTTGCCCGAGCAGAAATCTCCTTCTCGATGAGTTAGAACTGAAACATCTCTTCAATTACTTATACATAATAAACATAGAAAGCCAGGACCTGTCATCATGAGTCATCCGATTCAATTTGTAAACGCTAATAATAGCGATAAGAGCCACCAATTAGGCGGTCAATATTCTATTCCTCAGGATTTGAGGGAAAACCTGCAGAAAGAAGCTGCACGTATTGGTGAGAACGAAAAAGATGTGCTACAGGAAAAAATGGAAACTAGGACAGTGCAAAATCG…	845575	-	ATGAGTCAT		AT		RY		14.0209	1.05872	YMR288W	HSH155	G-SELEX
Peak_424	14	28638	28927	CACCTAAAAATAAAAAAATATTAAAACACCAACATGTTGTTGAACAAGTTTTCCAGAGAATTGACCGAATATTTAAATTTCTATTTAAGAGTCATATAAATTTATTGAAAATCAAGTTGTATATCTTTAGAAAAGCACAAATCCCTGTAAAGCTGCAAATTGTCGGGCTTAATGTGTATAACAGCAGAATAGTCATCAAGAGCAGGTTTATAATCATCGACATTGAGGACTTTTTCGTAAAATTTTTCGTCAACAGACACATGATCAGGAGCAATAAGAAGTGCTTCTGT	-	-							-	1.13511	YNL326C	PFA3	G-SELEX
Peak_425	14	48557	48892	CAGGACGGCCCCTTCGTTTCGCATAACCAAGAACTTCATCACGTTTGTTTTGTAGGTGTGGTGAGAAACATTACAGACCATACTGCAAATATTTTTTTAACTATTGAGGATGGAACTGGTCAAATAGAAGTGAGAAAATGGAGCGAAGATGCAAATGACTTGGCTGCCGGTAACGATGACTCTTCTGGTAAAGGTTATGGTTCGCAAGTCGCCCAACAATTTGAAATTGGCGGTTACGTAAAAGTTTTTGGTGCTTTGAAAGAGTTTGGTGGTAAGAAAAATATACAGTATGCGGTGATTAAGCCCATAGATTCATTCAATGAAGTGTTGACGCAT	-	-							-	0.997802	YNL312W	RFA2	G-SELEX
Peak_426	14	51647	52006	CGAGAAATATTTTGATCTACCAAACAATTGCAACCGTTTCATGATTCGGTTGGTTTGAACGTTTGAAAATGCGGTTCAACTTTTCATATCTAGCAGTGGCTCATCTTTATGTACTCTAGTCCTAAATCTTCTGCTGGTTATCGCAAAAAAATATGTGATGTGCGGGTTTTTGGCAGTAATCATGACTCAGTCTCTGGAAAAACGTGCTATTTAACGGTTATATATCTATCTATGTACATGCCTGTGCATGAGCTCTTCATTCATTTCTGGGAAGGGTGAGGGAGCTGGGATGCATTTTCTGAGTTGTTCTTGGCATATTTTCCCAGGACGTCCTTTAGCGAATCTGGGATGTCTTCAAAC	51832	-	ATGACTCAG		AG		RR-YY		5.40889	2.31575	YNL311C	SKP2	G-SELEX
Peak_427	14	68950	69230	CAACGATTTCCAAAATATCGGACCGGCACCTAGACCTCCCAGTTCAAATAGCCAGGGCCGTACTTGCTATAATCAAACGCAACCTATAACCAAACTTATGAGTCAACTGGATTTAACATCAGCGTCCCATTTAGGTACAAGTACCTCCAAAAAAAAAAGCGGGTGGGTGTCCTACAAAGATGACGGTATACTTTCATTTATATGGCAAAAGAGATACCTGATGCTACACGATTCGTATGTAGCCCTTTACAAGAACGATAAACAAAATGACGATGCGATCT	69051	-	ATGAGTCAA		TT		RR-YY		2.48739	1.22028	YNL298W	CLA4	G-SELEX
Peak_428	14	90797	91183	GCTCTCTAACAATCTATCAAATCGTGTATGCAACGCTCTAGTTCTTCTACAGTGTGTTGCATCTCACCCAGAGACAAAACATCTCTTTTTACAGGCCCATATTCCTCTCTTTCTTTTCCCCTTCCTAAATACTACCTCCAGGCAAAGAACTTTTGAGTACTTGAGATTGACTTCATTAGGTGTGATAGGCGCATTGGTCAAAAATGACTCACAAGACGTAATAACGTTTTTGCTAAGAACCGATATCGTGCCGTTATGCCTAAGGATCATGGAATCTTCTTCTGAGCTTTCCAAGACAGTCGCCATTTTCATTTTACAGAAAATCCTACTAGATGACGTTGGATTGCAATACATCTGTGCCACCTTGGAAAGGTTCTACGCCGTAAC	91004	-	ATGACTCAC		AC		RY		6.47659	0.817814	YNL287W	SEC21	G-SELEX
Peak_429	14	150442	150909	GGAAAGTTTATCATAGGGTTAAAGTATCAGAAATTGTCGAACGAGAAGCCATTGTCTGCCAAAGAGAAAATCCATTCTACGTCGATACCGTGAAATCCTTTCGTGATAGGCGTTACGAATTCAAAGGTTTAGCCAAGACTTGGAAGGGAAATCTGTCCAAAATTGACCCATCTGATAAGCATGCGAGAGACGAGGCCAAAAAGATGATTGTGCTTTATGACTCATTACAATTAGCTCACAAAGTTATTTTGAATTCGTTTTATGGGTATGTTATGAGGAAAGGCTCTCGTTGGTATTCCATGGAAATGGCGGGGATTACGTGTTTAACAGGTGCCACGATCATTCAAATGGCGAGAGCTTTAGTAGAAAGGGTAGGAAGACCATTAGAATTAGATACTG…	150662	-	ATGACTCAT		AT		RY		12.8593	0.55706	YNL262W	POL2	G-SELEX
Peak_430	14	161459	161742	CAAGGCCCATGTTTGGCATATTATTTCAGCCAAAGATAGCTTTTCTATTGTTTTGCCAGTTCTACTATCAATATATTCTAGTTTGTATAGGACATGAAGCGATGAACTGCTCGCCGTCATATTCAACTTTATTTCAAGATGGTTATCTACATCATATGACTCAGTTATGACAAATTTAATTGAAAGCTTCAATAAATGACAAAATGGCACTTTAACGAAAAAAGGATCTAAATCGACTTCATAATATTTGTTATCAACAATTTTGACTATCCTCTGTGTAGCAA	161618	-	ATGACTCAG		AG		RR-YY		2.94497	0.927497	YNL258C	DSL1	G-SELEX
Peak_431	14	201443	201923	TTGGCGGAGATGCCGTGATTTACTTAAATGTTGACAATGAAACACTATCTAAATTGGTTGTTAAGAGATTACAAAATAACAAAGCTGTCTTTTTTGGATCTCACACTCCAAAGTTCATGGACAAGAAAACTGGTGTCATGGATATTGAATTGTGGAACTATCCTGCCATCGGCTATAATTTACCTCAGCAAAAGGCATCGCGTATTAGATACCATGAAAGTTTGATGACTCATGCTATGTTGATCACTGGCTGCCACGTCGATGAAACGTCTAAATTACCACTTCGCTACCGCGTTGAAAATTCCTGGGGTAAAGACTCCGGTAAAGACGGATTATACGTGATGACTCAAAAGTACTTCGAGGAGTACTGCTTTCAAATTGTGGTCGATATCAATGAAT…	201671	201788	ATGACTCAT	ATGACTCAA	AT	AA	RY	RR-YY	17.3061	0.840232	YNL238W	KEX2	G-SELEX
Peak_432	14	206834	207148	GCTTCGAACTTTTCAAAAGAAGTATAATTTCATTTCAAAAATAAGGTCCAAAGAAAAGAAACTAGCAGACCTGACCTTCTGTTGGTAAATATTAGTATGATGCTTGGAGAGCATTTAATGAGCTGGTCTAAGACTGGTATTATTGCATACAGTGACTCACAGTCCTCAAATGCCAATATTTGCCTCACATTTTTAGAATCCATAAATGGAATAAACTGGCGATTTCATACGCCGCAAAAATATGTATTACACCCGCAATTGCACGAAGTTCAATACCAAGAAAGTAGTAGTACTCTAAGCACTCACTCGACAACA	206989	-	GTGACTCAC		GC		RY		4.65798	0.882945	YNL236W	SIN4	G-SELEX
Peak_433	14	219712	220300	TTGCATTAGGGTTCACAGACACAAATTCGGGGGCCCTATGTTCGCCAAGATTGAAATCTAGGAAGATTGTGTTATAATGAAATCCAAGTTCACTTAGTACTATAGCAACTTTGAATCCATTAGGCGCAGACCTGTGAGAGAAAAGGGTATATCCCTCCAGTGGTTGTTCTTGAAAAAATTTTGTAATTCTGGAATACTCCACGTGACTCATATCCGAAAATGCCTGTTGTTGTTGTCGATGTTGTTCTAAGGTATTCTTGATATTATTCTCGTTATCATTATTTTGGCTACCATTGCGGCCGCTGTTATTGTTTTGAACATTATTGTTATTACTACTGCTATTGTTATTATTATTATTATTTACACCTGTTGAAAATTCAAAATTTATATTACTTTGAT…	219918	-	GTGACTCAT		GT		RY		12.5777	1.70557	YNL229C	URE2	G-SELEX
Peak_434	14	222019	222438	CTTAAAATCTCATCTTTAGCTAACTTGGCAAATATTTTTCCTGCAATTTGATATATCCCAGCAGCTGAGTTGTCTATTTTAGTATAAAGAGCAGAGTTAAAAAATAAGAGTAATTCATCAGTTGTGACACCTGTGACTGTAGCGTCTACCTCATAATCATAGTAATCATCAGTGCTTGGTGGAGTATCATTTAAAATTTGTTCCTTATGTGAGTCATACCATGCTCTTTCCTGGGGGTCAGACAGTACTTCATAAGCGGCTCGAATCACAGCAAATTTTTGTGTGGCTTCTTCAACATTATCTGGGTTTTTATCTGGGTGATATTGTAGGGCCTTTTTACGGTAAGCTTTTTTTAACTCAAGATCAGAAGCATGCGTTTCGACCCCTAAAAGCTCATAG…	222231	-	GTGAGTCAT		AC		RY		16.2853	1.20633	YNL227C	JJJ1	G-SELEX
Peak_435	14	234046	234316	GAGATTAGTCCCATTCAATTCGCTCTCGTGACCAAATCGTCGGGAAAACATGTCCCACTTACCTGTTCCTGTGAATCCAGATACGGAAAAAAATTGTATTTAAATAATCTCGATTTTACATTTACTGATCGCGATCCTTTTCATTGAGTCACAGATTAACAAAGTAAATAATAATAAGTAAACATTATTTCTAAAAAAGTAATTTCTTTTTCTTACTAGTCTTTTCTTTTTTGACTTTCTCTTTATTTCTTAACTTGCCTTATAAAAGAAA	234193	-	TTGAGTCAC		GA		RR-YY		2.79244	2.2809	YNL220W	ADE12	G-SELEX
Peak_436	14	284455	284695	GATTCTGATGAAGAAGATGAGAGCTCCGTTTCTGCGGACCAACAATTTTACAGCCAGTTGCAGCAAGAACTACCACAAATGACTCAGCAACTTAACTCTGATGATATGCAAGAGCAATTGAGTGCTACTGTTAAGTTTAGACAAATTTTGTCTAGAGAACACCGCCCTCCAATTGATGTCGTCATTCAAGCCGGTGTTGTTCCAAGATTAGTAGAATTTATGCGTGAAAACCAACCTGAAA	284537	-	ATGACTCAG		AG		RR-YY		2.19406	0.926353	YNL189W	SRP1	G-SELEX
Peak_437	14	295601	295860	GTTCTGGTACAAGCCAACTAGTTTGTATGGGGTTGAAAATGACGCAAAGGAACGAGAACTCCTGTTTATTATTCTTTCAATAACAAAAGCAAGATTTTTAGTCACTGCCGATTGTTGCCACTAGGTACGCCACTGACTAATCCGTACTAACTCTATACAACTAAAGGCGGCCCATATTCTGAGATAAGCTATAAGGGTAGGAATTGTGGGATGCGTCATTGATAACGAAAAAATTCCGTAATAGATGATCAGTCAGATTG	-	-							-	1.7593	YNL183C	NPR1	G-SELEX
Peak_438	14	300930	301290	AAAAAAAAAAAAAAAAAATAAAAAAAAAAGAAAAAAAAAGGAGAAACATGATTGCCAGTACTCGCAAGAACTAAGATAGAGAGAAAAAGGACGATATATCAAGAAATAAAAGGGAAGGTAATTCAAGTAAGCACTGCTTAGCTGTCTGCATAGGAGCCTTCTGCAATTACTCATCTCATCGTATTCGTCATAACCCGTTACGTAACTGATTTGACCAAGAAGCGTAATGAAAATTTTGAGCGGACGCCGAAACGTTGTTTTTTTTTTGCTTTAGTCCAGATAATAACCTTTTATAATTTTCTTTTTAGGGAGGAAGACCGGTCTAAGCTCTTAGAGGTTCTCGCATACCCAAGTAAAAGCT	-	-							-	1.28624	YNL180C	RHO5	G-SELEX
Peak_439	14	301932	302149	TCTTAGAAGGCCGGCCCGCATGATCCAGAAGCAGACCATAAAAAAAATAAAAATTCGCGGTCTGGCAGCAGGCATAAGATGCATAGCGTTATCCTAAATGACATCACGATGATAAATCCTCCGCCGCATGATGCTTTTGATTTGCCTAAGGGCCTGCCATCGTGCTGGCTCAAACTATTGAGGGTCAACATACCTTGAAAATCCAAGTAAAAGGATGG	-	-							-	0.834791	YNL178W	RPS3
Peak_440	14	339685	339962	CAGAATCAATCTTATATAAGGTTCCTCACAACTTTCCCCTCAAAAAACCAAGAGACAGCTCTACTTATGCAAGAGATGTAAACTTGATATCTTCCATATCACTATCGGGAGAAGCAATGAGTCAGATCACTATCGAGGCCAATACCACTGACTTGGAGTTGCATAATACTACGTATATTGAACTGGCGGACTTACAGCGAGACGAAACATATCAGATTAAAGTGTGTTGGTCAGCAATACATCCAATTTCCATTAATAATCTCCAAACTATCACAATA	339805	-	ATGAGTCAG		CT		RR-YY		2.90977	0.945078	YNL158W	PGA1	G-SELEX
Peak_441	14	381161	381495	AGCACCTGAGTATATATCTGACATAAAAAGATTTCTGAAGTTATCGTCAGATAAGAAGATGGAGTCAAAATGTAAACAATAACTTTAACCTATATAAATTTTCTTACATTTGCTTTTAAATACTCGAAGATTTGCATTGAACGATCGTTGCCGTTGACTCATTTGAAACAGAAAAACAATACACGCAGGAAAGGAACGGCAGTTGGTCTGAGAAACAAAACCAACTTGCATTTTAGGCTGTTCCGATAGTTTATCAGAGTAAGGGAAAAAATAGCGTGCAAAAGCTATCGAAGTGTGAGCTAGAGTAGAACCTCAAAATATGACTTCGAAAAAAG	381318	-	TTGACTCAT		TT		RR-YY		3.94227	-	YNL130C-A		G-SELEX
Peak_442	14	392541	392895	ATTGTAACTAGATATAGGAAACTGTGGTCTGCAAAGATGCGGTATAAGGCCTCCGTCTGTTCTTACTGCGTTATCAGCCTTTGACAGTTTTAGTTCGTCAGGGTCTTTGACCAAATGATAAATTCCCTGGTTTACATTTTCACTAGTTTGTTCTCGAGCAATGCTTAGTTGGCACATAAATGAGTCAGGCACTACCACTCGGGTAACGGTCTGCGCGTTTCTTTTTGCGGCCATGAAATTTTTCAGGCGATGAGCTTAAAGGTAAAGGAAAAAGATGGTAGGATGATAGGTAGGATGAAGCGGTATGAAAGTGGAAGAAGCACAATATAGCACGTCGAAACAGTGCTAATCATGA	392724	-	ATGAGTCAG		CT		RR-YY		5.53795	1.347	YNL124W	NAF1	G-SELEX
Peak_443	14	402991	403262	GTCGTTGCGTTTCATTGACGTTGACATTTCACTTGACGGTCCACCCTCAGTGCGAGGGTACCCGGTAGAGTCGTTCTTTTTCAAAATATTCAACAATCCTTTAGCTGAATTTTTCTGCGAGTATGAGTCAACATTATAGGGCTGTTTTGGTGCTGTAATGTCTTTTTCCTTTTGTTTTAACATTCCCAAAAGTTCGCTTGCATTCGCATCGTTTATACTTGAAGTTGATGCATTTTCTTCGCTATTTTGAGGTTTTGACACAGAATTCCTCT	403117	-	ATGAGTCAA		TT		RR-YY		3.1679	0.699258	YNL119W	NCS2	G-SELEX
Peak_444	14	412465	412695	GAAAGCTTATTCAAAAAGACGCAACAATATCATAGATTATTCTAAGTACCAACAACGTGATAAACTTTGTTCTAATAAAGCTACATCTTATCTCTTCTGTACAGCTTTATTGGGGTGAATCATATTTACTTCAATCCGGGTAATGGTAAACGTAACAAGTGATAGAAATATTCACCTGCGATGAGCTGGAAAAAAAAAAAATTTCAAAAGAAAACCATACTAATGCTGAGG	-	-							-	0.727707	YNL113W	RPC19
Peak_445	14	426654	427377	TCCTTAAGCATATTTTTATAGGCTAGCTTCACTGGAGGAATAACTCTTGAGGCTCTGGAGGCCGCATGCTCAGCAAGAGCAATAATACTCTCTTTAACCATGATTGTTCCTTGTCTTTTTGTAAGGAAAAAGTCTACAGTAAACTTCTAGTGTGAGAATCCTTTTTTTTCTTCAAAAAATACCCTTTGAAAGAACTGAGTCACTTACACGTAAGTTTCTTTTTACTGGTCAAGTTGAAAAATAACCAATAAATGATTATGGAAAGAACGTTGAAAGAGGAGAGAGGCTGACCCAAGAGGAGAAAACATCGAACCTACGCGACTCCATAGCGCACATCTCCCATGCGCCCGTGCTTATATATATATAAATATACATACACACATACATGCACGCACATAC…	426852	-	CTGAGTCAC		GG		RR-YY		4.59932	5.39752	YNL104C	LEU4	G-SELEX
Peak_446	14	453459	453724	ATCCAAAGGAGTTTACCACAATGCTGCATAGTGGAAAACCACTTACAGAAGATGAGTATGCCGACCTCCAGCGCAACATTGCTGAAAGGATGACTAATGCGTACGATACCGCAAGTAAGAAATTCAAAGATGTGTCACAATTAGAGAAGGAGCTATTTACACGATTCATGTCGGGGAGAGACAAAAAATCTTTCAGAGAGTTGATAATTCAATCCTTTAAAAATAAATTTGATGGGGAATTAGGTCCATCCGTTCTAGCAGCCACT	-	-							-	0.79323	YNL091W	NST1	G-SELEX
Peak_447	14	493298	493539	TCGGTGAAAGAAACTAGTTCCCTCTTATCTCTCAATATTTGCCAAAATTAGCTTTTAACAAATAAACCATGAGTTTCCTACCATCTTTTATCTTAAGCGATGAATCTAAAGAACGTATTTCCAAAATTTTAACTTTGACTCATAATGTAGCACATTATGGCTGGATCCCATTTGTTTTGTATTTGGGCTGGGCACACACTTCTAATAGACCAAACTTTTTGAACTTACTGTCTCCGTTACCA	493436	-	TTGACTCAT		TT		RR-YY		2.71031	0.977046	YNL070W	TOM7	G-SELEX
Peak_448	14	502361	502739	GAAAACATGGTGATTCCTACATATGTGCAAGCAGGTGACTCTTTACCCTTGACTGTCGTTGATCAGGACACCTACTACACTTGGCAAGGATTGAAGACATCCGCGCAATACTACGTTAACAATGCCGGTATTTCTGTCGAAGATGCTTGTGTTTGGGGTTCTTCAAGTTCAGGCGTCGGTAATTGGGCTCCATTGAACTTTGGCGCTGGTTCTTCTGATGGTGTCGCCTACCTTTCTTTGATTCCCAACCCAAACAACGGTAACGCATTGAATTTCAATGTCAAAATTGTCGCCGCTGATGACTCTTCTACAGTCAACGGTGAATGTATCTATGAAAACGGTAGCTTCAGCGGTGGCTCTGACGGTTGTACCGTTTCCG	-	-							-	0.609473	YNL065W	AQR1	G-SELEX
Peak_449	14	503148	503490	GAAAAAAAAATCCGGAGCCCCTCGATGACTCCTGTTTCCGTTTTATACTGTCCAGCGCAGACCGCACTTCCTACGTATACTTCTTACGGGGAAGGGAGCATACACGAAAACAAAAGGACCCGTAATGACTCGGAAACTCCATAGATCGGTAAATACCGGCTCGTTACCCGTCCTCCATCGGAAAATCTCTCACCGATTTGTTCCGGTATCGGATAATTTATGAATCACCCGGCTTGATGGAACCGTTTTTGTTCCGTGAAATGCCCGGCCTGCATTGTTTTCTTCAGACGAGAAGCCGTTCCAACGTTTCTTTTTCTCGTCACCGGGAAGTTGCGGGCACCTT	-	-							-	0.609473	YNL065W	AQR1
Peak_450	14	559432	559920	ATCAGCCGTACAGTGTGATTGTTATCACGTGATAGTAACGTAAGTCACGTGCTTTCTAACCATCACCCCGCACGAACGTTCGTTCCCGTTTCGATGTTGACGTCAGAATGAGCTAACTTGACGCCACTGAATTAATTCGCATTGTCACCATGACGCTTATCAAGCCGAAAAAATTACTAGTGATTCCTTCCTCCCCCTCTCTCGATGAGTAATTTTGAAATGAACAAGTAGGCTGACATAGAGTACTATAAATACTTAGGAAGTAATGATTCTCGAGGATAGGTAAGAGCTGTCCTCTTCTAATTCTTGTTCGTTTTCTTCTGAAAACCCCAACCACATCAACTACAGCTAAGACTACAAATTTCAATTATTACACATCAGAATGAGCGCTACCGAATC…	559851	-	TTGAGTCAC		GA		RR-YY		3.32042	4.3156	YNL036W	NCE103	G-SELEX
Peak_451	14	590753	591213	TTTACCGCACCAACATGTGGGCCGATTTTTTACCGGAACTCTTTTGCTAACATAATAGCAGTTTGGACATTTCCATATTCTATCTACGGTTTTTTCCGTTGATTTTAACGCCCATTCTCTTATGCATCCGTAATCAAACACTCTATAACATCTCTTGCAAGCAAACATTTGGCACGTATAATCCATCTCTACTGTACAAATCATACAAACATATGAGTCACCGCTAGAAATTTCCTGGATCGCACGTTCGTAATATTGCATATCATCATCACTTTCCTCTTCATACGAACTAGGCTGCTCGTTGGCGTCTTCAACACTCGAAATACACCCATCGCTTAGGTTGTGATGTCTATAAGTGTCACCGCCGTCTTGATTTTGCTCCAGGCCTAAAGACTCATG…	590969	-	ATGAGTCAC		GT		RY		18.8431	0.78148	YNL023C	FAP1	G-SELEX
Peak_452	14	622765	623306	TCCTTGGGTCGTTTCAAATGACTCTCTTTGTTTAGCGAGGGAAATGAAAAAGTAGAGTACTGGCTGAAAAATTTCATAATTATGTTTGCTCATGAGTTCGAAAACAGTTTGAATGAGCAGATAGAACGCCAAATATTAAGTTAACAGGATATGTCTGATCAAGAACGAGGTTCAGAAAACGTATGTTTCATTGATAAGGGAGGTGAAGAAAAGTTTGTAAAATGAGACTTTATGAGGTCATTGGAATTAAATAGACATCAACGAATGGTGAGTCACCATTTAATGCTGCCTTCAAAACGCTTGCTTCAATGTGATTCCACTGGTTAAAGGGGGTTTTTTGAATGCATTGCTAATGTTTATCTACTGGCTATGAAAGTGAGAATATCAATTATAAATAAA…	623036	-	GTGAGTCAC		GC		RY		29.5905	1.80999	YNL004W	HRB1	G-SELEX
Peak_453	14	642271	642511	GAGTTGAACGATTACATCTTGAAAATTGCAAGCGGTAATGGCGATCTCGTCGAGCCACGCCAATTGTCTAATTTGAGCCAGTGGGTTTCTCAGATGCCCTTCCCAATGTAAATGACCGACATTGACTCACTATCCATCCGTGTATTATTTCAAAGAGCGAAAAGAAGGCGCGTCGCGTCGACGCGCCTTTTTAGGCTAGAAAATAAACAGAAAACAAAAACAAAAACAAAAAAAGGCGAAA	642396	-	TTGACTCAC		TC		RR-YY		2.68685	0.476519	YNR009W	NRM1
Peak_454	14	672387	672749	GGAACCAAGGGAAAAGCAACAAATGAGTGCTAACAATGGTGTCACTGGCAAACTCTCTAGTAGAGTCATGAATATGAAGTTTATGAAATTTGGTAAGACGGATGACGAAGAGAGTTCCAACTCCAATACGCCGTCTAATATCAACTCAGATGTGGAACCTATAGAGCAGAAAGGTAAACTCTTTGGTCTGGATGACTCAGCGTGGGACCTCAATAGCTACAAAGATGATTTAAAAAAAATTTCAGGTAAGGAGAAGAAAAAGGTGAAAAGAGTAGTATATAAGAAGCGACCCAATCTCATAATCTCCAACGTTGGTTACAGTGAACTGCGAAAACCTGAGGGTGTGATAAGTGGGAGAAAAAC	672582	-	ATGACTCAG		AG		RR-YY		5.0217	1.15355	YNR024W	YNR024W	G-SELEX
Peak_455	14	690609	691127	TCCGGTGGTTCGTTAATCCAAGTGTTGCACGAAGGATTGTTGAAAAGAGACGACGTTCAATGGGGTAAATGGGACATTTACTTTGCTGATGAAAGACTAGTGCCCTTTAGCTCCAGTGAAAGCAATTACGGTCTTGCTAAGAGAAAAATATTCGATTTAATAGATACGGAGAAGTACGGAACTCCGAAAATTTATCACATTGATGAGTCATTGATTAACGACCCTCAAGAGTGTGCAGATAACTATGAGAAAATTCTAATTAAAGGATTTGCCGGTAGAGATTCTGTGAAACTACCGATGTTTGATCTGTTTCTGCTTGGCTGCGCTCCTGACGGTCACATAGCCTCGTTATTCCCCAATTTTCAAGAGAATCTACGTGAAAATCTGGCATGGGTCATA…	690815	-	ATGAGTCAT		AT		RY		13.8449	2.22834	YNR034W	SOL1	G-SELEX
Peak_456	14	715426	715845	CTGATAAGTTTTCCCTACTGCCTAAGGATCCTTCCCATGTAATTTTACCAGGACCCTACGGTTTATATACCATTAAGCCAAATTCTGTGCTACTTTCTATCATCTATTGCTGATAATTCCATTGGAAATTCTCAATACCCTTTATTGACATCTTTATTTTTCACTACAAAGCGAATTTTTCCAACGGAATTTCGATTCCAGAGTATGAGTAATTCTTTTCACTACTAAACGCATTGCTTCGTGGTCAGTAGTAACCGCAATCACACTCTTCACTTCTGTTGTGGTGAATATCAAAAGAAACAAGAGATCATCCACAATTTCCTCAGCTTGACTTGTCTGCAGTTGCGATTAAAATTTGACTTTTGCTCCACCGCTCTCTACAGGTATTATATTTGGAAA…	-	-							-	1.57692	YNR050C	LYS9	G-SELEX
Peak_457	14	733764	733999	GAAATCCAACAACCTGATGTCGACATTAGGTTCGTACTCCATGGCCTGGAGCGGAGATAGAGGCTTCTGCAGCGCATAAGTGGGCGTGAATATAGGTGGTTGCCAAGTTGATGCGGCTATTTTGAAATTTTTCAATGTCTCGGAGTCACCTTGATCTGACTCAATTCCAGTTTGTACGGGTTTCCAGTATGCAGCTTTCCATTTGTGTACCAATAATGTTGATACAAAGGTTTTAC	733923	-	CTGACTCAA		CA		YR		2.25273	2.44431	YNR057C	BIO4
Peak_458	14	762774	763234	AGAAGTGATGTGATCATATTTTGTACAATTGGAATTGCTTCCCTTCTATAAGTGTGAATTATTGTTCATATCTTCCAAGGAAATCATTTAAATGGCATTGCTTATCTACTGAACATTTAGTAAGCAAAAGTGAAATTTCTAGGGGACTGTTCGCTAAAGCTGTGCGCGGTCTAAAGAAAGCGGTAAAGATAGATAGCATCTAGTCCAATGAGACGAGAAAATATATAGATGACTCATAGAAGATAAAGTAGTCCTAAAGAATAGTGGTGCATCTTCTTTAAGCCTCACTCATTCTCGCTTATTCTTTCGTATATTTGCACAATAGGTACGCTTGTCATTATGTAGATTCTCAATACTTGATTTAAGCAGACAATAACAATTTCCAAACGGAGACTTTTT…	763006	-	ATGACTCAT		AT		RY		20.3332	3.66235	YNR069C	BSC5	G-SELEX
Peak_459	14	764552	764996	ATATCTGCAGGATCCACTCAATCTTGAAAAGATACTGTAGAGGAATACCCGAACAACAAATAAATCATGTTACAACTCTTTGACGGCGAAGGGTGTGGCTACCGTGCTGCAACATTTTAGTTACTGCTGGTACATTAAAATTGGGAAGATGTCCAAGAGAAGAACATGTTCTGCTATCGAATCTCTCACGATATATATATATATATATTTATATGACTCACCTGGTAAAACATCTATGTTTCGTTTCATATGAGGGCTTAGGTACCATTCTTTTAGAGTTAAGATCTCTTATTGTGGAAAAAAGAAGTTGAACGTGATTTCATTTGTTTATTGTGCTAGTGGCTGGAAATATGAAAACTTTTGCTCTTGCAACGTACCTTTTTACTTAATGTCTTATAT…	764768	-	ATGACTCAC		AC		RY		15.159	1.2125	YNR070W	YNR070W	G-SELEX
Peak_460	14	774343	774636	TCTGATTGATCATAGAGTGCATATGCTTGTCTTGATAGGCAACATTGTATATTATATTTTACATAATAATGTGTAATTCTAATTTGTCACGAATTTATGAAGATTCTTGGAGCTATGAAGATCAACATATGTAGAAACTGGTATGTGTCATAGGTAAAAAGTATTCATTAAGACAAAATTGTGTCTAATTCTTAGTCATTTATTCAATTTTTTTTTTTTTTTTTTACGTAAAGCGGGGTGGAGTGACATGATATGGTGATGGTGATGAGAAACTCTAAATGGATCCATTTGACT	-	-							-	1.06261	YNR073C	YNR073C
Peak_461	14	782559	782784	CGCAGCACTTTGTCCTTCCATAAAAATGAGTCGCTGCTTCTTTTTTCATTTTTTGGCGCGTCGCGTCGGGCCGTATAGAATATGCGTCACTTCTAAGAACAAGATTGCAGATCAGGGCAGTGCGAGTTACAAGTCATGGTACCAGACTCTCATTTAGAGACCCTCATTTTTGACACTTAAAATATCAAAATTTCTGGGTTGCGATAGTTTTTGTGTAACTGTAACT	-	-							-	0.970643	YNR076W	PAU6
Peak_462	15	5475	5704	TTTCTTATTAAGAGATTACAAACCATTAAAATAATTAATAAAAAATTTATGTATAACCTTCACTTGTGAGTACTACACTTCATTATTAGTCACCAATATATATGTCCATTCTGACAGCATTTAGAGTCTCGAGACCTCGGCTAGAACCTATATTAGTTATACAAGGCCACCAACTCATTCTAATCATGCGTCCCGTAAATCTATCAGTATTCTTGTGAACGTTTTTTACT	-	-							-	0.697751	YOL164W-A	YOL164W-A	G-SELEX
Peak_463	15	27771	28016	TAATTTATCTTGCTGAAAAATTCGAAAGTTAAAACTCAATTATGCGTGGGATTTCTCAATTAGGTTACCAGAATTTCAATCTGCTGAAGAATTATGTCTTAAAAAAAAAAGTCCCGCCTCAAAAAAGCCAAAAAGGGTGTGACTGTAGATTGTGGGTTACTTGCTGTCAAATGACATGAAAATCTCTGCCTGCATGATCCCTGTCAAAATTCGAAAACACGCGGTCATAAAATTGTGCCTCAAAAA	-	-							-	-	YOL155W-A
Peak_464	15	39825	40147	CATAACAAAAGTTTCATCATGCCACCAGCGTAATGACAGCCGCAGCAGTGTTTGACCAATTGAACTATGATAAAACTACATTATGGTTTCTGACTATGTCTGTACATCCATGCATCATCTTTTGAAGTTTTTATTTTGATAGCATCCTATTTTGTGACTCTTACTTTACAAGAACGCCAACATAGGGAGTGATTGATATTCTCTGAATTTATCTGGATACAGCCAATGACATCCTGAAATACCTATAGTGACAGTAGCGCATTTCCTGGTCATTTATTAATGGTTTTAGACACAAAATGAAGATAACAGATAATACGAAAGTA	-	-							-	0.925935	YOL152W	FRE7	G-SELEX
Peak_465	15	58336	58828	ATCAGCCTTGATCCGCTGAGTGAGACGCTAACATCAATTCCCATATCAAGACGCATATGGGAAGATCACTCACTAATGCTTGCTGGATTTAGTTTGGTGTCCACTTCTATGGGCACCATACATATCATTGGAGGCGGTGCCACTTGCTACGGCTTTGGATCAGTGACTAATGTAGGTCTTAAGCTCATAGCAATCGCGAAATAATGCTCCTATCGGGATTCGAATGGTTGCCAGCTCGCTATGTGACTCACTTAAAGTACATGATGCGTCATTGTGCACTTTTTTACGAAATAATGGCCTTTTTCCGCTCTATTTAAAAGCGTGAAAAAAAAATTGCAACATGAAGAAAATTCGACTCTTAAGTGCAAGTGACTGCGAACATTTTTTTCGTTTGTTAGA…	58582	-	GTGACTCAC		GC		RY		25.3549	3.55275	YOL140W	ARG8	G-SELEX
Peak_466	15	62085	62473	CTTACGCTGTTGTAAGTAAACCTAGGAGATATATTGTCATCTTCGTTACCTATGTCCGTATCTCCATTGTAACCGTTGGGAGAATGCAACATGAAAGTATCTATGAATGACTTGCGGTGCTCACGTTTCTGCAATATTGGTATACTTTTCGCGATAGGAGACGCGTGAAATTGTGCTGACTTAGTCGGTGAGTCATGAGGCTGTTCTTCTTCTTGATGTTCATGTTCGTCTTCCTCTATAATCACATCGTCACTCACTGTTTCTCCCATTTTAGTCCTTGACTCCAAGCGTTGGTTCTGTAGCTCTTTTAGCTTAGTTAAAACTTCATCTGAATCCTCATTTGGCTGCGCATAGGGGATTATTTCCGTGTTTTTGAGCTGCTCTTTGAG	62276	-	GTGAGTCAT		AC		RY		8.33039	0.666008	YOL139C	CDC33	G-SELEX
Peak_467	15	96308	96738	ATCCTTTGAGAACAGGAACCTCTTGGAGTTAGCAATTATGGGAATGTTCAACATCCTCCGTTTGTTAAGTTTATGAAAAGCTCTTTCAATATGGTTACAAATAAAACAGAATCAATACTTTCGAGGTTATTTGCCGTGTGCCAAGGAATATTTTCCTTCTCTGAAATAGGCCTTTTGTTATATTTTAGATTCGCCTGTGACTCTTTGCCATCTCGCCTGTTAATTACCGCTCATAGGCACGGCTGACTAATTTGAAGCTATCGAAATTGCTATAAAAGGAAAACTCTCTTATCATCAAGATCAGGCGGATCTCCTGAGTTTCTGACCTATAGAGCCCCAAAAAATGGGATGACATGTACATATATAGTGGTCAACGTTAATATGAGTGGCCTCCCAATG…	-	-							-	9.93338	YOL119C	MCH4
Peak_468	15	107470	107837	TCATGGAAGAAGAGAAAGCATTTTGGATGCTGGTTATTATTACCGGTAAGTATTTACCTGGCGTGTATGAATCAGACTTAGAGGGTGCGAACGTGGATCAAGGGGTGTTGGTGTTATGTATCAAGGAATATTTACCCGAGATATGGTCACACATTGAGTCATCGTATATGAATGGCAATGGCAGCACTGACCAGATATCAGGGCCAGCATCGGGGGAAGAATATCTCTGCAGGCTGCCTACGCTGACGCTGTGTACGGCAAGTTGGTTTATGAGCTGTTTTGTGGGCGTGGTGCCCATCGAAACGACCCTGAGAATATGGGACTGTTTATTCTATGAAGAGTCTCATTTTTTATTTAAAGTGGCTTTG	107627	-	TTGAGTCAT		AA		RR-YY		3.32042	1.21381	YOL112W	MSB4	G-SELEX
Peak_469	15	129523	129890	TTAAAGAAGTAATGATTAATGATGAAAACGGAAAAACTGTCGCTAGTACCAACGACGGCAGATATGACAACGATTACGATAATAACGATATTAATGACCAAAAAACTTTGGATAATATAGCGGGAAGTCCCCACATGGAAAAAAATCGAAACAAAGTAAAGATTGAACATGACTCTTCATCTCAAAAACCAATAGCTAAAGAGTCATCCAAAGCCCAAAAAAATATAATCAAAAAGGGAATCAAGGACTTTAAATTTGGTAGTGTAATAGGTGATGGCGCGTATTCTACTGTAATGTTAGCGACGTCGATTGATACCAAAAAGAGGTACGCCGCAAAAGTACTAAACAAAGAATATTTAATACGCCAG	-	-							-	1.2797	YOL100W	PKH2	G-SELEX
Peak_470	15	146136	146569	TGCAAGAAATGTATCAACTAGTGAAGAAGAATTCCAGCGCTAGAAGAACAAAGATAACAGACTATGCCTCTAAACTTAAAGAAAAAGAAGCGCAATTAAAAAGTCAAAATGACAAAATTTTGAAGTTAGAAACAACAAACAAGGCCTACAAAACTAAATACAAGGAGGTCTCTCTGGAAAATAAGAAAATAAAAGAGGCTTTCAAAGAACTAGACAATGAGTCATACAATCACGATGAGGAATTACTAAAAAAATACAAATATACTAGGGAAACCTTAGATAGGGTCAATAGAGAACAGCAATTAATCATTGATCAAAACGAGTTTTTGAAGAAAAGTGTCAATGAACTACAAAATGAGGTTAATGCTACCAACTTCAAGTTCTCTTTATTTAAAGAAA…	146356	-	ATGAGTCAT		AT		RY		21.0841	0.870956	YOL090W	MSH2	G-SELEX
Peak_471	15	150378	150867	CTTTGTAGACAAGGTACAGTTTATTCATAATCCCTAAAAGTGTTCACGAAAGAATAATCTCTGTCATAGATCAATTTTCCTAAAGGCAATAAGGCTCTAAAAGCTTCGAAATCTTCCTTTATTCCACTGTCACTATTAAAATTAGAATTTTCAGGGGTCTCTAGACCACTGGAAAGAGTATCTCCGGTATCAGAACTATGGATGGGATAAACAAGAGATGTTAGGTCCGAACGAATTGGGTACAAAGATGAGTCATCAGATATTCCTTTCCTATTTGAAGATGGCGATAGGTCTCCAAAATTTGAGATGGGGGAGTGAGATTTTAATAGTTTTAAAATTTCGACTGATAACTCTCCAAATAAGTTTATTGGTGCTTCCTCCGCAAAGTCTTCTGAAGAA…	150629	-	ATGAGTCAT		AT		RY		24.5336	1.46562	YOL089C	HAL9	G-SELEX
Peak_472	15	159303	160134	TAGCATATCTACAATTGGGTGAAATGGGGAGCGATTTGCAGGCATTTGCTCGGCATGCCGGTAGAGGTGTGGTCAATAAGAGCGACCTCATGCTATACCTGAGAAAGCAACCTGACCTACAGGAAAGAGTTACTCAAGAATAAGAATTTTCGTTTTAAAACCTAAGAGTCACTTTAAAATTTGTATACACTTATTTTTTTTATAACTTATTTAATAATAAAAATCATAAATCATAAGAAATTCGCTTATTTAGAAGTGTCAACAACGTATCTACCAACGATTTGACCCTTTTCCATCTTTTCGTAAATTTCTGGCAAGGTAGACAAGCCGACAACCTTGATTGGAGACTTGACCAAACCTCTGGCGAAGAAGTCCAAAGCTTCTCTGGTGTCAGCTCTG…	-	-							-	0.712425	YOL086W-A	YOL086W-A
Peak_473	15	201887	202153	TTTTTTTCTCACAAAAACAACAAAAAAGAAGAGAAGTGTTCGTATCACTACCAACGAGGGTTATCACAACATAGCAATAGTGAGAGTCAGAAGTACTTTTAGCTACCATTACCGTACTCACCATACCCTCCGTACTCGAAGGAGCTCAACCTCTTTGCTGGCGGTCTTACTGAGTCATCATTTGTTGCGGCCAGCGGTCCCACGCCAATCCTGGACAGGGCGACTTCAGCGCTGGTGTTCTCTAAGTTTATATCGTTGACAATGGTG	202060	-	CTGAGTCAT		AG		RR-YY		3.0623	0.825041	YOL068C	HST1	G-SELEX
Peak_474	15	206411	206811	TATTTAGTTTGTTTTTGATAGCAGTTTGTTCATCATGAGAGGAGTGTCCCTTTTCAACTCCCTCTAAAGTAATCATGTCTTTAGTGTCTTTTAAGTGTCTAACGTGGATTTTGGTCCATGACTCTGCATCTGAAGATGGAGAATAGAAGGCACCTAAACCTCTAACAGCACGAAAGATATAACCAAATGACTCATGGCCTTTCAAATCTTGGGCCCCATAAGAACTTAAAACTAAGTTGGGGCATCCAATACAACCAAGCTGAACAACACCGTCCACAATTAAGGCCAGACATACTGCAAACTGTTCACCTCTTAAAAACCCCTTGGTTCCGTCAATAGGATCCAAACACCAAAATCTTCCTTTTCTACCACCTTCGTAATTGCCGAAATCGATGATTT…	206601	-	ATGACTCAT		AT		RY		8.55332	3.83643	YOL064C	MET22	G-SELEX
Peak_475	15	207143	207502	GAGTTGCAACCAATAATTCTCTTTCCAATGCCATAGTAAAGTGCTGATGTCTTCTGAGTTGTCTTTAAACTTCTTACTTACTAACTAATAAATTAAAGAGAAGTGCAAACGTTCTTTATATGTGGCATGGTTTCTTCTTTGCAAACTGAAAGTAAAATCGCAACACGTGATATTGCTCGTCTGAGTCATTCGCGCATTTCAATGAAGGAAGGATTATTATATAGATGGCTATGTAAATGTCAAAATATGCTATTGTTGAGTTGTTCCATGCTCAGTTGTGATCTTGAATGCCCTCAAGGAGCCTCTTGATGCTACGTATAAGGTAGCATATCCCTTACGTTTTAACTCTTCACTGTCAGA	207327	-	CTGAGTCAT		AG		RR-YY		6.24193	3.83643	YOL064C	MET22	G-SELEX
Peak_476	15	218619	219290	ATACATAACTACCATTATACACGCTATTATCGTTTACATATCACATCACCGTTAATGAAAGATACGACACCCTGTACACTAACACAATTAAATAATCGCCATAACCTTTTCTGTTATCTATAGCCCTTAAAGCTGTTTCTTCGAGCTTTTTCACTGCAGTAATTCTCCACATGGGCCCAGCCACTGAGATAAGAGCGCTATGTTAGTCACTACTGACGGCTCTCCAGTCATTTATGTGATTTTTTAGTGACTCATGTCGCATTTGGCCCGTTTTTTTCCGCTGTCGCAACCTATTTCCATTAACGGTGCCGTATGGAAGAGTCATTTAAAGGCAGGAGAGAGAGATTACTCATCTTCATTGGATCAGATTGATGACTGCGTAGCGGCAGATAGTGTAAT…	218869	-	GTGACTCAT		GT		RY		66.6197	24.9485	YOL058W	ARG1	G-SELEX
Peak_477	15	219961	220225	TTGGATGTTTTCTTGGCCGCATCCAACTTAGCAAGGGCCAACGGTGTTGGTAGAATCGATATTGTAGAAGATCGTTACATTAACTTGAAATCCAGAGGTTGTTACGAACAGGCTCCATTGACTGTTTTGAGAAAAGCTCATGTTGATTTGGAAGGTTTGACTTTAGACAAAGAAGTCCGTCAATTGAGAGACTCATTCGTCACACCAAACTACTCCAGATTGATATATAACGGTTCCTACTTCACCCCAGAGTGTGAGTACATCA	-	-							-	2.08148	YOL057W	YOL057W
Peak_478	15	257104	257491	AGGTAACAGTAAAGAAGAATTGGCTTTGTTACCACCTTTACCTCACACAGGAGAAATGGAAATCACTCCACAATTTGATATCAACGAGGCTATTTTTGAACGAGATGACATCAGCCACTCTTCAAGGCTAGAACCAGATGACGTGTTAACAAAGTTAGCGAACTCTACTCGAGATGCTACGGGTGAAGATCAGGGGTTTGTTGTCATGACTCATGGCCACGATGCGTCGACAAACGACGATTCGCAATTAAGCGCTACTATTCTTGACAATCAGACGTCATTTGATCTTTCTAAAGCTCTAGAGATGACTAGCCATTCAAATATTTCTAATATTATTAATAGTTCCGGTTCTGAGGGAAGACGTTCAAGGACACCGGTAAGCAATTCC	257313	-	ATGACTCAT		AT		RY		6.85204	1.08055	YOL036W	YOL036W	G-SELEX
Peak_479	15	282675	282919	CATATCCAGTTTCTGTGGACTCGTTATTCCTCATTACTTGCCCGACATAGTATTCTATGCTTGCCCTACCGGCGAATTGGGCGTTTCTGTGCTTTCTGTTGATATTTCTGCAAATCATGTCCATTTTATTCTTATCACGATGAGTCAAACTTAGGGGTTCATACCCAATGGCACCTGCTAATTGTCTATGGGCCACAACATCACAGTAACGTCTAATAGGTGATGTGAAATGTGTGTAGATATCA	282818	-	ATGAGTCAA		TT		RR-YY		2.68685	0.517562	YOL022C	YOL022C	G-SELEX
Peak_480	15	295631	295983	AATGCATATACTCCACGGCACCAAGAATCTGAACTATGATTTCAACAGCATCCACTTCTGTGAACTTCCCTCTAGACAGAATTCTATCAAATAATTCACCTCCTGTTGCCAGCTGAGTGACAATATAGAACTTATCCTTCGATTCAAACCAATCCTTGAATGACACAATGTTCGGATGACTCAATTTTTGAAGAATGGACAGCTCTTCGTACAGCATCTGTAATTGCACATTGTTTCCCTGCAATGCCTTCTTCAATAAGATCTTTATAGCAACATCTTCATTTGTGGACAACTTTCTGGCTTGTCTCACAACACCGAAGGAACCGGCACCCAGTGTTCGACCGAAAATATAA	295810	-	ATGACTCAA		AA		RR-YY		2.80417	2.40986	YOL016C	CMK2	G-SELEX
Peak_481	15	397884	398436	TCACTTCGAATAATCCAAAAAAAAGCATAAGTAACCTTTGTCTTAACTCAATGTCATCAATTTGATCCGCAAATACCTGAATAGCATTTTCGATTAGTTCTTTCTTGGTTAACAGTTCCTTAGCTATCAATGGAATCGTGGTGGCAATGTTAGCAAAGATAGCAGCCACTGCTCGTTGAGACTCAACGTCGGATAACTGAAGAAGTTTCACCAATATATTAAAATTTCTCAAACTCTGAGGATTTTCCAAGTTAAAGAACTTAGCAGCAATCGTTAATGGATGACTCATCATATTACTTATGAGCTCTAATGTTGATCTTTGCAAAGGAACGTTTTCGTCTAGCATCAGATTCTCAATCGTGGACCAATATACTTTTGTAGATACGATATGCTTGCAAA…	398168	-	ATGACTCAT		AT		RY		24.9325	1.03493	YOR034C-A	YOR034C-A	G-SELEX
Peak_482	15	405694	406046	TTACTTGAGAAATACTAGCTTTTTTCAAATTATTCAAGATTAAGGGACTTAGAGAACTGATAGAAAAGCAGATCATGGGCAGTAGATCGGAGAATGTGGGAACAGTGACTAGAGAAGGCTCCAGAGTGGAACAAGATGATGTCCTCATGGATGATGACTCTGACTCATCGGAATACGTGGATATGTGGATCGATTTATTTCTTGGGAGAAAAGGCCATGAATATTTCTGTGATGTCGATCCTGAGTACATCACTGATCGTTTTAATCTGATGAACTTGCAAAAGACAGTTTCAAAATTTTCCTACGTGGTACAATATATTGTGGATGATTTGGATGATAGTATCCTAGAGAAT	405857	-	CTGACTCAT		CT		RR-YY		4.66971	0.859814	YOR039W	CKB2	G-SELEX
Peak_483	15	412596	412911	GTTACCCGCATAATAAAGTCGTACATTGTTCGAAAAATATCACTCAAAAGCAGCATTGATCCGGTATAAAACAATAGAAATTTTTTTTTTTTTTTATTGTTATAATTATTCTGACTCACGTCTGGATTTCGTTAGTTCGTCATTTTTTCTTAATTTCAGTAAACTGTGATCACGAGTCTGCAACATCATTATACACCGTATATCTGTATTATTAAGAATCAGGGTCTCCTTTTAATTTGCTGTTGAAAAACATCTTAAGGGAGTGTGATTGTCTGTTGATGTATACTAGTCTGGTAAAGCTAAATATTCTTATAAA	412710	-	CTGACTCAC		CC		RR-YY		4.27079	2.34819	YOR044W	YOR044W	G-SELEX
Peak_484	15	426435	426826	ACAAAAAAAGAAACGAAAAACCAAAGACCAACCAACAGATTAGGTTCTTGCGTAAGGCGTTTCAAAGGTTAAGCACCACTTCTTGATTATTAATATTATTAGTTATACGTTATATAAGAGTAAGTGGTTACAATGAACGGTCTCTCTTGATGAGTCAGGATAGATGAAGAAAAAAAAAAAAAAAACGAAGAGACCATTCAAGTAATTTATACATGTTATTTTGTAGAGAAATGCATCAAAAGCGTTCTTTTCCCTTGTGTAACATCAATGCCGATTAGACGTTACAATGCAGTTCCCAGTGAATTAGATGTGTGTATGATTTAACCATGATAGGTGTTTAAATTTGTATCTTTGGAGCCTTAGTTTGTTCAGCTTCTAGCTTATCAGCGTTT	426588	-	ATGAGTCAG		CT		RR-YY		3.70761	0.982281	YOR051C	YOR051C	G-SELEX
Peak_485	15	430467	430730	GGTTTAGAATGTACGTGTCCCTTTTTGCCGTACCTTTTTTGGGAGTTCTTAGATAAGGGGCTGGCTACAGAATATCTGTTTCCTCTATTGTTCCATTGGAAGTTCGACTTCAAGTGCGGTGTAACGTTCCCCGTGCGTGAGTCAACGGAAACTGCGCATCTTAATAAGGTACCCTGTCCACCGCATGAGGCACAGAAGTGCTTTGGCTTGCCGTCTTTTGGTAGAGGAAATATTTTGAAACAGGCGTGGCATCTTAGCATATAA	430607	-	GTGAGTCAA		TC		RR-YY		2.94497	1.14777	YOR054C	VHS3	G-SELEX
Peak_486	15	472951	473305	TGGAACAATCACAATTGCGGTCCAAGAGAAGGAAGCAAAATGAATTATACGCCAAGCAAAAGAAATCAGTGAATGAGACAGAGGTCACTGATGAAGTAATTGCGGAGCTTCCTGAGGAATTGCTAAAAAATATAGATCAGAAGGACGAAGGTAGTACGCAGTACTCATCTTCAAGACATGTAACTTTCGATAAATTGGATGAGTCAGATGAAAATGAAGAGGCATTGGCTAAAGCTATAAAAACTAAGAAAAGGAAGACATTAAAAAATTTAAGGAAAGATTCGGTGAAAAGAGGAAAATTTAGAGTTCAATTGTTATCCACCACACAAGATTCTAAAACATTACCACCAAAGAA	473153	-	ATGAGTCAG		CT		RR-YY		4.55238	0.681124	YOR078W	BUD21	G-SELEX
Peak_487	15	473544	473817	ATCATGAGGTAAAACGACTTCCTGTTCAACGCTGAGATCGTGATCATGAGAATCTCCACCAACAAATGCTGTGAAAGACGCATATAGTAAACTGCCACCACTCATAAGCAGAAGATTTCCACTTATCCAATCCATCGTTGGCGAATGACTCAGATTCAAAAGGGATAACACTATGTATCCGATCGGAGTCGATGACGCAAACAAGAAAACGTTACAGATCACCTCCCATTTCATTAAGTTTTGTCTCGATACCATCAAACTAGTGAGGGAAAGA	473692	-	ATGACTCAG		AG		RR-YY		3.0271	1.72048	YOR079C	ATX2	G-SELEX
Peak_488	15	501634	501985	AGAAATCAGAACAAATTTCGAATTTGTTACTTTAATTATCTCAAGGATCTCACGCAGAGAATACGTTTCGAATGAGACTGGTACAGCTGCCATGCCGGATATGAAACAGCCTAATAATGCAATAGTAAATTCGATGACATCATTTTTATTGTACCATAGTAAAATCTTATCCATTTTGTAAAGGTGACTCTTATTCAATTCATGTGCTACCCTCTCCGCTTTCAAATAAAGTTTATCCCATGTGATGAACGTTTCTTTGCCTTTAGAATTTATGCTGATCATCGCTGTTTGACCATCATAATGTTCAAAGCGTCCCCGTAAAATTAGCGGTAAAGAATCCGTCATTGCTGAG	-	-							-	0.95068	YOR093C	YOR093C	G-SELEX
Peak_489	15	513054	513544	ATTTATACTATTTAAAGAAACAGAATAAATTATAACTCTTTTTTTTACATATCACATTTATATTTACTCCATTGCGTTACAAATATGAACGCTTCGACAACAACGCCAAGGAAACCGGGATAACCCAACTGATATTTTCTACCATACACTGAACGAAATTGCAGAACCAAAAAATAACAAAAAGTTCCCAAAAGGAATGCCAGAAAAAAATGGGAGGCAGGTCCACCTAACAAAAATTTAATCATATGCCATACTTCTTGAACAGTGAATGAGTCATCTCCACACCTAAAAATGTGGCCGCATTGGCTGGGAAAGATCTTAGTAAAGCAGGACCTAAACCAGGGAAAAATCCCTTGATACCACCTCTTTGTAGATAAATTTCCTTTGTGGCGGAAAGCA…	513326	-	ATGAGTCAT		AT		RY		17.224	4.32913	YOR100C	CRC1	G-SELEX
Peak_490	15	522504	522995	TACTTCATTTCATCACGCTCATATTGTTTGTAACTTTAGTTTTTATTTAATTTTACGTACATGACACTGCATATAATTATTTCACAGGCATTTAAAATAAGAGCATTGGGCACAGTCTTCTTTTATATGTTGTCATATTCAAACACTAAACATTTATCTGTATAGTAATTAATGTTAGCTCTTCCTTCTGCATGGCGCTTGTTATATACTTCATTCGTCTATTTTGGTGCCGCGCGCCATCATGGTCCGGTAACGGTCGTAGTGAATGACTCATATTTTTCCATCTCTTTCGGCCTTGCCAAAAAATGAAAAAAAAAAAAAAAAAAAAAAAAAAAATTAAAAACGATGTCCAGAATCACAACTACAACATAGTTTTGCCTCTTACTGGCTTGATTGGAA…	522773	-	ATGACTCAT		AT		RY		31.0688	1.17852	YOR108W	LEU9	G-SELEX
Peak_491	15	570825	571277	GAATTTGAGTTCCCTATAGGTTAAAGAAAAGTTTCTACGACAAAGCATCTACGCTTTAACAATTAACTATACCCGTGCTTCGATAATTTCACACTTTTCTGAATCTATCGACGCCAGGAGCAGAGAACTTATCATTGGCGATTCTTGACGCTGCGGCCACAGCGGCCACAGCGGAAAACGTATATGTCACATTTTTCGAGCTCAAGGTGAGTCACGATGCAGAACTGGAACGTACTAGGACTAAGTTGCAACGATGAAACTACAATGCTACGCTTTCTTCGTGCTAAGTACTCATTGTATCCATTAATATGGTCCACAAAAAGGGTAGGCTGCTGTTGTGCTTCATTAAGACTGGTCAAAAACACGGATCCAGCAGCAACAGCACCTGCATGGATGGAA…	571035	-	GTGAGTCAC		GC		RY		20.9785	3.94908	YOR130C	ORT1	G-SELEX
Peak_492	15	607501	607967	CAATCTCTGAGTGCCCAGGAAACTCCGAGTCTAAAATTTTCCATTTACAATCTATCTTTACCACGACTAAGACTGAACCATTTTATTTCTGATATTCTGAGTGCCAAAACATTTTCTGGTTCAATTAATAATTCTCTTTTCAACTTATTTAAGAGGCAACAAAAGTTAACAGCAGTTATTGAAAATAATAACAAAAATAGGATGGCAAGCTCGAAGTTTGATTTCACGGACAACAATCAGGAAAATTACCGCACAGTGACTCATCAGGATGATCCGAATTATGTAACGACGTTAAGATTGAACTTTATCAACATTAATGATTTAAAATTTAATGGCGATGGTAAGTTCAACTGGTTGAAAGACGGCCAAGTTGAAATACTTGCTGACATAATGCTAACA…	607760	-	GTGACTCAT		GT		RY		11.0876	1.21621	YOR147W	MDM32	G-SELEX
Peak_493	15	656406	656651	GAAGTGCGAAATAACAGCGAAAACGCTTCGCATAACAATGAAACTGGGCCAATTGAGACTGAACTGGCACAGACAATATCCAACGAATTTTGGACGGCGTACAACCTTGGCTGGGAGGAACTAATGAGTCAGCCAGATTATAAATATTTATTTGATACGCAGTAGAGGAGAAGTTCTTTTACAAAAAAACATGCTTGCGACAGCAGCTAGATAGAAAACTTGCATATTGTAATGGAAGACAGTCGA	656533	-	ATGAGTCAG		CT		RR-YY		2.83937	2.1631	YOR173W	DCS2
Peak_494	15	682288	682667	ATAGCAAGCTTATACAGCGGAAGACAAAAAAACGGGTAACTGACATTGTATATATTCACCTTGAAAATAAGTGCTAACGCCATGTAAGGGTATGGCCCGCTTAAAGGGCAAGTTCACTCCGCTCAAGATACAAAACTGAAACGATGAAGAAAAAAAGAGCATCTTGACCTCCCGTGACTCATTAAGACCACTTGAGACCACTTGCTCTATGTGTATCAACCTATAAACTGTATATCTTTTGCATTTTGCACCTCCTTAAGGAAAGAAACTCCCTTCGAAAGTATTATTTCCCTGTGGCCCCTTACTTCTCTAATTGACAAGACAGAATTTTCTCGATAATTCCCTGGATAAAGTGTCAGTTTATAGAGTAGATCTCACTT	682465	-	GTGACTCAT		GT		RY		7.07497	1.66475	YOR185C	GSP2	G-SELEX
Peak_495	15	721622	722012	TTTCTTAATTCTCGTTTTAAGAGCTTGGTGAGCGCTAGGAGTCACTGCCAGGTATCGTTTGAACACGGCATTAGTCAGGGAAGTCATAACACAGTCCTTTCCCGCAATTTTCTTTTTCTATTACTCTTGGCCTCCTCTAGTACACTCTATATTTTTTTATGCCTCGGTAATGATTTTCATTTTTTTTTTTCCACCTAGCGGATGACTCTTTTTTTTTCTTAGCGATTGGCATTATCACATAATGAATTATACATTATATAAAGTAATGTGATTTCTTCGAAGAATATACTAAAAAATGAGCAGGCAAGATAAACGAAGGCAAAGATGACAGAGCAGAAAGCCCTAGTAAAGCGTATTACAAATGAAACCAAGATTCAGATTGCGATCTCTT	-	-							-	4.40013	YOR202W	HIS3	G-SELEX
Peak_496	15	731686	732110	TAAATTGAGATAAACTCCGACACTTTACCTGTTCTTCTCAGATGTCTGAACTGAGTAACGAATTTTGTTGGGAATCTGATTGAACCAATTAAAGTACCATTCAAATAAACACCATAGTTTAAATGCAAGGATGCACTGTCAATCAATGTTATGTCTTCTACACCAAGAACATAACATAATTTCTTTATAGGTTCCTCTTCGTCATCTGTAGTAATATGAGTCATTAATGCTAAATTTTTCACTAGACCACACGCCTCACCTTCTGGAGTATCTGCAGTACAAAGCATACCAAATTGAGAAGGTTGTAATGCTCTTGGACCGGAAACTTTTCTTGATTTTTCAAACTGAGAAGAAATTCTTGTCATCATACCCAATGCGGAAATATAAGATAGTCTGGAA…	731905	-	ATGAGTCAT		AT		RY		11.8385	0.732521	YOR207C	RET1	G-SELEX
Peak_497	15	735902	736156	TCGCCACTATTAGTCCATTGTTCTGCAGGGTGTGGAAGAACAGGTGTTTTCGTTACCTTGGATTTCCTACTAAGTATTCTTTCACCTACAACAAATCACTCAAACAAGATTGATGTTTGGAATATGACTCAGGACCTTATCTTTATCATAGTGAATGAATTAAGAAAGCAAAGGATTTCAATGGTACAGAATCTAACTCAATATATCGCTTGTTATGAGGCATTATTAAATTATTTTGCCCTGCAAAAGCAGATA	736029	-	ATGACTCAG		AG		RR-YY		2.67511	1.45103	YOR209C	NPT1	G-SELEX
Peak_498	15	757997	758528	ACTTAGTCCTCTTCTGTCGTTGACATTCAATTGCTTGTGCATTTCTAACATGAAATAGTGGTACTACGAATGCTATTATTCTATGCCAGGCAAATTCCTCTGGAACTTTTTTTTTTTCAGTTTTTTCGTGGTGAGCTTTTTTTGCCTGTCTATCTCGAAAGATCTTGTTGTTGATGACTCAGTGCAGTCGCGATCACTTTCGACTCGACATGCATTTGCAAGTAATTCTGTTATAAAACGTTCTCTTCGTTTTTTCAGTCTGAAGCTCTTCTGCACTTTTTTACTGGGTTAGATTCTATATAGTCAAGTAATTCGAGGTAGCATCAAAGTAATATGTCATCAGACTCAAACGCAAAGCCATTGCCTTTTATATATCAGTTCATATCAGGTGCCGTCGCC…	758174	-	ATGACTCAG		AG		RR-YY		5.1273	2.38218	YOR222W	ODC2	G-SELEX
Peak_499	15	771175	771694	TCTAAGAACGGGTCGTTGGCTTGGTTCAAAGAGGGTATAAAGGTCCCTATTCACATTGTACAGGAATTGATGGGTCCAGCAACCAGCTATGCCAGCATCCATTCTTTAACCAGACCTGGTGATCTACCTGAAAAGGATTTCTCATTAGCCATCTCTGACTTCGGCATTTCCAATGATACCGAAACCATTGTGAAGTCTCAGAGTAATGGTGATGAAGAAGACAGTATTTTGAAAATCATTGACAATGCCGGTAAGCCTGGTGAGATTCTACGTACTGTTCATGTGCCTGGTACCACTGTGACTCACACCGTAAGATTTTTCGACAATCATATCTTTGCGTCTTGTTCAGATGACAATATTCTGAGGTTCTGGGACACTAGAACTTCCGACAAGCCTATA…	771476	-	GTGACTCAC		GC		RY		9.23383	2.30953	YOR230W	WTM1	G-SELEX
Peak_500	15	824527	824928	GGAGAAGTATAGTCATGGAGCCCATGAGAAATATTATGGTGGTGGTTTGTTTCATAGTTATTATTGTAGTTGTTTGTTGAGATACTGGTTGCATTAGAATGGCTATGGGTGTTGTTATTAAGGTTTGTTGTAGTATAATTTGTAGTGGTTGTGGTAGATTTCATGGAATCTGTAGATTTCTCGCTTCTTAGTGAGTCATTACTTTGTTTTCTACCAATGAAGTTTAAGAAAGATTTAGAACTTCTGATCAACTGTGGCGGGTTATTAGACGAATTTTCACGGTCATGATGATGGTCATTATGATGACCATGGAATGGGTTTCTCGACAATAGATTAGGCATCTTTATACGAGAAATAGTTCTACCGTATTATTATAATTATTAGTGTTATTATTTTTGT…	824721	-	GTGAGTCAT		AC		RY		8.00187	1.40937	YOR267C	HRK1	G-SELEX
Peak_501	15	854107	854589	GCTTAGAAAATAACCCTCGTTAGTTAGTCTTAGAAACATTAAAAAAAATATGCTTTTATACATTGATCAAGCTTAAAAATTGGACGCAACCGGAATCGAACCGATGACCTCTTCCTTGCAAGGGAAGCGCGCTACCAACTGCGCCATGTGCCCTGATGACTGTTGAAACTGTTGTATCTCAAAATGAGATATGTCAGTATGACAATACGTCATCCTGAACGTTCATAAAACACATATGAAACAACCTTATAACAAAGCGAACAACATGAGACAAAACCCGTCCTTCCTTAGCTGAACTACCCAAAAGTATAAATGCCTGAACAATTAGTTTAGATCCGAGATTCCGCGCTTCCACCACTTAGTATGATTCATATTTTATATAATATATAAGATAAGTAA…	-	-							-	1.14242	YOR289W	YOR289W	G-SELEX
Peak_502	15	874584	874918	AGATCGATATATACATATATATCTGGATTTCGAGAAGAAGGATATATTTTATTGCTTATTTGTCTTTTTATAAAATCTCTCCTAAGTTAAGTTCATGGGGAATCTGACTCTAAAAATGAAATCTTAGAAATGCAAAAAAAAAGAAAAAGTATGGGTGAGTCAGTTTCTTCCAAATATATACAAATGGTCATCATTTTCATTCCAAAGTTTCTTTACCAGGTCAACAAAACCATTATTTTTCGTTTCCAATTCGTAGATACCGTACAGGGACAACATGGATCCTCCATAGAGGCAATAAAGGGCGAGCTTATGCCATCTTGGATACTTTTCCTTCG	874742	-	GTGAGTCAG		CC		RR-YY		4.24733	0.947234	YOR297C	TIM18
Peak_503	15	882206	882631	TCTCGTAGTGGGTGCCACTGCCGCATTCACAGTTATTTTCAGCTGTGTTCCCGGCCGTCGTGTATGATGTAATCCATCACCCCCCTATAAAAACACCTGTGCACCGCATATTTCCATAGCGCGTGACGCTAAGTACAAGAAACAGCGAGGGGCCGTTAAGTGCAGGCTTTACCGAGGGCGCCGGCTGGCGCTTCCCGTGGAAGGGTGTTTGACTCATCATCGCATCGCATTACCTCATGATGAGTAAATAGTTGCGATTTCACTTATCACCTCTCGCGGAAAAAAAAGGCGATGACATGATATATAAGGCTCTCTCGTAAGACACTTAACTATCCAACGTTCATTAGATTATTCGGTCAATTTCTTTTTTCATGCCCCTCCTTTTTCTTTTCTTTTCTT…	882418	-	TTGACTCAT		TT		RR-YY		9.56235	-	YOR302W		G-SELEX
Peak_504	15	882878	883442	CCACTCCTAAAAATATTTCAAATGTCCTCCGCTGCAACAAAAGCTACTTTCTGTATCCAAAATGGTCCTTCCTTTGAAGGTATATCTTTTGGTGCAAACAAATCTGTTGCTGGTGAAACAGTTTTCACTACTTCTCTGGTTGGTTACCCAGAGTCCATGACTGATCCTTCCTACCGTGGTCAGATATTAGTCTTCACGCAACCCTTGATTGGTAACTACGGTGTCCCATCCGGCGAAGCCCGCGATGAATACAATTTACTGAAGTATTTTGAATCTCCGCATATACATGTGGTCGGCATCGTTGTCGCTGAATATGCTTATCAATATTCGCATTGGACCGCTGTTGAATCTCTGGCACAATGGTGTCAGAGAGAAGGTGTTGCTGCTATTACTGGCGTA…	-	-							-	-	YOR302W	CPA1	G-SELEX
Peak_505	15	890297	890716	ATGCCGCAGACATTTATAATCATAATCAAGGTGTAGGCGTCATTAGCAGAAATTCCATGGCTGGTGGCGTATGATCCATAATAAGTAAGAGCTGAATTAATGGATAACTCACTAAATACCGTTCCCAGGACACAAAAAAGATATTTCATATCCAGGAAAGCCTTCGCATCAAAACATTGCAGAATATAAACTCTGAGTATGTATCTCCAACGTGACTCACCATCTTTGGAATTTTCGATAACATGTGGTAACCTCTCTTTGACTAAAATGATTGACAGAGTTAGCAAAGCCAAATCTAAAAATCCTAAAGTTCTAATGCCCCAAACAAATCCATAAGTTGGATCAGTGTCTGACTTCATAGAGAAGAAACTACGCAACATAATTGGGAAAACGACGCCA…	890512	-	GTGACTCAC		GC		RY		10.3719	0.911844	YOR306C	MCH5	G-SELEX
Peak_506	15	953803	954299	CTGGAGAAAGTGTTAGCAGCAAATACCAAGATTCCGACAATGCCGCTCCTCTGCATGACGAATTATAACTACTCGCAGGAAGAGTTCATTACGCGACGGTTCCAAGAGCGTGAAAGAATTGCTTCTGCGCATAAGTCTTCTTCCATAATAGATTTTTATATCATTTTTAGAACATAAAATTTCTCGCCAAGAGTTTTTTAAGTAAAAGCAGATTATCCAGTAACATGGGTTCCGCTTTTTGAGCGAATACTATGAACGAGTTTTGCCCGTGCTCCCCATGACTCATTAGATTCTTTGATGACAAAAGATCACTGGCAGAAGTCTGTTTCGCTTCTTTTCTTTTTTTTTTTTTTTTTTTTTTTTTTCGAGCAGATTGCAATCAGCGATGAGACAAAAATG…	954084	-	ATGACTCAT		AT		RY		20.9433	2.88102	YOR337W	TEA1	G-SELEX
Peak_507	15	1005877	1006164	GCTAGTTAACAATGACAGTTATTCAAGTTCTATGACGGACATGAAAAATATGTCTTCTAACAGTTCCTTCTCAAAAAATTTGAATGTAGGGAATCTGGCCTTTTCATTAAGTCCAGAATTCAACATACCTTATTCCACTTCTCCAGTGTCACTAAATCTTTCCCCATCGATGAGTAATAATCAGCAACAATTACTGACACCTAATTCGGCATCGAAGAGTAAAAACAATAATAAAAAAAGAAATTACATGGATGAAGATACTAACGAGTCAATGACCGAGCCAAAGAA	-	-							-	1.04692	YOR356W	YOR356W	G-SELEX
Peak_508	16	24781	25501	GGCGCTCGCATTGTTAAGCAACAGGCGGTGCGGCAACGTTGAAATGTTTCACGCAGGGTTTTTTACGTACTGCACGGCATTCTGGAGTGAAAAAAAATGAAAAGTACAGCTCGAAGTTTTTTGTCCATCGGTTGTACTTTGCAGAGTATTAGTCATTTTTGATATCAGAGTACTACTATCGAAGCATTTTTACGCTTGAATAACTTGAATATTATTGAAAGCTTAGTTCAACCAAGCTGAAAAGAACCATTATTCAACATAATTGGAAATCATTTCGTTACTAAATCGTCCGAAAATTGCAGAAAAATGGCACGTCTTCCTCTAAAGCAGTTCTTAGCGGATAACCCCAAAAAAGTTCTTGTTCTTGACGGTGGTCAAGGAACAGAACTGGAAAACAGA…	25248	-	ATGAGTCAT		AT		RY		27.4551	2.7964	YPL273W	SAM4	G-SELEX
Peak_509	16	32598	32997	AGGAAGATTTGAATGAGAGTAAGGAGCATGATGACCAGAAAAAGGACGATAATGACGATAATGATAATAATCATGATAACGACAGCAATAACCAGTCTCCAGAGACGAAAGACAATAATTCAGATGATATTGAAAAATCTGTCGAACATCTCCTGAAAGACGCGGCAAAGGAGGCTAATCCAATTAAGATCACACCACAACCGTGAGTCATCCGCATCGCATATACCCATTCTTATCTCGCACATTTAAATATATACTATATATAATACTGTTAAATGCCAAATAAAAAGGATTTTCATTACCCGAATCGATACTTTTGGTAGCATAAACAAATAACATTGAAACAATAACAAAGTGTAATGTGGCCGCACGAATCTTTGTCTGTAACAGCCTTAAAGAT	32804	-	GTGAGTCAT		AC		RY		8.2248	2.14294	YPL269W	KAR9	G-SELEX
Peak_510	16	39424	39838	CCTGTGGAGAAAAAGTTAGAAATCATGCTTGGAGATTTTATGAAGACTGAATTACCATACTTTGATATCTGTATTAGTAACACTCCTTACCAGATCTCATCGCCTCTGGTTTTCAAATTAATTAACCAACCAAGACCACCAAGAGTATCTATTCTTATGTTTCAAAGAGAGTTTGCTTTAAGATTACTGGCAAGACCAGGTGACTCATTATACTGTAGATTATCCGCCAATGTACAAATGTGGGCTAATGTTACACACATCATGAAAGTGGGTAAGAATAACTTCAGACCGCCACCACAAGTGGAATCCAGCGTTGTTAGACTAGAGATTAAAAATCCAAGACCGCAAGTGGATTACAACGAATGGGATGGTTTGTTGAGAATCGTCTTTGTGAGGAAA…	39627	-	GTGACTCAT		GT		RY		11.6626	1.13862	YPL266W	DIM1	G-SELEX
Peak_511	16	44279	44635	CACTATAAGTAAGATAAGTCCATAATTAGGCTTTAGATAATCTTTACTAATTCTTTGCAGCGTCATTGAGAGAGGAGGTGTTTATTCTACTTTTCTGTTGGGGCAGCTTTCGTGAATGTAATAATGAGATAATTTTCCCTGTCTCCTTTGTTTTTTTTTCCAGATGACTCAATTAGTGACTAAAGAAAAGGATGCCATATGGAAGACAGATATCTATAAAAAAAAAAAATGCTATAAATACTTTTTAAACTCAACTACAAAAGCGAAAATGTTTACCTTCTTTTGGAAGGTTTAGTAGTCGTATCTCTTTCAATGATTCCGCCTGTATCCTCCAGACGCTCTTCCTCAAGGGTCACC	44446	-	ATGACTCAA		AA		RR-YY		7.13363	3.67027	YPL264C	YPL264C	G-SELEX
Peak_512	16	73940	75293	CTATTATTATGTATATTAGGCATATATATACATATATATATTTTGCATACATATTCATTTTTAAAAAAATGCAACTGCTACACGCTTTGAAAGATTCAATGAAAAGTTTTTCCGACGACCAGAATTGGCTAGCAAAAAAACGAAAATGTAATGGAGTCATGCAAACATGACTAATAGTAACAAAAAAAAAAGATATAGTAGAATTGAGTAAGTAAGTTCTATGTATATTGTTGTTATTTTCTCTAAAAAAAAAAAAAAACTATGTAAAATTAGGAATTAAGAATATGCTTGGAAGGAATGCCGATTTAAAATGTGTAGGATATGCGATGCAAGGGGTCGTGAGAACAAGTAGAGATGTGGTAAAATGCGTCATACCGATGACAACCACAGTCTGTAGTT…	74528	-	CTGACTCAT		CT		RR-YY		11.557	12.0338	YPL250C	ICY2	G-SELEX
Peak_513	16	189913	190205	ACATTATTGCGTTTGTTAAGTTACTCCATGGATTTTTTGGAAAGATGGCATGAACAATTGAGCCGCCAACCTTCGATAGATTACGATGATAGACGACCTGAATTCAGAAAAAGTTTATCTGGTTCTACTCTACAAACCATTTATGAGTCAGGTAAGAATGTTCTGGAGGAAAAGGAACGACTGGTAGCAGAACATCACATCCAGGATTACAACTTTATCAATTTTATCGCTTATATTACTTACGCGCCATTGTTTTTAGTGGGCCCAATTATCACTTTTAATGACTACCTTTA	190059	-	ATGAGTCAG		CT		RR-YY		2.68685	1.0889	YPL189W	GUP2
Peak_514	16	191441	191963	ATGGTATAGGTTCTATAGTACGTTGGATTCACATTCCCTAAAGTTACAGAGCGGCTCGAAGTTTGTAAAAATAAAGCCAGTAAATAACTTGAGGAGTAGTTCATCAGCAGATTTCGTGTCCCCACCAAATTCCAAATTACAATCTTTAATCTGGCAGAACCCTTTACAAAATGTTTATATAACTAAAAAACCATGGACTCCATCCACAAGAGAAGCGATGGTTGAATTCATAACTCATTTACATGAGTCATACCCCGAGGTGAACGTCATTGTTCAACCCGATGTGGCAGAAGAAATTTCCCAGGATTTCAAATCTCCTTTGGAGAATGATCCCAACCGACCTCATATACTTTATACTGGTCCTGAACAAGATATCGTAAACAGAACAGACTTATTGGT…	191687	-	ATGAGTCAT		AT		RY		19.8639	2.44076	YPL188W	POS5	G-SELEX
Peak_515	16	197983	198237	TGGAAACGGATATTAATTAGACAAAAAAAATGATGAAGAAAGATAAAGTGAAAAATATGAGGCTGGAATGGACAGTTGAACCAATTAAGGAGCCTAATTGGTAAAGCAGAACAGGTGAGTCAGAAGACTTAAAAAGGGGCAAATATCAAATAACGGAAGAACGAAGAAAATAGAAGAATACAATGTTCAAAAGAAATGAAGCGTATGTGTATCTAAAGGAAAGGTACAGAGACTATCAGTTCTAGAAATTGTAAA	198101	-	GTGAGTCAG		CC		RR-YY		2.94497	0.703947	YPL184C	MRN1
Peak_516	16	224629	224912	CCAATCTGTGATATTAAAATAAGACAATCCGAAACATAAAGGGAACATTAGGATAGAGTATCTCAACGACACACGGGCGTTTAGGAGCGGATTTTTCCATGCAGTCATAACGTATCCGGCATTTTTGTATTCATTTCTAATGTTATGACTCAACGTATTAAAGTGTGGGAATTGCCAAGCAAACAATAGACCAGCAAGGCACCAAGATCCCGGATGTGAAAGCGGACTTGCGGCTGCCCATCCCATTAGAGGAGGTACCATTCCTACTAGGGCACCTAACCATG	224777	-	ATGACTCAA		AA		RR-YY		3.01537	1.18711	YPL172C	COX10	G-SELEX
Peak_517	16	246666	246978	GGGTAAGAAATAATTAGACGAAGTTTCTTTCTGATGTGTATTGAACTAGTGCTCGTGCTTACATACACATCGCCCATTATTGCCTATAGTTATCCTCACTTTATACGAGGTCTGGCCGTTAACGGTTCTTTTACATTGAAAAACTAAATCAGTCACCCACGCAAATAATGAAAAAAAAAAAAAAATCAAAAGCGAAAAGAAACCTAACGCATATTCTATTCAAACGTTGAATGATTGTATTATTATAAATCATAATCACGTAAAGCCACCGAAATTTTTTTCCAGAGTGAAGAATATAAAAAAAATATCTTTA	-	-							-	0.897505	YPL160W	CDC60
Peak_518	16	287076	287398	TAAGCAATAAGTATGTTAAAACCCTTTTATTTTTCTGAGTCGAGCAGATTTTTGTTCGACCGTTGTATATAGGATAATATGACGCCATATGATTTTTTCCTCTTTGGTAGGGAGGGAAGAAATTTTCCCCGCGCGGCTGAGTACAAAAGCGCCTAGTACTCACTTGAGTCATAATTTAGCACATCATAGCGTGCCTGCCAGAAAGACTTGGATGCGCATTTCTATTTGATGTAAGTAAGGAAATAGGAGAACTTTCATAGCCCATGGCTAGTTCGGTTTTCAGTAAACTATATACGTATATGTTAAGAATATTTCGGAGTGTC	287243	-	TTGAGTCAT		AA		RR-YY		4.34119	0.762497	YPL141C	YPL141C	G-SELEX
Peak_519	16	296897	297664	TGCGTTTTTACCCCTCTTCCCTTTATTTTGCAGCAAAAAGAAAGATGGAAAGGCAAAAGTGAAGGCATGATGATGACAAACTTGAAAAGAAAGAGAACAGCGAAAAGAGATGAATAATCCATGGCAATGACTGCACGCTCATGGGTATCAATTGGCTAGGTCTAATATTGTTATTGTTTGGAGTATGGCGTAGAGAAGTGGTTCCTTAACCTTAATTAATGCCCGTGCCATGATGATTGCATCACTGAGACGTAATGTGGAAACACCACTTCTCGGTCCGCGGACATCAACCGAAGGAAAAATGACAAGCTATTTCCGTGTATATCCGCGCCAATCCCTTCGGGGCCGAAGTTCGGAGGCTTTATCTCCGCTTAGCCAAGGCCGTCAAAGGCGATAAGG…	297379	-	ATGACTCAG		AG		RR-YY		4.52892	3.33932	YPL135W	ISU1
Peak_520	16	338503	338733	CACCGGCGTCTGATGAATGTGGATGGGTATTGTCATCCTGGGCGTCCTGGTAACTTGCCCCAGAATAAGGTGGTGTTTCTGAACCGGAAACGATATCTGTCGTGCCAAACTGACTCATTGTTTTACGACCAGTTTCTATAGGTGAAGACTTACAGGGAAGTTGAGGATATCGACTCTATTTGTTACTTTCTCCAGCATACAAATTACCGATGATTCTGAGAAGAAAGAAGA	338616	-	CTGACTCAT		CT		RR-YY		2.35832	0.907128	YPL112C	PEX25	G-SELEX
Peak_521	16	339319	339679	TCACTTCTCATCATAATATTCCGCTGATTTTTACATACCGTATATCCAATTTACGGCCCTTCACATATAGCGGCGAAATGATGGTAAAGCTACGCATACTGTCTGACAGGACCCTATTCTAGCAACCTTACATGAAACAAAAACAAACAACATCACATCATACGGATGAACTACGGGTGCAATCCCTGACTCATCAATGTTTATCATAAACTTAGATATCAACACTGATAAACCCCACCTCTATTTTTACTGGTTCTTCACTTTTTCGATGCCGCACCGTCGCCCGCGATCCCCGCCCTTTGATTGCTCCTTCCATTAACAGTTTTTTTCTATCCCTTACAAGAAGCCGAGACGCCGCGAA	339508	-	CTGACTCAT		CT		RR-YY		7.02804	0.698112	YPL111W	CAR1	G-SELEX
Peak_522	16	373198	373457	GTCACTGGATGTATACAAATAATTAAGCATGTGGAAAAAGAAGGGGTGGGATAGCGTCAAGATGACACTTCTACTTTTTTGTGACACATCATCATGCAACCTATCGAGTCTCCCACGAGGTTGACAAATAAGAAATTGTTATCGTTTTTGCAGTGTATCGTATAAGGCAACAATAGCGATGTCTCCCATCAATTGACTGATAAATTCCTGCAAACTATCATTTTTTTTTTTTCATCCTTGTGCCGCGTCTGTAGCCGAAA	-	-							-	2.62869	YPL092W	SSU1	G-SELEX
Peak_523	16	439401	439718	CTCGTATCGCCTGTTTTTAAAGAAATCTCATTGTCTGTATTTCGGAATTTTACATTTTGTTCCAATGCTCCCTTCTTTAGGAAACGAAGTTTCATGATTTGTTTTATTGAACTGCTCCTGAATTAGTTCGGGTTTTGCGTTGTGCATTGACTCATCTTTGTTAGTAATAGATTCATCGGTGATATCTACACATCTACTGAGTCCAGTGTTTAAGATACTCCCAATATTTTTACTACGAATTCTGTCGGAGATTCTGTTTTCGTCATTGATTTTAATAGTATTTTTACTTCCTACCAGTTTCTCTTGTATAATCGATGG	439551	-	TTGACTCAT		TT		RR-YY		4.15346	1.21896	YPL059W	GRX5	G-SELEX
Peak_524	16	447940	448319	GCATCTGCATTTTCGGTACCTAACTCCGGCATATGACCTCTCTTATATAACAGCAAGTCACCTCCTCCCTCAACAGGTTTCAAATATTCTGATAAGATGACATTGAACACAATATAACCAAAAGTCCACACAATGTTCACACCCCAATTTCTCCAAGCATGCTTATATGCGAAATGATATTGGTGTAAGATGTAAGAGTCACCGCTAACATACAAGTTACCCTTAACCGCACCAGCAGCATCACAGACTTGGTTAGCAATAGAAATACCTTCATAACCAGGACCAGATGGGACTAAGGCGCTACACAACATTTCCCTGTGGTGAAATTCAGTGGAAACTAAACTTTCAAAAGCATAAGTTAAAGGATTAATGAAATGAAG	-	-							-	1.49726	YPL058C	PDR12	G-SELEX
Peak_525	16	486488	486772	ATCATCAGTGGCAAGATGCAAGGTACACACGGGCACCAAGAGATAATGCGCAAAATAAACCGGGTTTTATTTACATCTATACATACAGTAACCTCTTTGAATCATACATATCTGAAAAGACGGTAGATTTAAAATGGCTATTTATTGATGAGTCAATAGTTCGGACTAATGGTAAAAAGAAGAGACAATGGGTAGACAGAGACTTTATTCTATGTAAGATAGGAATGACCACTCGAAAAACAGTAGATTCAAGACTTTTAGAATGGCAAACCACATGCAAGCATC	486639	-	ATGAGTCAA		TT		RR-YY		2.54605	1.18333	YPL034W	YPL034W	G-SELEX
Peak_526	16	488201	488445	TCTTCATGTCAGATTTTTGGGCTCTATTACTAGTGGACCTGTGCTTCGGACATACGCAGTTTTTCTGTGGTTTCTTTATACGTCACAAATCTGTATTATTATTGAGTCACTAATTCAAATGCGTGTGACAATATAGCGACGGGGCCGTGCAAAAATAAGAGATACTGCACTTGCGCGGCTGATAGAGATTTCTTTCTTTCTACGCTGGGATAGTTTTCTTAGAAGGTTTTAGCTATTCTAATTAA	488306	-	TTGAGTCAC		GA		RR-YY		3.10923	1.45588	YPL033C	YPL033C	G-SELEX
Peak_527	16	497283	497717	TTATTGGCTTATTCGAGCACATGGAAGATATCCCATTTTTCGACAAGCTGAAACTAAGCAATGCGCCCGTGAAGGACATGCCTATGGTCACAAAGGCGTTCACCAAATTTTGCGAAACAATAGCAAAAAGGCATACAAGAGGCCTACTGTCATACCGATTACCTTTTAACCTACTGGACTACAATTGCATACCGAATGAGAGTTATTCATTAGAGGTTTATGAGTCATTGTACAACATCATTACTCTATACTTCTGGCTCAGCAACAGGTACCCAAACTACTTCATTGACATGGAATCTGCTAAAGATTTGAAGTATTTCTGTGAGATGATTATTTTCGAGAAACTTGATCGATTAAAGAAGAATCCTTACGCACATAAGCCCTTTGGTTCTACAAGAG…	497506	-	ATGAGTCAT		AT		RY		10.5831	0.984922	YPL028W	ERG10	G-SELEX
Peak_528	16	518256	518690	AATGTTCTATAAATTTGAAGATTCCACACTGCTGAAGTGGGAAATCTTGCGAATTTCCACAAACGTTAGACTGAAGGCCAAGCAATTACTGGCAACACGTAACTTCCAGAAGTGTCTATTAAGCCTTTATGAGTTTGATAAGATCAAGTCCAAAAAAACTGGAATTTTCCAAAATTTGATTAATTTATTGAAAAGGAAAACCAGGTGTTATCTAATGAATAATAGTGACTCATTAATTGTGGAAAGAGTTATTAGAGAAGGAAGACTCACGACGATAAAATTGCAGATAAATTTCATCATTACAATGCCCGGTGAGAGAGGCAAACCTCGTAACTGTTTTCTGCCCATGAGTAAAATTTCAATAGCGCTATGGAAGGGGGGAGAAAGATTTAACCAGAT…	518484	-	GTGACTCAT		GT		RY		11.5218	1.34121	YPL018W	CTF19	G-SELEX
Peak_529	16	537401	537661	TAAACCAAGGTCAATTGTAACGTTTATCTTTTCATTAGATTTTCTTTTCATACTTTTTGTACTCCTCTCCTTCGAACTCTCCATGTCTTCTGAGTCTGAGTCACTAGAACTATCAGTAGTATTGCCTTCTGATTCATTGTCCTCGTCTGAAGAAGTGTTGAGTTCCTTGCTAGAGAGATCAAGCTTGACGCTAATTTTGTTCTGTTTCAAGTTCAAAGGCAAGTTCAAAAGCTGAGCAATTCTGTTGCCTTTTTTTTGTTC	537500	-	CTGAGTCAC		GG		RR-YY		2.51085	0.765228	YPL009C	YPL009C	G-SELEX
Peak_530	16	544873	545296	GGTAGCACTGAGAGATAACCTACAAAAGGCTCAACCTTTAATTTCCTCATGCCCAGCATGCCTCAAGAATTTTAATAACCTGTTCTGTCACTTCACTTGCGCTGCTGACCAAGGAAGGTTTGTCAATATTACCAAGGTAGAAAAGTCAAAAGAAGATAAAGATATTGTTGCGGAATTAGACGTTTTCATGAATTCGTCTTGGGCATCTGAATTTTATGACTCATGTAAGAATATTAAATTTTCTGCTACCAACGGTTATGCGATGGACCTAATCGGAGGTGGTGCTAAAAATTACAGTCAATTCTTGAAGTTTTTGGGGGATGCTAAACCTATGCTTGGTGGATCCCCCTTTCAGATTAATTACAAGTATGATTTAGCAAATGAAGAAAAAGAATGGCA…	545092	-	ATGACTCAT		AT		RY		12.8241	1.60473	YPL006W	NCR1	G-SELEX
Peak_531	16	576074	576366	CGCTAGCTCATATATTCTTTCGTTAAATTTTAAAATTTCTTATTCTAAATCTTCTTTACATGTTTGGAAAGAATTTATTGGAGAGAAAAATCTAGACCTGCCAAGCCGATAAACGAATGCCTGCGAAGAAATAGTGTAAATATTACTCCTGAAGGTAGAGTCATCTAGGCGGAGACGAAAACAAAGTTTAGCTTTTCGTGAAATTGCCCATTTCATGTTTATCAACCACCAAAGGTTAAATGGAGGTTTGACAAAAGAAATTTTCTTGCTAAAGGTTAGCATTTTTTTTGGAA	-	-							-	0.755101	YPR009W	SUT2
Peak_532	16	581894	582277	ACGACTTGAACAAGTAATCGCTAACCACATATTGAGATAAGCAGATAATCGCTGTTAAACGTCGTTGATACAGTCAGTCAATATGAATAGTGTAGTATTTTATCGTTAGGTTCACCTTCCAAATATTCGTTAGATAAAGATGTTTCGGTTTTTTATTTCAACAAAAGAGCCTTGTTGGCGCAATCGGTAGCGCGTATGACTCTTAATCATAAGGTTAGGGGTTCGAGCCCCCTACAGGGCTTTCTTTTTTATTGCATGGTCTATCATCAGGTTCCCTTAACCGCTGCCAAGAAAGAGCACGTGTAAAAATGGAATGATTATACATCAATTAAACATATAGTCATGGTGGTGTTGACATGTATATAATATACATTAGTTTTGTCA	-	-							-	-	YPR010C-A		G-SELEX
Peak_533	16	601592	602037	CCAGAGTAGAGACCTTTTATTCCTTCGCGGGATATAATCTTCAACAAACAATCAATTGAGTTTTTGTATTGGGCTAAAGATCTTTGGGCTTGCATCCTTGTTTTTATAAAGTCTATTGGGTATACTACAGTTGCACCAATACAACCCGCAATAGAACCCAAGGAGAAATTGTACAACGAATCGAAAATTGGATAAAAGTAGTAATTAATATACAATGACTCATTTTGATTTTTTTGCAATTCCATTTGGTGAACTAAGTCGTTCAGGTAATTTGGGTTCAAAATTTTCATGAAATCTTCAATTGTTAAGTCAGAACGCATCGTTGCTTTATCTTTTTTACCTCCAAATACAGATTCAAACAAGCCAGTACTCGCTTTTGAAGCTTTTTTAACACCAGAG…	601810	-	ATGACTCAT		AT		RY		11.158	1.43473	YPR021C	AGC1	G-SELEX
Peak_534	16	625087	625563	TGTTTCTAAAATGATCTTCTTCACAGAAATTGACTGATTGAAAAATATCTCGTATTGATTGCTTTTCATTTGCAGTGATAAATCAGTGGAATCCGTGTAGCTCAATATCAGTTGTCTTAGTTTTTCAATATTTTTCGCGTCATGGAACCTCACAGATAATTTTAATGCTGCTGTTAAAATGTAATTGATTATCTTCAGATTCGTTGCTGTGTAGAGTTCTTGCAAAGTTAGTAAGTAATCAGTAATAGATGACTCATTGATTATGTCTGCACCATTTTTATTGCCCTCGTTGAGTACTAAATCGCCATATTCGCCAATGCACCAAATCAAAACCAACTGCCAACCAATATTTTCCTCGGAAATCTCCGCTGATGTTCCATTTAGTGAAATTGTCAGCAT…	625339	-	ATGACTCAT		AT		RY		15.2998	0.977396	YPR029C	APL4	G-SELEX
Peak_535	16	645251	646320	CATTGGATATACCTTCAAATAAAGATATAGAAGACCGTAAAGTAGTAGTGGGTTTGAAGCCTAAATAAGTAGTTTTGTACGTACTATTATTTTAAGAGAAGAACATCCATAGAAAAGAAAAGAAGAAAAAGAAACGAACCAGAAGAGGGTAGCAGAATCAGTCATTCACGCACCCGGCCTGCGCTGCGTGCACCGACTGCGTGCGTGCGTGATTGGTAATGCAGTGAATCATGCTTTTTCATGACGCCTCCTCCCCGCCCCTGAGCCTTCGGTGGCCGCCGAAGTCGGGTATTAATGGGCGCCCCTTTCCTGGTGTCCGGGAACCGCCTGCCGAAAACCACCCTCCGCAGGTCCGCGGAAGGTGGGTGTGGCTGTCCCCGCGCAAATCCGAGATCGATT…	-	-							-	4.27905	YPR036W-A	SPO24	G-SELEX
Peak_536	16	650497	650835	TATTACTATTATTATTATTATTATTATTATTATTATTATTATTATTATTGTTATTGTTATTATTATTGTTATCATTATCATTATTGTTGTAGTTATTGGTATTATTATTGTTATTATGACTCACTGAGCGGCTTAGAGGATTCATTTGACTCGAATAACCAGAATTATTATAATTGTTATTATTATTACTTACATTTGGTAAGTTAACTATAGGTAGGGATAAATTTGTTCCATTAGCAATTCTAAATGAATCAAATTGTGAATTCAATTCATCTAATCCGTTAGAATTACCGTTCTGATTTTGATTTTGATTTCCGGAGTACACCACTTGTTGATTGT	650616	-	ATGACTCAC		AC		RY		9.96127	0.632057	YPR041W	TIF5	G-SELEX
Peak_537	16	673394	673693	ATTGAATGTTGAGATACCAGCCGCGGTGGAGAATATGACGATAACTGAGCTGACAGTGTCTGTTATAGCAGTGAACTATGGTCAAAAAGACTTGATAGAATAATGTAAATAAATTTCTTATGTAGTTTTTTACAGGAAGTAAAAAGTGTTATTACTTTGATTGACTCATTCTTACATTTACTGATAGGCCGAAGATAAGCGGCGCCCTAAGAAAACTCGAGCGCAAATTGTCAGCGATGATGTAGCCATGCTATAGCATCAATCAATGTCAATAAGCTAATAACAACTATCATCTATACT	673558	-	TTGACTCAT		TT		RR-YY		3.14443	1.72299	YPR058W	YMC1	G-SELEX
Peak_538	16	690140	690485	AAGCTTTTGAAGAAGGTGAAGGAAGGTATTGAAGACTTCGATGACATATACGAAAAATTTCAGTCAACAGACCCCTCCAATTCTTCGCATAGAGAAAAACTGGAATCTGACTTAAAAAGAGAAATCAAGAAGCTGCAAAAACATAGGGATCAAATAAAAACATGGCTCAGCAAAGAAGATGTAAAGGATAAGCAAAGTGTTCTGATGACTAATAGGAGGTTGATTGAAAATGGCATGGAAAGATTTAAGTCCGTGGAGAAGCTAATGAAGACAAAACAGTTTTCAAAGGAGGCTTTAACAAATCCAGATATAATCAAAGACCCTAAAGAACTCAAAAAAAGAGATC	-	-							-	0.894598	YPR072W	NOT5	G-SELEX
Peak_539	16	747134	747587	AATGGATAATTAACCCATACACCTCATACAAGATTTTGAGAGTAAACACAAATCAATGGACCTGTAGTCGGCTAGATCACAGATCATGATGAACTGTATTGTCGCAACAAACTTGTAACTCCAATAGTGATTAGCAACCCAGAATATCGTATTCAACAATAATTCGGTAGTCATGTTTTCACGAAGTGATCGAGAGGTAGATGATTTGGCTGGTAATATGAGTCATTTAGGGTTCTATGATTTGAATATTCCTAAACCTACTTCTCCACAGGCGCAATATAGGCCTGCTAGAAAGAGCGAAAATGGAAGATTAACTCCCGGACTTCCAAGATCATATAAGCCGTGTGATTCAGATGATCAAGATACCTTCAAAAATCGCATTTCATTGAATCACTCACC…	747355	-	ATGAGTCAT		AT		RY		16.5317	1.69498	YPR111W	DBF20	G-SELEX
Peak_540	16	757698	758124	GTCTAGCATTGGATGGTAATGCAAACGGATATTTTGGAATACCATTGAATTGCAATTCGGAAGCAAGACGAGGGTCAGATCTTTCACCTTTTGAGATGGAGTCTCCATTGTTCGAGGAAAACAGAACTCAAAACTGCAGTGGCTCTCGCAAAAGTTCAGCTTGTCATATTCCCCATCAATGTGGTCCAAGGAAAGAAGGTAATGACTCACGATTGATCTACGGCAATGAGAAGGGCGCCTCACAATCACGTCTAACGTTGAAGGAACCGCTTACATCTAAAGGTGTTGAAGCTCCTTATAGCAGTTTGAAAAAGACATATAGTGCGGAAAACGTCCCACTAACATCTACTGTATCGAATGATAAGTCTCTTCACTCGCGCAAGGAGGGAAGTACTAATA…	757903	-	ATGACTCAC		AC		RY		7.93147	1.15935	YPR116W	YPR116W	G-SELEX
Peak_541	16	768705	768973	TAATGTAACCGAAACTGGCGATGACATTATTGTGGAAGAACGTAACCCTGAGGAATTCAAGGTTGTTACTGGTACAGTAATTAATCCTGAAAATGGTTCCTTGATATTGAATGAGTCAGGAGAGCCAATCACTGGAAAGGTCGGTATTGCCCCTCTTGAAATCAATGTCTGGAATCCAGCCTTCGACATTACTCCACATGAGCTTATTGACGGAATTATCACAGAAGAAGGTGTATTTACCAAAAATTCCAGTGGTGAATTTCAACTGG	768819	-	ATGAGTCAG		CT		RR-YY		2.72204	0.930393	YPR118W	YPR118W	G-SELEX
Peak_542	16	818579	818822	GAAAGAAAAAATCGAAAAACAGCAAACATGATGATGGTTCTACTGGATTTTCTGCTGCAGTAAATGCTATTTTATCATCACATCTGAAAGCATACGACAGGAAGGACCCCATCATGGCTAGAAACAAAAAGGTGCTGAAGCAAAGTGAGTCAGAAAAGCTAGAATACAAGGCCAAAAAAGCATTGTTGGCAGAAAAAAAAAAGTTATTAGGTAAAGCCAGAAAGACGGATATTATTCCAATTGC	818727	-	GTGAGTCAG		CC		RR-YY		2.9215	0.618699	YPR143W	RRP15
Peak_543	16	822216	822596	ACCTTCGGGCATCAACTACCGTTTCTTATCGCTGGCACTATCTATCCACCAATCACACGGCAGCAGTACTGCTGCCGTGGACGGCAAATTAGGTACAGGGCCTATGACTGTTATCATTTGGCAGGCTCAGACAGAGAGAGAGAGCACAAGGAAAAGAGCCTTAACTCATGTAACATTTGACTCATTCTGTAAACTGAAAATTTGCTGCCCACTCGAGATGACAAATAGTTCGTTCTTGAATTTATGCGCATTTATAGATACGCATATATAACCCTATAGTGAACGCCACTAGGAGACAGATTCTGTTTGGACCCTGATCGCATACTCTTCTTACCTTTACATAATAAAATAAGAAAAAGTATAACTTGCTTTACGCTAAGG	822396	-	TTGACTCAT		TT		RR-YY		4.65798	6.85254	YPR145W	ASN1	G-SELEX
Peak_544	16	877610	877922	TTATTCAAATGATAGGTCTTCATTTTATGAGTTGCTATGGGTTGATACCTTTGCTGGCCTTAGTTTTGATCTTAAAGCATTGAAAAGGTTACAAACAGTACAGTATACTTTTTTTATATCAATATAATACTATCTCTATGAGCTTTTACTTTGTCGAGATTTGCTGAGTCATGTTGTGGCTTTTCTTTTACTAGCCACGTGAAATGATGATAAAAATAAAAAGAATAACGACGGAATAAAGAACAGTATGATAAACCGTAAAGATATTTAGAATCAATAGGTGATGTCCACCCGGTAACAAGATGCCATTCAT	877777	-	CTGAGTCAT		AG		RR-YY		3.954	1.74704	YPR167C	MET16	G-SELEX
Peak_545	16	897209	897598	ACAAAAAAGACGGAGAATATATTATATAAAATCCTCTACTCTTTTCGTTCAGGTCCAAAGGAAAATTCTTGCACGCGCAATGGACTGAACAGGCCTTATATTATACAAAAAGCCTAATAACGATCAAATAAAACAAAAGAAAGCCGTTGCTCCTATGCCTGACCAGAGACGGCTACTTGTTGTAAGTGAGTCATGAAATTTTGTAAGGAAACATCATCTGTTAAGACAATTGTAGATCCTCCGCGCGCCATGTCTTGATAGTTATCGGAAGGATTCAATTTAGATAACAAGAATCTGGCTTGAGAACCACCGGCTTCAGTATCAATGAATCTTGGTAGCGGGAACCTATCTACTAACAATTCTGCGGCTTCTAATTTTGGCTCTTCAAGA	897398	-	GTGAGTCAT		AC		RY		5.97207	1.09564	YPR180W	AOS1	G-SELEX
Peak_546	16	907002	907418	TGTTTTGTTTAATTCGCTAAGATCTAAGTTTTTAACTAAGTGAGCAGCGGCAGTTACAGAAAGAGGCGAGAAGTAGAAACAAGGGTGTATAGATTTTCGTTACCTCACATAGATATAGAACGAATTCATAGGTACCAAATACATTCCACTTACACCTTCCAGGCTCAAGTCTTGAAAAGAAAGCAGAACATACAGCCCGGTTGAATAGCATGAGTCATGGTTGCCGAAGAGGACATCGAGAAGCAAGTCCTTCAATTGATAGACAGCTTTTTTCTGAAGACTACACTACTAATATGCTCCACCGAATCAAGTCGATACCAGTCTTCTACAGAAAATATATTCCTATTTGACGACACATGGTTTGAAGATCACTCAGAATTAGTGAGTGAGCTACCCGAG…	907215	-	ATGAGTCAT		AT		RY		8.85838	1.44123	YPR185W	ATG13	G-SELEX

## Sheet: Table S3
2021-10-09
Table S3: List of G-SELEX peaks: Gcn4 binding sites in vitro
													Weighted average of	G-SELEX Replicates (raw coverage)
				Watson strand	Central base	Central base	TGACTCA strand	TGACTCA strand	TGACTCA strand	TGACTCA strand			3 replicates				Rawal
Peak No.	Chromosome No.	Peak Start Coord.	Peak End Coord.	Peak Sequence	Motif Coord.	Second Motif Coord.	Motif sequence	Second Motif Sequence	Motif Flanking Bases	Second Motif Flanking Bases	Motif RY Type	Second Motif RY Type	Peak Norm. Occupancy	Peak Occupancy Rep.1	Peak Occupancy Rep.2	Peak Occupancy Rep.3	ChIP peak
1	1	12941	13113	TGGTTGGAATGACGGATGATTTAAATGATTCAGAGAATATAGAAGTGGAGGTTGTTGTAGAAGAAATGACAGGGGAAGAAATGAATGAAGAAGAAATGACTGGAGAAGAAGTGACTAGAGAAGAAGTGACTGAGGAAGAAATGACTAGAGAAGAAGTGTCTGAGGAAGAAATT	-	-							3.40331	328	89	235
2	1	13609	13736	TGTAATTGGAGGTTGCTCTTGTGCACAGCATCCGAATGCAACGTCGCCACCGACTGATAGAATTGCAGAGTCATCGACCTTAGCAAACCTGAACGTGTAAGAACTTGTTTGTGGTGGTAAAAAGTAAC	-	-							3.14192	208	123	270
3	1	18232	18376	TGATGATTAAGCTTTGGCCGCTAAGTCTCTCAATTAGTGTTGATTTTGGTTTTATTCATATGATTCTTCTTTAGTGAAGTATTGATCAATTACGTGAGTCAGCTTTTTGAAAACCCCATTTGGAAGGAATTAGGAAATTATTTTG	18329	-	GTGAGTCAG		CC		RR-YY		4.6789	320	136	440	ChIP
4	1	19371	19611	CTCCACATAATACGTGGGTCAGACATAAAGGTAGAATACTTGATACAGAAGAGATTATTCGGTACTCTTGATGGCGTGCTTGAACTGGTGCCTCTTAACAACCGGTAATATAGTCAGATGAGTCACTACGAGTGTGTGTAGTAGCAAGTGTTTTACCTACGTGGCAGTAAGAGTAGCTCTATGGTTGTGTAATAGTGGTGCTTATTCCTAATGCTCTGAAGTCTGAAGCGGTACAGTTGGT	19492	-	ATGAGTCAC		GT		RY		235.519	25480	3586	15985	ChIP
5	1	22119	22336	CTTGTAGGACCACGATATATAAGAAGCCTAGTTCCGTTGTAGCATCACATAGAAGAGAGCGACAATGCCTCAGAAATTCTACAGCAACAGAAAGCACAGTGAGTCATTAACTGTTGGAATAAGACTCAACTGCGAGCTATCGACTAGTACTTATATTACTAGTATATTATATACGGTGTGAAAAGACGACATGAAGATTGAGGAAATGGTCCCAAGAT	22221	-	GTGAGTCAT		AC		RY		516.823	62895	5167	30798	ChIP
6	1	24977	25296	CACTGGTAACAGGTGGTAATGATGAAGACGAATATGTAGACTTTGGTGATTCAGAAGAGATAGAAGAGGAAGAAGAGGCAGAACTAGCTGAACCCGTTTCGCTCTCAGAAGAACCAGAGGTGGAACTACTGGTTGGAATGACGGATGATTTAGATGATTCAGAGAGTATAGAAGCGGAGGTTGTTGTAGAAGAAATGACAGGGGAAGAAATGAATGAAGAAGAAATGACTGGAGAAGAAGTGACTAGAGAAGAAGTGACTGAGGAAGAAATGACTAGAGAAGAAGTGTCTGAGGAAGAAATTACTGAGGAGGAAATCACA	-	-							5.34284	545	117	360
7	1	30605	30755	CATTGTTACTACTAAACACTTACTGTTAAATTAAAAAGCTGATGTTGCGTAATCCATTGACCAATTCATAGGCAATGTATTTCAATGACGCACAAGATTCATAACAAATTTTTTATTTACGATGTACCTGTACATTGTGCAGAAGGTCTTC	-	-							3.62288	226	110	358
8	1	33534	33727	TGTGATTGATATCGAATGGTGTGGTATTTGCGGTACGGACCTGCATGAGTACACAGATGGTCCTATCTTTTTCCCAGAAGATGGACACACACATGAGATTAGTCATAACCCATTGCCACAGGCGATGGGCCACGAAATGGCTGGTACCGTTTTGGAGGTGGGCCCTGGTGTGAAAAACTTGAAAGTGGGAGACA	-	-							31.3408	2773	670	2553
9	1	36008	36157	GGACAGCCACCAACATTGCAGTTTGGGGTCCAAAACCTGTCCCATTCCAACCAATGGATGTGACTCTCCAAGAGAAAGTTATGACTGGTTCGATCGGCTATGTTGTCGAAGACTTCGAAGAAGTTGTTCGTGCCATCCACAACGGAGACA	-	-							5.83948	390	168	559
10	1	54940	55126	GAGTGACTGAGTGTTACATTAAATATATTTATATATAAACGTATGATATTTAGGGATTGTTGATTGATAGGTTGAAAAGTTTCGATCTCAATGACTCATTTTCCTGTTCTAAAGCCTTGATTCGAGCTTCTGAAGCGTTAGCATCGAGCTTCCGTCTTTCTCTTTCGGATATCCATCTTCTTTGTAA	55034	-	ATGACTCAT		AT		RY		16.7552	1383	312	1511	ChIP
11	1	56727	56853	GTCATGGAGTCCCTGAGTGATGGTATGGACATCCCAGAATCCATCGAGTTTGTGAACTCGCTGTCGTCATCATCACCAGTGTTGTCATTATTGCGAAGATGCCTGCCACTAGGAATCCATCGACGTA	-	-							2.27933	148	96	195
12	1	64804	64998	AAGAGATAATTGGTCATCGTGTTTACAACAGTTGATTCATGATCTGAAAAATGAGCAGTTTAAGGCAAGACATCACTCTTCAACATCGACGACTTCATCGACAGCCAAATCATCTTCAATGATGTCACCCACCACAACTATGAATACACCGAATCATCACAACAGCCGCCAGACACACGATAGTATGGCTTCTTT	-	-							2.37343	191	80	188
13	1	69997	70153	CTGATGTTTTAGGCACTTAGTATTAGATATTCCTAAGCCTCCCTCACCATAAATTACCTTTATTACTTGCATGACTATTATTAGCAGAGCATGTAGTATGGGACTCAAGACCGATATGATACACACCAAAGACGTAGGCACCGGCGATTAAATCAAA	-	-							2.49367	162	104	211
14	1	72071	72220	ACCAACGATGTTGACTACCCAATCCCACCAAACCACGAAATGATCTTCACCACCGATGACAAGTACGCTAAGGCTTGTGACGACAAGATCATGTACGTTGACTACAAGAACATCACCAAGGTCATCTCCGCTGGTAGAATCATCTACGTT	-	-							7.99857	660	241	631
15	1	75027	75167	ATTTTTTGTTCGAGAATCACTTTTTCAAGATGGTAACAACATCTTCGTCTTCCAAAATGTGACTCAACCCCACGTATTGAGGTTGATGTTTGACACTGCTACCGTAAACCAGAGCATTTCTAAAGTCGTCCACTAAAGATT	75089	-	GTGACTCAA		GA		RR-YY		7.09939	511	193	654	ChIP
16	1	80196	80409	GATTCAAACAAAAGCTAAACGAGTTACTGAAATGCAAAGACGATGTACAATTGCAGAAAATTTTGGAGTCGTTAAAACCTATAGATGACACAATGACTCTACTGACTGATTCATTACGTAAACTATATGTTGATAGTGAAAGTACCAGTTCAACAGAGGAGGTAGAGGCACTACTGCAGAGATTGAAGACCAACGGGAAGCAAAATAATAAGGA	-	-							140.581	17696	1199	7997
17	1	89270	89496	GTAACGTCTTCAGCTTGGAAATCTTATCATTATAACCATTTACTATCGTTTCGTACTCTTGCCTTTGCTTAGATGGAATATTTGACAAATCTCCCTGCAACAACTGTGTTAATCTTGTATATGAGTCATTTAACATCTCTAGATTCAAAATGAAAGAGTTCTTAAATTCGATAGCTTCCTCCAGTAATCCAATCCCGTAACTAGCCCTAATATTCCGTTCTTCAACT	89394	-	ATGAGTCAT		AT		RY		90.0022	10144	1203	5869	ChIP
18	1	99080	99564	GGTGGTAGATATATGGTTGTCACTATAACCGAAGGAGGAATTAGCGAGAGAATCGTTGATGTGGATGACTCTTGGTTCACCATTGCCCTCTGCGTCGCCAACGTTCTTTCTTAAAATGTACCGGTTGAAAAGAATTTTAATGTTGAACTTATTCCTCGAGTCTAGATAATTATCGTCTAATTCGTTATTAGTCACCGCATTGTAATGATTCATTTCGAAACTTTCGGGCCCTTTCTTCCGTTTGAACGTAAAGGCATTTTTGAGACCATTACCAAACCTAGCAAATAAACCGGGAGGCTTGACTGCTCGTAGGGATTGTGGTTGATATGCATCTGAGTCGAATCTATTGGCATTCCAAGACGTTTGGTCGTCATGGTTATTGCTCATAAATAGATTTTC…	-	-							138.485	16553	1695	8242
19	1	100380	100570	CACTGTCGCTTTCGCTTTCACTGGCGCTGGAAGCTTCTCTGTCAGAGTCAGCTAACCACTTTTCTAAGTCATCCACGTCAACGTATTCACCTTCGCCATCATCTGCAACGTATTCAACTTCCCCATCATCACTTTCCTCTTCTTCATCCCAGTCTTCTTCCTCGTCCTGAGAATTCTCCTCTTCCATTTGA	-	-							2.36298	227	73	158
20	1	102775	102909	GTAAAAGCCGACTCAGAGTTTGCTCTCCGTGTGTTCCGGGCACTAGATGTGTCATTAATGTCGATATCGTCCATTGTCAATACACTTCCTGATATGTTACTATTAGTTTCACTCTCGTTCTTCAGAAATTTACTT	-	-							4.3966	331	101	411
21	1	109169	109335	GCGGCCACCCGCAACAATGAGTAGATGAAGGTTTTGCGTGGCGTAAATTTCTGGTCACGGAACATGGGCCAGTCGGCAATGACTCTTCCGTAAAGGTCGCCTAGGTTCCACAGCGTGAATATGAGAGGTATGTACTGTGCGTTGCTTAAAGGAAGCCCTGTCACGTA	-	-							4.64754	368	127	394
22	1	115483	115760	ACTAACTTGAATATAGACTCGGAGGCACTGAGCAAGTTGCCCGTGAACTACAACAAAAAGAGAAGGCTGGTAAGGGCAGATCAGCATCCAATTGGCAAGTCTTATGAGTCATCCGCTACACAATTAGGTTCTGCAAGAGAGAAACTACTGGCGAACCGCAAATACGGTCGTCATGCAAACGACAACGATGAAGAGGAGGAAGAGAGTATGATGACGGACGATGACGATGCAAGTGGCGACGACTACACAGAATCCACGCCGCAGATAAATCTGGATGA	115590	-	ATGAGTCAT		AT		RY		398.773	54788	3795	17696	ChIP
23	1	116327	116577	TTAGAAACACAACTAAGCCAAAAGTGGTCGAAGATGAAGATGACGATGTAGATTTGGAGGCAATCGATGACGAATTGCCGCAGTCTGAGCATGAAGATGATGACTATGAAGAGGAGGACGAAGACTATAACGATGAGGAAGAAGATGTGGAATATGATGATGGTGACGATGATGACGATGATGACGATGAATTTGTCGCTACCAGAAAAAACACACACGTGATCTCCACCACGAGCAGAAATGGCCGTAAA	-	-							41.5403	4969	651	2326
24	1	119655	119813	TATATCTATATATATATGTATATGTATAATACTTATTACTATGATATTATTCCATGTGTCACAAAACCAGAAAGATCCCGTCGTATTATTGAGTCACGTGCTTTATTCCATGGCGGGTAATAAATATTAAAACAAGGGTTTTTTAAGTAAATGATTACA	119747	-	TTGAGTCAC		GA		RR-YY		6.70207	458	164	660
25	1	123342	123470	GAAAAGCTAATTGACGAAAACGCTACAGAAAACGGATTAGCGGGATCACCTAAAGACGAAGACGGAATCATAATGACTAACAAGCGAGGAAACCAACCTGTTAGTACTTTCCTACGCACCCCCGAAAAG	-	-							2.25319	149	107	175
26	1	128558	128756	AACCATGGGTTGTGGTGGCTGTGGCTGTGACTGTGACTGTAACTGCGATTGCAATGGTTCATCCTTGTATGGAGTATGCGTCGAAGGCAGCGGCGACTCCTCGTCTTGTTCATCGTCATCCTTATACATGACCGTAAGCTCGTCATCATTCTTGAACCGCACTTTTTTCAAAGACTCTTTGGACACCTCATCAGTATTT	-	-							7.76855	662	222	606
27	1	129193	129364	TAAACTCATAACAGTGCAACGGCAAAGTACAAGGGAAGGAAGCACAGAAGCAAGAGGAGGCGCATCGATCGTGGCAGATGAGTCAGCAAACACCACAGGAAAGTGAACAGACCACAGCGAAAGAACAGGACCTTGATCAAGAGAGCGTGTTGAGCAACATTGACTTCAATAC	129274	-	ATGAGTCAG		CT		RR-YY		15.2809	1374	411	1140	ChIP
28	1	132245	132424	AGAAGCCTGCTTCCAGAACTAGAACGAGATCAAGAAGGGGCAAGCGTGGTCGTGACGATGATGATGATGACGACGATGAGGAAAGCGATGATGCATACGATGAAGTAGGTAATGACTATGACGAGTATGCTTCAAGAGCGAAGCTGGCCACCAATAGGCCCTTCGAAATAGTCGCGGGAC	-	-							66.0327	7609	1027	3996
29	1	135229	135378	ATTCTACCATAATAAAGGGATTTTTTAACAAATTTCGAGTCATGTAGTAATTTCTTGTCATTGTCGACTGTGGTGTTGTCACTACTCAACGTATTCGCACTACTAACACTGAAATTGAGGTTTGGTTGCAATTGTCTGTATGTTTCGGTG	-	-							9.62443	923	189	731
30	1	150765	150940	TGACTCCTTTTTTGTGTATCCCGTTAATAATGTCCATAGGCTGTCCTCAGTAATCCCAACCGAGTATGAATGATTAGCGTCGCCTATAATATCAGTCACATTTTTAGTTGTTATAGCACCATCACAATACACCTCAATGTCCTTTTTCAATATCACGCATGAAAGCACGAACTGTT	-	-							9.64534	775	192	878
31	1	156554	156707	CCATGCCATTAATTAGAATTTGTTAGCATTTTTATTCATTTGTGCATTATGGGTTCAAATTCATATGACTGAACGTGTAGTTTCATATCCAGTCATCAAGAGATGCTGAACCGCCCTTCAAAAACTTGACGAAATAGAAGTTTTTTTTTTACAT	-	-							11.3757	792	258	1129
32	1	160387	160570	TTATTCCTCATTCCGTTTTATATGTTTATATTCATTGATCCTATTACATTATCAATCCTTGCGTTTCAGCTTCCACTAATTTAGATGACTATTTCTCATCATTTGCGTCATCTTCTAACACCGTATATGATAATATACTAGTAATGTAAATACTAGTTAGTAGATGATAGTTGATTTCTATTCC	-	-							12.4475	1052	259	1077
33	1	164799	164930	ACTGTTTCTCGATCCCTGTTGTTCTTCATAAATAGCATGGATATCTAAGAACAGTTCAGCGACTGTCATATTTAGATGTCGATGACGTGTGTAGCGTAAAAATTTATATTCGCCAGATAGACCTCTCATAAT	-	-							3.13669	188	118	296
34	1	165328	165494	TCATTAGGTGAGGTTAACATTGGTGGTGGTCTGACATATTTTTTAGTGGATGTCATATCAGAGTCCGCTGAGGATGAATCAGTAAATGTATTACCTGACTCAGGTGATGGAGTGCTCAGAGGCGTTCCAACTGATGATGGATACTGCGGAAACTGTGATTGTGGCCC	165426	-	CTGACTCAG		CG		YR		8.57886	657	189	798
35	1	165981	166149	CTCATTCCGTTTTATATGTTTATATTCATTGATCCTATTACATTATCAATCCTTGCGTTTCAGCTTCCACTAATTTAGATGACTATTTCTCATCATTTGCGTCATCTTCTAACACCGTATATGATAATATACTAGTAATGTAAATACTAGTTAGTAGATGATAGTTGAT	-	-							12.3063	1002	298	1054
36	1	166388	166557	CATCAGTAATGTTCGTGGAAAGTACCTATCCATACTGTTGTATCACGACTAAGTAGTTGTCGACTACTACCTCCTCAACCCCAGTTATATCCCTATGACACATTGGAGGATGCTGAATAATGACAGAATTTTATTCCTCCTTTTCATTATCATAATCTGAAGCAAAGTTA	-	-							8.38543	611	233	761
37	1	168786	168941	CCATTGTCATGTCTAGCAGCTATAGAACTAACCTCCTTGACACCACTTGCGGAAGTCTCATCAACATGCTCTTCCTTATTACTCATTCTCTTACCAAGCAGAGAATGTTATCTAAAAACTACGTGTATTTCACCTCTTTCTCGACTTGAACACGTC	-	-							3.18897	219	103	290
38	1	170260	170402	TATGAAACATTGACAGGGTCTAAATGGTCTCACTAACGTGATTTACATATACTACAAGTCGCCAGTGTAACTCCTCACTGAATATGATTCATACATACCCGTATGTATTAATGTATAAATGTTCTCAGAGCAAATTTTATCGA	-	-							4.08816	257	115	410
39	1	174657	174806	ACAGTGTTATCAGCACTCAGCAGGATGTTAGCCGCCTTGATGTCCCTGTGGATGACTCCTTCACCGTGTAAATATTTCAGCCCCAATAGTGTCTGTGTCACATAGGTTTTCGATTCATTTTCACTTAATCCGGTAGAGCTCCTTGAAATG	-	-							9.18006	752	195	810
40	1	189421	189599	GTAACTGTTGGAATAAAAATCAACTATCATCTACTAACTAGTGTTTACGTTACTAGTATATTATCATATACGGTGTTAGAAGATGACGCAAATGATGAGAAATAGTCATCGTTTTCAACGGAAGCTGAAATACAAGGATTGATAATGTAATAGGATCAATGAATATCAACATATAAAAC	-	-							18.449	1502	392	1635
41	1	189801	190078	TGGCATCGTTACTTTCTAAACGTAGGACGTGCGGAATGACAAAACCATCAGCAGTGTCACGATCTCTCCAGTCACAATGGCAATCATGAGTGCATAGTCCAAAGTAAAGGGGCAAGGAAAAGCATGATTGAAAGGACTCCCCATCTGGACTCTATATGTCATCAGCGGCTAAAAAAAAGCATATAGCACAACATCAGCATCAGCATCAGCACTAGAGTCATCGGCCCGGCGGTCCGCGGTCATCCCCGCGGACTTTCCGTCCGCCCGGCGGGCTGTAT	-	-							2.67142	201	101	245
42	1	193868	194043	CAAAACGGTTGACCAAGAGCCCGCATCTGTCCAAATCCACACTGACACAAAACGATCACGATAATGACGATGACAGCACTAACAACAACAACAACAAAAGTAATAATGATTATGACGATAATAATAATAATAATAATAATGACGATGATGATTATGATGATGATGATGAAAGTAGA	-	-							7.37646	590	185	642
43	1	197239	197414	AGATCAACTTTTTGATTTTTCAAAAATGAAAGAAACTGTTGTCTCCATTTATGGCCTCATATCTGAAGGAAATTCGTCTGCTATTAGTCATACCACTATCTTCTTCTTGAAGCTGCATTTCAAGGTTGATTAGGAAGCATCTAACAATCATTCGATAGGGAAAACAGAAAGGCCGT	-	-							19.8762	1487	434	1881	ChIP
44	1	209697	209853	CATGTCGTGTTTTCACACCGTATATAATATACTGGTAATATAAGTACTAGTCGATAGATCGCAGTTGAGTCTTATCCCAACAGTTAATGATTCACTGTGCTTTCTGTTGCTGTAGAATTTCTGAGGCATTGTCGCTCTCTTCTATGTGATGCTACAA	-	-							27.6186	3298	249	1737
45	1	212493	212738	ATAGACCAGGCCAACTGTACCGCTTCAGGCTTCAAAGCATTAGGAATAAGCACCACTATTACACAACCATAGAGCTACTCTTACTGTCACGTAGGTAAAACACTTGCTACTACACACACTCGTAGTGACTCATCTGACTATATTGCCGGTTGTTAAGAGGCACCAGTTAAGCACGCCATCAAGGGTACCGAATAATCTCTTCTGTATCAAGTATTCTACCTTTATGTCTGACCCACGTATTATGTG	212621	-	GTGACTCAT		GT		RY		115.493	13646	1503	6944	ChIP
46	1	213731	213869	AATTTCCTAATTCCTTCCAAATGGGGTTTTCAAAAAGCTGACTCACGTAATTGATCAATACTTCACTAAAGAAGAATCATATGAATAAAACTAAAATCAACACTAACTGAGAGACTTAGCGGCCAAAGCTTAATCATCA	213772	-	CTGACTCAC		CC		RR-YY		3.05828	206	71	308	ChIP
47	1	221076	221238	GCTGCTGTCGCTTTGGCCCTACTCTCTCGCGGCGCTCTCGGTGACTCTTACACCAATAGCACCTCCTCCGCAGACTTGAGTTCTATCACTTCCGTCTCGTCAGCTAGTGCAAGTGCCACCGCTTCCGACTCACTTTCTTCCAGTGACGGTACCGTTTATTTGC	-	-							4.2084	364	116	327	ChIP
48	1	222482	222824	TGTCCCATGCTCATCTACCACTGCCACCATCACATCTTGTGACGAAAACGGATGCCATGTTCCAGCACCAACTGCTACCGACGCAACTGCAACCGTTTCCTCCAAGTCATACACCACTGTTACTGTTACTCACTGTGACAACAATGGCTGTAACACCAAGACTGTCACTTCTGAATGTTCTAAAGAAACTGCAGCAACCACCATTTCTCCAAAATCATACACTACTGTTACCGTTACTCACTGTGACGACAACGGCTGTAACACCAAGACTGTCACTTCCGAGGCTTCCAAACAAACATCATTGGCCACTAGCACAGTCACCAAGTCTGCTGCTCCAACTTCT	-	-							7.29804	589	210	601
49	2	5855	6348	CACTACCCTAACCCTACCCTATTTCAACCCTTCCAACCTGTCTCTCAACTTACCCTCACATTACCCTACCTCTCCACTTGTTACCCTGTCCCATTCAACCATACCACTCCCAACCACCATCCATCCCTCTACTTACTACCACCAATCAACCGTCCACCATAACCGTTACCCTCCAATTAGCCATATTCAACTTCACTACCACTTACCCTGCCATTACTCTACCATCCACCATCTGCTACTCACCATACTGTTGTTCTACCCTCCATATTGAAACGTTAACAAATGATCGTAAATAATACACATATACTTACCCTACCACTTTATACCACCACACATCACATGCCATACTCACCTTCACTTGTATACTGATATGCCATACGCACACGGATGCTACAGTAT…	-	-							2.11727	287	81	73
50	2	7194	7365	ACTTGTAACTCCACTACCCTGATCTGCAATCTTGTTCTTAGAAGTGACGCATACTCTATATGGCCCGACGCGACGCGCCAAAAAATGAAAAAAGAAGCAGCGACTCATTTTTATGGAAGGACAAAGTGCTGCGAAGTCATACGCTTCCAATTTCATTATTGTTTATTGGACA	-	-							2.28456	211	57	183
51	2	9098	9266	GAATAAAAATCAACTATCATCTACTAACTAGTATTTACGTTACTAGTATATTATCATATACGGTGTTAGAAGATGACGCAAATGATGAGAAATAGTCATCTAAATTAGTGGAAGCTGAAACGCAAGGATTGATAATGTAATAGGATCAATGAATATTAACATATAAAAC	-	-							12.024	984	273	1053
52	2	10847	10983	CTAAAAACCTACAGCGCTCTTCATCATATCCCTTCCCGTTTCTTCCATTGCGTCATTCATGGTTTGTCCCATTGTGGTTGCATAGTCATTAATAGTGGTTTCTACCGTGTCTAAACGAGTTTCAATTGCCCTAGAAA	-	-							4.49593	371	131	360
53	2	22885	23111	ATACGGATGCTGGGCCCAAGCTTTGTGGATTATAAGAAAATGATGATGAATATGTGTTTGGTGTCATCATATCAGAATTGATGCTAGAAGATAAAGAGGAGCTCAAATCATCAGTTAAGTTATACATTGTGTCATCGGTGCCATGCTGAAATAAAAAGTCATGTGGTAACTCAGCTTTTAAGCCTTCTTGTTGCTGTAATGGAGTATTCATTGCTCTATCCACAGGT	-	-							3.77972	318	96	309
54	2	24042	24238	TCTGCAGTTGCGTTTTTTTTTTTTGCTGGTAAAAAAAAAGAACAAGTGTGGAGAATATGAGCGAGGAACCACCTTCTGACCAGGTCAATAGTCTCCGTGACTCATTGAATCGATGGAATCAAACAAGACAGCAGAACTCGCAGGGTTTTAATGAATCTGCGAAGACATTGTTCTCAAGCTGGGCGGATTCTCTCAAT	24142	-	GTGACTCAT		GT		RY		43.8249	3814	871	3698	ChIP
55	2	26314	26496	GGCGAAATCTAAATAATACGGATTATAAGGGTCTTTAGCAACGGGATCTGTTTGATCATACTCATATTCATAACCTTTACTAACAAATGTGACTCTTTCAGTAATACTGACATGAATACGTTTAACACAAACGTTTTTGCATATCGGTGCCAATTTTATCTTGATTGGGACTTCACTGTTTAG	-	-							14.7738	1186	323	1319
56	2	29071	29204	AAAGTTGACCAATTTTTGTTATATATGTCCGTAAAAGTTATGACTTGGCACTGGTCTTGGTTTACTCATCAATCAGCTAGGATCAGCGCTGAGTGACTGCTTGCGGCTGGGCGGCTAAGAAATGGGAATATGTA	-	-							3.04259	179	87	316
57	2	29511	29818	ATAAGAAGCAACATCATCTACTGACTAGTATTCGTGATACTAGTATTCAATCACGTAAGGTGGAAGAGAATGACATGAAGATTGAGAAACAGTGATCAAACTCAATAAAGAGCTGAATACAAGCACATATAATTGTTGGAATAAAAATCAACTATCATCTACTAACTAGTATTTACGTTACTAGTATATTATCATATACGGTGTTAGAAGATGACACAAATGATGAGAAATAGTCATCTAAATTAGTGGAAGCTGAAACGCAAGGATTGATAATGTAATAGGATCAATGAATATTAACATATAAAATG	-	-							10.6909	861	237	950
58	2	30205	30374	ATGACTCCAAACAAAGCTATGGCTTCTAACTGGGCACATTACCAACAACCATCTATGATGACGTGTTCACATTATCAAACGTCACCTGCGTATTATCAACCGGACCCACACTATCCGCTGCCACAGTATATCCCACCGCTGAGTACTTCCTCACCTGATCCAATCGATTC	-	-							11.3235	952	272	944
59	2	31139	31281	CTAGTAAATTCTCAAGGGTGAACAATGATCACATTAATGAATCAACCGTTTCATCACAATACTTAAGCGATGACAACGAACTTAGTCTTAGGCCAGCAACAGAAAGAATCTAAGCCAACACACACAATAGACTCGAATGACGA	-	-							2.54072	171	76	240
60	2	33134	33280	AATAGTGATACAAATATCAAATACAGGACTACAAATAGTACGCCCTCAATAGATGACCGTTCGCCCGACAGTGACTCTACTACTCCCATCATCTCCATAGAAACAAAGGCTGCATGCGATAATACACCCTCCATTGATACGGATCCG	-	-							3.06351	199	128	261
61	2	33874	34085	CAAAGCCAGATTTGTTGCAAGAGGCGACATTCAACACCCCGATACATATGATTCTGATATGCAATCCAATACCGTACATCACTATGCACTGATGACGTCATTGTCAATCGCATTAGACAATGACTATTATATCACACAGCTGGACATATCCTCTGCTTACTTATATGCTGATATCAAAGAAGAATTATACATAAGACCTCCACCACATTTAG	-	-							71.7623	7426	1162	5140
62	2	35272	35444	GTTGGAATAAAAATCAACTATCATCTACTAACTAGTATTTACGTTACTAGTATATTATCATATACGGTGTTAGAAGATGACACAAATGATGAGAAATAGTCATCTAAATTAGTGGAAGCTGAAACGCAAGGATTGATAATGTAATAGGATCAATGAATATTAACATATAAAAT	-	-							10.6595	868	220	953
63	2	35880	36098	TTAATGAAGAAGTGAGTACTGATCTTCTTATACTAAATAAGAGAGGTATATAAAACACACGCCGATTGGTCATATTAATTATGACCAATATAATAGTGATTCCGGTAGTTACTATACATTGATGTGACGACTCATATTCCTCATATATGTACCTACCATAACATGTTCAACTAATAGGTCTTTAACACAGCTTCAGTATTGTCTGAGCTTCTCGTTTAA	-	-							30.5514	2861	405	2580
64	2	41434	41693	AGTTTATTGTTGAACACATTAAACATAGACAACACTGCAAGAGTCATTTTCGATGCATCAATTAAGGATACACAAAACGTAGGGCAAGGTAAACTTCAAAGGAAAGAAGAAGAATTAATTGAAAGAGATAGTTTAGTAGATGACGAAAATGAACCTAGCCAGTCATTGATAAGTACTCGTAATGACTCAACCGTAAATGATTCCGTTATTAGTGCACCTTCCATGGAAGATGAGATTTTATCTCTTGGTATGGATTTTAT	41619	-	ATGACTCAA		AA		RR-YY		27.3677	2547	474	2214
65	2	52371	52501	GGGATATGTTGGTGTCCTTATTGGATTGCTTTTCATATAGTAGTATGCTCATCACTGAATAAAGGGAGTCATACGGTAGTTTGTAAAGAAGTCGTTTCATGGTTAGTTGCAATGGCTTTTGAAATTCATTC	-	-							2.68187	169	80	264
66	2	61272	61460	TTATTGTCTTCGACAGAGTTATTATCCTTGTCGCTCCCTTTATCATTAGCCGTATTTTCGTTATCCTCGTCATTATGAGTCCTCAGTTTTGCACGTTGTGCTCGTGACATATGACTCCAATTCTGCTTTTTCTCCAAATACTCTCTTTTGCCCATTGTGCTGTAGCCGTCATCGCTTGGATTTGGAGGC	-	-							16.5931	1683	293	1198
67	2	63127	63251	GCTGGTATGCTGGTAGATCTAAACGAAGTCCAGTTTACATCAAGATGATATCGTGCAATATTTACTACGGCATGACTTAACAGTACAGTCATGATTTAGGAATTTGAGTGTTCTCCGGGGTTTTG	-	-							2.89621	183	78	296
68	2	71270	71415	ATGTGACGGCAAATGCATTTTACATGGAAGGCTATCTACAAAACAGCAATAAAGAGTCATGTAAGATTGGGAAATCTCTAATGTGACATTCCATACTTGTTGCAACAATTTTGGGATGCTTCTGCGTCGTACGACCCTGTATTTAC	-	-							3.58629	226	102	358
69	2	81591	81777	CATATTTTGCCTCATCGGAGGTGATAACAACATCACGAACATTTAATTCCTCGATAATGTAGTTTTTCAAGGCTTCTACATCCTTCAAGTATGATTCATCACTGTGAAGGATGACCAAAGTCTTCAATGGAGTTTTTAAGGAAATAGTTTTCTTTTCACGAATGTTTCTACCCAAATCGATAACGGA	-	-							11.8985	914	253	1109
70	2	84280	84447	AGCTTTTGGCTAAAGGTTGTAGGAAGTCGAGTAACATCACTCTAGTTTAAAGCGCAAAATGATATTTTTCATGCTTAAGAGTCATCATTGTTTCGAGATTTCTTGCGTGCTGCGGAAACAAAAAAAAAAAAAATTTTTCGTCATCATGGATAGATTACCCGCCATCGT	-	-							6.52433	436	167	645	ChIP
71	2	89911	90046	TTTTTTCAAAGACACATACATACCACGACTGTAAGCACATCATTTGTACAATACATTACCAGCTGAAATGTCAACATATGACGAAATCGAAATCGAAGATATGACGTTTGAGCCTGAAAATCAAATGTTCACCTAT	-	-							3.86336	304	123	314
72	2	91600	91768	AAACTATACTTAACTATAATGAGGGGAAGTTCGATGTTGTACTCGATTTTGTCGGTGGTTACGATATTTTGAGTCATTCTAGTTCATTGATTCACGGCGGTGGTGCGTACGTAACCACTGTAGGTGATTACGTTGCCAATTATAAAGAAGACATTTTCGATTCATGGGA	91672	-	TTGAGTCAT		AA		RR-YY		11.3026	961	254	947
73	2	113001	113280	CCTGTCCAGCATTTAGCCATCTTTGTGTCATAATTGGGTTGTATGAAGCACGCGCGGGGTTTGTAGCAATATGTCTAAAACATGACAATGCTGCGTGACAGCATTGTGCCGCTATTTTGCCCTTTGTCATGCCAAGATCTTGACGAATCACCAATGCCATCCTAACTTCTCCAGGTATATCATTCAATGAAGTGGACTCAATATCTTCGTCCTCATCGCTCTCATCTTCGCTTTCACTTTCCTCCTCATCAGTGTCATTGTGTAGCTTTCCTTCCTTCAT	-	-							3.75881	266	119	341
74	2	114567	114734	ATGTTTGTTGTTCACCCACAACTGAAGGCTCAGGAATTGGCTGTGATAATATGAGTATTTCCATTGTTGCTTTACTAAAGGAAAATGAATCTGAGTCACAATGGTTTGAGCGTATGAGATCAAAAAATTACAATATCCAAACGTCTTTTGTCCAAAGAAGGAAAAGTA	114661	-	CTGAGTCAC		GG		RR-YY		15.6051	1200	338	1447	ChIP
75	2	117463	117606	TTCAGGTAAACAAATCTGGCAAATCTCCACTGCTTGAGTCATTAAAACTACTCACTCAAGAAGGCATATACACGACAGTGGGTAGAGAAAAGAATATATCACTGTTCTTATTGAAGTTCCCTCGCGATGACGTTGCCGAAACTC	117500	-	TTGAGTCAT		AA		RR-YY		3.94701	283	105	368
76	2	119402	119616	GAGTTATTTTTCTTCTTTTTCTGACTCTCTCCTTCCTTATGTGGCTTTCTATATCGTTTTCATCCTGCTCTTGTCCTTTTCTCTTCCCATCCTCATCATCATCACTGTCTTCTTCATATGTGTCTTCCTCCTCATCATTTTCTTCTGATATTTGCTCATCCTCAATGTCATCATCAAGGGTAAAGTCTTCGTCTTCGTCTTCATCTTCTTTGGCG	-	-							3.87905	496	101	163
77	2	122823	122977	AAGCCATCATCTAGTCCAGAGTGACTCAAAGATTTATAGATCAAGTCGGCACTATTCAAATTGTGTGCGGACAACATGGACTCATCGTGATAAGACTGATATGAGAAATTAGAATGTACTGAGCCATTTGTGTGCTGTGGAAGCAGTTGGGACTG	122847	-	GTGACTCAA		GA		RR-YY		4.45411	446	98	309
78	2	133130	133371	ATGAGGATGATTGCGGGATAAACGATGATAATAGCGATAATAAAGGACAAAATTGTCAGAGCGATGTTACGAAGAATAATAGCGATGATGAAGATGACGATGACAACGACGACGATTATCGTGAAGATGGTGCAGATGAAGATGATGAGGATGATGATCACATGGGCAGCACAGATGACGATGAAGATGATGACGAAGATAGGCAGGCGGGCGAAAGTACCAAGGTGCAAAATTTTGACAAG	-	-							16.4676	1785	328	1049
79	2	136013	136194	GAGAGGCAAAAAAAAAGGTTGCCAAGTAAAGCGAAGTATTTGAAGTATACTGCAAGCATCACCGAAACAGGAAATCACGAAGCTGACTCATCTGTGATTTTCCGTCCCCACCATAGTGATGTAACATGCAGTAACGCACGGCGGGCCGAAAGTCGGACTTTACCCCAGATTTGTAGTTGTAT	136099	-	CTGACTCAT		CT		RR-YY		31.9211	2978	643	2485	ChIP
80	2	137061	137265	CTACTGACAGTGAAGACGATGATGATTATGAAGACTATGATTTTGAGTACGATTACTCTGGCGGTGATTATAACAAGAAAATTGACATGTACTTTAGTTTTCACACCGCACCTAATTATCAATATTTGACTCACACAAACTCTCATTCCGAGCAGACGGATGAACTTGCCGAATCAACGCCGCGCTACAATGCTCTTCCCGCCAC	137190	-	TTGACTCAC		TC		RR-YY		2.76029	202	97	229
81	2	154606	154768	TCCTGTTTATTGCCTTTGACATGTGATTGAAATAGACATCAAAATCCATCAAAGTGTTGCCATTAGAATCAACCATTAAAAGATGACTAATTTCATATACAGTCAAGGAATCCCTTGGGAAATTATCCATGATAAGCAAATGCATCTTCTCTGATTTTTTGTT	-	-							5.90221	442	125	562
82	2	159634	159814	ACCACTAACCTCGTATTTGCTGCTATCCTGTTTACTGTTGTCGTAGTTATCTATGGTCATCCTGTAGGTTTGTTGTAGTTTTATGTACGCCACTTTTTGTAATGACTCAATTATTGTCCACGCCAGCACAGCAACTTCTTTATATATACTATAGCGGCGCTGGCGCTCACCCCACAAGAGC	159739	-	ATGACTCAA		AA		RR-YY		11.679	954	269	1012	ChIP
83	2	186517	186674	TTCTGATTATCCTATAAAGCTGAACAGTAAAGCTTGTAAAATTACGCGATGACTTATGTATTGAAGTTATGACGTTCTCGATGATCTTCAGTCAAACAACCACTTTCCCGTAACATATGATATATCCCACCCGCTTCCTTGTACGCATTATTACGGTT	-	-							4.73118	323	134	448
84	2	188937	189133	CAAACTCACAATGAATTGCATTATCAAGCATTTCCGTAAACGTTTCGCCCCCATCATTGGTCAGGTATGCTACCGCATGACATTCCGGACTTAAGATTGACTCACAATTCTTACCACCATAATAGATAAATGTATCCTGTGCCTTAGCGTTAAAGTCTAATGGCATACCTAACTGCCTAGCCTCGGGCAATTTAGCA	189037	-	TTGACTCAC		TC		RR-YY		15.8089	1261	353	1411
85	2	197166	197339	CTTTGGCTTTACATGTAGTCGTTTATTATCCTATTGAATCAGCAATTATCACATCTCAGCTTTCATTACTTTTGATGACTGTTTCTCAACTCCATGTCATTCTTACACTGTGTATGATACTAATCGATAGATGATCGTTGATTATTCCTTCAACAGATTCTGTCTAAAAAATGG	-	-							13.8328	1094	321	1233
86	2	198203	198303	ACACGAATACAACTAAACAGATGATATTATAGACTTTCATTCCAACACATCTGTTGACTAGTAAGATGGATATTAGTCAATAGATGATGTTTCTTATTCCA	-	-							1.67813	115	73	135
87	2	221065	221214	TCAACTAATAGTTATATTATCAATATATTATCATATACGGTGTTAAGATGATGACATAAGTTATGAGAAGCTGTCATCGAAGTTAGAGGAAGCTGAAGTGCAAGGATTGATAATGTAATAGGATAATGAAACATATAAAACGGAATGAGG	-	-							9.72898	880	196	785
88	2	221710	221875	ATCACAGTTTACACAATATCCACAATATGTTGGAACACATTTGAACACCCCGTCACCTGAGTCAGGTAATTCATTTCCTGATTCATCCTCAGCAAAGTCTAATATGACATCCACTAATCAACATGTCAGACCACCGCCAATCTTAACCTCACCTAATGACTTTCTA	221770	-	CTGAGTCAG		CG		YR		6.15838	485	132	562
89	2	221909	222053	AATTCGAATCTCGGTGATATTATTCCGACAGCAACAAGAAAAGCCGTACGTCAGATGACTGATGACGAACTCACCTTCTTATGTCACACCTTTCAACTATTTGCTCCATCTCAATTCTTACCCCCCTGGGTTAAAGACATCTTAT	-	-							5.90744	458	134	538
90	2	225228	225374	GCTAGATTTGTTGCAAGAGGTGATATTCAGCATCCTGACACTTACGACTCAGGCATGCAATCCAATACCGTACATCACTATGCATTAATGACATCCCTGTCACTTGCATTAGACAATAACTACCATATTACACAATTAGACATATCT	-	-							2.7237	197	103	228
91	2	226644	226801	GTCTATCAACTAATAGTTATATTATCAATATATTATCATATACGGTGTTAAGATGATGACATAAGTTATGAGAAGCTGTCATCGAAGTTAGAGGAAGCTGAAGTGCAAGGATTGATAATGTAATAGGATAATGAAACATATAAAACGGAATGAGGAAT	-	-							9.54078	886	207	732
92	2	231096	231233	CGGACTCAATTATTAGAAATCCAGTAAATGATGATCACTACGTAGATTTGGTGACTCTCATCTGCACATCATGTCTGAAAATACTTCCTTCGCTATATGTCAAACTTTCTGACTCAAACTCGATTTCCACATTTTTGA	231208	-	CTGACTCAA		CA		YR		2.72892	182	99	241
93	2	232984	233147	AAGAAATCAAAACAAACTGAGTGAATTATTGAGACGATATTTGTTGGGTTTAAATCATAATAGTGACTCTGAGTCAGAAAGTATCCTCAAGTTCTGCCATCAGCTTTTCCAGGAATCAGAAATGAGTAATTCCCCTCAAATACCAAAGAAAAAAGTGAAAGACC	233056	-	CTGAGTCAG		CG		YR		7.80514	593	167	733
94	2	238406	238591	ACGATATACAGATCCTATATTCTTCATGTATGTAATAGATTCCCATACCTTCTTCGCATTTAAGACACTAATAGAAATGAAAGCTTTCTATTAGTCATTCTTCCTATGCACTAGACCACGCAAAGGTGAACCGGCTTGGTACGAGAATTCTATCACACGGTAATGATAGTGTTCCCGATGTCAAGC	-	-							5.97018	425	159	560
95	2	249279	249463	TTTTGTTTCCGCACGCGCAGGCTTTTTTCAGTCGTTGTGCAGATTCTTCAAGTTTGCCTTGATGACGCATAGTAATTGCCTGTCCGATGTGTGAAGATTCATCATTATCATAAGGTTCTGGGTGAAATTTAAGCTTCCCGCACTTGCTTGTTGCGTTCGATCCTTCTTTTTTATGACTGAAGGAA	-	-							19.6828	1649	425	1692
96	2	254265	254477	AAGACGGCATAAGGATGTAGATATTTTAGCCTCGTAAAGAGCTGTTTAAATGCAATTCTCGTCTTCTTTCCTGTTCCCCTTTTACCTGACTAATTATCCCGCCCATTAGTCAGATGATTGATACCAATTTTACTCAAATGTGTACTATCATGTCCCTTTTCGCACTGTTATTGCTCCTTACCTAAGCAAATATCCTTTTTTTTTTCTTTGCAT	-	-							178.53	24239	1404	8508
97	2	256971	257105	ATGGCTTTCCATGTGGTTAAAGAAAAATTGCAGCAGGAAGATATTCATTCATGAGTCAGTTATATAATCGATATATAGCTACATATTAAACAACTTGAAGCCGCATACGTGGTAGGTGTCTCATTTTCAATTCAA	257025	-	ATGAGTCAG		CT		RR-YY		3.36672	215	91	338
98	2	258113	258256	TCGAAAAAAAACGAGAAAAAGTCATCATGAGACTATCGTATCTAATGACTGTGGCTTCTCCCAACAACCTTAGCGTCTGCGATGACGATATTTTGAAGAACAGTCAAATCCGTTTGAATAGTGCGCCACACAGGGATAATAATA	-	-							3.08442	252	104	236
99	2	259605	259744	ATCAACTAATAGTTATATTATCAATATATTATCATATACGGTGTTAAGATGATGACATAAGTTATGAGAAGCTGTCATCGAAGTTAGAGGAAGCTGAAGTGCAAGGATTGATAATGTAATAGGATAATGAAACATATAAA	-	-							9.28462	830	192	755
100	2	260236	260411	CACCTGGGCCACAATCACAGTTTCCGCAGTATCCATCATCAGTTGGAACGCCTCTGAGCACTCCATCACCTGAGTCAGGTAATACATTTACTGATTCATCCTCAGCGGACTCTGATATGACATCCACTAAAAAATATGTCAGACCACCACCAATGTTAACCTCACCTAATGACTTT	260309	-	CTGAGTCAG		CG		YR		8.29656	659	205	725
101	2	263765	263907	ATAAAGCTAGATTTGTTGCAAGAGGTGATATTCAGCATCCTGACACTTACGACTCAGGCATGCAATCCAATACCGTACATCACTATGCATTAATGACATCCCTGTCACTTGCATTAGACAATAACTACTATATTACACAATTA	-	-							2.79166	203	96	240
102	2	265182	265343	TATCGTCTATCAACTAATAGTTATATTATCAATATATTATCATATACGGTGTTAAGATGATGACATAAGTTATGAGAAGCTGTCATCGAAGTTAGAGGAAGCTGAAGTGCAAGGATTGATAATGTAATAGGATAATGAAACATATAAAACGGAATGAGGAAT	-	-							9.87013	866	190	834
103	2	267120	267279	CTTCCTTATCTTGTGTATTTACTGTATCATGGACAGATTGGTGAGTGCCAGGTGCATTTCCTGAATTGTCAAACGTCACCAATGAATCAGGATGGTGAGTAGTAATACTTTCGTTGACGCTAGCATTCGAATTCCTTAACACAAAAAACACAACAATGAG	-	-							4.14566	314	127	353
104	2	269715	269862	GGACGCGATCCTTTTTTAGCACGTGAACGGTAATAACGGGTCCTGGACGATGTATTAGAGTCACCTAATCACCAAGCGAGCCAATGGCGACTCACTTGACTTGCATGTTTGCATAACCTATTTAGCGAACCCTCCAACTTCTGAGCGC	-	-							4.90893	402	142	399
105	2	272472	272645	GTCATTACATCTAGCGTTGCCGCGGAACATTTTCTCAAATTCCATTGCGTATCAACATCGCCATCTTCATCATCATCATCATCATCATCATCTTCGTTGTCATCTGCATCCTCTCCATTTCCTGCCTCTTTCTTTTTCACAATACGGGGTGCAATGGGCTTGATGTCCTCATCT	-	-							6.425	650	187	395
106	2	274025	274180	ATCTAGAGGGGAAACTTAAAGAAATTCTATTCTTGTCAATAAAGTGGAAATGTGTCAGATGTCACAGTTTCTTTATTTGTGACACATATTTTCAACATAAATTCAGGCATTAGTGCTTTTATAAGCATAAGAAGTTGTGGCGATATGAATATTCCA	-	-							10.2831	757	223	987	ChIP
107	2	298351	298526	TGGCAGGTTTGAAGATTCCAAATGTGATATAAGAGAATCGCCTCTCGGTGGATTGGGTGTCTTTGCAAAGACTGATATTGCAGAAGGTGAGTCAATATTGACGTTGAACAAATCCTCGATTTTTTCTGCATCTAACAGCTCCATTGCCAATTTGTTATGTGACAGTAGCATCGATG	298441	-	GTGAGTCAA		TC		RR-YY		6.54524	469	186	597
108	2	308989	309151	AAGATATTGATTGGGATTTTTTATTTAGGGAAACCAAATAATTGCATATGCTTGTTACATCATCATCAGTCATATAAAGTATGTTGTCCGTACTAATGGTGGTATTTACCTTCCCCGAGTGTTACTGATAGGACCAACAAACTTACCGTTAGCATTATGTATC	-	-							7.14644	532	175	660
109	2	309961	310127	TGAGGATCATCCAACACGTGCGAGAACGTATCGACATCTTCGTTTGTCACAGACCCGCTGTTGTTGTTGTCAAACTGAGAATTCCTGTTCGAGTCTGAGTCAGAGACAAACATCGGTCTCATCTTCTCCCAAAGTCGAGATGCAGGCACCAAGAGCAGCCACGAAGC	310059	-	CTGAGTCAG		CG		YR		10.9052	866	308	913
110	2	319036	319223	ATCTGGAACCACTGGTTTGCCTAAATCCGCTATTATGTCTTGGAGAAAATCCTCCGTAGGTTGTCAAGTTTTTGGTCATGTTTTACATATGACTAATGAAAGCACTGTGTTCACAGCCATGCCATTGTTCCATTCAACTGCTGCCTTATTAGGTGCGTGCGCCATTCTATCTCACGGTGGTTGCCTTG	-	-							26.228	2290	444	2283
111	2	324203	324419	TTTCCGAAGCCGCATATGAGAAATTGAGCAGGAATAATAGATATTTACGAAGAGGTAAAAGTGATAAAAGGCAGCGCCGTGGCAATATCTATTTACAATGACTCATTCTGACTATTTAAAAGTATGTAAGGGCTTTATCTAGGCTTTGTGCCGTTCAGGCTTTTTGTATACACATGTGATAATTGTATTACAGCTTGTAAGTAATTCAATGAACGTT	324304	-	ATGACTCAT		AT		RY		71.7833	7577	1057	5097	ChIP
112	2	331638	331790	GGCTAAATCGTTCGGATCGACACCGAGCGGCACGTACTATATTATCCGAACTGATTACTCATCTAGAAATGAAGGGTGCAACTTCTAATGTCACGCAAGAAGTGAAAGTATTATTCATGTTATACCTGAATAATAATCATATGTAGGAGTAAA	-	-							6.39886	434	162	628	ChIP
113	2	336012	336209	TTGCTGGAAATCAGGATGTTGGGTAATCGAATCAGCGTCGATAATGGCCTTATGGACCAGTTGATCACGATCAATCACATCATTATTAGTATCGTTGTCATCTGCATCACCCAAGGTGGTTAATTCCGGATCTACGTTTCCAATTTGTCTGTCATCGTCATCATTATTGTTTTTCCGCTTTTTCTGTGAATTCTCATG	-	-							2.80734	216	78	244
114	2	336357	336516	ATCTTTCTTATTCTTGTCGTCGTCGTCATCCACGACTATGTCAGATTGAGAAAAGTGATTATTACTGTCATTGCCGTTGTCAGTGTTATTATTGTTTTCGTCATCTTCGTCGTCTTGTTGATTATGCGCTGTTTGCCTTAAATACCAATCCATAACTGCG	-	-							4.63185	343	146	404
115	2	352337	352488	CTTGGCCATTTCTTTGTTCTCGTTTGTTAAGTTTTCTAATCTTACCACCATTTTGTGAGCAATCGATTCTGCATCATACCTGCCATACTTAGTCACTGAATTTGTTGGATTTAGCGCCAGTGCAGTTAATATACTTTCCAGATTTTCTTTCG	-	-							4.59526	316	127	438
116	2	352698	352979	ATTTGTAGTTCTACTTCCAATGCTTCCATTCTGTCATCTTTATTTGAATTCATCTCATTGCTGTTGACATTATTCATTGAGAGCGCTGTCACATGATTAAAAGGAACAAATGAATTCTTGAATGCCGTACTATTGATTGAGGTTTTAGCGGTCATATTAGACATTGATGACATCGAGTCATTAGGATTCCCATTAGTATCCTTGTTATTTGTCATATTATTCATTGGATCCAGCCAATAATCATTAGCAGTTGCCCCATTCATGATATTGTTATGATTGAGA	-	-							15.0248	1281	302	1291
117	2	356496	356754	GATTTCCCATTACGTCTTTTAGCTTCCTTAGTGGTGGGTATGTACACCATCGAGCTTTTATGTTGTGTCATTTCTTCCCCTTATGATATGTTCCACCTTTGTTCTTCCGGTTTCTACACTCTTTATCTCTAGTACTTTTAAAATGGTGTCATTTCTGTCAAATTGCGAGCACTATTACTCTTCACTTAACCGCTTCTCGTTAAGCGCGTCAGGAGTAAACGTCATCTCGCACGATATGCTTAATGCATATGATTTGAGT	-	-							3.37717	251	99	297
118	2	358956	359148	CCGACATTTTGAGATGGTATTCTAGAAACAGCGGCATGACCGTCACTAGCGTTCATGGGAAGTTTGGATGAGATTTCAAAAGAAGAAAGAAACATGTCATTCAGTAAGTTTTCTTCTGAGTCACTCAATTTATTGTTCTGCATAATTTTCTTTTGTTGTAGCTGGTACATTTGCAATTGAACATTTTGTAATT	359075	-	CTGAGTCAC		GG		RR-YY		8.34361	622	172	803	ChIP
119	2	363585	363760	TATTGGAGCAGAAGCAATTCTGAAATGAAGGTCCTAATATGACCCCAATATGACACATAATTCGGAATCTGCCACTTGTGAGTTTTATCAAGCCTATGCGGATGTTTGTGACTAGTTGGATATGACTGAATTAATACTTTCAGAAATGGACAAGGAGATATGTGATTCTCTATTAT	-	-							16.086	1399	310	1372	ChIP
120	2	372453	372618	ATGGCAATTTAACAATTGTCTTAGTGATAGCATCAAAGTCCAATTCACTAAACAAGGTAGTGTAAGCGTCATCGGTGTAAGTCATGACTTGTTGATACACACTCAAGACATCAGATGGAATTTGGAATCCACTGTTGCCAGTTTCTAGACCCAAGTAGTCAGAAAG	-	-							10.4713	789	287	932
121	2	376250	376398	TACACACTTAGTCCGTTTCTTTTTTTGCGCGTTATATTCTGCTATGTTTTTTCGTTGGTTTATATGATGAGTAATCAAACTCATCCATCAGTCTGCAACATTAGTAGGTGCAAGGTGGAAGCTTTGTGCGCACAACATGTTTGATTGCA	-	-							3.87905	279	115	348
122	2	377279	377456	GACAGAAATCAAAATAACAGCATTTATAAAGTGAGGCACAACTTTGACACCATGTGATGCAACAGCAATGACAAATGGGGAGGCATGGGATCCAGAGGAGTCACTAGACCCTAATAATTCGTCACTGTTGTATGGAACAAGAAAGCAAACCAAAATGGTGGTGAGCATGTAAATCAGC	-	-							20.446	2014	361	1537
123	2	384025	384216	AGTTCATGTATGATTGCTTAATGGGCTTGGCAAGACCAACTATTGAAAATCCGGATATCGATTGTACTACTAAAAGTTTAGTGTTAGAAAATGACTCAGATATTAGTGGATGCCTTTTGGCTGATGATATGGGTTTAGGTAAAACACTAATGAGTATAACTTTGATTTGGACATTAATTAGGCAAACTCCTT	384119	-	ATGACTCAG		AG		RR-YY		12.3795	1029	261	1079	ChIP
124	2	386535	386763	GATTACTTGCTCAAAAGGGTTCTTGAAATTACAGGGAATTCTTCGTTTGCAAGTGTTTCAGATGACAAAGAAAGCGAGAGATCCATATTATTTCAGCAACAAGATCCTTTCAATGAGTCATCTAGGTTTTCGAGAGTGACATATTTTGAATCTTCTAATATATTAGTTAAGCTTGAGGGTAAAAATCCTGAGGAAGAAGGGTTACTTCTTTCAGCTCATTTCGACTCTG	386651	-	ATGAGTCAT		AT		RY		311.85	37818	3079	18755	ChIP
125	2	402251	402487	GATGGGCAGTTTCAAACCCATTGGCCATAGCAACCTTAGATATGTTCTTATGCATGAATTTCCATATCAGCTCCCTGTTGTTTTTGTAATCATGCGTTGGAAGCTGTGACACCGGATCAATATCGAGTGAGTCATCAATAATAGTGTAATTATAAATGTGGTTGTTAAGGAAAGCGTTGGGATTGCTTCTGGAGTTTTGAGCCGATAAAGGGCTCTGTAACATTCTGATCAGGGATA	402381	-	GTGAGTCAT		AC		RY		2558.3	400309	14149	74905	ChIP
126	2	411333	411501	AGCAATGTAGACTGTATCATAGAGAAGTTACCAGCAGAAATCACTGAAGTTGAGCTTTTGAAGAAAATTAGTGACATCAATGATGATGACTCTATCCATGGGTTGCTAATTCAACTACCTCTACCGCGTCACTTGGATGAAACCACGATTACAAACGCTGTGGACTTTA	-	-							4.57957	338	115	423
127	2	419885	420072	ATAGAAGCCGCGGTTAATAGAAAAACGGCAAAAAAGTTATGGTCGGTATGTTCTACCCCCCTGGATATAATCGTGTGACTAACATACGTAATGAATCCTAGCTGTGACTCCTCTCGAACGAAGAAGAAAGAGGCAATGCATGCGTAGAAACTAAATCTTGAGATTTCTGTTTGATGAAAACACTGCAC	-	-							114.233	12928	1712	7214	ChIP
128	2	425557	425727	CATACCTAACGTAACAGGATGGTCACATCTATATTCTTGGAAGGCTTCGACACCTATTTCCAAGGAGACCAATAGAACTCTTGAGTCATCGACAGCTTGTGCAATGATACCATCTTCTTTACATTGGAAATTGACCAACTGGACACAATCTTTGAAACCATCAATTATTCT	425641	-	TTGAGTCAT		AA		RR-YY		8.06653	532	253	758
129	2	428687	428838	ATGGATTCAAAACATTGTCTGAGTTGGCAAAAGTGGTTTCCATTTCCAAATCATCGTCATCACGGATGAAAAACTCGTAATCATCGTTCAAGAATGACAATGAGCCGTTGAATTGACGTGTGTAATTGCTCAACTTATACCATGTTTTCATG	-	-							11.0412	880	273	963
130	2	430548	430695	ACATCGTCCGAGTTGGCAAAAGTGGTTTCCATTTCCAAATCATCGTCATCACGGATGAAAAACTCGTAATCATCGTTCAAGAATGACAATGAGCCGTTGAATTGACGAGTGTAATTGCTCAACTTATACCATGTACTCTTGATAGTCT	-	-							7.48624	575	165	697
131	2	449371	449525	TTGTTTACAAAAGGTGAAAAGTGAAAAATTTCGCAATGGAAAACGTCGCGGGCCGCCTTTGAGTGACGTTGTGCAGGAATCTCGAAGAGTCATCACTTTGAAGATAACGGCCGCTCGCGATGAGAGAAGACAATGAGCATTGCTTTTTTATAATT	-	-							14.6484	1155	345	1302	ChIP
132	2	451897	452068	CTTGCTCCGACTGCTTTGATGTCACAGCTTTGGGTTTCTCCGCTACACTGTCTACCTTAGGATTATTGATCATGACTCAAGCTTGCGATATGTGTTGGTGTCATGCACAAGACGCCACAAATGATAGAACAGAAAAGAAAGTGAACTAATCTTCCAAGACGAAGAAAACCAA	451972	-	ATGACTCAA		AA		RR-YY		28.8994	2566	612	2350
133	2	453609	453765	CGTTGTGTCGGGATCTCTACACTAAATTGTAATGTCTCTGGGATTTTGTGGGGTGTCATTGCAGATATGACGAACCGGATATTACTGATAATGACGATGATTCATGAAGGTCTTCAGGTTCATATGTACAAAAAAGGTAGAGCTGTGGTTTTTTATT	-	-							13.1846	1104	280	1140
134	2	466428	466628	GAGTGTGCACGAAAAAAATAAGCTTTTCTCGTGCCCTGAGTGGTGCACAAAAGAAGAAAAGGGAAAAAAAAAGCGAACGAGGAGTGACGTGGACGCGATGAAGGTGACTCAGCCAATCCGGGTGAGCCGCACCCTTCGTCCTCAGTGACCTCTCACGTGCCCTGTATCAGCCAGCCACTGACAGTTTTGTTTTTGCCGCCC	466535	-	GTGACTCAG		GG		RR-YY		65.7869	7368	1061	4155	ChIP
135	2	474962	475100	AGCCCTCAAGTGAGCCAGAGTTTCAATAGGTTGGTGCGTTGGACCATCCTCACCAAGCCCGATAGAGTCATGTGTTGCAACCCAAATGACTGGATTACCAGACAAGGCGGCTAACCTAACGGCTCCTGCAGCATAAGAG	-	-							5.95449	447	189	503
136	2	479573	479736	ATCACAACCGCTGATGTTACTAGATGATCAAATGGGCCTTCTTGAAGTTTCTATTTCAAGATCATCAAAGATGACTAACCAAGCATTTTTAACGTTTGTCACTCAAGAAGAAGCAGACCGGTTTCTAGAAAAATACACGACAACAGCATTAAAAGTTCAAGGTC	-	-							6.72821	437	155	695
137	2	492995	493145	ACCCGAATGCTTATTACACTGGCTGCTATTGTTTATGACTGACTACATGCAACTTTATACACACGGCAGGAAAAAAAGTGCGCACTCTAGCCTACCACGTACCATCGGTCATGAGGTCCTGTGACTGTTGGAGGTGGTGCGGTCCGCCTTG	-	-							2.38389	171	98	197
138	2	496656	496779	TCAATAAATTTTGAGATTGCGTAGTCAATTGTAGATTTGTTTTTGTCAGCATATCAATCTGGTCATGCAGTGATTCAATGACTCTCGAAGATGAGGCATTTTGGCTGGAGGTATTTCTATCTTT	-	-							3.37717	251	91	305
139	2	501136	501317	CAATGACACCGGAAATAGCAATCAACTGGACGTGCCTGTTTTCTAGTTTACGTCGAGTTTCTGTGAAATATAGCAGGTAAGTCCTTGAGTCATCATCAATAGAAGACCCTCTATCCTCATGTTCATCCACGTGAACATCGCCCGCTTCGGGTATCGTGTTTATGTGACCCACTGACCCAGAA	501224	-	TTGAGTCAT		AA		RR-YY		5.15464	338	151	498
140	2	509134	509287	TGATATGGGTCATAAATGATATCCTCGTTCCTGCGTTTTGGCAAAGTGAGAATCCCAGCAAGCAATTGTTTGTTGCCCTTGTCATACAGGAATCATTAAAATATTGCGGGCTAAGTTCAGAGTCATGGGATATGAACCATAAAGAATTATATCC	-	-							1.98657	129	74	177
141	2	518751	518897	CAAATTTTTCCTATTCCTTTCAGGTAAGGACTCATTGTTGGTTAAAGAATGACAAACATTCATCAACAACTCGTACAATGAGACTCTTATTTCCGAAGGACCGACATCAATTAACAGAGACACAGCGAAAAGAATCTCCGGTAAATA	-	-							5.56241	627	81	356
142	2	525463	525608	TTAGTGTTGGTCGTCTTTGATGAAGAAGATGAATGATGAAGATGGTAGTGGTGGTCATTATTGACATTTGTTAATAATGATGATACACTAAAAGTGGAATAAACGTCATCGAATAACAGTGAGACTAGTTGGGATATAGACGTTTT	-	-							3.54969	261	105	315
143	2	533441	533630	TGAATATATCATGTGTTTGTTCTGCTATCTGCTTGTAGAAGGGTACGCTAACAGAGCCGGCGGCATTGTAAAAAGTTCTCCTTTCGCGGAAGGATGAGTCAAAAAGCATGTGACAATGAAATAATCAAATTGTGACATCTGCTGACGCGGGATCGTTCCTTCGTATTGTCTAGATTGTAATCTATATAAC	533538	-	ATGAGTCAA		TT		RR-YY		5.47876	354	161	533	ChIP
144	2	536288	536511	TTACTGCACATAATACTTCATCTTTTTTTTCCTCTCACCCGCAAAGCAAAGGGGCCTTGCAGCAATGACTCAAATTCCATTGGAAAAAAGAAGGAGATGATAAGATGCAAATCAGAATAGATTTTACTATGACCGTTACATGTAAAAAGAGTCATAATATAAACCATAAATACTACAAATAACACCGGGTTCAGGCATATAAATAAACTATTCTCCTGTAATAT	536356	-	ATGACTCAA		AA		RR-YY		34.19	3526	452	2569	ChIP
145	2	541275	541598	ATGGCCTTCAATCTTTTCGAATAATTTATTCGATTGTTCATTCTCATCTCTATAATCATTCGCCGTACGTTCAGGATATGACGCATCAAGCAGCGAAGCTAAACCTGTTGGAAATAAAGATCTGTCATAGTCATCGTCTTCTTCATCATCATCAGCACCATTATTACTATAATCATCATCATTGTCATCATCATCATCATCATCATCATCATCATCATCATCATCATCATCATCATCATCATCATCATTAATATTGTTGTCATTGTCATTATTGTTACTGTTACTGTAGTTATTGTTATTATTATTAATAGTACTACTACTATT	-	-							281.508	38676	3405	11853
146	2	547580	547721	GACGCGAGAGTATCTAGGGGCCCTGGAGTGAGGACTACAATTTCACATCCCGAGACCAAAACAATGACGCATTATTTGAGACATCATCACGATGGAATACTCGTAGGAAGTGGAACAGTGCTAGCTGATAATCCTGGATTGA	-	-							4.34432	303	136	392
147	2	548082	548274	TGGGTAGCTCAGGCACCGAAGTTAGCCCACCCCAAACAGTAAATTTAAAGGATATGTCATGGTGGAAGGGCATTACCGATGTGGTGCTTTGTGCGAGACTGGCCGATGACTAATAGTGTTAGAACTCCACCTTCTGTGTAATTTCTTTCTGAAATTAGTGAAAAAAACGCGCCTTTCAAATTTTCATACTAGT	-	-							43.5635	4323	762	3248	ChIP
148	2	550039	550238	GTAACGAACTATACAAAGCAAAAAGATTCAAGGATGCAAGGGAACTTTACTCAAAGGGCTTGGCTGTAGAATGCGAAGATAAATCAATAAATGAGTCACTATATGCCAATAGAGCGGCATGTGAGTTAGAGCTGAAAAATTACAGGAGGTGTATCGAGGACTGCAGTAAAGCTCTAACTATTAACCCCAAGAATGTTAAG	550133	-	ATGAGTCAC		GT		RY		54.6935	5378	892	4192	ChIP
149	2	569477	569636	GTATGTTATCTACTCTCAACAATAATAACGTTAACAAAAGGACACATGACTACAATGCTATCGACTTTATGACCAAAAACTTACTTGCATGTGATGATGACAGTATTCATCCGGTCGTAAGTTCTAAAAGGTCAAGAACGTTGGCATGTCCAGATGAAAC	-	-							6.05382	462	190	506
150	2	569811	569956	CTAATATTATAGGAAATCAGCATTAAAAACATTATGTATTTCTTTTTTCAGCGGCCGAACGGTCACTAGAATGACTCAGAATGGTTTTTATCATCTCGTTGCCAATGAGATTAGCCTCTGGAAGCATTGGCTCAAAGAACTTTTGA	569885	-	ATGACTCAG		AG		RR-YY		4.19272	283	118	401	ChIP
151	2	570575	570719	CAAGGATAAATCTTTATCTTTGCCCACGCAGATCCCATACTTAAGAAAGCAGCATGTGTCACAGCTTGTGTATCAGCGGTAATCTTGTCATGCTCTTCATATGTCAAATAAACTTGCTTACTTTTCAAACATGCCATAACAGAAT	-	-							5.75583	420	173	509
152	2	574697	574840	GTAAAGTAATTAGTTTAGTTGATGGATATGATGAATTAGCAGGGAATACTTCCAAACGGTCTTCGTCATCGACCTGCTTATCCCAAGTGTATGACACTGAATACGGATCAATATCTTCAAATTTAAACGGCCTGACCCTTAAAG	-	-							3.35626	227	111	305
153	2	576627	576780	AATCCGGTGGAACTAACGAATTTCGAGTTGGTTTCCGTATCGGTATTCGGGAACCCATGAGTCAGCGTCACTAAAAGATAGTCTACCGGAAATGCAGGCTTCGCATTTTCCTTCACTGTTATACCATATTCATTCGACTTCATGTAAAATATCT	576687	-	ATGAGTCAG		CT		RR-YY		3.08964	190	93	310	ChIP
154	2	582792	582948	TCTTTGATGAAAACAATATCTGCACACTCAGAAGCAGTTGTGTCGGTGGACGTACCCATGAATGATTCATCCATTCTGAGTTCAGGTTCATATGACGGGCTCATACGGATCTTTGATGCAGAGACGGGCCATTGTTTGAAGACATTGACCTATGACA	-	-							7.55943	582	200	665
155	2	587328	587474	TTTACCAGTAAATCTGTCTTTTGCTTGGCAAATAATTCACTTGATCCTATTGACTCATCAATCTGATTTGCTATGAACGCTTCTGTTGAAAATATGAAGTCATAAATTTGACCGAGGCCCTGATATTTCGGATATTCGTGTAGCGGA	587381	-	TTGACTCAT		TT		RR-YY		4.28682	276	98	446
156	2	594592	594746	TTTTTTCACATAGTCACCATAATCAGATGGTTCTATGATATTATGAGGAAGATCAGTGTTGTTTTGATGAACATTAAGCAGGTTACTCATATCAACAGAAGAGTATTCGTAGAATGTATTATTGGATCCTAAAATAATGACAGCAATGTCTACTT	-	-							4.10907	279	115	393
157	2	601716	601867	ACGAGGGATCTTTATATGCCTTTTGATAGATGAGGTTGAAGCAATAGCAAGTTCAAGAACAAATTTGTCAAGTAGAAATGAGTCAACAGATGGAATCCGAGTTGTGAACACTTTACTTACGCAACTTGACAGGCTGAAAAAATACCATAACT	601797	-	ATGAGTCAA		TT		RR-YY		2.90144	162	92	301
158	2	602795	602925	TGGTGACAAAACCTTCTTGATCGCAGCCTTGATGGCAATGCGTCACAAAAGAGTTCTGGTGTTCTCAGCAGCAGCTACCTCCCTCGCTATTATGACCATCCTTTCTGGTGTGGTGGGTCATTCAGCCGTTG	-	-							2.77597	218	97	226
159	2	605594	605711	TTTCATTTGAAAATGGGTAGAGGTACATAACTGGCGCTTTTCTTGCAAGATGACATGGCATTGGATGACACAAGTATTACTCAATACCCAACGTAAATAGCTAGAAGATTTTGATCGG	-	-							3.04782	171	111	301
160	2	629265	629486	GCAGTGGTAGCAATAATGCTGGTAAGAATTCTACCACAGTTGGTAAACTGTCATCTATCTCACAAAAGTCCAGGAGCAAACAGCGTCATGGCTCAAATTGCTCCAGATCAATGAGTCAATCACCCTTATCGACGTTCAAATCTCCACTCAGCAATCAAAATCAATCCAGCGCTCCTGATGATTTGGCTTCCATAGGTCAGAGACGCAGTGACGACGTCACAT	629379	-	ATGAGTCAA		TT		RR-YY		27.0488	2489	490	2196
161	2	634414	634552	CCTAAATTCTTACACAAAAATAACCTCATGAAATTCATTTCGAATGATGATGGTGACACTTATAATATGTGTCATTTCTGGACCAACTTCGAAATCGGCTCTTTAGACTTCTTCAGGTCCGATGCATACAGAGAATACT	-	-							5.29056	339	123	551
162	2	643544	643742	TTATACTAAATAAGAGAGGTATATAAAACACACGCCGATTGGTCATATTAATCATGACCAATATAATAGTGATTCCGGTAGTTACTATACATTGATGTGACGACTCATATTCCTCATATATGTACCTACCATAACATGTTCAACTAATAGGTCTTTAACACAGCTTCAGTATTGTCTGAGCTTCTCGTTTAACATTCCT	-	-							9.9956	853	166	893
163	2	646206	646365	TATCTTTTTCAGAAGTCCGTTATATGGATCCATCAAGTCTACGAAATGTGCAATATCCAGAATATTTGAGTCATCCCGTATTGAATCGTCCTCGCTATCTTGGCTCATAATTTTGCGATCTCCCTCGTATTTGCCTAGCAAAGTAGAAGTCAAATCATTT	646275	-	TTGAGTCAT		AA		RR-YY		8.02994	582	198	756
164	2	649692	649879	AACATGATCATGAATTCTAACATGAACATGAACATGAACGTAAATCCAGTACCATACGGAATGGGAAACGGTGCAAATATGTATGACGTGTCCAGGATGATGACTCCTCCCTTAAATATAGCCCCGAATTCCAATAATTCGAAATCGAGCATCATGAACAAGCATCCTAATAGGAACAATGTTCCGCC	-	-							28.2878	2896	491	2032	ChIP
165	2	659852	660004	AAGTTAAGCCCGACATTGAATTGATAGCTACATCGACAACATCAGCACCTGCTAGGGCACATGCAGTCATAGACGCAACAGCAGTACCTGCGGAGTCATGACTGTGAACATGAATTGGTAAATCCGGATATCTGGTTCTTAGGGAGCCAATTA	-	-							15.1764	1236	317	1351
166	2	667165	667341	GCATACCCCAAAGTGACGTTTTCGCCTCTGATGGAAACTTCGCCGACTTTGCCCGGGGGCAAGACATTGTCATTGTCATCTAGAATGACGACGGTGACTCCTTGTGGCTGGCCCACAGTACCAGGCTTTCTCTTTCCTGGAGGCAGATTGTTTGAGGTCATTTGATGTGATGCTTCG	-	-							11.3339	998	217	953
167	2	670053	670236	AAAACGGCACCTTTTGCCGTATCGTTTGTTTCTATTCTCTCACTCAAATCTTGTTCCTGATTAGTCAAATCAATGATTTTCGATTCACTGACTATGACGCAGTCGTCGCTATCATTGTTACTGTTGACCGGAGCCATATTCTCCATTTCAGCACTATACCTGACGCTCTTCCACCGTTGTGCTA	-	-							7.74764	590	220	674
168	2	670904	671130	ACTTTAGACTGGCGGATGACTTGTTCTCAAACTCGTCAAGACGATCATCTGACTCCGCTGCCTCATCCTCAGTATCCAAACTGAAGTCCGCTCAGCTTTCCAAAATAGGTCTACATCATCATCATACAAGTAATAATAAACATAGTCATAGAAGCGGAACTCCGACTTCCGAAGTGAAAGCTAATTACTCACCAGACCCTTCTGCACCGCGATTCATTGTATCCAAT	-	-							3.16806	201	88	318
169	2	678053	678301	ATAGAGGAAATGGGCGGTAAAAAGGGTCTACCAGTCAAATCGGTAAATTTGTCAATGATAGTTGGAATATCTGGCCCCAGGGACATGACTACATCTATGACACCATTTTCGGAGATCCAATGAGTCATCGTTTTATTTTTACTGGTGTCATACTTTATGTCTACCCAAGTGTCAGCTGCATTGACCCAAAAGATAGATGTGGACGAAGATGAAAACATGAATGGGATCGAACCGTACATTGGTTGGCTG	678176	-	ATGAGTCAT		AT		RY		5131.6	845668	19190	116736	ChIP
170	2	692326	692510	AGATCGAAGGAGCACATTCAAAAAGCTCCAGAGCATGATAATGAAAAAGATCCACTGGATGAGTTTATGACGTCATTGAAGGAGGAGAAAATGAGTAATAGTAAAGGCATGTACGACAGAGGCGACATTCTTGATGTAGAGGATCAATTGTTTGAACTTGGAGGAACCGACGATGAGGATGTTGA	-	-							22.9031	2206	433	1742
171	2	697123	697309	GGCTGGATTGTTAAAAGTAGCAGGCGTGTAAGGAATGGCATAGTTGTGTTCATGGTGCTCCATAGCGATTGTACCGTTAAATTTCATTGGATGAGTCAGCGAATTCTTTGTCGGATGTGGAACAAACTGGTTTGGGGGTTTGCCCTTCAGTACTTGTGTTTGCTGAGCTAAACGGATCATAGGATCA	697217	-	ATGAGTCAG		CT		RR-YY		9.93287	688	262	950	ChIP
172	2	699856	699997	TCTTCTTTTTTTCGAGAGTATGATTTGTATTTGCAGATGTATCTGGGTCAGTTGATGTTTTGTAATCGTTTTCATCTGGAGTGCACATCACGATGATTCATCAATGTATTTTATTTTTATACCTTCGTGTGTCTGTTGTACC	-	-							3.62811	241	115	339
173	2	716576	716769	AATATCAACTTATGTATGTTTCGATGTCTGACTCTTTTCTCATGAATTTTTCATTTTTTCATGATCACCTAATTAGCCGTGGAGAGAGAGAAAAATAATCCCAAAGCTACGATATGACTCAATTTTTTTTTGCAGAAGAGTAACTGATAGTATAACATCCACGAAATCAGTGAAAGGTCAGCGAGCTTTGCCTT	716693	-	ATGACTCAA		AA		RR-YY		5.18077	352	119	521	ChIP
174	2	718249	718395	CCCGCACATCTTTTTTTCAAAATTTCAAGCAAAATTTTTTCATTTCATCGTTGAGTCATTTCGCAGTAACGTACAAAATGCACAGGGTGCAGCGGGTGGGGCCACGTTTTAAAGTGATTCTGCCATGCCTTTGCCTTTATATTAAGC	718303	-	TTGAGTCAT		AA		RR-YY		3.94178	271	121	363	ChIP
175	2	718481	718629	AAGAGTGTCAATATAAGGAATGCGCTTGCATATATACGAGTACATAATTTGCTGTTGATCACGTGATTCATAATTTTTTTATTTATGTGCCGATGACAATGTTTTCCATCACTTTCAAGGCTAGCTGTATACTGGCAGTTCGTGTTCAA	-	-							4.80437	385	113	422	ChIP
176	2	724344	724570	GATATTATTTGAAAAAATCTGATGAGTAAGGCTTTGAAGAGGTAAAGGGGATATCAAGATAAAAAATATACACTTCAGCAGAGGAGGGGGAGGTACTTTAAACGGATGAAACATGACTCATACAAATGAGCACGACCATAAGGCTGAACAACAACAAAATGGAAGGGGCGATACAACAACAGAGACTGTAAACCCTCAGAAGATGAAATTGGTTACCAAACTTCTCA	724460	-	ATGACTCAT		AT		RY		516.572	70974	4959	22879	ChIP
177	2	725146	725314	ATTCATCCCAGAAGACATTTACAACATCACTCCAGGGTCCGTACAGCTAATTCAGTGCACTCAAACACTCAATCACTGACACCGAAACGAGTCATGACCAATGAAGAAGACAATAATAATCATAACAATAATAACATGATAACGAAGATCGCAACTACTCCAGAAGCTC	-	-							7.03142	488	194	665
178	2	726020	726173	TACAGAGATACTGGCATGATACAAGGTATATTATGAGTACCGTAGCTATGATGCAACACAGGAGAGAGACACATGATATAGTGAAGAGGAGAGAAATTGCACGAAGAAACGAAATTGAAATTACACAAGATGCAGATACAAACATTAGGAAGAC	-	-							1.03511	87	46	68
179	2	728061	728261	TTCCAAAACAGTCCCCATGCATTCTACAATACCAGTAAACATTGTGCTATGGTTACGATCTCACCAATTGGTTTGACATGTACGTTAGGAAGTACCGTCTTTTTATATCATTTGGATGGATCTGGAATATGACTAATAGATAGTTCAATAACCTTCCTCCATGGAAATTACCGAAAAAAAAGAAAAGGACGGAATTGGTAC	-	-							8.76183	668	213	795	ChIP
180	2	731425	731604	ATTCAAGTGATAAAGTACTTGAATTCCCAATTTAAAAATAATTACAGCACATTGATGACGTCATCGAAAACTCAGGATAGAAGGAAAAGTCATAATATGCCTTCTTCTATCTTAGACGATGGTAACAAAATTGGAATGCATGTTTCGCCTATCGATGAATACTCACATTTTATTGATAAT	-	-							4.40183	285	112	446
181	2	747519	747684	AACTTCTAGAACATCGTCAAAATCAGCCATGGGAACAAGCTTGTCCACAACGTCCAAAAGGTAATCGTAATTCAATGAATCATAGGATACGTTAGACGTCAGAAAACGCTTGATCGTAGCCAGTAGTGGTTTAACATCCATATCTGGAAGGGAGACAACAGTCACA	-	-							3.24648	221	94	307
182	2	748626	748782	TTGACGTCCACCCATTTTCTAACGTCATTTAATGTTTCAGACGAGTTGAACTCATGTTTTAGAGTCTTGCCATCAGTCATCCTGATTTGCAAGACGCATTTGCTGCTGTGCAGTTTTTGTGCGTCTTTTATGTAATCATGAACATCCAATGGCTTAT	-	-							4.98212	325	143	486
183	2	758031	758185	TTCTTGCTTATCGCTGACCACAGTATCAGCTCTATTTCTGCTTTTATTACATGTAGTATTACCTGCAACTTCATTGGTATTCGTCATAGTTATTGCACGATGTGGCCTTACAGGATGAGCAATTTTATCCTTATTCAATGTCCATGAAACAACTT	-	-							2.7237	181	82	258
184	2	806722	806878	ACTGGCCCAGATGTTAAACCTTGGTTTTTCTTGAATGAATCTTTTGAGCAAGGAATCAATGTTGAGCAGGAATCCAGAGATGATGACTCAGTTCTCAATTTTTGGAAAAGGGCCTTGCAAGCCAGAAAGAAATATAAGGAACTTATGATTTATGGTT	806808	-	ATGACTCAG		AG		RR-YY		6.25771	422	159	616	ChIP
185	2	812185	812365	TTACAGTAAAAATTATTCGTTTTAATCATGCGTCAGTGTGAGATTCTATGACAATAGTATAAGATGGGGTGAAGTAAAAGCGTCTGTATGACTATAGAGTACAGTTATATTACAATATATGGAATAGAGCATAGTGGTATGACGATATTAAGGAACTTTAAGTTAATGATACCATGATAGT	-	-							3.9836	286	97	380
186	3	1116	1255	CCATGACGTCATTAACGTAAAAGTTCCTTAATATTGCAAATTGCTTGAACGGATGCCATTTCATGTTGAATGTGGTAACCCAATAGCATGATATGAGTAATGCTTTAGTATTGTTTCAGAGTTGTTTCAGTAATGTTTTA	-	-							2.18	139	76	203
187	3	1933	2124	CGTTGTTATTAATGACCTTCTTACCCGAGTTAAAAGAATCATTCCACGAGAAATTCGGTGACTCTAAGGCTCTTCAGCTATCACAAGTCATTAGATTCTGTAAATTAAATGCGTCATCGAATTCATCATCTTCGGTCTCAGATGCATTGGTTGCACAAGACAGAAGAAACTATCAAAAGAAAGGAAATAAGG	-	-							30.5044	2834	522	2480
188	3	4012	4169	ATGATAAGGGAACCAGAAACTACAAAATAACCATACTCATGCGTATTCAGTTATGGGGGGATGTTAAATGTGGTAACCTAATAGCATGATATGAGTAATGCTTTAGTATTGTTTCAGAGTTGTTTCAGTAATGTTTTAGACAAAGAAAACATATAATA	-	-							2.593	207	64	228
189	3	5112	5307	TTCCAAATCATTATCGAAGATTCTTTGCTTATGATATACTGGTGCTCGAGGATGATGAGAGGACACAACTTTTTGAGGCTTATCGTTATCGTCTGAGTCACAACAACATACATTAACTGTCCACGATTCAGGGATGTGCTATGAGTTCAATTTTCGCTGTAGTGCTGCCATTGGCGCTGCTACTGGTGTCTGGAAA	5208	-	CTGAGTCAC		GG		RR-YY		22.1137	1875	499	1856	ChIP
190	3	6111	6301	TCGGTACAACATAATTAATGCATTCATACAGAGCGCATTTCCAGCATCATTTATTGGATAGTAACTCCTCCCGCACTTTCAATATCAATGACGCTGACTCTTTTACTGACGCTGAGTCTTTACCGACGCTGAGTCTTTACCGACGCTGAGTCTTTACCGACGCTGAGTCTTTACCGACGCTTGTGAAAATA	-	-							6.74389	592	144	556
191	3	17356	17501	CAATTAGATCTGTGGATACAACGTCAGCAGAGATCATCAATATGCCAGACAACAGATCAAGAGTCATTGGATAAGTTATCCCAACAGTACAACCAGTATATGTCTCAACTGAACTCTTTGTATGTTAGATCGGAATCTGTTCGAGA	-	-							2.93804	181	105	277
192	3	20332	20499	TGCTTTAGAATAATTTCATCATCTTCCTTTTCACTATCGGATTCTCTACGATTGTCATTTTCACTACCAGATGATTCATAATCGGCAATTTCATTACCACTCAATGCAAATCCAGAAGACTCTGACCCTGAGTCAGAACCGGAATCATGGGCGTTCAATTGAAAGTCA	20463	-	CTGAGTCAG		CG		YR		6.75958	516	161	617
193	3	26082	26240	ATTTATTTCGATTTACATCCTCGTGATGGTAAATATGGCCACGCTGCCAATTTTGGTTTATCGTCATCATTCATGATTGATGACACCACAAGATCGTATCCGGTTACTGCGTTGGTTTGCAATTTCTCCAAATCTACGAAGGATAAACCTTCTCTACTG	-	-							5.42125	359	140	541
194	3	26601	26742	AGACAGGATATTTCTTTGATTTCTAATGGTGGTACGTTATCCAAGGGTTATGATTCATTTGGCCATATAATGTCAGACTCTTACTCTGCCGGTTATTACGGTTATCTATGGGCGGAAGTCTTTGCAACTGATATGTATCACA	-	-							3.08442	227	91	274
195	3	33254	33379	CCAGAAACAAGATGAAGCAGATTCTTCGGATGAGAGTTCAAGTGATGACTCCGATTTCGAAATTGTGGCCAACGATAATGCATCAGAAGAATTCGATTCTGATTATGATTCAGAGGAAGAAAAAAA	-	-							3.91041	263	108	378
196	3	35288	35440	CACCAGAACCTCCACGAACAGTCAAATGAGTGTCATTTTGGCGCATATGATTACCGATATCCTCAGGGGCATTGTAGAGTACAGTCACTCTATGTCTTGTCACCATTACTCAGCTAGAAACGCACACTTCTTGCGTTTATTCTCCTCCCGATT	-	-							4.85665	365	131	434
197	3	36472	36776	TATTATCCCCACTGCGGCCTTCCCTTTGTGTATCTGAACAGGCCATTGATGTAGATGATTCAGCTCTCAATGGGTCACCGACCCATCACAACCATGGGATGCAAAACGCCAATGCACGGAATTCCAACACATTCAATTCGTTGAAGATCAAAGGCCAAAAGCAAAGATATTATCATTATACGAAGCAGCTACCTTTGACCGTAGGCTGTGACTCGCAATCTCCAAAAGAACAAAGGTCGGCTGCTTCAATGACAATCAATCAGGCAATGACACCTTCTTCCCTGGCCTATACCCCTTCTAAACTA	-	-							10.257	1157	161	644
198	3	37367	37536	TATGGTTGATCTGTCCTCTTTTGTCAACGCGCAGAGAAAAGCCTCAAATGAAACTGGTGACTTAGTCTTTAGTTTATCCCAGGATGATGACGCACTGAAAACGTTCCATGCGAGCAACAGCGCAGCAACAAGCAATGAAAGCTGGTGTATTAGCGATGATGCGTTAGGAA	-	-							5.16509	342	183	463
199	3	38594	38740	GTTTGCCTAGTGGATCCTCTCCTTCTGGAGTTTGGCCACGCTCTGGCTTTTCGATCAGACTTGGCATGTGACTAATCAAGTATGGCATGCTGGTTTTTGGGTCCTTTGTTTTCGTTGTTTCAGTCTGGATAAATTTTAAGTTACCAT	-	-							3.70653	244	132	333
200	3	45103	45308	GGGAAAAATGAATTGTTTAGTTTGAAATTGAGGTTTGTTAATGTGTCCAGTCAATGGATCATAAGAAAAATTGTCGCTTGAGTTAGACAAACGCTCATCTGGGGTTAGTGACTCATATAATTCCACCACTACTAACTTTTGTTCTGGAACAGGTTCAGAACTGAAATAGGAATAAACGACCCAATATTCACCGAAAACAATATCCA	45214	-	GTGACTCAT		GT		RY		90.1486	9005	1380	6859	ChIP
201	3	58084	58212	TATTACTGTTGTGGAACTTTCTCCTTTGAGGACCATTGCTGTTATGGTGATGACTGTGGTGATGATTACGGTGGTGAGGTGGTTGTTGCTGTTGTGTAGATTGACCATTTTCTTGAGAGGTAGCGTCTT	-	-							2.82825	227	99	215
202	3	68385	68724	TTGTGCTATGATATTTTTATGTATGTACAACACACATCGGAGGTGAATATAACGTTCCATATCTATTATATACACAGTATACTACTGTTCATAGTCATATCCTTTTCTTACCTTCTATATCGAATGACTGATAAAAAAACGTGAGTCACTGTGCATGGGTTTAGCAATTAATTAACTAATTTACCGGAGTCACTATTAGAGTCAGTTCGACTGCCTAGAAGAACTGCTGGTTGTCAGGATTGTGATGGGGGCATTCTGCTGTATTATGACCCATCGTATCGCAATGCTCACACCACTGTTGTCTTCCTGCCGTGGTATCGACTGGTGCAGGGGGGTCGAA	68529	-	GTGAGTCAC		GC		RY		934.395	134459	6730	37546	ChIP
203	3	72641	72845	AGACCCCAACTGGGGCTCCACAACTGAAGCAAATGAAAATGCTCTCCCGGATAAGTAAGGGTTACTTCAATGAGTCAGATATAATGCCTGACGAACGATCGCCCATCTTGGAGTATAATAACACGCCTCTGGATGCAAATGACAGTGTGAATAACTTGGGTAATACCACGCCAGATTCACAAATCACATCTTATCGCAACAATAA	72714	-	ATGAGTCAG		CT		RR-YY		22.8874	1880	452	2047
204	3	75342	75530	AACCAAAAATGATCAACCTTTATATCTCTCTTCGATCACAACATGGGTGGAGACAAACACAAAGTAGTGATGACCCACTCAGGTGTTAAAGTGTGTCATATCTGCAAATGACACTGTATTTTTTTTTCCTTTGCCATTTATTGTCGCAGTAAGGAAAAGCGCAGAGCAAAGCTGACAAATTGAAAAATT	-	-							48.3783	4523	713	4019
205	3	82705	82885	GAATAGAAATCAACTATCATCTACTAACTAGTATTTACATTACTAGTATATTATCATATACGGTGTTAGAAGATGACGCAAATGATGAGAAATAGTCATCTAAATTAGTGGAAGCTGAAACGCAAGGATTGATAATGTAATAGGATCAATGAATATAAACATATAAAACGGAATGAGGAAT	-	-							40.8345	3317	988	3507
206	3	84081	84241	AATCAACTATCATCTACTAACTAGTATTTACGTTACTAGTATATTATCATATACGGTGTTAGAAGATGACGCAAATGATGAGAAATAGTCATCTAAATTAGTGGAAGCTGAAACACAAGGATTGATAATGTAATAGGATCAATGAATATTAACATATAAAA	-	-							62.1797	5069	1454	5376
207	3	84301	84467	AATAAAAATCAACTATCATCTACTAACTAGTATTTACGTTACTAGTATATTATCATATACGGTGTTAGAAGATGACGCAAATGATGAGAAATAGTCATCTAAATTAGTGGAAGCTGAAACGCAAGGATTGATAATGTAATAGGATCAATGAATATTAACATATAAAA	-	-							63.3456	5050	1597	5475
208	3	84809	84987	TCTGTTGGAATAAAAATCAACTATCATCTACTAACTAGTATTTACGTTACTAGTATATTATCATATACGGTGTTAGAAGATGACGCAAATGATGAGAAATAGTCATCTAAATTAGTGGAAGCTGAAACGCAAGGATTGATAATGTAATAGGATCAATGAATATTAACATATAAAATGAT	-	-							44.5358	3544	1131	3847
209	3	85359	85538	ACAGCACGGCATGATGACCCCAAACAAAGCTATGGCCTCTAACTGGGCACATTACCAACAACCGTCTATGATGACGTGTTCACATTATCAAACGTCACCTGCGTATTATCAACCGGACCCACACTATCCGTTGCCACAGTATATCCCACCACTGAGTACTTCCTCACCTGATCCAATCGA	-	-							14.0994	1139	340	1219
210	3	86305	86451	TCTAGTAAATTCTCAAGGGTGAACAATGATCACATTAATGAATCAACCGTTTCATCACAATACTTAAGCGATGACAACGAACTTAGTCTTAGGCCAGCAACAGAAAGAATCTAAGCCAACACACACAATAGACTCGAATGACGAACT	-	-							2.54595	175	92	221
211	3	89043	89217	AAGCTAGATTTGTTGCAAGAGGCGACATTCAACACCCCGATACATATGATTCTGATATGCAATCCAATACCGTACATCACTATGCACTGATGACGTCACTGTCAATCGCATTAGACAACGACTATTATATCACACAGCTGGACATATCCTCTGCTTACTTATATGCTGATATCAA	-	-							10.5079	828	271	912
212	3	90435	90607	GTATGTTGGAATAAAAATCAACTATCATCTACTAACTAGTATTTACGTTACTAGTATATTATCATATACGGTGTTAGAAGATGACGCAAATGATGAGAAATAGTCATCTAAATTAGTGGAAGCTGAAACGCAAGGATTGATAATGTAATAGGATCAATGAATATTAACATATA	-	-							11.4803	932	272	994
213	3	97686	97873	GCTGGCCCGTAGAACTGCAATACAAATGGCTGAAGAGAAGGGTAGTCGGTGTGTATGATGTAGTGGATTTGAATGATGAAAATAAGAGAAATTTATTAGTCATATTCAGTGATTATGTGGTTTTCATCAATATACTGGAGGCAGAAAGTTACTACACTTCAGATGGATCAAACAGGCCCTTAATCTCA	-	-							14.272	1162	273	1295
214	3	100048	100240	CTCCTTAAGTGAGGGACTAAAAGTCAATACTGAGGAAGATGCGGCAATTATAAATAAAAGTCAGGATGATGCCAAGGCGGAAAGAATGACTCAAATTTCTGAAGTGATTGAGTATGAAATGCAGCAACCTATCCCAACTTATTTGCCTAAGGCGCATCTAGATGACTCGGGTATTGAAAAAAGTGATGACAAA	100137	-	ATGACTCAA		AA		RR-YY		7.44442	619	186	619
215	3	104043	104191	CCCTGCGACAATGCCATGCGTGTCCCTTCTCCTTCTTCTGCATCTTCAGTATTTTCCTCACTCTTTTCCTCTCGTGACTGATTCAACATCAACGACAAATTGGAACGTACATTGTCAAGGATTCGGTGCACTCTGTTGACGTTTTCCAT	-	-							3.02691	257	110	213
216	3	105615	105794	TATATACCATTCCCCGTTCTTGTTAGGTAAAGGTTAAAAAAATATTTTTTATGGCACTTCGGCGATGCGAAAGAAAGTGAGTCACGATAACGGTGAGGTGATTCGTTGGATGTGCCATCGCACAAGGAATTGCTGGCGTGCTAATTCACGACCTTGCTTGACAAAAGTATCGAGGGGAAT	105695	-	GTGAGTCAC		GC		RY		262.567	31888	3711	14626	ChIP
217	3	106955	107137	ACATTTTTTGACCTTTTATCTATACTTTAAGAAACAAAGGTCCAACGAATAATAAAGAACAAAGAGTAATGAGTAGTTTGTATGTGTCATAATCTCTTCTCTCCGCTTCCCTTTTCTTCCTTCTTCTTCTACTAACTCTCTGCGCGTCCAATTTAGCTATACTGTTGTTGGTGTATTCATAGT	-	-							7.96198	684	173	666
218	3	108483	108701	CCTAACATGAAAAAATTCCATGATGAGCCTGGAGCTGATGATATGACTATAACGCATGATGTGAACTGCTACATCACCCCTTGCCAAACGCCTACTAACGAAAAAATTCAGCATTATAATAATGATTCATTCAACACGACCACCACAGACGATGAACCCACTGATATTTGGGATAGGTCTGACACTTACCAAAACTCATTCGTCACCAATGAAACTTTG	-	-							1.95521	145	67	176
219	3	110799	110932	CTGACCTTGTTATAGTTTTCCTTTTGGCAACCGTGGTTTCCGTCCTACGTAAACATACTGAACTTGACAAAGTATGACCAATAAGGTGACAAATTGTATCAATTTTACCCAAAAGGGCGTTGAATTAAATGGTA	-	-							2.85439	184	92	271
220	3	118887	119014	CCAGGTAAGAAGCAATTGAAGATGATTCACCATTTGAATAAGTGCCCATCATGCGGCCATTATAAGAGAGCCAATACACTGTGTATGTATTGTGTTGGACAAATAAGTCATATATGGAAAACGCATAC	-	-							2.05976	145	71	185
221	3	124283	124446	TTATTCCTCATTCCGTTTTATATGTTTCATTATCCTATTACATTATCAATCCTTACACTTCAGCTTCCTCTAACTTCGATGACAGCTTCTCATAACTTATGTCATCATCTTAACACCGTATATGATAATATATTGATAATATAACTATTAGTTGATAGACGATA	-	-							10.3825	936	214	837
222	3	125065	125250	TTTTCTCGTAGCACACTAAGCTTTCAGAAATCAAATAAGGCAGAGGAAGTGGTTTTGTCGTATTCAATGACTAATTGTAAGACTCGAGTATAACTTATGCAGTTTCCAAGAAGTAAGCAAACAGTTTCTCTCAACCTTTGGTGACACACTATGCGCATGCAAGTCGTAATGCTTCTCTATTTATGT	-	-							14.7111	1232	318	1265
223	3	127606	127770	TTTTGCATGGTTTCTTTGACGCAGTTGTAAAATCATACTCGAAGGGTAGTTGGAAAATTTTCAACATATATTAGTAATACTTTTTCTGTAAAAGTGACACAAGATAAAATGACTCCATGGCCAAGTTGGTTAAGGCGTGCGACTGTTAATCGCAAGATCGTGAGT	-	-							2.30547	148	62	235
224	3	131268	131497	TAGTTACCAACGTTGTAACCACCACCAGCAACATATTTTGAATCGTCATAGAGGTTAGAGATGACCTCGGCAATGGTAGTCTGTGATGCTGTCACAGCTCTCAATGAGTCCAAGAAACCTTTGGCTTCCTTTTGTAATGCCTCACCTGCTCTTTGAAGAACTTTATAACGACGTTCTTCCATGTCATACTCTTTATCAATGGTCTTGTCGACATTCTTAATTATCACACT	-	-							8.17632	937	117	519
225	3	138803	138936	TGTTAGACGAAGTTGTCAAGAGCTCTGCTGCTGGTAACACCGTCATCATTGGTGGTGGTGACACTGCCACTGTCGCTAAGAAGTACGGTGTCACTGACAAGATCTCCCATGTCTCTACTGGTGGTGGTGCTTCT	-	-							4.50638	342	137	385
226	3	142896	143061	GATTATCCCTTCTTCTATTTTATATGTTTCATTATCCTATTACATTATCAATCCTTGCACTTCAGCTTCCTCTAACTTCGATGACAGCTTCTCATAACTTATGTCATCATCTTAACACCGTATATGATAATATATTGATAATATAACTATTAGTTGATAGACGATA	-	-							9.47805	839	199	779
227	3	151559	151700	TTATATTATCAATATATTATCATATACGGTGTTAAGATGATGACATAAGTTATGAGAAGCTGTCATCGAAGTTAGAGGAAGCTGAAGTGCAAGGATTGATAATGTAATAGGATAATGAAACATATAAAACGGAATGAGGAAT	-	-							8.36452	767	167	668
228	3	158766	158919	AGACATAATATAGCCCCATACTAAGGGACCTATGAAACGAGCAGAGGCAGAAATACTAATGGTGGCGCCATTGATGACTGATCTACAACTCAAGGGACTCGAATTATGAATTAATAACATAATTTGTGGTGACGTTAAAGCGCCACAAAATGTT	-	-							3.10533	191	87	316
229	3	162490	162652	TACACTACTATGTAATTTATCTTTGAAAACAACCATGAAAAACTCAATTTTACACACACATGAGTTATCATGAGGAGTCATCAGCCAGACTTAACAATCACACACATTGTTAAGAGTGGAAAAAAATAATAGTGATAAAAGGAAAAAAGCTAACAATTTGGAT	-	-							9.20097	681	216	863
230	3	168369	168487	GACCAGGACTTCTTGTAATATTTTGTATCTCAAAATGAGGTATGTCAGTATGACAATACGTCATCCTAAACGTTCATAAAACACATATGAAACAACCTTATAACAAAACGAACAACATG	-	-							2.28979	139	86	213
231	3	168759	168928	CGTTTTATATGTTAATATTCATTGATCCTATTACATTATCAATCCTTGCGTTTCAGCTTCCACTAATTTAGATGACTATTTCTCATCATTTGCGTCATCTTCTAACACCGTATATGATAATATACTAGTAACGTAAATACTAGTTAGTAGATGATAGTTGATTTTTATTC	-	-							10.6543	845	295	905
232	3	169224	169391	ACTATCGTCTATCAACTAATAGTTATATTATCAATATATTATCATATACGGTGTTAAGATGATGACATAAGTTATGAGAAGCTGTCATCGATGTTAGAGGAAGCTGAAACGCAAGGATTGATAATGTAATAGGATCAATGAATATAAACATATAAAACGGAATGAGGA	-	-							11.9456	1020	250	1016
233	3	169590	169742	AAAATACCATCCATTCAGAAGTATTCATGCTACTAGCATTTTATCACATGAGGTGTAAGAAGATGACATAAAGATTGAGATACAGTCATCAAACCTAATGGAAGCGAAATGCAGGGATTGATAATGTAATAAGATAATGAAACATAAGAAACA	-	-							9.98515	738	253	920
234	3	174721	174872	GAGAGTGTGGAAACTGGACGTTCCTGGGGAATAGAGGACAAGGAAGAAGAAGTAGGGGTAGCGCCTGAGCCGTGATTAGGCAAAGAGTCATAGAGTTGAGAATCCCTGTTATGAATGAAATTTTGTTTCCTTGAGGGTGGTAAAGCAGGTGC	-	-							2.75506	221	96	211
235	3	182680	182844	TATATTCCAATACTCTAAAGCAGATAATCTGGGAGAAAGAAGAATACGAGATGTTTTCTGAGTCACTGATGGCGCATCAGGAAGTTTTATTTGCACATGGAGCATGTGATAATGAGACCGTTGGCTTATTGTTAATATTTTTTGCCAACAGATTACGTGATTGTG	182741	-	CTGAGTCAC		GG		RR-YY		4.02543	292	110	370	ChIP
236	3	195242	195388	CGAAGAAATAGGTGAAGCCATACCACCAATATCTGCCGAAAGTGCAACACCCATGACTAATGCCTTAGCAAACGGTGAAGTGTAGTCCAGCGGATCTAGTAAGGGTGTTAATAGAGAATATGTCAATACTGGGGAGGCAACGTTGGA	-	-							3.13669	223	97	281
237	3	206979	207106	ATCAATCTGCCATTCGTAACTAAAAAAGTCAAACAGTTCCAATGACATGGCCATTGTGGTTACAATCACAAGAAGAATTGGAATGACACACAGTTTGAAGATTTGCCGCTTGAAGCTGGAGTACGCGG	-	-							4.98734	354	148	453
238	3	216225	216591	CTAGTGCTCAAAAATACCAGTTTTTCCACGAACTGTCTTTGCATCCAAGAGAAACGCTGACTCACTACTTATGGTCTTCCAAGCAAAACGAGCTTGTGCTGCAGGGCGACCAATACTTCAATGAAGATGCTGCAAGAACGAGTGACATATACAGTAACAACAACAATGACAGGTCACTAATGGGCAATATCTCACTACTGTACTCCCAAGGAAGACTATAACATCACTGTATGATCTCATTCTTTCTGCAATTATTGCACGCCTCCTCGTGAGTAGTGACCGTGCGAACAAAAGAGTCATTACAACGAGGAAATAGAAGAAAATGAAAAATTTTCGACAAAATGTATAGTCATTTCTATCAATAACG	216285	-	CTGACTCAC		CC		RR-YY		12.1756	1061	284	987	ChIP
239	3	220516	220701	GTAATTTGTTATCCTTCCCATTGAAACCAATCCATCCTTCCTCGTCGTCAGATTCCATGACTACATCGTTCTCTTCGTTCTCTTCGTTATCTTCATCTGCGTCATCTTTTAATAGAACCTCGTCATCATCAGCCGCGCCATCTTCCATGGACCCATCAGTTGATACCAAAAATCTATAGGTGTATT	-	-							27.7127	2842	531	1928
240	3	231874	231995	AGAGTCTGAAAGTGACAGTGTAAATGCCGCTGATGATGACTTGCAAATTGTTGCAACAAGTGAAAGAAAACTTGCCAAAAGATCCATGACTGATATATTACCACTGAGTTCCAAACCATCCA	-	-							2.1225	142	76	192
241	3	232249	232442	CTCATGTGGTGAGACCTCACATGTGGATAAGTATTTAAACTCAATGATGAGTGCAGAACACCAAAGATTGCCGAAGATCAATTTTACGTCTATGACTCAATCCCAAATAAAACAAAAACTGTCATCGTTGGGACTGTCAACTAATGGTACTAGGCAAAACATGATTAAAAGATACAATCACTACGAAATGCTTT	232344	-	ATGACTCAA		AA		RR-YY		21.2093	1718	461	1878	ChIP
242	3	237633	237775	AGATCCTGAATTCATAGAGTCGTACATTTACGGAGAAACATACATGACGGAGGAGGAAGAACACGCCATGTGGATAGATGATGACATTGTGGCACCCAATATCACAGATAGAGGTACAGTAGTGTCGTTAGCATTAATGTCGT	-	-							2.70801	231	89	202
243	3	248233	248379	CATCTAGAAACACACCCTGAATGGGGAAACAATCCATAGATTTTCTTGTCGAGTTATGCGTCACTTGTGGGATGTACTTGATTAGTGACATCGATATTTTGAGTAAAAACAAATTGTTGCAATACGCCAGAGTTCTTGAGTTATGCC	-	-							3.99929	257	108	402
244	3	248595	248808	GGCCTGCCCAAGTCAGACTCATCACCCGTCATTTTCCAGCAGTACAATTGCAAAAATATGGATATGACCAGGTAAGAGTAACCTGCCGTATTTAACATGACAAAATCCATCGATATCGCGCTCGCTGACTTATGGCGCCAATTGGTGATTATCGGTGGATACATCGATATCGACCATGACGTAACATACACGATACCTAGTATATCGTCTAACG	-	-							4.36523	447	101	289
245	3	249763	249928	TCAATTCTGTGGGCAATTTAAAATCGCTGTAACCCACCACACATGCCATGGTGATCGACGTACCATGACGAATAACAACAGTATACTTGTCATTGTCATCCAGAGTCTGAATCACCACTAGCTCAGAGAGAAACGATGTTGAACCCTTCTCACTGGGAGAATCTTT	-	-							18.5954	1617	378	1563
246	3	253472	253625	TTTCTATATCCGTATGATGATCCGAATGCACCCATTGATGAGGGGAAAGACGATGACTCGTGGATCATATCGCACTCTGGATTGCTCAAACTCATTGTCACGCAGGTGGGCGACTCTAAGATCATCCTCTGCGATCAAGACGGGATTGCACACG	-	-							5.65651	458	172	452
247	3	254527	254662	GGCTTTTACCATACACCAATGGTAAATTTCGAGTCCATATCTGCGAGATCATCTGTTCATGAATCATTAGTCACTCAATCCAACATTCTTTCCCAGCAATTCGACAAAATTATCAAGATTAGAGAAGACCACATTA	-	-							3.49219	241	108	319
248	3	257480	257611	AAACCGATCTTAACGATATTCCATTGGGTAGTGGACAACCAGACAATGACACTGTTGTAACCAACGATGATAAAAGTGACGATGATGATCACACAGTCGACGAAATTGATCATGTAGAATATTACGTTATGA	-	-							3.15238	222	114	270
249	3	258461	258600	GGCTCATTTATGACAAGAAAGATCATAAATATGTCTGCACATTTTCCATGGAGCCGTACCACTTCATCTCCAACTATAATACCAAGTACACAGATGACATGGCTACAGGCAGTAATGATACGACTGCGTTTAACGATTCC	-	-							3.83722	361	91	284
250	3	271158	271735	CTGCTTCAACGTTAGCATATTCCCCCTCTGTTTCTACATCATCATCATCATCATTCTCAACAACAACTGCATCAACACTAACGTCAACACACACCTCTGTCCCGTTATTACCATCATCTAGCTCTATATCAGCATCTTCGCCATCATCAACTTCGTTGTTATCCACTTCTTTACCATCTCCCGCTTTTACGTCATCAACACTTCCAACAGCAACAGCAGTATCTTCCTCCACTTTCATAGCGTCTTCTCTACCATTGTCCTCTAAATCATCATTGTCGTTATCGCCAGTCTCGTCGTCTATTTTGATGTCTCAGTTTTCATCATCATCATCATCATCATCATCATTGGCATCGTTGCCATCTCTTTCTATATCACCAACTGTTGACACTGTTTCTGTTC…	-	-							7.39214	756	163	497
251	3	272289	272442	ATATATGCTATAAACAGACACTCTTTTTACTTACCTTTAATAATGCTTGATGAGAAATCAGTCATTGTTACTTCTTCCCCAAGGTTGTCATCATAATCATACCATTCATTATCCTCTAGTTGGCATGACATTACTTTCCCCGAACTTAGAGAAA	-	-							6.57138	491	167	607
252	3	274331	274481	TGTTTGAAACGTACAAGAATTCATTGAGTGCCCTAAGGATTACTGCAAACAAGGTTCAACAGTGTTGGTACACATGACTCAGCAAGAATACCGTTCCCCCTCACAACGCTTATCCAAGGGGAGGAGCATGTCGCTACCCAAAATATTTGCT	274408	-	ATGACTCAG		AG		RR-YY		4.38614	302	155	382
253	3	277554	277676	ATTATGGCTTGTTGACCATTCACAAAAGTTGGTCTAACATAATTTACGTTGCATGATGTGGCTGCTAACGACAAAATACAGTCATACTGCGCCAAATTGAGTGTAATTTTACGGAGCTCTGTA	-	-							2.45185	172	91	210
254	3	281308	281495	TTCGTTTTATTGATAGAAAACAGGACAGTCATAGACGAAATACTTATTACCTTATTGATTCAAGTGCATAATAAATCACCGTCATCGTTCAAGGACGTTATTTCTACAATAACCGATGATTCTAAAATCGTAGATGCAGCAAAAATCATAATCAACTCGGATGACGCACCTATTGCCAACTTTTTAAA	-	-							3.19943	224	79	309
255	3	283931	284055	AGAATATTCCAAACTTGGATGTTATTCCGTTTGCAGGATTGCCCGCTCACGCTCCACCGATGACTCAAAATGTGGGTTTAACTCAGCCTCAGCAACAACAAGCGCAAATGCCTACCCAAATCCTA	283994	-	ATGACTCAA		AA		RR-YY		2.52504	173	84	226
256	3	290056	290200	TGGTGTCGCCTGCATCGCTGGCCCTCCCCTCCACTACGGCCATTTTAGCACAACTTGAATGAGTCAACTTGGTTGAGTTGCATGTTAACGTCTCTGATATCAGAGCTCACTTGCTCAATAATACATGTTACAAACTGCCCACTAA	290118	-	ATGAGTCAA		TT		RR-YY		3.63334	254	122	319
257	3	291388	291547	CTGATATCATCTATATAGTAGTACTCACGTTACTAGTATATCATCTATAAGATGTAGGAAAATGTCATAAGAAATGAGAAACAGTCATTAAATTTAATGGAAACGAAATGCAAGGATTGGTGATGAGATAAGATAATGAAACATAGAAAACGAAAGGAGA	-	-							4.44888	328	106	418
258	3	294994	295154	TTTCCTAAATGTTGGAATAAAAAACAACTATCATCTATCAACTAGTAGTCACACTACCAATGTGTTATCATTATACTGTGTTAAACAATGACATAAGGTATGAAAATTTGTCAACGAAGTTAGAGAAAGCTGGATGCAAGGATTGATAATGTGGTAGGAAA	-	-							3.18897	250	96	265
259	3	304112	304276	TTTTATGTGCTTGGTACATATGAGTTCAATAGATATGTAGTAGTTGGATAGTAGATAGTAAGGATATATAATCATGGAAGGGTGACGCACAACAAATCACATAATGAGTTATGATTTTCACTGTTCTCATCTGTTTCCCCTACAAGGCGTGATCAATAACAAACA	-	-							3.73267	297	100	318
260	3	310791	310949	GGTAGATTTTCTACTCAAGACCCGTGCAGATCACTATTACACTCATTATTACAAGTCATTGAGAACGAAATTTTGACATCATTACTAATAATGTTACTCATTAATACTTTATTAATGTAAGCGGTAGATAAACAAATGAACATGAAATTGGCTGCTGAA	-	-							8.85071	665	198	832
261	4	914	1112	TAATACTATCATGGTATCATTAACTTAAAGTTCCTTAATATCGTCATACCACTATGCTCTATTCCATATATTGTAATATAACTGTACTCTATAGTCATACAGACGCTTTTACTTCACCCCATCTTCTCATACTATTGTCATAGAATCTCACACTGACGCATGATTAAAACGAATAATTTTTACTGTAAGGGCTGCCATC	-	-							7.86788	582	157	766
262	4	8004	8129	TCTTTCTCATCCGAGTATGGCGCGTGAAGAAAATGAAGATGGAGTTGTCGAAACAAATGGTCATCGACATTAGTTTAATTGTCATAGTAACAGTCTGGGCACTCACTTCGTACATCCCTTATACAT	-	-							2.13295	140	79	189
263	4	21266	21435	ATTTCTCAAAAACAAAGGTGCAATTACATGTTAAGCACCGAATTTCTATGCGAAACAGGTCCGTCTCATCAGTCATAGCTTTCCAAGTATATAAAACTTGAACGCAAAAGTGCGTCATCGACGCCTTTTTTTGCGCAAGGATTGTTACTATTCATTTAATGAACTCTGAT	-	-							19.5834	1663	358	1727
264	4	36394	36559	TAGCAGGAAACCAGCAATATTATCTCTAGCATCGCTTGTTGGGTGTAAGAACACTTTAGATTTGCAGAATAGTATCTTACTCATCAGGGGATGTATGAATGACTCTTGTAGAACTTTGCCAATTTGTGCAACCTATATCTGAGAAACTGAATAGTATATTTGAGCA	-	-							8.42203	662	168	785
265	4	48536	48797	CTTTCTGTAATATGTCATAATATTTCAATACACGCACAAAAAAGGTACGTTAATTTCCATGGTAATCGTGTATTTAGTTACATCACTTTTCGTGACACACATGAATACATTTGCCCTTAAGCCCTGTGTAGGATTGATTTCTTTTTTCGTGACGCACATGTCTTCAACTGCATCAATTTCCATGAGACACACACGTCTACCATGTTGTCAGATCTCATGAATCTTTCATGTATTCATTCACATCATTTTCGTGGATCCTCTA	-	-							4.61617	370	134	382
266	4	49539	49733	AAGTAAATAGGTCATATAATGGAATGATAGTAGTACTTGATAAAGGAACCATGTGATCTTACGTTGATATGAAAATAATTCTCTCACAGAAGTCAGTTTGTATGACTAACATAGAGAGTAATTGCTTTTCGGATAAAATCGCACCTAACAAAGATTACCTTTTGTAAAGCCTCCAGAACAGCTATGAATGTTCGT	-	-							7.09416	454	207	697
267	4	52805	52917	CCAGAAATGAACGAGGATGATACCGTGTTTTTCAACTTGATTATGACGCATGGTATAGGCGAAAACTTGGACGATTCGTTGTGTTCTGAGGAAGTTATGTCGTATTTAGAACA	-	-							2.09636	135	106	160
268	4	53027	53188	CTGAGAGAAGTCGATGTAGAGCTCATGAAAAGCATCTCCAAATACACAAATGTACTGCCAATAATAACAAGAGCTGACTCATTCACCAAGGAGGAGCTAACTCAATTCAGGAAAAATATTATGTTTGATGTGGAAAGATACAACGTCCCAATTTACAAATTT	53104	-	CTGACTCAT		CT		RR-YY		4.76778	303	136	473	ChIP
269	4	57814	58018	ATTGACATCAATATTATCGTCGCTAGAATATTCTTGATTTTGGGAATTGCCGCCAGAACCGTAACTGGCCTTTTGTTCTGATGATGGTTCCTGATCGTGAGTCATTCCAGTAATATCTTGTGATTTGGCATATGTAGGGTCCGCATTTTTAATATTATCGTAAGCAGCTGTTTCAGCATCCCCTGATTTGGAGTATGTAGTGTCT	57914	-	GTGAGTCAT		AC		RY		51.4627	4742	988	4115	ChIP
270	4	59736	59888	CATGAGTATTGGTAGGAGATGTGGTTTTCACACTGGCATGACCATGTGTGTGAGTGACAGGGGAAGTGGTAGCACTGGAATGACCATGCGTGTGAGTAACAGGAGAAGTGGCAGCTTTGGAAGTGCTGTGGTTATGAGTGGTTGCAATACTTG	-	-							6.84845	634	207	469
271	4	67222	67434	ACACGTTACACCACAACAACAGCGGACCCTAAGACGCGTTACACCACCAACGATCGTAATCCTGGTTCTGCGAATGTCGCTAACAGTGCAGTGGACCAGCACGCTTACTCTACGGATGAGTCAGGTGATCGGTCTTATCAAGAAAAGGTCACAGAAGGAGCTCACTCTGGCGCTATGAGTGGTAGCACTGCAGAACCAAACAGGAACGTCAAT	67341	-	ATGAGTCAG		CT		RR-YY		26.4319	2556	546	1954
272	4	69443	69654	TGGTAGTAGCCAACTTAATCCTTGTTCTAACATTTTTGGAATCCATCAAATAGCTATACTGCTTCATTGAATCGATCAATCTATTTAATGATATTTGTTCTGACTCATCATCCTCTATTACGCAATGTAAGTTTAACTTTGTTTCAAATAGCGCTCGGTTCAATTCTGAATCAAATATGATTGTTTCTAGTTCATAGTATGAAGTGGCACTA	69546	-	CTGACTCAT		CT		RR-YY		51.7293	4681	863	4351	ChIP
273	4	69823	69991	TGTGAATGGAACCAGCCAACAACATTCAGTTTAGCGCCCTTGTAATCTCGCCCATCACCACCGTCATTATGATTATACATCTCGTCGATATATTGAACCATATATTCGTATGACTCCAATTGTGCATTTACGCGAGTTTCTGTCCCTACTACGGGAAGATTGAAACAAT	-	-							17.9105	2048	258	1127
274	4	74661	74859	TTTTGTGAGTTTCTTCTGGTAGTCTGTGCAGAATGAAATTGGGACCCATATCAATGACTCCTTCTTCGTAGCCATCATTATCATAATTATTGCTGTCATCGGTAGCAGGCCGTGTCACAAGATCTTTAAAAGATGACACACCTCTTCCGGAACAAAATGCCTTGAATTGAACATCTTTCACTTTGGGATATTTCCAAGG	-	-							53.3552	5167	909	4133	ChIP
275	4	79306	79478	TCTCAAAAAGCTATTGGTTTGCTGAATATTTGGCCGAGTAATAGTAGACGCACTGGAACTTGTTTCTTCAATGGATGACTCCGCAGATTCATTGTATGACGATACGTATGAAAATCTCCCGGATTCGTGATCCGCCATCCCATAATAAGGATGTGCTATATATATACCGTCTG	-	-							33.6045	3179	489	2761
276	4	90295	90419	ACTTATTGAATGCTTCTCTTTACTAGGAGTGGTTACCTCTGACTGCTTAACACCATCTTTGTCATACATTTCCAGTAACATATTCCATATTTCCGATAGAGTATCCGGCATGACTTTATTAGCAT	-	-							2.09636	149	81	173
277	4	91625	91821	ACCGCTTGGCATAGTTTCCAACTTTACAATTACTTAACAGATGTGTCCTTGGAAATTGGTTTCTTTGAGTTCTTGTCATTATTAGTCACTACGCCGGTATCAATAATTCTTTATCTTTCAATACCATCAGAGATAAGTCAAACAGACCATGACTTACCCCTTTCATACCTACAGAATATTCAATTGATTGCTTCGCC	-	-							8.51613	640	186	804
278	4	104597	104781	TCTAAAGGCTAAATATTAACCATCAAAAGAGATACACGATTTATATAGTCACCTCTATATATCTATGTCGTCGCTTTGTAGAAAATGTGACAGCAAATGCACAGTGACTCACGAGTTTTTGTTTTCTCGAGCTTTATCAAGAATTGCGATCGTTCTTTAATTTTCATTTTCTTTTTTTTTCGGGC	104704	-	GTGACTCAC		GC		RY		66.1999	7071	917	4677	ChIP
279	4	105115	105244	CTTCAGGTTGGCTATATGTGGTGGTTGTAGTCTTGATAAGTAGGATTTCCTTGATGAGTAATCAAGGTTTAGTGTTGTGCTCTTTTCGGAATATGACTGCCCGTCTGGAGCCGCTAATAGAAGCCGTTGA	-	-							3.76403	281	104	335
280	4	110141	110287	GGTATCACCACCTCCTCTACACAAAAATTCTAGAGTCCCATCCTTGGTTGCAACTTCTGAGTCACCAAGGGCATCCATATCAAATCCATACGCTCCTCCTCAATCATCACAACAATTCCCAATAGGTACTATTTCTACAGCAAACCA	110201	-	CTGAGTCAC		GG		RR-YY		4.72595	325	134	446	ChIP
281	4	121252	121437	ATGAAAGCACCATTCATGCAAAAGTTTTCTATTTGTAAGGCAACGACACCATAGCCAATGACAAGACGATCAATCTCTTGGAAAGTGGAATGTAATGACTCAGCATTTGGCTTGTTTTTGGTGATTCTTTTTTGTTGCTGATTACGGCGAAAGCAATCGTTCAAATATTCAAACGGTTTATCCAAC	121350	-	ATGACTCAG		AG		RR-YY		10.189	769	239	942	ChIP
282	4	122791	122997	TGATAAGCTCAACAAGAGTGAAGACGATGTAAAGTCAACCAACAGTAGCGGTAGTAGTGATAGTGACAATGAATGGAGTGATTGGTTGAACGGAGATGACTCTAACACACAAACTAGTAACGGTTCAGTTAGCTCTTCATCACCATTCAATTCATCTGTGACGACGATACAAGTAAACAAACCTCAACAACAATTTTATGATAGTCG	-	-							11.8515	1038	302	928
[truncated: 2,077 more rows]

## Sheet: Table S4
2021-10-09
Coey & Clark: Table S4. List of the 1078 AP-1 motifs (TGACTCA) in the yeast genome with associated data.
										Occupancy of central base of motif					Normalised combined data
[truncated: 1,082 more rows]
